# Supplementary material for: Foliar and Root Comparative Metabolomics and Phenolic Profiling of Micro-Tom Tomato (Solanum lycopersicum L.) Plants Associated with a Gene Expression Analysis in Response to Short Daily UV Treatments
Source: MDPI journal article supplement (doi:10.3390/plants11141829), 2022-07-12
Supplement: s1 [file s1]

**Table S1.** Primers list for qRT-PCR in Micro-Tom tomato plants (*Solanum lycopersicum* L.).

| Target gene      | Accession number | Forward primer (5'-3')  | Reverse primer (5'-3') |
|------------------|------------------|-------------------------|------------------------|
| <i>HY5</i>       | NM_001247891.2   | TGCCGCTAGTTCACCTT       | TGGGCTTCTTCCTCTCTTCC   |
| <i>COP1</i>      | NM_001247118.2   | GTGATTGCCCCTGTTGTTCT    | GCATATTTGCTCTGCTTCC    |
| <i>PAL</i>       | XM_026029821.1   | GCGTGGCTGGTATTAGTGGT    | GGCTTTCCGTTTCATCACTTC  |
| <i>CHS1</i>      | NM_001247104.2   | ACCAACAAGGTTGCTTTGCC    | GAGATTCACTGGGTCCACGG   |
| <i>FLS1</i>      | XM_004250281.4   | GAGCATGAAGTTGGGCCAAT    | TGGTGGGTGGCCTCATTAA    |
| <i>ACTIN7</i>    | NM_001321306.1   | CGTACAACCTGGTATTGTGTTGG | CGGTGAGGATCTTCATCAGGT  |
| <i>UBIQUITIN</i> | NM_001345879.1   | CAAGACATTGACAGGGAAGAC   | CCACCTCTAAGGCGAAGAAC   |
| <i>EF1</i>       | XM_004240531.4   | GCTGCTGTAACAAGATGGATGC  | GGGGATTTTGTGAGGGTTGTAA |
