# Supplementary material for: Foliar and Root Comparative Metabolomics and Phenolic Profiling of Micro-Tom Tomato (Solanum lycopersicum L.) Plants Associated with a Gene Expression Analysis in Response to Short Daily UV Treatments
Source: MDPI journal article supplement (doi:10.3390/plants11141829), 2022-07-12
Supplement: s1 [file s1]

Table S4. Dataset of foliar phenolic compounds using the database exported from Phenol Explorer. The average of the compound intensity is provided (where 1 indicated not detected), together with annotations (raw formula and ID score).

| Compound                | CTR-11d  | CTR-rec  | UV-11d   | UV-rec   | Annotation                                                     |
|-------------------------|----------|----------|----------|----------|----------------------------------------------------------------|
| 3-Methylcatechol        | 1.32E+05 | 1.25E+05 | 4.43E+05 | 3.42E+05 | 3-Methylcatechol [ C7 H8 O2, tgt=47.31, overall=47.31 ]        |
| Guaiacol                | 1.32E+05 | 1.25E+05 | 4.43E+05 | 3.42E+05 | Guaiacol [ C7 H8 O2, tgt=47.31, overall=47.31 ]                |
| 4-Methylcatechol        | 1.32E+05 | 1.25E+05 | 4.43E+05 | 3.42E+05 | 4-Methylcatechol [ C7 H8 O2, tgt=47.31, overall=47.31 ]        |
| Punicalagin             | 2.24E+05 | 2.88E+05 | 1.45E+05 | 2.42E+05 | Punicalagin [ C48 H28 O30, tgt=16.38, overall=16.38 ]          |
| 4-Vinylphenol           | 1.01E+07 | 8.45E+06 | 1.10E+07 | 1.06E+07 | 4-Vinylphenol [ C8 H8 O, tgt=85.99, overall=85.99 ]            |
| Benzoic acid            | 9.64E+05 | 4.12E+05 | 6.65E+04 | 2.11E+05 | Benzoic acid [ C7 H6 O2, tgt=22.45, overall=22.45 ]            |
| 4-Hydroxybenzaldehyde   | 9.64E+05 | 4.12E+05 | 6.65E+04 | 2.11E+05 | 4-Hydroxybenzaldehyde [ C7 H6 O2, tgt=22.45, overall=22.45 ]   |
| Coumarin                | 2.83E+06 | 2.51E+06 | 2.04E+06 | 2.54E+06 | Coumarin [ C9 H6 O2, tgt=45.82, overall=45.82 ]                |
| p-Anisaldehyde          | 3.49E+05 | 2.59E+05 | 3.13E+05 | 2.52E+05 | p-Anisaldehyde [ C8 H8 O2, tgt=53.33, overall=53.33 ]          |
| Hydroxytyrosol          | 2.14E+05 | 2.43E+05 | 2.77E+05 | 2.48E+05 | Hydroxytyrosol [ C8 H10 O3, tgt=53.33, overall=53.33 ]         |
| 3-Hydroxybenzoic acid   | 3.80E+05 | 6.55E+05 | 5.13E+05 | 1.93E+05 | 3-Hydroxybenzoic acid [ C7H6O3, tgt= ]                         |
| Protocatechuic aldehyde | 5.01E+05 | 6.55E+05 | 5.13E+05 | 1.93E+05 | Protocatechuic aldehyde [ C7 H6 O3, tgt=56.17, overall=56.17 ] |
| Sesamol                 | 4.98E+05 | 6.70E+05 | 5.13E+05 | 1.93E+05 | Sesamol [ C7 H6 O3, tgt=56.17, overall=56.17 ]                 |
| 4-Hydroxybenzoic acid   | 4.89E+05 | 6.55E+05 | 5.13E+05 | 1.93E+05 | 4-Hydroxybenzoic acid [ C7 H6 O3, tgt=56.17, overall=56.17 ]   |
| 2-Hydroxybenzoic acid   | 4.89E+05 | 6.55E+05 | 5.13E+05 | 1.93E+05 | 2-Hydroxybenzoic acid [ C7 H6 O3, tgt=56.17, overall=56.17 ]   |
| Tyrosol                 | 1.03E+07 | 8.65E+06 | 1.10E+07 | 1.08E+07 | Tyrosol [ C8 H10 O2, tgt=85.99, overall=85.99 ]                |
| 4-Ethylcatechol         | 1.03E+07 | 8.65E+06 | 1.10E+07 | 1.08E+07 | 4-Ethylcatechol [ C8 H10 O2, tgt=85.99, overall=85.99 ]        |
| Anethole                | 1.00E+00 | 1.00E+00 | 3.20E+04 | 2.30E+04 | Anethole [ C10 H12 O, tgt= ]                                   |
| Estragole               | 1.00E+00 | 1.00E+00 | 3.20E+04 | 2.30E+04 | Estragole [ C10 H12 O, tgt= ]                                  |
| Pyrogallol              | 1.66E+06 | 1.54E+06 | 1.44E+06 | 1.51E+06 | Pyrogallol [ C6 H6 O3, tgt=80.25, overall=80.25 ]              |
| Cinnamic acid           | 6.97E+05 | 2.25E+05 | 2.52E+05 | 2.24E+05 | Cinnamic acid [ C9 H8 O2, tgt=51.37, overall=51.37 ]           |
| Thymol                  | 1.92E+07 | 7.78E+06 | 1.49E+07 | 7.85E+06 | Thymol [ C10 H14 O, tgt=64.52, overall=64.52 ]                 |
| Carvacrol               | 1.92E+07 | 7.78E+06 | 1.49E+07 | 7.85E+06 | Carvacrol [ C10 H14 O, tgt=64.52, overall=64.52 ]              |

|                                |          |          |          |          |                                                                       |
|--------------------------------|----------|----------|----------|----------|-----------------------------------------------------------------------|
| 4-Hydroxyphenylacetic acid     | 5.36E+04 | 1.00E+00 | 3.87E+04 | 2.85E+04 | 4-Hydroxyphenylacetic acid [ C8 H8 O3, tgt=73.01, overall=73.01 ]     |
| Vanillin                       | 5.36E+04 | 1.00E+00 | 3.87E+04 | 2.85E+04 | Vanillin [ C8 H8 O3, tgt=73.01, overall=73.01 ]                       |
| Umbelliferone                  | 5.99E+06 | 4.44E+05 | 8.91E+04 | 1.76E+05 | Umbelliferone [ C9 H6 O3, tgt=33.07, overall=33.07 ]                  |
| 4-Hydroxycoumarin              | 5.99E+06 | 4.44E+05 | 8.91E+04 | 1.76E+05 | 4-Hydroxycoumarin [ C9 H6 O3, tgt=33.07, overall=33.07 ]              |
| m-Coumaric acid                | 3.96E+05 | 1.35E+05 | 1.61E+05 | 1.21E+04 | m-Coumaric acid [ C9 H8 O3, tgt=24.95, overall=24.95 ]                |
| o-Coumaric acid                | 3.96E+05 | 1.35E+05 | 1.61E+05 | 1.21E+04 | o-Coumaric acid [ C9 H8 O3, tgt=24.95, overall=24.95 ]                |
| p-Coumaric acid                | 3.96E+05 | 1.35E+05 | 2.31E+05 | 1.21E+04 | p-Coumaric acid [ C9 H8 O3, tgt=24.95, overall=24.95 ]                |
| Dihydro-p-coumaric acid        | 5.82E+05 | 4.02E+05 | 7.35E+05 | 1.00E+00 | Dihydro-p-coumaric acid [ C9 H10 O3, tgt=60.98, overall=60.98 ]       |
| Methoxyphenylacetic acid       | 5.82E+05 | 4.02E+05 | 7.35E+05 | 1.00E+00 | Methoxyphenylacetic acid [ C9 H10 O3, tgt=60.98, overall=60.98 ]      |
| Vanillic acid                  | 6.11E+05 | 5.10E+05 | 5.65E+05 | 5.27E+05 | Vanillic acid [ C8 H8 O4, tgt=43.89, overall=43.89 ]                  |
| 3,4-Dihydroxyphenylacetic acid | 6.13E+05 | 5.10E+05 | 5.67E+05 | 5.27E+05 | 3,4-Dihydroxyphenylacetic acid [ C8 H8 O4, tgt=43.89, overall=43.89 ] |
| 3,4-Dihydroxyphenylglycol      | 5.40E+04 | 1.00E+00 | 5.55E+04 | 1.46E+04 | 3,4-Dihydroxyphenylglycol [ C8 H10 O4, tgt=73.01, overall=73.01 ]     |
| 4-Vinylguaiacol                | 1.96E+05 | 1.85E+05 | 2.03E+05 | 1.91E+05 | 4-Vinylguaiacol [ C9 H10 O2, tgt=45.13, overall=45.13 ]               |
| 3-Methoxyacetophenone          | 1.96E+05 | 1.85E+05 | 2.03E+05 | 1.91E+05 | 3-Methoxyacetophenone [ C9 H10 O2, tgt=45.13, overall=45.13 ]         |
| Scopoletin                     | 7.51E+04 | 1.00E+00 | 5.18E+04 | 1.30E+04 | Scopoletin [ C10 H8 O4, tgt=74.89, overall=74.89 ]                    |
| Juglone                        | 5.20E+04 | 1.00E+00 | 1.18E+04 | 1.32E+04 | Juglone [ C10 H6 O3, tgt=74.95, overall=74.95 ]                       |
| Isoferulic acid                | 7.06E+05 | 5.09E+05 | 3.68E+05 | 2.12E+05 | Isoferulic acid [ C10 H10 O4, tgt=51.70, overall=51.70 ]              |
| Ferulic acid                   | 7.06E+05 | 5.09E+05 | 3.68E+05 | 2.12E+05 | Ferulic acid [ C10 H10 O4, tgt=51.70, overall=51.70 ]                 |
| Caffeic acid                   | 5.46E+06 | 4.40E+05 | 1.17E+06 | 9.46E+04 | Caffeic acid [ C9 H8 O4, tgt=36.50, overall=36.50 ]                   |
| p-HPEA-AC                      | 1.20E+07 | 1.06E+07 | 1.24E+07 | 1.35E+07 | p-HPEA-AC [ C10 H12 O3, tgt=76.47, overall=76.47 ]                    |
| Dihydrocaffeic acid            | 2.91E+05 | 1.26E+05 | 1.45E+05 | 1.21E+04 | Dihydrocaffeic acid [ C9 H10 O4, tgt=71.10, overall=71.10 ]           |
| Syringaldehyde                 | 2.91E+05 | 1.26E+05 | 1.45E+05 | 1.21E+04 | Syringaldehyde [ C9 H10 O4, tgt=71.10, overall=71.10 ]                |
| Homovanillic acid              | 2.91E+05 | 1.26E+05 | 1.45E+05 | 1.21E+04 | Homovanillic acid [ C9 H10 O4, tgt=71.10, overall=71.10 ]             |
| 3,4-DHPEA-AC                   | 3.75E+05 | 3.53E+05 | 3.22E+05 | 5.19E+05 | 3,4-DHPEA-AC [ C10 H12 O4, tgt=65.27, overall=65.27 ]                 |
| Homoveratric acid              | 3.75E+05 | 3.53E+05 | 3.22E+05 | 5.19E+05 | Homoveratric acid [ C10 H12 O4, tgt=65.27, overall=65.27 ]            |

|                              |          |          |          |          |                                                                       |
|------------------------------|----------|----------|----------|----------|-----------------------------------------------------------------------|
| Hydroxycaffeic acid          | 1.80E+06 | 1.73E+06 | 1.44E+06 | 1.54E+06 | Hydroxycaffeic acid [ C9 H8 O5, tgt=67.38, overall=67.38 ]            |
| Bergapten                    | 1.90E+05 | 1.69E+05 | 1.45E+05 | 1.54E+05 | Bergapten [ C12 H8 O4, tgt=50.87, overall=50.87 ]                     |
| Xanthotoxin                  | 1.90E+05 | 1.69E+05 | 1.45E+05 | 1.54E+05 | Xanthotoxin [ C12 H8 O4, tgt=50.87, overall=50.87 ]                   |
| Mellein                      | 4.05E+04 | 6.66E+04 | 1.00E+00 | 1.00E+00 | Mellein [ C10 H10 O3, tgt= ]                                          |
| Ferulaldehyde                | 4.05E+04 | 6.66E+04 | 1.00E+00 | 1.00E+00 | Ferulaldehyde [ C10 H10 O3, tgt= ]                                    |
| Sinapic acid                 | 6.07E+05 | 1.00E+00 | 1.13E+05 | 1.00E+00 | Sinapic acid [ C11 H12 O5, tgt= ]                                     |
| Isopimpinellin               | 1.00E+00 | 2.20E+04 | 1.00E+00 | 1.00E+00 | Isopimpinellin [ C13 H10 O5, tgt=46.86, overall=46.86 ]               |
| 4-Vinylsyringol              | 5.75E+04 | 3.64E+04 | 9.90E+04 | 8.05E+04 | 4-Vinylsyringol [ C15 H14 O3, tgt=45.18, overall=45.18 ]              |
| Pterostilbene                | 1.00E+00 | 1.00E+00 | 2.96E+04 | 1.00E+00 | Pterostilbene [ C16H16O3, tgt= ]                                      |
| Coumestrol                   | 8.35E+04 | 9.02E+04 | 5.75E+04 | 4.85E+04 | Coumestrol [ C15 H8 O5, tgt=36.60, overall=36.60 ]                    |
| Phlorin                      | 6.08E+05 | 5.81E+05 | 5.48E+05 | 5.66E+05 | Phlorin [ C12 H16 O8, tgt=59.21, overall=59.21 ]                      |
| Dihydroquercetin             | 1.61E+06 | 1.10E+06 | 1.11E+06 | 8.56E+05 | Dihydroquercetin [ C15 H12 O7, tgt=68.84, overall=68.84 ]             |
| Kaempferol                   | 1.61E+06 | 1.10E+06 | 1.10E+06 | 8.57E+05 | Kaempferol [ C15 H10 O6, tgt=68.84, overall=68.84 ]                   |
| Scutellarein                 | 1.61E+06 | 1.10E+06 | 1.10E+06 | 8.57E+05 | Scutellarein [ C15 H10 O6, tgt=68.84, overall=68.84 ]                 |
| Luteolin                     | 1.61E+06 | 1.10E+06 | 1.10E+06 | 8.57E+05 | Luteolin [ C15 H10 O6, tgt=68.84, overall=68.84 ]                     |
| Cyanidin                     | 1.80E+06 | 1.23E+06 | 1.24E+06 | 9.54E+05 | Cyanidin [ C15 H11 O6, tgt=62.96, overall=62.96 ]                     |
| Eriodictyol                  | 7.19E+04 | 1.00E+00 | 1.00E+00 | 1.00E+00 | Eriodictyol [ C15 H12 O6, tgt= ]                                      |
| Bisdemethoxycurcumin         | 1.00E+00 | 4.39E+04 | 1.00E+00 | 1.14E+05 | Bisdemethoxycurcumin [ C19 H16 O4, tgt=10.31, overall=10.31 ]         |
| Formononetin                 | 8.85E+04 | 6.06E+04 | 5.21E+04 | 2.09E+05 | Formononetin [ C16 H12 O4, tgt=40.55, overall=40.55 ]                 |
| (+)-Catechin                 | 1.32E+05 | 6.25E+04 | 8.51E+04 | 4.73E+04 | (+)-Catechin [ C15 H14 O6, tgt=0.58, overall=0.58 ]                   |
| (-)-Epicatechin              | 1.32E+05 | 6.25E+04 | 8.51E+04 | 4.73E+04 | (-)-Epicatechin [ C15 H14 O6, tgt=0.58, overall=0.58 ]                |
| Caffeoyl aspartic acid       | 1.65E+06 | 1.45E+06 | 2.01E+06 | 1.72E+06 | Caffeoyl aspartic acid [ C13 H13 N O7, tgt=37.34, overall=37.34 ]     |
| Cirsimaritin                 | 7.99E+05 | 6.80E+05 | 1.17E+06 | 9.05E+05 | Cirsimaritin [ C17 H14 O6, tgt=47.57, overall=47.57 ]                 |
| p-Coumaroyl tartaric acid    | 1.29E+06 | 1.19E+06 | 1.71E+06 | 1.58E+06 | p-Coumaroyl tartaric acid [ C13 H12 O8, tgt=34.03, overall=34.03 ]    |
| Avenanthramide 2c            | 8.28E+04 | 4.79E+04 | 1.26E+05 | 8.52E+04 | Avenanthramide 2c [ C16 H13 N O6, tgt=48.99, overall=48.99 ]          |
| Avenanthramide K             | 8.28E+04 | 4.79E+04 | 1.26E+05 | 8.52E+04 | Avenanthramide K [ C16 H13 N O6, tgt=48.99, overall=48.99 ]           |
| Phloretin                    | 1.00E+00 | 1.00E+00 | 3.86E+04 | 1.00E+00 | Phloretin [ C15 H14 O5, tgt= ]                                        |
| Hydroxytyrosol 4-O-glucoside | 2.45E+06 | 5.36E+05 | 1.36E+06 | 1.00E+00 | Hydroxytyrosol 4-O-glucoside [ C14 H20 O8, tgt=45.96, overall=45.96 ] |

|                               |          |          |          |          |                                                                 |
|-------------------------------|----------|----------|----------|----------|-----------------------------------------------------------------|
| Caffeoyl tartaric acid        | 4.53E+04 | 2.44E+04 | 1.00E+00 | 1.00E+00 | Caffeoyl tartaric acid [ C13 H12 O9, tgt=22.50, overall=22.50 ] |
| Nepetin                       | 2.86E+06 | 2.56E+06 | 2.88E+06 | 2.64E+06 | Nepetin [ C16 H12 O7, tgt=13.46, overall=13.46 ]                |
| Isorhamnetin                  | 2.86E+06 | 2.56E+06 | 2.88E+06 | 2.64E+06 | Isorhamnetin [ C16 H12 O7, tgt=13.46, overall=13.46 ]           |
| Rhamnetin                     | 2.86E+06 | 2.56E+06 | 2.88E+06 | 2.64E+06 | Rhamnetin [ C16 H12 O7, tgt=13.46, overall=13.46 ]              |
| 6,8-Dihydroxykaempferol       | 6.98E+05 | 7.63E+05 | 7.11E+05 | 7.83E+05 | 6,8-Dihydroxykaempferol [ C15 H10 O8, tgt=7.90, overall=7.90 ]  |
| Myricetin                     | 6.98E+05 | 7.63E+05 | 7.11E+05 | 7.83E+05 | Myricetin [ C15 H10 O8, tgt=7.90, overall=7.90 ]                |
| p-Coumaroyl malic acid        | 4.81E+06 | 5.09E+06 | 4.54E+06 | 4.79E+06 | p-Coumaroyl malic acid [ C13 H12 O7, tgt=97.76, overall=97.76 ] |
| Quercetin                     | 4.81E+06 | 5.04E+06 | 4.48E+06 | 4.79E+06 | Quercetin [ C15 H10 O7, tgt=82.88, overall=82.88 ]              |
| Morin                         | 4.81E+06 | 5.04E+06 | 4.48E+06 | 4.79E+06 | Morin [ C15 H10 O7, tgt=82.88, overall=82.88 ]                  |
| 6-Hydroxyluteolin             | 4.81E+06 | 5.04E+06 | 4.48E+06 | 4.79E+06 | 6-Hydroxyluteolin [ C15 H10 O7, tgt=82.88, overall=82.88 ]      |
| Kaempferide                   | 1.32E+04 | 1.00E+00 | 1.35E+04 | 1.00E+00 | Kaempferide [ C16 H11 O6, tgt=3.17, overall=3.17 ]              |
| Avenanthramide 2p             | 6.40E+05 | 6.60E+05 | 5.97E+05 | 6.10E+05 | Avenanthramide 2p [ C16 H13 N O5, tgt=19.43, overall=19.43 ]    |
| (+)-Gallocatechin             | 6.84E+04 | 5.64E+04 | 5.82E+04 | 6.89E+04 | (+)-Gallocatechin [ C15 H14 O7, tgt=41.31, overall=41.31 ]      |
| (-)-Epigallocatechin          | 6.84E+04 | 5.64E+04 | 5.82E+04 | 6.89E+04 | (-)-Epigallocatechin [ C15 H14 O7, tgt=41.31, overall=41.31 ]   |
| p-Coumaric acid 4-O-glucoside | 3.44E+05 | 1.00E+00 | 9.23E+03 | 1.00E+00 | p-Coumaric acid 4-O-glucoside [ C15 H18 O8, tgt= ]              |
| p-Coumaroyl glucose           | 3.44E+05 | 1.00E+00 | 9.23E+03 | 1.00E+00 | p-Coumaroyl glucose [ C15 H18 O8, tgt= ]                        |
| Carnosol                      | 9.82E+04 | 8.81E+04 | 1.94E+05 | 1.76E+05 | Carnosol [ C20 H26 O4, tgt=29.11, overall=29.11 ]               |
| [6]-Gingerol                  | 8.37E+04 | 1.00E+00 | 5.72E+04 | 1.00E+00 | [6]-Gingerol [ C17 H32 O4, tgt=53.93, overall=53.93 ]           |
| Hispidulin                    | 1.00E+00 | 2.52E+04 | 1.00E+00 | 1.00E+00 | Hispidulin [ C16 H12 O6, tgt= ]                                 |
| Tetramethylscutellarein       | 1.28E+06 | 3.25E+06 | 3.55E+06 | 3.18E+06 | Tetramethylscutellarein [ C19H18O6, tgt= ]                      |
| 3,4-DHPEA-EDA                 | 2.49E+06 | 3.24E+06 | 3.55E+06 | 3.18E+06 | 3,4-DHPEA-EDA [ C17 H20 O6, tgt=34.04, overall=34.04 ]          |
| 8-Prenylnaringenin            | 7.36E+05 | 5.56E+05 | 6.43E+05 | 4.57E+05 | 8-Prenylnaringenin [ C20 H20 O5, tgt=56.93, overall=56.93 ]     |
| 6-Prenylnaringenin            | 7.36E+05 | 5.56E+05 | 6.43E+05 | 4.57E+05 | 6-Prenylnaringenin [ C20 H20 O5, tgt=56.93, overall=56.93 ]     |
| Carnosic acid                 | 8.71E+05 | 8.04E+05 | 8.43E+05 | 7.89E+05 | Carnosic acid [ C20 H28 O4, tgt=61.77, overall=61.77 ]          |
| Galloyl glucose               | 7.25E+04 | 1.15E+05 | 1.00E+00 | 1.00E+00 | Galloyl glucose [ C13 H16 O10, tgt= ]                           |
| Gallic acid 4-O-glucoside     | 1.27E+05 | 1.15E+05 | 2.75E+04 | 1.00E+00 | Gallic acid 4-O-glucoside [ C13 H16 O10, tgt= ]                 |
| 5-Caffeoylquinic acid         | 3.33E+06 | 1.58E+05 | 5.67E+05 | 2.73E+04 | 5-Caffeoylquinic acid [ C16 H18 O9, tgt= ]                      |

|                            |          |          |          |          |                                                                     |
|----------------------------|----------|----------|----------|----------|---------------------------------------------------------------------|
| 3-Caffeoylquinic acid      | 3.33E+06 | 1.58E+05 | 5.67E+05 | 2.73E+04 | 3-Caffeoylquinic acid [ C16 H18 O9, tgt= ]                          |
| 4-Caffeoylquinic acid      | 3.33E+06 | 1.58E+05 | 5.67E+05 | 2.73E+04 | 4-Caffeoylquinic acid [ C16 H18 O9, tgt= ]                          |
| Xanthohumol                | 4.67E+05 | 3.95E+05 | 3.82E+05 | 3.99E+05 | Xanthohumol [ C21 H22 O5, tgt=47.52, overall=47.52 ]                |
| Isoxanthohumol             | 4.67E+05 | 3.95E+05 | 3.82E+05 | 3.99E+05 | Isoxanthohumol [ C21 H22 O5, tgt=47.52, overall=47.52 ]             |
| Cyclolariciresinol         | 4.23E+04 | 7.62E+04 | 6.96E+04 | 1.31E+05 | Cyclolariciresinol [ C20 H24 O6, tgt= ]                             |
| Isolariciresinol           | 4.23E+04 | 7.62E+04 | 6.96E+04 | 1.31E+05 | Isolariciresinol [ C20 H24 O6, tgt= ]                               |
| Lariciresinol              | 4.23E+04 | 7.62E+04 | 6.96E+04 | 1.31E+05 | Lariciresinol [ C20 H24 O6, tgt= ]                                  |
| Ferulic acid 4-O-glucoside | 3.59E+05 | 2.62E+05 | 2.68E+05 | 1.47E+04 | Ferulic acid 4-O-glucoside [ C16 H20 O9, tgt=44.17, overall=44.17 ] |
| Feruloyl glucose           | 3.59E+05 | 2.62E+05 | 2.68E+05 | 1.47E+04 | Feruloyl glucose [ C16 H20 O9, tgt=44.17, overall=44.17 ]           |
| Conidendrin                | 6.74E+04 | 5.75E+04 | 1.00E+00 | 2.96E+04 | Conidendrin [ C20 H20 O6, tgt=47.58, overall=47.58 ]                |
| Arctigenin                 | 1.40E+05 | 4.77E+05 | 2.47E+05 | 3.81E+05 | Arctigenin [ C21 H24 O6, tgt=42.16, overall=42.16 ]                 |
| Rosmarinic acid            | 5.69E+05 | 1.78E+05 | 1.00E+00 | 1.00E+00 | Rosmarinic acid [ C18 H16 O8, tgt=40.78, overall=40.78 ]            |
| 4-Feruloylquinic acid      | 3.85E+05 | 2.18E+05 | 9.70E+04 | 1.73E+05 | 4-Feruloylquinic acid [ C17 H20 O9, tgt=16.35, overall=16.35 ]      |
| 3-Feruloylquinic acid      | 3.85E+05 | 2.18E+05 | 9.70E+04 | 1.73E+05 | 3-Feruloylquinic acid [ C17 H20 O9, tgt=16.35, overall=16.35 ]      |
| 5-Feruloylquinic acid      | 3.85E+05 | 2.18E+05 | 9.70E+04 | 1.73E+05 | 5-Feruloylquinic acid [ C17 H20 O9, tgt=16.35, overall=16.35 ]      |
| Medioresinol               | 3.97E+04 | 1.00E+00 | 1.04E+05 | 1.00E+00 | Medioresinol [ C21 H24 O7, tgt= ]                                   |
| Trachelogenin              | 3.97E+04 | 1.00E+00 | 1.04E+05 | 1.00E+00 | Trachelogenin [ C21 H24 O7, tgt= ]                                  |
| Curcumin                   | 1.00E+00 | 4.45E+04 | 1.47E+05 | 1.00E+00 | Curcumin [ C21 H20 O6, tgt=6.59, overall=6.59 ]                     |
| Isohydroxymatairesinol     | 1.84E+05 | 1.84E+05 | 2.67E+05 | 2.04E+05 | Isohydroxymatairesinol [ C20H22O7, tgt= ]                           |
| Nortrachelogenin           | 1.84E+05 | 1.84E+05 | 2.67E+05 | 2.04E+05 | Nortrachelogenin [ C20H22O7, tgt= ]                                 |
| 7-Hydroxymatairesinol      | 1.84E+05 | 1.84E+05 | 2.67E+05 | 2.04E+05 | 7-Hydroxymatairesinol [ C20H22O7, tgt= ]                            |
| 5-Nonadecenylresorcinol    | 4.43E+04 | 7.48E+04 | 1.12E+05 | 1.38E+05 | 5-Nonadecenylresorcinol [ C25 H42 O2, tgt= ]                        |
| Todolactol A               | 7.53E+04 | 1.00E+00 | 7.65E+04 | 1.00E+00 | Todolactol A [ C20 H24 O7, tgt=37.97, overall=37.97 ]               |
| Piceatannol 3-O-glucoside  | 2.03E+04 | 1.00E+00 | 4.61E+04 | 1.00E+00 | Piceatannol 3-O-glucoside [ C20 H22 O9, tgt= ]                      |
| Oleoside 11-methylester    | 2.24E+05 | 1.00E+00 | 2.19E+04 | 1.00E+00 | Oleoside 11-methylester [ C17 H24 O11, tgt= ]                       |
| p-HPEA-EA                  | 3.00E+05 | 3.80E+05 | 2.25E+05 | 2.18E+05 | p-HPEA-EA [ C19 H22 O7, tgt=47.53, overall=47.53 ]                  |
| Ligstroside-aglycone       | 3.00E+05 | 3.80E+05 | 2.25E+05 | 2.18E+05 | Ligstroside-aglycone [ C19 H22 O7, tgt=47.53, overall=47.53 ]       |
| 3-Methoxysinensetin        | 2.40E+05 | 3.80E+05 | 2.25E+05 | 2.18E+05 | 3-Methoxysinensetin [ C21 H22 O8, tgt=34.20, overall=34.20 ]        |

|                                  |          |          |          |          |                                                                            |
|----------------------------------|----------|----------|----------|----------|----------------------------------------------------------------------------|
| Nobiletin                        | 2.40E+05 | 3.80E+05 | 2.25E+05 | 2.18E+05 | Nobiletin [ C21 H22 O8, tgt=34.20, overall=34.20 ]                         |
| Dimethylmatairesinol             | 2.22E+05 | 5.91E+05 | 2.41E+04 | 1.11E+05 | Dimethylmatairesinol [ C22 H26 O6, tgt=47.39, overall=47.39 ]              |
| Resveratrol 5-O-glucoside        | 5.18E+04 | 1.00E+00 | 1.00E+00 | 1.00E+00 | Resveratrol 5-O-glucoside [ C20 H22 O8, tgt= ]                             |
| Resveratrol 3-O-glucoside        | 5.18E+04 | 1.00E+00 | 1.00E+00 | 1.00E+00 | Resveratrol 3-O-glucoside [ C20 H22 O8, tgt= ]                             |
| Apigenin 7-O-glucoside           | 6.81E+04 | 1.00E+00 | 1.00E+00 | 1.00E+00 | Apigenin 7-O-glucoside [ C21H24O9, tgt= ]                                  |
| 5-Heneicosenylresorcinol         | 3.76E+04 | 7.65E+04 | 1.27E+05 | 1.21E+05 | 5-Heneicosenylresorcinol [ C27 H46 O2, tgt= ]                              |
| 5-Tricosenylresorcinol           | 2.29E+05 | 4.91E+05 | 4.24E+05 | 6.31E+05 | 5-Tricosenylresorcinol [ C29 H50 O2, tgt=29.10, overall=29.10 ]            |
| 6-Geranylneringenin              | 2.93E+05 | 3.22E+05 | 3.63E+05 | 3.44E+05 | 6-Geranylneringenin [ C25 H28 O5, tgt=51.64, overall=51.64 ]               |
| 3-Methoxynobiletin               | 4.77E+04 | 2.91E+05 | 2.91E+05 | 1.00E+00 | 3-Methoxynobiletin [ C22 H24 O9, tgt=0.66, overall=0.66 ]                  |
| Phloridzin                       | 3.24E+04 | 1.00E+00 | 1.00E+00 | 1.00E+00 | Phloridzin [ C21 H24 O10, tgt= ]                                           |
| d-Viniferin                      | 4.77E+04 | 1.00E+00 | 1.00E+00 | 1.00E+00 | d-Viniferin [ C28 H22 O6, tgt= ]                                           |
| e-Viniferin                      | 4.77E+04 | 1.00E+00 | 1.00E+00 | 1.00E+00 | e-Viniferin [ C28 H22 O6, tgt= ]                                           |
| Pallidol                         | 4.77E+04 | 1.00E+00 | 1.00E+00 | 1.00E+00 | Pallidol [ C28 H22 O6, tgt= ]                                              |
| 1-Acetoxypinoresinol             | 4.92E+04 | 1.00E+00 | 1.00E+00 | 1.00E+00 | 1-Acetoxypinoresinol [ C22 H24 O8, tgt= ]                                  |
| Oleoside dimethylester           | 8.41E+04 | 1.00E+00 | 1.02E+05 | 2.57E+04 | Oleoside dimethylester [ C18 H26 O11, tgt=15.65, overall=15.65 ]           |
| Syringaresinol                   | 1.05E+05 | 7.65E+04 | 9.05E+04 | 5.03E+04 | Syringaresinol [ C22 H26 O8, tgt=24.33, overall=24.33 ]                    |
| (-)-Epicatechin 3-O-gallate      | 1.00E+00 | 1.00E+00 | 2.34E+05 | 4.48E+04 | (-)-Epicatechin 3-O-gallate [ C22 H18 O10, tgt=47.29, overall=47.29 ]      |
| (+)-Catechin 3-O-gallate         | 1.00E+00 | 1.00E+00 | 2.34E+05 | 4.48E+04 | (+)-Catechin 3-O-gallate [ C22 H18 O10, tgt=47.29, overall=47.29 ]         |
| Quercetin 3-O-rhamnoside         | 5.25E+04 | 2.08E+05 | 1.00E+00 | 1.25E+05 | Quercetin 3-O-rhamnoside [ C21 H20 O11, tgt=39.67, overall=39.67 ]         |
| Kaempferol 3-O-glucoside         | 5.25E+04 | 2.08E+05 | 1.00E+00 | 1.25E+05 | Kaempferol 3-O-glucoside [ C21 H20 O11, tgt=39.67, overall=39.67 ]         |
| Luteolin 7-O-glucoside           | 5.25E+04 | 2.08E+05 | 1.00E+00 | 1.25E+05 | Luteolin 7-O-glucoside [ C21 H20 O11, tgt=39.67, overall=39.67 ]           |
| 6-Hydroxyluteolin 7-O-rhamnoside | 5.25E+04 | 2.08E+05 | 1.00E+00 | 1.25E+05 | 6-Hydroxyluteolin 7-O-rhamnoside [ C21 H20 O11, tgt=39.67, overall=39.67 ] |
| Kaempferol 3-O-galactoside       | 5.25E+04 | 2.08E+05 | 1.00E+00 | 1.25E+05 | Kaempferol 3-O-galactoside [ C21 H20 O11, tgt=39.67, overall=39.67 ]       |
| Luteolin 6-C-glucoside           | 5.25E+04 | 2.08E+05 | 1.00E+00 | 1.25E+05 | Luteolin 6-C-glucoside [ C21 H20 O11, tgt=39.67, overall=39.67 ]           |
| Kaempferol 7-O-glucoside         | 1.52E+05 | 1.90E+05 | 4.96E+04 | 1.52E+05 | Kaempferol 7-O-glucoside [ C21 H19 O11, tgt=11.76, overall=11.76 ]         |

|                                      |          |          |          |          |                                                                                |
|--------------------------------------|----------|----------|----------|----------|--------------------------------------------------------------------------------|
| Cyanidin 3-O-glucoside               | 2.73E+04 | 3.46E+04 | 1.00E+00 | 1.00E+00 | Cyanidin 3-O-glucoside [ C21 H21 O11, tgt=47.08, overall=47.08 ]               |
| Cyanidin 3-O-galactoside             | 2.73E+04 | 3.46E+04 | 1.00E+00 | 1.00E+00 | Cyanidin 3-O-galactoside [ C21 H21 O11, tgt=47.08, overall=47.08 ]             |
| Petunidin 3-O-arabinoside            | 2.73E+04 | 3.46E+04 | 1.00E+00 | 1.00E+00 | Petunidin 3-O-arabinoside [ C21 H21 O11, tgt=47.08, overall=47.08 ]            |
| Peonidin 3-O-arabinoside             | 2.73E+04 | 3.46E+04 | 1.00E+00 | 1.00E+00 | Peonidin 3-O-arabinoside [ C21 H21 O11, tgt=47.08, overall=47.08 ]             |
| 6"-O-Acetylgenistin                  | 7.64E+04 | 3.69E+04 | 7.01E+04 | 5.79E+04 | 6"-O-Acetylgenistin [ C23 H22 O11, tgt=8.69, overall=8.69 ]                    |
| Delphinidin 3-O-glucoside            | 6.39E+05 | 6.92E+05 | 5.32E+05 | 6.22E+05 | Delphinidin 3-O-glucoside [ C21 H21 O12, tgt=29.77, overall=29.77 ]            |
| Delphinidin 3-O-galactoside          | 6.39E+05 | 6.92E+05 | 5.32E+05 | 6.22E+05 | Delphinidin 3-O-galactoside [ C21 H21 O12, tgt=29.77, overall=29.77 ]          |
| Quercetin 3-O-galactoside            | 4.22E+05 | 4.32E+05 | 3.85E+05 | 4.06E+05 | Quercetin 3-O-galactoside [ C21 H20 O12, tgt=64.42, overall=64.42 ]            |
| Myricetin 3-O-rhamnoside             | 4.22E+05 | 4.32E+05 | 3.85E+05 | 4.06E+05 | Myricetin 3-O-rhamnoside [ C21 H20 O12, tgt=64.42, overall=64.42 ]             |
| Quercetin 3-O-glucoside              | 4.22E+05 | 4.32E+05 | 3.85E+05 | 4.06E+05 | Quercetin 3-O-glucoside [ C21 H20 O12, tgt=64.42, overall=64.42 ]              |
| Quercetin 4'-O-glucoside             | 4.22E+05 | 4.32E+05 | 3.85E+05 | 4.06E+05 | Quercetin 4'-O-glucoside [ C21 H20 O12, tgt=64.42, overall=64.42 ]             |
| Dihydromyricetin 3-O-rhamnoside      | 5.31E+04 | 2.72E+05 | 3.02E+04 | 1.70E+05 | Dihydromyricetin 3-O-rhamnoside [ C21 H22 O12, tgt=39.67, overall=39.67 ]      |
| Ligstroside                          | 8.03E+04 | 1.74E+05 | 5.47E+04 | 1.00E+00 | Ligstroside [ C25 H32 O12, tgt=16.04, overall=16.04 ]                          |
| Malvidin 3-O-(6"-acetyl-galactoside) | 8.11E+05 | 8.77E+05 | 8.95E+05 | 7.26E+05 | Malvidin 3-O-(6"-acetyl-galactoside) [ C25 H27 O13, tgt=18.96, overall=18.96 ] |
| Malvidin 3-O-(6"-acetyl-glucoside)   | 8.11E+05 | 8.77E+05 | 8.95E+05 | 7.26E+05 | Malvidin 3-O-(6"-acetyl-glucoside) [ C25 H27 O13, tgt=18.96, overall=18.96 ]   |
| Lariciresinol-sesquilignan           | 4.38E+05 | 3.45E+05 | 3.99E+05 | 1.93E+05 | Lariciresinol-sesquilignan [ C30 H36 O10, tgt=65.25, overall=65.25 ]           |
| Secoisolariciresinol-sesquilignan    | 2.52E+05 | 4.79E+05 | 2.95E+05 | 3.27E+05 | Secoisolariciresinol-sesquilignan [ C30 H38 O10, tgt=47.13, overall=47.13 ]    |
| 24-Methylcholestanol ferulate        | 6.45E+06 | 2.95E+06 | 3.99E+06 | 3.00E+06 | 24-Methylcholestanol ferulate [ C38 H58 O4, tgt=72.74, overall=72.74 ]         |
| Schottenol ferulate                  | 2.85E+05 | 2.42E+05 | 2.67E+05 | 3.50E+05 | Schottenol ferulate [ C39 H58 O4, tgt=39.54, overall=39.54 ]                   |
| Sitosterol ferulate                  | 2.85E+05 | 2.42E+05 | 2.67E+05 | 3.50E+05 | Sitosterol ferulate [ C39 H58 O4, tgt=39.54, overall=39.54 ]                   |
| Stigmastanol ferulate                | 7.89E+05 | 1.59E+06 | 1.34E+06 | 1.93E+06 | Stigmastanol ferulate [ C39H60O4, tgt= ]                                       |
| Kaempferol 3-O-rutinoside            | 2.20E+06 | 1.43E+06 | 1.45E+06 | 1.05E+06 | Kaempferol 3-O-rutinoside [ C27 H30 O15, tgt=55.34, overall=55.34 ]            |

|                                           |          |          |          |          |                                                                                     |
|-------------------------------------------|----------|----------|----------|----------|-------------------------------------------------------------------------------------|
| Chrysoeriol 7-O-apiosyl-glucoside         | 2.20E+06 | 1.43E+06 | 1.45E+06 | 1.05E+06 | Chrysoeriol 7-O-apiosyl-glucoside [ C27 H30 O15, tgt=55.34, overall=55.34 ]         |
| Apigenin 6,8-di-C-glucoside               | 2.20E+06 | 1.43E+06 | 1.45E+06 | 1.05E+06 | Apigenin 6,8-di-C-glucoside [ C27 H30 O15, tgt=55.34, overall=55.34 ]               |
| Kaempferol 3-O-galactoside 7-O-rhamnoside | 2.20E+06 | 1.43E+06 | 1.45E+06 | 1.05E+06 | Kaempferol 3-O-galactoside 7-O-rhamnoside [ C27 H30 O15, tgt=55.34, overall=55.34 ] |
| Luteolin 7-O-rutinoside                   | 2.20E+06 | 1.43E+06 | 1.45E+06 | 1.05E+06 | Luteolin 7-O-rutinoside [ C27 H30 O15, tgt=55.34, overall=55.34 ]                   |
| Cyanidin 3-O-(6"-p-coumaroyl-glucoside)   | 2.00E+06 | 1.29E+06 | 1.31E+06 | 9.58E+05 | Cyanidin 3-O-(6"-p-coumaroyl-glucoside) [ C30 H27 O13, tgt=40.95, overall=40.95 ]   |
| Petunidin 3-O-rutinoside                  | 2.00E+06 | 1.29E+06 | 1.31E+06 | 9.58E+05 | Petunidin 3-O-rutinoside [ C27 H31 O15, tgt=55.34, overall=55.34 ]                  |
| Pelargonidin 3-O-sophoroside              | 2.00E+06 | 1.29E+06 | 1.31E+06 | 9.58E+05 | Pelargonidin 3-O-sophoroside [ C27 H31 O15, tgt=55.34, overall=55.34 ]              |
| Cyanidin 3-O-rutinoside                   | 2.00E+06 | 1.29E+06 | 1.31E+06 | 9.58E+05 | Cyanidin 3-O-rutinoside [ C27 H31 O15, tgt=55.34, overall=55.34 ]                   |
| Eriocitrin                                | 4.25E+05 | 2.62E+05 | 2.74E+05 | 1.72E+05 | Eriocitrin [ C27 H32 O15, tgt=16.00, overall=16.00 ]                                |
| Neoeriocitrin                             | 4.25E+05 | 2.62E+05 | 2.74E+05 | 1.72E+05 | Neoeriocitrin [ C27 H32 O15, tgt=16.00, overall=16.00 ]                             |
| 24-Methylthosterol ferulate               | 6.06E+06 | 6.00E+06 | 4.54E+06 | 5.10E+06 | 24-Methylthosterol ferulate [ C38 H56 O4, tgt=83.44, overall=83.44 ]                |
| 24-Methylcholesterol ferulate             | 6.06E+06 | 6.00E+06 | 4.54E+06 | 5.10E+06 | 24-Methylcholesterol ferulate [ C38 H56 O4, tgt=83.44, overall=83.44 ]              |
| 24-Methylenecholestanol ferulate          | 6.06E+06 | 6.00E+06 | 4.54E+06 | 5.10E+06 | 24-Methylenecholestanol ferulate [ C38 H56 O4, tgt=83.44, overall=83.44 ]           |
| Peonidin 3-O-rutinoside                   | 3.64E+06 | 4.19E+06 | 4.23E+06 | 3.48E+06 | Peonidin 3-O-rutinoside [ C28 H33 O15, tgt=8.74, overall=8.74 ]                     |
| Neohesperidin                             | 5.71E+05 | 3.85E+06 | 4.53E+06 | 3.31E+06 | Neohesperidin [ C28 H34 O15, tgt=50.66, overall=50.66 ]                             |
| Hesperidin                                | 5.71E+05 | 3.85E+06 | 4.53E+06 | 3.31E+06 | Hesperidin [ C28 H34 O15, tgt=50.66, overall=50.66 ]                                |
| Neodiosmin                                | 2.02E+05 | 1.34E+06 | 1.99E+05 | 2.20E+06 | Neodiosmin [ C28 H32 O15, tgt=37.17, overall=37.17 ]                                |
| Diosmin                                   | 2.02E+05 | 1.34E+06 | 1.99E+05 | 2.20E+06 | Diosmin [ C28 H32 O15, tgt=37.17, overall=37.17 ]                                   |
| Delphinidin 3-O-rutinoside                | 1.80E+06 | 1.18E+06 | 1.18E+06 | 1.49E+06 | Delphinidin 3-O-rutinoside [ C27 H31 O16, tgt=86.65, overall=86.65 ]                |
| Cyanidin 3,5-O-diglucoside                | 1.80E+06 | 1.18E+06 | 1.18E+06 | 1.49E+06 | Cyanidin 3,5-O-diglucoside [ C27 H31 O16, tgt=86.65, overall=86.65 ]                |
| Cyanidin 3-O-sophoroside                  | 1.80E+06 | 1.18E+06 | 1.18E+06 | 1.49E+06 | Cyanidin 3-O-sophoroside [ C27 H31 O16, tgt=86.65, overall=86.65 ]                  |
| Pigment A                                 | 5.97E+06 | 6.00E+06 | 5.44E+06 | 5.62E+06 | Pigment A [ C31 H29 O13, tgt=22.91, overall=22.91 ]                                 |
| Peonidin 3-O-(6"-p-coumaroyl-glucoside)   | 5.97E+06 | 6.00E+06 | 5.44E+06 | 5.62E+06 | Peonidin 3-O-(6"-p-coumaroyl-glucoside) [                                           |



|                                             |          |          |          |          |                                                                                                                    |
|---------------------------------------------|----------|----------|----------|----------|--------------------------------------------------------------------------------------------------------------------|
| Delphinidin 3,5-O-diglucoside               | 5.95E+06 | 5.98E+06 | 5.43E+06 | 5.61E+06 | C31 H29 O13, tgt=22.91, overall=22.91 ]<br>Delphinidin 3,5-O-diglucoside [ C27 H31 O17, tgt=90.33, overall=90.33 ] |
| Delphinidin 3-O-glucosyl-glucoside          | 5.95E+06 | 5.98E+06 | 5.43E+06 | 5.61E+06 | Delphinidin 3-O-glucosyl-glucoside [ C27 H31 O17, tgt=90.33, overall=90.33 ]                                       |
| Quercetin 3-O-galactoside 7-O-rhamnoside    | 7.46E+06 | 7.49E+06 | 6.78E+06 | 7.01E+06 | Quercetin 3-O-galactoside 7-O-rhamnoside [ C27 H30 O16, tgt=59.19, overall=59.19 ]                                 |
| Kaempferol 3-O-sophoroside                  | 7.46E+06 | 7.49E+06 | 6.78E+06 | 7.01E+06 | Kaempferol 3-O-sophoroside [ C27 H30 O16, tgt=59.19, overall=59.19 ]                                               |
| Quercetin 3-O-rutinoside                    | 7.46E+06 | 7.49E+06 | 6.78E+06 | 7.01E+06 | Quercetin 3-O-rutinoside [ C27 H30 O16, tgt=59.19, overall=59.19 ]                                                 |
| Quercetin 3-O-rhamnosyl-galactoside         | 7.46E+06 | 7.49E+06 | 6.78E+06 | 7.01E+06 | Quercetin 3-O-rhamnosyl-galactoside [ C27 H30 O16, tgt=59.19, overall=59.19 ]                                      |
| Kaempferol 3,7-O-diglucoside                | 7.46E+06 | 7.49E+06 | 6.78E+06 | 7.01E+06 | Kaempferol 3,7-O-diglucoside [ C27 H30 O16, tgt=59.19, overall=59.19 ]                                             |
| Prodelphinidin dimer B3                     | 7.46E+06 | 7.49E+06 | 6.78E+06 | 7.02E+06 | Prodelphinidin dimer B3 [ C30 H26 O14, tgt=42.08, overall=42.08 ]                                                  |
| Delphinidin 3-O-(6"-p-coumaroyl-glucoside)  | 7.34E+06 | 7.41E+06 | 6.68E+06 | 6.96E+06 | Delphinidin 3-O-(6"-p-coumaroyl-glucoside) [ C30 H27 O14, tgt=42.08, overall=42.08 ]                               |
| Cyanidin 3-O-(6"-caffeoyl-glucoside)        | 7.34E+06 | 7.41E+06 | 6.68E+06 | 6.96E+06 | Cyanidin 3-O-(6"-caffeoyl-glucoside) [ C30 H27 O14, tgt=42.08, overall=42.08 ]                                     |
| Quercetin 3-O-sophoroside                   | 2.49E+05 | 1.31E+06 | 1.64E+06 | 1.00E+00 | Quercetin 3-O-sophoroside [ C27 H30 O17, tgt=9.03, overall=9.03 ]                                                  |
| Quercetin 7,4'-O-diglucoside                | 2.49E+05 | 1.31E+06 | 1.64E+06 | 1.00E+00 | Quercetin 7,4'-O-diglucoside [ C27 H30 O17, tgt=9.03, overall=9.03 ]                                               |
| Quercetin 3,4'-O-diglucoside                | 2.49E+05 | 1.31E+06 | 1.64E+06 | 1.00E+00 | Quercetin 3,4'-O-diglucoside [ C27 H30 O17, tgt=9.03, overall=9.03 ]                                               |
| Myricetin 3-O-rutinoside                    | 2.49E+05 | 1.31E+06 | 1.64E+06 | 1.00E+00 | Myricetin 3-O-rutinoside [ C27 H30 O17, tgt=9.03, overall=9.03 ]                                                   |
| Cyanidin 3-O-sambubioside                   | 1.00E+00 | 5.64E+04 | 1.00E+00 | 8.53E+04 | Cyanidin 3-O-sambubioside [ C26 H29 Cl O15, tgt=11.48, overall=11.48 ]                                             |
| Pelargonidin 3,5-O-diglucoside              | 6.96E+05 | 7.22E+05 | 6.42E+05 | 6.01E+05 | Pelargonidin 3,5-O-diglucoside [ C27 H31 Cl O15, tgt=22.80, overall=22.80 ]                                        |
| Apigenin 7-O-(6"-malonyl-apiosyl-glucoside) | 4.48E+05 | 4.19E+05 | 4.12E+05 | 3.64E+05 | Apigenin 7-O-(6"-malonyl-apiosyl-glucoside) [ C29 H30 O17, tgt=32.96, overall=32.96 ]                              |
| Quercetin 3-O-xylosyl-rutinoside            | 4.57E+04 | 1.00E+00 | 5.63E+04 | 1.00E+00 | Quercetin 3-O-xylosyl-rutinoside [ C32 H38 O20, tgt= ]                                                             |

|                                                                    |          |          |          |          |                                                                                                              |
|--------------------------------------------------------------------|----------|----------|----------|----------|--------------------------------------------------------------------------------------------------------------|
| Cyanidin 3-O-sambubioside 5-O-glucoside                            | 4.57E+04 | 1.00E+00 | 5.63E+04 | 1.00E+00 | Cyanidin 3-O-sambubioside 5-O-glucoside [ C32 H39 O20, tgt= ]                                                |
| Cyanidin 3-O-glucosyl-rutinoside                                   | 3.78E+05 | 2.03E+05 | 2.13E+05 | 1.27E+05 | Cyanidin 3-O-glucosyl-rutinoside [ C33 H41 O20, tgt=31.26, overall=31.26 ]                                   |
| Kaempferol 3-O-sophoroside 7-O-glucoside                           | 1.40E+05 | 1.00E+00 | 3.17E+04 | 1.00E+00 | Kaempferol 3-O-sophoroside 7-O-glucoside [ C33H40O21, tgt= ]                                                 |
| Kaempferol 3,7,4'-O-triglucoside                                   | 1.40E+05 | 1.00E+00 | 3.17E+04 | 1.00E+00 | Kaempferol 3,7,4'-O-triglucoside [ C33H40O21, tgt= ]                                                         |
| Quercetin 3-O-glucosyl-rhamnosyl-glucoside                         | 1.40E+05 | 1.00E+00 | 3.17E+04 | 1.00E+00 | Quercetin 3-O-glucosyl-rhamnosyl-glucoside [ C33 H40 O21, tgt=29.26, overall=29.26 ]                         |
| Kaempferol 3-O-glucosyl-rhamnosyl-galactoside                      | 3.78E+05 | 2.03E+05 | 2.13E+05 | 1.27E+05 | Kaempferol 3-O-glucosyl-rhamnosyl-galactoside [ C33 H40 O20, tgt=24.23, overall=24.23 ]                      |
| Quercetin 3-O-rhamnosyl-rhamnosyl-glucoside                        | 3.78E+05 | 2.03E+05 | 2.13E+05 | 1.27E+05 | Quercetin 3-O-rhamnosyl-rhamnosyl-glucoside [ C33 H40 O20, tgt=24.23, overall=24.23 ]                        |
| Kaempferol 3-O-glucosyl-rhamnosyl-glucoside                        | 3.78E+05 | 2.03E+05 | 2.13E+05 | 1.27E+05 | Kaempferol 3-O-glucosyl-rhamnosyl-glucoside [ C33 H40 O20, tgt=24.23, overall=24.23 ]                        |
| Kaempferol 3-O-(2"-rhamnosyl-6"-acetyl-galactoside) 7-O-rhamnoside | 2.59E+05 | 1.27E+05 | 2.49E+05 | 2.02E+05 | Kaempferol 3-O-(2"-rhamnosyl-6"-acetyl-galactoside) 7-O-rhamnoside [ C34 H40 O21, tgt=19.58, overall=19.58 ] |
| Spinacetin 3-O-glucosyl-(1-6)-[apiosyl(1-2)]-glucoside             | 2.59E+05 | 1.27E+05 | 2.49E+05 | 2.02E+05 | Spinacetin 3-O-glucosyl-(1-6)-[apiosyl(1-2)]-glucoside [ C34 H42 O22, tgt=19.58, overall=19.58 ]             |
| 1-Sinapoyl-2,2'-diferuloylgentiobiose                              | 8.20E+05 | 8.23E+05 | 9.98E+05 | 8.00E+05 | 1-Sinapoyl-2,2'-diferuloylgentiobiose [ C43 H48 O21, tgt=37.40, overall=37.40 ]                              |
| Spinacetin 3-O-(2                                                  | 1.45E+06 | 1.57E+06 | 1.66E+06 | 1.37E+06 | Spinacetin 3-O-(2 [ C44 H50 O25, tgt=20.00, overall=20.00 ]                                                  |
| 1,2,2'-Trisinapoylgentiobiose                                      | 5.44E+05 | 5.92E+05 | 6.31E+05 | 5.15E+05 | 1,2,2'-Trisinapoylgentiobiose [ C45 H52 O23, tgt=33.53, overall=33.53 ]                                      |

---
