# Supplementary material for: Foliar and Root Comparative Metabolomics and Phenolic Profiling of Micro-Tom Tomato (Solanum lycopersicum L.) Plants Associated with a Gene Expression Analysis in Response to Short Daily UV Treatments
Source: MDPI journal article supplement (doi:10.3390/plants11141829), 2022-07-12
Supplement: s1 [file s1]

Table S5. Dataset of root phenolic compounds using the database exported from Phenol Explorer. The average of the compound intensity is provided (where 1 indicated not detected), together with annotations (raw formula and ID score).

| Compound                 | CTR-11d  | CTR-rec  | UV-11d   | UV-rec   | Annotations                                                    |
|--------------------------|----------|----------|----------|----------|----------------------------------------------------------------|
| 3-Methylcatechol         | 2.43E+05 | 5.06E+05 | 3.28E+05 | 5.24E+05 | 3-Methylcatechol [ C7 H8 O2, tgt=46.72, overall=46.72 ]        |
| Guaiacol                 | 2.43E+05 | 5.06E+05 | 3.28E+05 | 5.24E+05 | Guaiacol [ C7 H8 O2, tgt=46.72, overall=46.72 ]                |
| 4-Methylcatechol         | 2.43E+05 | 5.06E+05 | 3.28E+05 | 5.24E+05 | 4-Methylcatechol [ C7 H8 O2, tgt=46.72, overall=46.72 ]        |
| p-Anisaldehyde           | 2.13E+05 | 1.35E+05 | 2.56E+05 | 2.39E+05 | p-Anisaldehyde [ C8 H8 O2, tgt=42.55, overall=42.55 ]          |
| 4-Vinylphenol            | 5.47E+06 | 8.47E+06 | 6.12E+06 | 5.86E+06 | 4-Vinylphenol [ C8 H8 O, tgt=86.41, overall=86.41 ]            |
| Benzoic acid             | 1.00E+00 | 2.83E+04 | 1.00E+00 | 3.39E+05 | Benzoic acid [ C7 H6 O2, tgt= ]                                |
| 4-Hydroxybenzaldehyde    | 1.00E+00 | 2.83E+04 | 1.00E+00 | 3.39E+05 | 4-Hydroxybenzaldehyde [ C7 H6 O2, tgt= ]                       |
| Pyrogallol               | 8.90E+05 | 1.50E+06 | 7.69E+05 | 1.09E+06 | Pyrogallol [ C6 H6 O3, tgt=65.02, overall=65.02 ]              |
| Coumarin                 | 8.90E+05 | 1.92E+06 | 9.01E+05 | 1.57E+06 | Coumarin [ C9 H6 O2, tgt=21.96, overall=21.96 ]                |
| 4-Ethylguaiacol          | 2.32E+05 | 3.25E+05 | 1.63E+05 | 3.83E+05 | 4-Ethylguaiacol [ C9 H12 O2, tgt=47.10, overall=47.10 ]        |
| Tyrosol                  | 5.54E+06 | 8.49E+06 | 6.16E+06 | 5.90E+06 | Tyrosol [ C8 H10 O2, tgt=86.41, overall=86.41 ]                |
| 4-Ethylcatechol          | 5.54E+06 | 8.50E+06 | 6.16E+06 | 5.90E+06 | 4-Ethylcatechol [ C8 H10 O2, tgt=86.41, overall=86.41 ]        |
| 2-Hydroxybenzoic acid    | 1.42E+04 | 1.00E+00 | 1.00E+00 | 4.85E+04 | 2-Hydroxybenzoic acid [ C7 H6 O3, tgt=43.90, overall=43.90 ]   |
| Sesamol                  | 4.51E+04 | 2.84E+04 | 8.59E+04 | 4.85E+04 | Sesamol [ C7 H6 O3, tgt=43.90, overall=43.90 ]                 |
| Protocatechuic aldehyde  | 4.51E+04 | 2.84E+04 | 8.59E+04 | 4.85E+04 | Protocatechuic aldehyde [ C7 H6 O3, tgt=43.90, overall=43.90 ] |
| 3-Hydroxybenzoic acid    | 3.09E+04 | 2.84E+04 | 8.59E+04 | 4.85E+04 | 3-Hydroxybenzoic acid [ C7 H6 O3, tgt= ]                       |
| 4-Hydroxybenzoic acid    | 3.09E+04 | 2.84E+04 | 8.59E+04 | 4.85E+04 | 4-Hydroxybenzoic acid [ C7 H6 O3, tgt= ]                       |
| p-Coumaric acid          | 1.09E+05 | 1.03E+06 | 2.77E+05 | 2.91E+05 | p-Coumaric acid [ C9 H8 O3, tgt=15.63, overall=15.63 ]         |
| Methoxyphenylacetic acid | 1.00E+00 | 3.10E+04 | 1.00E+00 | 1.00E+00 | Methoxyphenylacetic acid [ C9 H10 O3, tgt= ]                   |
| Dihydro-p-coumaric acid  | 1.00E+00 | 3.10E+04 | 1.00E+00 | 1.00E+00 | Dihydro-p-coumaric acid [ C9 H10 O3, tgt= ]                    |
| Cinnamic acid            | 5.22E+04 | 1.24E+05 | 3.27E+04 | 9.63E+04 | Cinnamic acid [ C9 H8 O2, tgt=11.03, overall=11.03 ]           |
| Thymol                   | 5.74E+06 | 4.18E+06 | 7.55E+06 | 6.92E+06 | Thymol [ C10 H14 O, tgt=65.51, overall=65.51 ]                 |
| Carvacrol                | 5.74E+06 | 4.18E+06 | 7.55E+06 | 6.92E+06 | Carvacrol [ C10 H14 O, tgt=65.51, overall=65.51 ]              |
| 4-Vinylguaiacol          | 4.74E+06 | 5.45E+06 | 3.96E+06 | 4.80E+06 | 4-Vinylguaiacol [ C9 H10 O2, tgt=84.59, overall=84.59 ]        |
| 3-Methoxyacetophenone    | 4.74E+06 | 5.45E+06 | 3.96E+06 | 4.80E+06 | 3-Methoxyacetophenone [ C9 H10 O2, tgt=84.59, overall=84.59 ]  |

|                                   |          |          |          |          |                                                                       |
|-----------------------------------|----------|----------|----------|----------|-----------------------------------------------------------------------|
| Vanillic acid                     | 5.23E+05 | 4.80E+05 | 5.51E+05 | 4.26E+05 | Vanillic acid [ C8 H8 O4, tgt=48.70, overall=48.70 ]                  |
| 3,4-Dihydroxyphenylacetic acid    | 5.23E+05 | 4.80E+05 | 5.51E+05 | 4.26E+05 | 3,4-Dihydroxyphenylacetic acid [ C8 H8 O4, tgt=48.70, overall=48.70 ] |
| Hydroxytyrosol                    | 6.59E+05 | 1.48E+06 | 7.45E+05 | 1.32E+06 | Hydroxytyrosol [ C8 H10 O3, tgt=43.37, overall=43.37 ]                |
| 4-Hydroxyphenylacetic acid        | 7.59E+04 | 9.57E+04 | 3.19E+04 | 8.39E+04 | 4-Hydroxyphenylacetic acid [ C8 H8 O3, tgt=47.37, overall=47.37 ]     |
| Vanillin                          | 7.59E+04 | 9.57E+04 | 3.19E+04 | 8.39E+04 | Vanillin [ C8 H8 O3, tgt=47.37, overall=47.37 ]                       |
| Esculetin                         | 3.47E+04 | 7.97E+04 | 4.32E+04 | 5.65E+04 | Esculetin [ C9 H6 O4, tgt= ]                                          |
| Umbelliferone                     | 1.03E+06 | 2.01E+06 | 6.41E+05 | 3.13E+05 | Umbelliferone [ C9 H6 O3, tgt=45.44, overall=45.44 ]                  |
| 4-Hydroxycoumarin                 | 1.03E+06 | 2.01E+06 | 6.41E+05 | 3.13E+05 | 4-Hydroxycoumarin [ C9 H6 O3, tgt=45.44, overall=45.44 ]              |
| Caffeic acid                      | 1.03E+06 | 2.05E+06 | 7.10E+05 | 5.43E+05 | Caffeic acid [ C9 H8 O4, tgt=45.44, overall=45.44 ]                   |
| Mellein                           | 5.13E+04 | 1.00E+00 | 1.00E+00 | 1.00E+00 | Mellein [ C10 H10 O3, tgt=61.20, overall=61.20 ]                      |
| Ferulaldehyde                     | 5.13E+04 | 1.00E+00 | 1.00E+00 | 1.00E+00 | Ferulaldehyde [ C10 H10 O3, tgt=61.20, overall=61.20 ]                |
| m-Coumaric acid                   | 1.09E+05 | 1.00E+00 | 6.39E+04 | 4.95E+04 | m-Coumaric acid [ C9 H8 O3, tgt=15.63, overall=15.63 ]                |
| o-Coumaric acid                   | 1.09E+05 | 1.00E+00 | 6.39E+04 | 4.95E+04 | o-Coumaric acid [ C9 H8 O3, tgt=15.63, overall=15.63 ]                |
| 2-Methoxy-5-prop-1-enylphenol     | 1.00E+00 | 4.14E+04 | 1.00E+00 | 4.59E+04 | 2-Methoxy-5-prop-1-enylphenol [ C10 H12 O2, tgt= ]                    |
| Eugenol                           | 1.00E+00 | 4.14E+04 | 1.00E+00 | 4.59E+04 | Eugenol [ C10 H12 O2, tgt= ]                                          |
| 3,4-Dihydroxyphenylglycol         | 9.98E+04 | 9.24E+04 | 3.37E+04 | 1.21E+05 | 3,4-Dihydroxyphenylglycol [ C8 H10 O4, tgt=45.64, overall=45.64 ]     |
| Scopoletin                        | 1.00E+00 | 7.33E+04 | 3.68E+04 | 9.05E+04 | Scopoletin [ C10 H8 O4, tgt= ]                                        |
| Juglone                           | 1.00E+00 | 7.19E+04 | 3.19E+04 | 8.39E+04 | Juglone [ C10 H6 O3, tgt= ]                                           |
| Isoferulic acid                   | 7.88E+05 | 1.47E+06 | 1.01E+06 | 1.44E+06 | Isoferulic acid [ C10 H10 O4, tgt=41.69, overall=41.69 ]              |
| Ferulic acid                      | 7.88E+05 | 1.47E+06 | 1.01E+06 | 1.44E+06 | Ferulic acid [ C10 H10 O4, tgt=41.69, overall=41.69 ]                 |
| 1,4-Naphtoquinone                 | 1.47E+05 | 1.60E+05 | 1.32E+05 | 1.42E+05 | 1,4-Naphtoquinone [ C10 H6 O2, tgt=25.55, overall=25.55 ]             |
| p-HPEA-AC                         | 1.03E+07 | 4.96E+06 | 3.90E+06 | 7.66E+06 | p-HPEA-AC [ C10 H12 O3, tgt=75.16, overall=75.16 ]                    |
| 2,3-Dihydroxy-1-guaiacylpropanone | 1.00E+00 | 1.00E+00 | 1.00E+00 | 1.68E+05 | 2,3-Dihydroxy-1-guaiacylpropanone [ C10 H12 O5, tgt= ]                |
| 3,4-DHPEA-AC                      | 2.17E+04 | 1.00E+00 | 5.09E+04 | 8.76E+04 | 3,4-DHPEA-AC [ C10 H12 O4, tgt= ]                                     |
| Homoveratric acid                 | 2.17E+04 | 1.00E+00 | 5.09E+04 | 8.76E+04 | Homoveratric acid [ C10 H12 O4, tgt= ]                                |
| Hydroxycaffeic acid               | 3.27E+05 | 3.75E+05 | 2.82E+05 | 3.41E+05 | Hydroxycaffeic acid [ C9 H8 O5, tgt=64.30, overall=64.30 ]            |
| Bergapten                         | 3.29E+04 | 1.00E+00 | 5.75E+04 | 1.00E+00 | Bergapten [ C12 H8 O4, tgt=28.58, overall=28.58 ]                     |
| Xanthotoxin                       | 3.29E+04 | 1.00E+00 | 5.75E+04 | 1.00E+00 | Xanthotoxin [ C12 H8 O4, tgt=28.58, overall=28.58 ]                   |

|                                     |          |          |          |          |                                                                            |
|-------------------------------------|----------|----------|----------|----------|----------------------------------------------------------------------------|
| Acetyl eugenol                      | 1.00E+00 | 6.88E+04 | 1.00E+00 | 1.00E+00 | Acetyl eugenol [ C12 H14 O3, tgt= ]                                        |
| Dihydrocaffeic acid                 | 1.27E+05 | 2.22E+05 | 1.49E+05 | 1.39E+05 | Dihydrocaffeic acid [ C9 H10 O4, tgt=47.21, overall=47.21 ]                |
| Syringaldehyde                      | 1.27E+05 | 2.22E+05 | 1.49E+05 | 1.39E+05 | Syringaldehyde [ C9 H10 O4, tgt=47.21, overall=47.21 ]                     |
| Homovanillic acid                   | 1.27E+05 | 2.22E+05 | 1.49E+05 | 1.39E+05 | Homovanillic acid [ C9 H10 O4, tgt=47.21, overall=47.21 ]                  |
| p-Coumaroyl glycolic acid           | 1.34E+05 | 1.30E+05 | 5.40E+04 | 1.00E+00 | p-Coumaroyl glycolic acid [ C11 H10 O5, tgt=39.33, overall=39.33 ]         |
| Sinapic acid                        | 1.00E+00 | 1.00E+00 | 1.36E+05 | 6.77E+04 | Sinapic acid [ C11 H12 O5, tgt= ]                                          |
| 4-Vinylsyringol                     | 1.01E+05 | 4.80E+04 | 8.90E+04 | 8.05E+04 | 4-Vinylsyringol [ C15 H14 O3, tgt=40.52, overall=40.52 ]                   |
| Resveratrol                         | 1.00E+00 | 5.17E+04 | 1.00E+00 | 2.77E+04 | Resveratrol [ C14 H12 O3, tgt= ]                                           |
| Formononetin                        | 1.00E+00 | 1.00E+00 | 1.00E+00 | 1.94E+04 | Formononetin [ C16 H12 O4, tgt= ]                                          |
| p-Coumaroyl tartaric acid           | 1.30E+06 | 1.11E+06 | 1.13E+06 | 1.06E+06 | p-Coumaroyl tartaric acid [ C13 H12 O8, tgt=20.72, overall=20.72 ]         |
| Sinapine                            | 1.00E+00 | 9.58E+04 | 1.30E+05 | 1.00E+00 | Sinapine [ C16 H24 N O5, tgt=47.47, overall=47.47 ]                        |
| Cirsimaritin                        | 6.68E+05 | 5.00E+05 | 5.42E+05 | 5.58E+05 | Cirsimaritin [ C17 H14 O6, tgt=46.03, overall=46.03 ]                      |
| Caffeoyl aspartic acid              | 1.49E+06 | 1.27E+06 | 1.28E+06 | 1.28E+06 | Caffeoyl aspartic acid [ C13 H13 N O7, tgt=42.01, overall=42.01 ]          |
| Avenanthramide 2c                   | 7.70E+04 | 1.66E+04 | 2.65E+04 | 3.89E+04 | Avenanthramide 2c [ C16 H13 N O6, tgt=45.18, overall=45.18 ]               |
| Avenanthramide K                    | 7.70E+04 | 1.66E+04 | 2.65E+04 | 3.89E+04 | Avenanthramide K [ C16 H13 N O6, tgt=45.18, overall=45.18 ]                |
| Hydroxytyrosol 4-O-glucoside        | 1.98E+06 | 3.98E+04 | 4.15E+06 | 2.75E+06 | Hydroxytyrosol 4-O-glucoside [ C14 H20 O8, tgt=25.58, overall=25.58 ]      |
| Nepetin                             | 2.65E+06 | 2.48E+06 | 2.38E+06 | 2.27E+06 | Nepetin [ C16 H12 O7, tgt=47.02, overall=47.02 ]                           |
| Isorhamnetin                        | 2.65E+06 | 2.48E+06 | 2.38E+06 | 2.27E+06 | Isorhamnetin [ C16 H12 O7, tgt=47.02, overall=47.02 ]                      |
| Rhamnetin                           | 2.65E+06 | 2.48E+06 | 2.38E+06 | 2.27E+06 | Rhamnetin [ C16 H12 O7, tgt=47.02, overall=47.02 ]                         |
| Kaempferide                         | 3.86E+05 | 1.00E+00 | 1.00E+00 | 9.97E+05 | Kaempferide [ C16 H11 O6, tgt=11.64, overall=11.64 ]                       |
| 4-Hydroxybenzoic acid 4-O-glucoside | 2.22E+05 | 5.39E+04 | 2.33E+04 | 5.36E+04 | 4-Hydroxybenzoic acid 4-O-glucoside [ C13 H16 O8, tgt=4.53, overall=4.53 ] |
| 6,8-Dihydroxykaempferol             | 7.14E+05 | 7.08E+05 | 6.97E+05 | 4.89E+05 | 6,8-Dihydroxykaempferol [ C15 H10 O8, tgt=6.28, overall=6.28 ]             |
| Myricetin                           | 7.14E+05 | 7.08E+05 | 6.97E+05 | 4.89E+05 | Myricetin [ C15 H10 O8, tgt=6.28, overall=6.28 ]                           |
| Quercetin                           | 5.35E+05 | 5.14E+05 | 8.47E+05 | 8.79E+05 | Quercetin [ C15 H10 O7, tgt=62.43, overall=62.43 ]                         |
| Morin                               | 5.35E+05 | 5.14E+05 | 8.47E+05 | 8.79E+05 | Morin [ C15 H10 O7, tgt=62.43, overall=62.43 ]                             |
| p-Coumaroyl malic acid              | 5.35E+05 | 5.14E+05 | 8.47E+05 | 8.79E+05 | p-Coumaroyl malic acid [ C13 H12 O7, tgt=82.60, overall=82.60 ]            |
| 6-Hydroxyluteolin                   | 5.35E+05 | 5.14E+05 | 8.47E+05 | 8.79E+05 | 6-Hydroxyluteolin [ C15 H10 O7, tgt=62.43, overall=62.43 ]                 |

|                            |          |          |          |          |                                                                  |
|----------------------------|----------|----------|----------|----------|------------------------------------------------------------------|
| Avenanthramide 2p          | 2.22E+05 | 5.21E+04 | 7.81E+04 | 9.21E+04 | Avenanthramide 2p [ C16 H13 N O5, tgt=4.15, overall=4.15 ]       |
| Hesperetin                 | 1.12E+06 | 8.74E+05 | 9.87E+05 | 1.21E+06 | Hesperetin [ C16 H14 O6, tgt=80.54, overall=80.54 ]              |
| 5-Pentadecylresorcinol     | 1.20E+06 | 1.05E+06 | 1.20E+06 | 7.61E+05 | 5-Pentadecylresorcinol [ C21 H36 O2, tgt=35.81, overall=35.81 ]  |
| 3,4-DHPEA-EDA              | 3.03E+06 | 2.91E+06 | 3.10E+06 | 2.95E+06 | 3,4-DHPEA-EDA [ C17 H20 O6, tgt=29.43, overall=29.43 ]           |
| Tetramethylscutellarein    | 9.04E+05 | 5.65E+05 | 8.61E+05 | 9.39E+05 | Tetramethylscutellarein [ C19 H18 O6, tgt=26.03, overall=26.03 ] |
| 5-Heptadecylresorcinol     | 5.35E+05 | 5.55E+05 | 6.31E+05 | 3.13E+05 | 5-Heptadecylresorcinol [ C23 H40 O2, tgt=18.73, overall=18.73 ]  |
| Carnosol                   | 1.00E+00 | 3.69E+04 | 1.00E+00 | 1.00E+00 | Carnosol [ C20 H26 O4, tgt= ]                                    |
| (+)-Galocatechin           | 1.01E+04 | 1.00E+00 | 2.46E+04 | 1.00E+00 | (+)-Galocatechin [ C15 H14 O7, tgt= ]                            |
| (-)-Epigallocatechin       | 1.01E+04 | 1.00E+00 | 2.46E+04 | 1.00E+00 | (-)-Epigallocatechin [ C15 H14 O7, tgt= ]                        |
| Carnosic acid              | 7.33E+05 | 9.04E+05 | 7.74E+05 | 7.06E+05 | Carnosic acid [ C20 H28 O4, tgt=62.23, overall=62.23 ]           |
| Gardenin B                 | 1.00E+00 | 1.00E+00 | 1.64E+06 | 3.39E+06 | Gardenin B [ C19 H18 O7, tgt=31.98, overall=31.98 ]              |
| Pinoresinol                | 9.41E+04 | 6.15E+04 | 1.11E+05 | 1.00E+00 | Pinoresinol [ C20 H22 O6, tgt=43.12, overall=43.12 ]             |
| Matairesinol               | 9.41E+04 | 6.15E+04 | 1.11E+05 | 1.00E+00 | Matairesinol [ C20 H22 O6, tgt=43.12, overall=43.12 ]            |
| Demethoxycurcumin          | 1.14E+05 | 3.97E+04 | 5.32E+04 | 1.68E+05 | Demethoxycurcumin [ C20 H18 O5, tgt=46.95, overall=46.95 ]       |
| Isolariciresinol           | 4.47E+04 | 5.36E+04 | 1.00E+00 | 4.72E+04 | Isolariciresinol [ C20 H24 O6, tgt=6.54, overall=6.54 ]          |
| Cyclolariciresinol         | 2.09E+05 | 2.57E+05 | 3.04E+05 | 2.62E+05 | Cyclolariciresinol [ C20 H24 O6, tgt=6.54, overall=6.54 ]        |
| Lariciresinol              | 2.09E+05 | 2.57E+05 | 3.04E+05 | 2.62E+05 | Lariciresinol [ C20 H24 O6, tgt=6.54, overall=6.54 ]             |
| 5-Caffeoylquinic acid      | 5.17E+05 | 3.40E+06 | 1.08E+06 | 9.05E+05 | 5-Caffeoylquinic acid [ C16 H18 O9, tgt=50.24, overall=50.24 ]   |
| 3-Caffeoylquinic acid      | 5.17E+05 | 3.40E+06 | 1.08E+06 | 9.05E+05 | 3-Caffeoylquinic acid [ C16 H18 O9, tgt=50.24, overall=50.24 ]   |
| 4-Caffeoylquinic acid      | 5.17E+05 | 3.40E+06 | 1.08E+06 | 9.05E+05 | 4-Caffeoylquinic acid [ C16 H18 O9, tgt=50.24, overall=50.24 ]   |
| Ferulic acid 4-O-glucoside | 1.00E+00 | 3.92E+05 | 9.00E+04 | 3.34E+05 | Ferulic acid 4-O-glucoside [ C16 H20 O9, tgt= ]                  |
| Feruloyl glucose           | 1.00E+00 | 3.92E+05 | 9.00E+04 | 3.34E+05 | Feruloyl glucose [ C16 H20 O9, tgt= ]                            |
| 5-Nonadecylresorcinol      | 1.00E+00 | 1.27E+05 | 1.00E+00 | 3.92E+05 | 5-Nonadecylresorcinol [ C25 H44 O2, tgt= ]                       |
| Rosmarinic acid            | 1.00E+00 | 1.00E+00 | 1.00E+00 | 1.80E+05 | Rosmarinic acid [ C18 H16 O8, tgt=44.45, overall=44.45 ]         |
| Arctigenin                 | 1.00E+00 | 1.23E+05 | 1.00E+00 | 6.48E+04 | Arctigenin [ C21 H24 O6, tgt=20.46, overall=20.46 ]              |
| Xanthohumol                | 1.00E+00 | 1.23E+05 | 1.00E+00 | 6.48E+04 | Xanthohumol [ C21 H22 O5, tgt=20.46, overall=20.46 ]             |
| Isoxanthohumol             | 1.00E+00 | 1.23E+05 | 1.00E+00 | 6.48E+04 | Isoxanthohumol [ C21 H22 O5, tgt=20.46, overall=20.46 ]          |
| Sinensetin                 | 1.58E+04 | 1.15E+06 | 5.73E+05 | 2.14E+05 | Sinensetin [ C20 H20 O7, tgt= ]                                  |
| 7-Oxomatairesinol          | 1.58E+04 | 1.15E+06 | 5.73E+05 | 2.14E+05 | 7-Oxomatairesinol [ C20 H20 O7, tgt= ]                           |

|                                          |          |          |          |          |                                                                                    |
|------------------------------------------|----------|----------|----------|----------|------------------------------------------------------------------------------------|
| Sesamolinol                              | 1.58E+04 | 1.15E+06 | 5.73E+05 | 2.14E+05 | Sesamolinol [ C20 H20 O7, tgt= ]                                                   |
| Tangeretin                               | 1.58E+04 | 1.15E+06 | 5.73E+05 | 2.14E+05 | Tangeretin [ C20 H20 O7, tgt= ]                                                    |
| 5-Heneicosylresorcinol                   | 1.00E+00 | 1.82E+05 | 1.00E+00 | 1.28E+05 | 5-Heneicosylresorcinol [ C27H48O2, tgt= ]                                          |
| 5-Heneicosenylresorcinol                 | 1.02E+05 | 1.20E+04 | 9.04E+04 | 5.30E+04 | 5-Heneicosenylresorcinol [ C27 H46 O2, tgt=16.25, overall=16.25 ]                  |
| 5-Tricosenylresorcinol                   | 3.26E+05 | 3.24E+05 | 4.35E+05 | 4.19E+05 | 5-Tricosenylresorcinol [ C29 H50 O2, tgt=42.57, overall=42.57 ]                    |
| Quercetin 3-O-xyloside                   | 1.00E+00 | 1.00E+00 | 1.00E+00 | 2.15E+04 | Quercetin 3-O-xyloside [ C20 H18 O11, tgt= ]                                       |
| Quercetin 3-O-arabinoside                | 1.00E+00 | 1.00E+00 | 1.00E+00 | 2.15E+04 | Quercetin 3-O-arabinoside [ C20 H18 O11, tgt= ]                                    |
| d-Viniferin                              | 1.60E+05 | 1.12E+04 | 1.33E+05 | 1.38E+05 | d-Viniferin [ C28 H22 O6, tgt=18.05, overall=18.05 ]                               |
| e-Viniferin                              | 1.60E+05 | 1.12E+04 | 1.33E+05 | 1.38E+05 | e-Viniferin [ C28 H22 O6, tgt=18.05, overall=18.05 ]                               |
| Pallidol                                 | 1.60E+05 | 1.12E+04 | 1.33E+05 | 1.38E+05 | Pallidol [ C28 H22 O6, tgt=18.05, overall=18.05 ]                                  |
| 3-Methoxynobiletin                       | 1.60E+05 | 1.12E+04 | 1.20E+05 | 1.37E+05 | 3-Methoxynobiletin [ C22 H24 O9, tgt=13.58, overall=13.58 ]                        |
| Phloridzin                               | 2.48E+05 | 2.23E+05 | 2.67E+05 | 1.20E+05 | Phloridzin [ C21 H24 O10, tgt=54.66, overall=54.66 ]                               |
| 6"-O-Acetyldaidzin                       | 2.02E+05 | 2.23E+05 | 2.67E+05 | 4.07E+04 | 6"-O-Acetyldaidzin [ C23 H22 O10, tgt=45.08, overall=45.08 ]                       |
| Petunidin 3-O-glucoside                  | 2.89E+04 | 2.41E+04 | 3.49E+04 | 1.00E+00 | Petunidin 3-O-glucoside [ C22 H23 O12, tgt= ]                                      |
| Petunidin 3-O-galactoside                | 2.89E+04 | 2.41E+04 | 3.49E+04 | 1.00E+00 | Petunidin 3-O-galactoside [ C22 H23 O12, tgt= ]                                    |
| Chrysoeriol 7-O-glucoside                | 2.27E+05 | 2.29E+05 | 2.60E+05 | 1.61E+05 | Chrysoeriol 7-O-glucoside [ C22 H22 O11, tgt=31.91, overall=31.91 ]                |
| Isorhamnetin 3-O-rutinoside              | 2.27E+05 | 2.29E+05 | 2.60E+05 | 1.61E+05 | Isorhamnetin 3-O-rutinoside [ C22 H22 O11, tgt=31.91, overall=31.91 ]              |
| 6"-O-Acetylglycitin                      | 1.19E+05 | 1.97E+05 | 1.78E+05 | 4.87E+04 | 6"-O-Acetylglycitin [ C24 H24 O11, tgt=10.63, overall=10.63 ]                      |
| Petunidin 3-O-rhamnoside                 | 8.03E+04 | 1.60E+05 | 1.49E+05 | 4.53E+04 | Petunidin 3-O-rhamnoside [ C22 H23 O10, tgt=10.34, overall=10.34 ]                 |
| 6"-O-Malonyldaidzin                      | 1.39E+05 | 1.34E+05 | 1.90E+05 | 6.25E+04 | 6"-O-Malonyldaidzin [ C24 H22 O12, tgt=48.38, overall=48.38 ]                      |
| Cyanidin 3-O-(6"-acetyl-glucoside)       | 1.94E+05 | 1.67E+05 | 3.33E+05 | 8.61E+04 | Cyanidin 3-O-(6"-acetyl-glucoside) [ C23 H23 O12, tgt=12.87, overall=12.87 ]       |
| Cyanidin 3-O-(6"-acetyl-galactoside)     | 1.94E+05 | 1.67E+05 | 3.33E+05 | 8.61E+04 | Cyanidin 3-O-(6"-acetyl-galactoside) [ C23 H23 O12, tgt=12.87, overall=12.87 ]     |
| Malvidin 3-O-(6"-acetyl-galactoside)     | 8.74E+05 | 7.77E+05 | 8.56E+05 | 8.37E+05 | Malvidin 3-O-(6"-acetyl-galactoside) [ C25 H27 O13, tgt=18.24, overall=18.24 ]     |
| Malvidin 3-O-(6"-acetyl-glucoside)       | 8.74E+05 | 7.77E+05 | 8.56E+05 | 8.37E+05 | Malvidin 3-O-(6"-acetyl-glucoside) [ C25 H27 O13, tgt=18.24, overall=18.24 ]       |
| Jaceidin 4'-O-glucuronide                | 1.66E+05 | 2.43E+05 | 2.08E+05 | 2.07E+05 | Jaceidin 4'-O-glucuronide [ C24 H24 O14, tgt=47.28, overall=47.28 ]                |
| Pelargonidin 3-O-(6"-succinyl-glucoside) | 6.75E+04 | 2.00E+05 | 8.09E+04 | 5.88E+04 | Pelargonidin 3-O-(6"-succinyl-glucoside) [ C25 H25 O13, tgt=13.08, overall=13.08 ] |

|                                         |          |          |          |          |                                                                                   |
|-----------------------------------------|----------|----------|----------|----------|-----------------------------------------------------------------------------------|
| Procyanidin dimer B2                    | 6.05E+05 | 2.03E+05 | 5.67E+05 | 2.92E+05 | Procyanidin dimer B2 [ C30 H26 O12, tgt=31.42, overall=31.42 ]                    |
| Procyanidin dimer B1                    | 6.05E+05 | 2.03E+05 | 5.67E+05 | 2.92E+05 | Procyanidin dimer B1 [ C30 H26 O12, tgt=31.42, overall=31.42 ]                    |
| Procyanidin dimer B4                    | 6.05E+05 | 2.03E+05 | 5.67E+05 | 2.92E+05 | Procyanidin dimer B4 [ C30 H26 O12, tgt=31.42, overall=31.42 ]                    |
| Procyanidin dimer B3                    | 6.05E+05 | 2.03E+05 | 5.67E+05 | 2.92E+05 | Procyanidin dimer B3 [ C30 H26 O12, tgt=31.42, overall=31.42 ]                    |
| Procyanidin dimer B5                    | 6.05E+05 | 2.03E+05 | 5.67E+05 | 2.92E+05 | Procyanidin dimer B5 [ C30 H26 O12, tgt=31.42, overall=31.42 ]                    |
| Procyanidin dimer B7                    | 6.05E+05 | 2.03E+05 | 5.67E+05 | 2.92E+05 | Procyanidin dimer B7 [ C30 H26 O12, tgt=31.42, overall=31.42 ]                    |
| Vitisin A                               | 7.13E+05 | 1.55E+05 | 6.65E+05 | 3.05E+05 | Vitisin A [ C26 H25 O14, tgt=81.51, overall=81.51 ]                               |
| Luteolin 7-O-(2-apiosyl-glucoside)      | 7.24E+05 | 1.55E+05 | 6.83E+05 | 3.05E+05 | Luteolin 7-O-(2-apiosyl-glucoside) [ C26 H28 O15, tgt=65.08, overall=65.08 ]      |
| Kaempferol 3-O-xylosyl-glucoside        | 7.24E+05 | 1.55E+05 | 6.83E+05 | 3.05E+05 | Kaempferol 3-O-xylosyl-glucoside [ C26 H28 O15, tgt=65.08, overall=65.08 ]        |
| 24-Methylcholestanol ferulate           | 4.53E+05 | 4.71E+05 | 5.90E+05 | 3.54E+05 | 24-Methylcholestanol ferulate [ C38 H58 O4, tgt=37.87, overall=37.87 ]            |
| Stigmastanol ferulate                   | 1.78E+06 | 1.70E+06 | 1.97E+06 | 1.32E+06 | Stigmastanol ferulate [ C39 H60 O4, tgt=13.92, overall=13.92 ]                    |
| Schottenol ferulate                     | 1.40E+06 | 1.75E+06 | 2.23E+06 | 1.12E+06 | Schottenol ferulate [ C39 H58 O4, tgt=49.25, overall=49.25 ]                      |
| Sitosterol ferulate                     | 1.40E+06 | 1.75E+06 | 2.23E+06 | 1.12E+06 | Sitosterol ferulate [ C39 H58 O4, tgt=49.25, overall=49.25 ]                      |
| 24-Methylcholesterol ferulate           | 1.04E+05 | 1.00E+00 | 4.04E+04 | 1.00E+00 | 24-Methylcholesterol ferulate [ C38 H56 O4, tgt=40.33, overall=40.33 ]            |
| 24-Methylenecholestanol ferulate        | 1.04E+05 | 1.00E+00 | 4.04E+04 | 1.00E+00 | 24-Methylenecholestanol ferulate [ C38 H56 O4, tgt=40.33, overall=40.33 ]         |
| 24-Methylthosterol ferulate             | 2.63E+07 | 1.01E+08 | 4.42E+07 | 7.39E+07 | 24-Methylthosterol ferulate [ C38 H56 O4, tgt=40.33, overall=40.33 ]              |
| Peonidin 3-O-rutinoside                 | 1.57E+06 | 1.38E+06 | 2.65E+06 | 2.29E+06 | Peonidin 3-O-rutinoside [ C28 H33 O15, tgt=9.96, overall=9.96 ]                   |
| Neodiosmin                              | 1.41E+06 | 1.27E+06 | 1.92E+06 | 1.71E+06 | Neodiosmin [ C28 H32 O15, tgt=46.88, overall=46.88 ]                              |
| Diosmin                                 | 1.41E+06 | 1.27E+06 | 1.92E+06 | 1.71E+06 | Diosmin [ C28 H32 O15, tgt=46.88, overall=46.88 ]                                 |
| Neohesperidin                           | 7.52E+05 | 6.63E+05 | 1.12E+06 | 1.68E+06 | Neohesperidin [ C28 H34 O15, tgt=71.29, overall=71.29 ]                           |
| Hesperidin                              | 7.52E+05 | 6.63E+05 | 1.12E+06 | 1.68E+06 | Hesperidin [ C28 H34 O15, tgt=71.29, overall=71.29 ]                              |
| Pigment A                               | 6.26E+05 | 5.90E+05 | 9.85E+05 | 9.62E+05 | Pigment A [ C31 H29 O13, tgt=20.00, overall=20.00 ]                               |
| Peonidin 3-O-(6"-p-coumaroyl-glucoside) | 6.26E+05 | 5.90E+05 | 9.85E+05 | 9.62E+05 | Peonidin 3-O-(6"-p-coumaroyl-glucoside) [ C31 H29 O13, tgt=20.00, overall=20.00 ] |
| Delphinidin 3,5-O-diglucoside           | 6.27E+05 | 5.90E+05 | 9.87E+05 | 1.03E+06 | Delphinidin 3,5-O-diglucoside [ C27 H31 O17, tgt=70.44, overall=70.44 ]           |

|                                                       |          |          |          |          |                                                                                                 |
|-------------------------------------------------------|----------|----------|----------|----------|-------------------------------------------------------------------------------------------------|
| Delphinidin 3-O-glucosyl-glucoside                    | 6.27E+05 | 5.90E+05 | 9.87E+05 | 1.03E+06 | Delphinidin 3-O-glucosyl-glucoside [ C27 H31 O17, tgt=70.44, overall=70.44 ]                    |
| Delphinidin 3-O-(6"-p-coumaroyl-glucoside)            | 6.81E+05 | 6.44E+05 | 1.11E+06 | 1.15E+06 | Delphinidin 3-O-(6"-p-coumaroyl-glucoside) [ C30 H27 O14, tgt=20.70, overall=20.70 ]            |
| Cyanidin 3-O-(6"-caffeoyl-glucoside)                  | 6.81E+05 | 6.44E+05 | 1.11E+06 | 1.15E+06 | Cyanidin 3-O-(6"-caffeoyl-glucoside) [ C30 H27 O14, tgt=20.70, overall=20.70 ]                  |
| Prodelphinidin dimer B3                               | 7.48E+05 | 7.07E+05 | 1.19E+06 | 1.25E+06 | Prodelphinidin dimer B3 [ C30 H26 O14, tgt=20.70, overall=20.70 ]                               |
| Quercetin 3-O-galactoside 7-O-rhamnoside              | 6.76E+05 | 6.13E+05 | 1.19E+06 | 1.25E+06 | Quercetin 3-O-galactoside 7-O-rhamnoside [ C27H30O16, tgt= ]                                    |
| Kaempferol 3-O-sophoroside                            | 6.76E+05 | 6.13E+05 | 1.19E+06 | 1.25E+06 | Kaempferol 3-O-sophoroside [ C27H30O16, tgt= ]                                                  |
| Quercetin 3-O-rutinoside                              | 6.76E+05 | 6.13E+05 | 1.19E+06 | 1.25E+06 | Quercetin 3-O-rutinoside [ C27H30O16, tgt= ]                                                    |
| Quercetin 3-O-rhamnosyl-galactoside                   | 6.76E+05 | 6.13E+05 | 1.19E+06 | 1.25E+06 | Quercetin 3-O-rhamnosyl-galactoside [ C27H30O16, tgt= ]                                         |
| Kaempferol 3,7-O-diglucoside                          | 6.76E+05 | 6.13E+05 | 1.19E+06 | 1.25E+06 | Kaempferol 3,7-O-diglucoside [ C27H30O16, tgt= ]                                                |
| Delphinidin 3-O-rutinoside                            | 7.40E+05 | 8.57E+05 | 7.94E+05 | 1.12E+06 | Delphinidin 3-O-rutinoside [ C27 H31 O16, tgt=60.01, overall=60.01 ]                            |
| Cyanidin 3,5-O-diglucoside                            | 7.40E+05 | 8.36E+05 | 7.94E+05 | 1.12E+06 | Cyanidin 3,5-O-diglucoside [ C27 H31 O16, tgt=60.01, overall=60.01 ]                            |
| Cyanidin 3-O-sophoroside                              | 7.40E+05 | 8.36E+05 | 7.94E+05 | 1.12E+06 | Cyanidin 3-O-sophoroside [ C27 H31 O16, tgt=60.01, overall=60.01 ]                              |
| Verbascoside                                          | 3.25E+05 | 2.21E+05 | 3.44E+05 | 2.78E+05 | Verbascoside [ C29 H36 O15, tgt=40.60, overall=40.60 ]                                          |
| Isorhamnetin 3-O-glucoside 7-O-rhamnoside             | 1.44E+05 | 7.46E+04 | 1.36E+05 | 9.84E+04 | Isorhamnetin 3-O-glucoside 7-O-rhamnoside [ C28 H32 O16, tgt=35.69, overall=35.69 ]             |
| Pelargonidin 3,5-O-diglucoside                        | 4.84E+04 | 3.38E+04 | 1.34E+05 | 1.31E+05 | Pelargonidin 3,5-O-diglucoside [ C27 H31 Cl O15, tgt= ]                                         |
| Apigenin 7-O-(6"-malonyl-apiosyl-glucoside)           | 1.00E+00 | 1.00E+00 | 3.32E+04 | 8.86E+04 | Apigenin 7-O-(6"-malonyl-apiosyl-glucoside) [ C29 H30 O17, tgt= ]                               |
| Malvidin 3-O-(6"-caffeoyl-glucoside)                  | 3.26E+05 | 3.07E+05 | 3.90E+05 | 1.26E+05 | Malvidin 3-O-(6"-caffeoyl-glucoside) [ C32 H31 O15, tgt=18.45, overall=18.45 ]                  |
| Kaempferol 3-O-(6"-acetyl-galactoside) 7-O-rhamnoside | 2.70E+05 | 2.62E+05 | 3.92E+05 | 1.30E+05 | Kaempferol 3-O-(6"-acetyl-galactoside) 7-O-rhamnoside [ C29 H32 O16, tgt=62.68, overall=62.68 ] |
| Malvidin 3,5-O-diglucoside                            | 3.26E+05 | 3.07E+05 | 4.72E+05 | 1.51E+05 | Malvidin 3,5-O-diglucoside [ C29 H35 O17, tgt=61.00, overall=61.00 ]                            |
| Cyanidin 3-O-glucosyl-rutinoside                      | 7.68E+05 | 3.94E+05 | 1.08E+06 | 7.13E+05 | Cyanidin 3-O-glucosyl-rutinoside [ C33 H41 O20, tgt=10.06, overall=10.06 ]                      |
| Quercetin 3-O-rhamnosyl-rhamnosyl-glucoside           | 5.59E+05 | 2.80E+05 | 7.83E+05 | 5.17E+05 | Quercetin 3-O-rhamnosyl-rhamnosyl-glucoside [ C33 H40 O20, tgt=18.38, overall=18.38 ]           |
| Kaempferol 3-O-glucosyl-rhamnosyl-glucoside           | 5.59E+05 | 2.80E+05 | 7.83E+05 | 5.17E+05 | Kaempferol 3-O-glucosyl-rhamnosyl-glucoside [ C33 H40 O20, tgt=18.38, overall=18.38 ]           |

|                                       |          |          |          |          |                                                                                 |
|---------------------------------------|----------|----------|----------|----------|---------------------------------------------------------------------------------|
| 1-Sinapoyl-2,2'-diferuloylgentiobiose | 3.01E+05 | 3.11E+05 | 4.80E+05 | 3.88E+05 | 1-Sinapoyl-2,2'-diferuloylgentiobiose [ C43 H48 O21, tgt=56.35, overall=56.35 ] |
| Spinacetin 3-O-(2                     | 8.75E+05 | 8.18E+05 | 1.01E+06 | 1.00E+06 | Spinacetin 3-O-(2 [ C44 H50 O25, tgt=30.97, overall=30.97 ]                     |
| 1,2,2'-Trisinapoylgentiobiose         | 3.20E+05 | 2.99E+05 | 3.73E+05 | 3.73E+05 | 1,2,2'-Trisinapoylgentiobiose [ C45 H52 O23, tgt=14.82, overall=14.82 ]         |
