# Supplementary material for: Foliar and Root Comparative Metabolomics and Phenolic Profiling of Micro-Tom Tomato (Solanum lycopersicum L.) Plants Associated with a Gene Expression Analysis in Response to Short Daily UV Treatments
Source: Plants (Basel). 2022 Jul 12;11(14):1829. doi: 10.3390/plants11141829 (PMC9319050; doi:10.3390/plants11141829)
Supplement: Supplementary file 1 [file plants-11-01829-s001.zip]

Archive with 6 entries (6 files):
- Fig S1.pdf
- Table S1 primers.pdf
- table S2_dataset_revised 2.xlsx
- Table S3 - Volcano Leaves and Roots.xlsx
- Table S4 - dataset phenolics leaves.pdf
- Table S5- dataset phenolics roots.pdf
