# Supplementary material for: Foliar and Root Comparative Metabolomics and Phenolic Profiling of Micro-Tom Tomato (Solanum lycopersicum L.) Plants Associated with a Gene Expression Analysis in Response to Short Daily UV Treatments
Source: Plants (Basel). 2022 Jul 12;11(14):1829. doi: 10.3390/plants11141829 (PMC9319050; doi:10.3390/plants11141829)
Supplement: Supplementary file 1 [file plants-11-01829-s001.zip › table S2_dataset_revised 2.xlsx]

## Sheet: Leaves
	Average Abundance
Compound	CTR-11d	CTR-REC	UV-11d	UV-rec	Annotations			CompositeSpectrum (mass-abundance combinations)
3-methyl-4-<i>cis</i>-hydroxy-2-butenal / 3-methyl-4-<i>trans</i>-hydroxy-2-butenal	526825	719589	184539	696993	CPD-4482 [ C5 H8 O2, tgt=43.57, overall=43.57 ]			(100.05364, 17280.738)(104.07045, 5332.347)(118.08543, 6014.2373)
(E)-2-hexenal / (Z)-3-hexanal / <i>trans</i>-4-hexen-3-one	9.53007e+06	7.37181e+06	1.09086e+07	9.04939e+06	TRANS-2-HEXENAL [ C6 H10 O, tgt=67.67, overall=67.67 ]			(100.075386, 276.794)(116.10609, 967.7292)(121.0644, 316808.2)(122.06738, 23891.232)(123.068634, 1097.7533)(103.05356, 17872.436)(104.057274, 1889.4583)
CDP-1-18:1(9Z)-2-18:1(9Z)-glycerol	1.03813e+06	719736	1.64111e+06	1.28188e+06	CPDQT-516 [ C48 H83 N3 O15 P2, tgt=57.01, overall=57.01 ]			(1004.53046, 16433.967)(1005.53326, 6646.088)(1006.5344, 573.495)(1004.53186, 37521.977)(1005.53436, 17644.34)(1006.53595, 4067.1626)(1032.5242, 8785.107)(1033.5271, 2652.1965)
3-nitrilo-L-alanine	15731.9	13090.1	30775.4	1	CPD0-1336 [ C3 H3 N2 O2, tgt= ]			(101.02607, 8713.322)
(<i>R</i>)-methylmalonate-semialdehyde / (<i>S</i>)-methylmalonate-semialdehyde / 2-oxobutanoate/ acetoacetate / succinate semialdehyde	125119	112742	112291	119253	CPD-12177 [ C4 H5 O3, tgt=47.60, overall=47.60 ]			(101.02612, 8742.075)(107.043236, 25242.982)(105.05426, 655.81433)(127.02378, 1134719.2)(128.02509, 184488.78)(129.02182, 152140.34)
L-cycloserine	778206	882489	201570	456220	CPD-2483 [ C3 H7 N2 O2, tgt=70.69, overall=70.69 ]			(103.05325, 20316.639)(104.0569, 686.81)(104.05762, 1145.6156)(121.08293, 40183.65)(122.0932, 6427.76)(130.66367, 3368.986)
1-aminocyclopropane-1-carboxylate / azetidine-2-carboxylate	119351	104124	33098.9	41451	CPD-68 [ C4 H7 N O2, tgt=26.91, overall=26.91 ]			(103.05353, 12452.476)(102.05427, 690.82)(124.038574, 7965.3994)(110.0341, 676.49)
3-aminobutanoate	1	1	30788.1	1	CPD-4748 [ C4 H9 N O2, tgt=46.84, overall=46.84 ]			(104.0703, 10394.58)(112.0491, 220.34)
tris	1	1	53766.2	1	TRIS [ C4 H12 N O3, tgt= ]			(104.070465, 8149.4263)(142.1213, 3801.24)(147.07513, 2851.89)
diacetyl	1	1	50561.1	1	DIACETYL [ C4 H6 O2, tgt= ]			(104.070496, 9131.65)(113.0336, 5238.3047)
ethyl propanoate	130551	45618	259411	63558.9	CPD-19958 [ C5 H10 O2, tgt=44.41, overall=44.41 ]			(104.07065, 2045.2926)(112.061844, 1233.0475)
propyl acetate	1	1	1	63558.9	CPD-18998 [ C5H10O2, tgt= ]			(104.0708, 3421.28)(112.062, 1169.5)
(3Z)-hex-3-en-1-ol / (E)-2-hexenol / 1-hexanal / 4-methylpentanal / hexan-3-one	114814	1	153012	131230	CIS-3-HEXENOL [ C6 H12 O, tgt=32.82, overall=32.82 ]			(104.1062, 1154.3987)(105.069084, 11804.347)
(<i>E</i>)-2-pentenol / 1-pentan-3-one / 3-methyl-2-butanone / 3-methylbutanal / isoprenyl alcohol	38012500	35750000	40712500	36475000	CPD-13229 [ C5 H10 O, tgt=99.00, overall=99.00 ]			(104.10687, 983526.4)(105.10976, 45314.76)(106.11134, 1356.2849)
choline	39337500	36362500	42012500	38112500	CHOLINE [ C5 H14 N O, tgt=99.00, overall=99.00 ]			(104.10687, 988600.25)(105.10976, 45546.3)(106.11134, 1383.825)
avenacin A-2	2834434	2.29188e+06	2.59023e+06	1.08085e+06	CPD-16599 [ C54 H80 O21, tgt=53.32, overall=53.32 ]			(1049.0957, 1291.6218)(1049.5302, 1009.02826)(1051.5334, 407.34)(1052.1913, 1193.0582)(1051.8628, 1823.9467)(1054.5059, 1637.12)(1064.5532, 63896.727)(1065.5554, 32457.7)(1066.5571, 9288.99)(1067.5581, 1362.0157)
2-phenylethanol	156530	169952	149351	213024	CPD-7035 [ C8 H10 O, tgt=43.01, overall=43.01 ]			(105.06905, 12413.986)(122.095345, 1476.8871)
delphinidin 3-<i>O</i>-rutinoside-7-<i>O</i>-(6-<i>O</i>-(4-<i>O</i>-(glucosyl)-oxybenzoyl)-glucoside)	4.60364e+06	5.11669e+06	4.79267e+06	4.53358e+06	CPD-16560 [ C46H54O28, tgt= ]			(1054.2866, 29077.428)(1055.2875, 30374.824)(1059.2809, 2521.5693)(1060.2767, 269.58)
(2E,11Z,14Z,17Z)-icosatetraenoyl-CoA / (2E,8Z,11Z,14Z)-icosatetraenoyl-CoA / (8Z,11Z,14Z,17Z)-icosatetraenoyl-CoA / juniperonoyl-CoA	2100121	2.01679e+06	2146787	1.55337e+06	CPD-14420 [ C41 H62 N7 O17 P3 S, tgt=25.47, overall=25.47 ]			(1054.2905, 26788.885)(1055.2915, 27956.049)(1054.286, 29299.484)(1055.2869, 30620.7)
3-oxo-2-(cis-2'-pentenyl)-cyclopentane-1-(3-oxooctanoyl)-CoA	3.47685e+06	3.33716e+06	3.55283e+06	2.94706e+06	CPD-11520 [ C39 H58 N7 O19 P3 S, tgt=22.06, overall=22.06 ]			(1054.2909, 28366.15)(1055.2919, 29580.18)(1056.2905, 28667.08)(1057.2897, 16078.31)(1058.2878, 7545.42)(1059.2856, 2376.49)(1054.2864, 30457.883)(1055.2874, 31835.146)(1056.286, 30869.621)(1057.285, 17803.045)(1058.2834, 8179.0054)(1059.2809, 2691.1965)(1060.2767, 284.65)
3-oxo-2-(cis-2'-pentenyl)-cyclopentane-1-(E-octa-2-enoyl)-CoA	542415	263998	862912	1	CPD-11518 [ C39 H58 N7 O18 P3 S, tgt=2.78, overall=2.78 ]			(1055.2865, 32530.352)(1060.2767, 264.63165)
(2E,7Z,10Z,13Z,16Z,19Z)-docosahexaenoyl-CoA	2.31604e+06	2577726	2.36936e+06	1.9691e+06	CPD-14425 [ C43H62N7O17P3S, tgt= ]			(1055.2875, 31657.283)(1056.2863, 30685.342)(1057.2853, 17716.088)(1058.283, 8064.06)(1059.2814, 2560.1235)(1060.2751, 329.59)
&omega;-carboxy-(9<i>Z</i>)-octadec-9-enoyl-CoA	3.47959e+06	3.34591e+06	3.55926e+06	2549030	CPD-17624 [ C39 H61 N7 O19 P3 S, tgt=13.14, overall=13.14 ]			(1056.2845, 32888.418)(1057.2834, 19195.129)(1058.282, 8670.059)(1059.2797, 2772.625)(1060.2751, 352.32)(1056.2894, 30636.605)(1057.2886, 17538.303)(1058.287, 7501.197)(1059.2845, 2392.2302)
3-oxo-2-(cis-2'-pentenyl)-cyclopentane-1-(3R-hydroxyoctanoyl)-CoA	4.79294e+06	4.60934e+06	4.90431e+06	4.09257e+06	CPD-11519 [ C39 H60 N7 O19 P3 S, tgt=13.12, overall=13.12 ]			(1056.2861, 30338.584)(1057.2852, 17438.932)(1058.283, 7838.8613)(1059.2814, 2472.779)(1060.2751, 319.29)(1055.2875, 31288.176)(1060.277, 265.78598)
10,16-dihydroxypalmitoyl-CoA / sciadonoyl-CoA	1.60934e+06	1.54692e+06	1645107	1.36947e+06	CPD-17627 [ C37 H62 N7 O19 P3 S, tgt=19.17, overall=19.17 ]			(1056.2861, 31583.959)(1057.285, 18303.99)(1058.2831, 8280.586)(1059.2814, 2633.4717)(1060.2751, 340.57)
(7Z,10Z,13Z,16Z,19Z)-docosapentaenoyl-CoA	1	339104	1	767078	CPD-14426 [ C43 H64 N7 O17 P3 S, tgt= ]			(1057.2886, 19662.432)(1058.2867, 9586.187)(1059.2845, 3019.6956)(1060.2798, 214.01)
des-methyl avenacin A-1	341649	249920	333363	263144	CPD-16624 [ C54 H81 N O21, tgt=29.64, overall=29.64 ]			(1062.5364, 14657.087)(1063.5391, 7224.7188)(1064.5421, 1870.5802)(1065.6067, 1651.0524)(1066.5342, 1944.8925)(1068.5444, 406.83)
D-serine	57147.4	564303	176942	62676.2	D-SERINE [ C3 H7 N O3, tgt=18.15, overall=18.15 ]			(107.043526, 23058.35)(132.04366, 1224.1238)(113.0263, 476.94)
L-serine	127841	564303	275084	1040770	SER [ C3 H7 N O3, tgt=18.15, overall=18.15 ]			(107.04359, 18921.578)(105.0689, 10204.62)(132.04361, 1463.8501)(113.0263, 476.94)
orcinol	244307	350758	443052	413347	ORCINOL-CPD [ C7 H8 O2, tgt=47.31, overall=47.31 ]			(107.04375, 10238.673)(112.0618, 3346.5364)(142.08534, 4790.0317)(124.07488, 2080.35)(147.97856, 7153.9917)(132.0428, 1888.69)
benzaldehyde	173782	150416	181474	1	BENZALDEHYDE [ C7 H6 O, tgt=41.86, overall=41.86 ]			(107.04384, 17191.559)(112.06208, 3827.8516)(124.074486, 3825.5093)(132.0428, 1888.69)
guaiacol / salicyl alcohol	215165	288974	1	413347	CPD-400 [ C7 H8 O2, tgt=47.31, overall=47.31 ]			(107.044205, 7701.058)(142.08534, 4790.0317)(124.07488, 2080.35)(149.38362, 3081.305)
benzyl alcohol	128492	125520	116908	128229	BENZYL-ALCOHOL [ C7H8O, tgt= ]			(108.34576, 1161.9286)(110.0652, 950.3)(134.89072, 206182.67)(132.04343, 1087.013)(113.033646, 8652.281)
(5Z,8Z,11Z,14Z,17Z)-3-oxodocosapentaenoyl-CoA	484045	580613	348501	241318	CPD-14423 [ C43H62N7O18P3S, tgt= ]			(1090.3458, 10824.5)(1090.3475, 17649.05)(1091.3494, 1359.1693)
(3R)-hydroxydihomo &gamma;-linolenoyl-CoA	251723	298521	126224	125589	CPD-14405 [ C41 H64 N7 O18 P3 S, tgt=11.69, overall=11.69 ]			(1090.3478, 18782.326)(1091.3494, 1375.2294)(1090.3461, 11451.79)
(3R)-hydroxy-auricoloyl-CoA / 3-oxo-lesqueroloyl-CoA	312814	287659	192217	326098	CPD-17402 [ C41 H66 N7 O19 P3 S, tgt=44.49, overall=44.49 ]			(1090.3485, 11982.517)(1090.346, 12179.07)(1090.3473, 14303.926)(1091.3467, 1133.3271)
3-fluorobenzaldehyde	1.06723e+06	223214	606176	791250	CPD-8780 [ C7 H5 F O, tgt=46.94, overall=46.94 ]			(110.0337, 477.47)(111.04319, 5985.2637)(112.04915, 674.595)(147.022, 17195.074)
(<i>R</i>)-glycerate	1	124585	1	228704	GLYCERATE [ C3 H5 O4, tgt=45.82, overall=45.82 ]			(110.033905, 313.195)(123.053856, 11353.668)(107.04351, 1375.5375)
aureobasidin A	26691.8	1	33575.2	1	CPD-14755 [ C60 H92 N8 O11, tgt= ]			(1105.7043, 2523.226)(1106.7069, 566.32)(1100.7445, 3505.2937)(1101.7468, 770.31995)
2-furoate / 2-oxopenta-3,4-dienoate	1	93230.6	105768	73960.4	2-FUROATE [ C5 H3 O3, tgt= ]			(111.00679, 6895.011)(130.04848, 18307.607)(113.03369, 8372.612)
thymine	1.33306e+06	1.0174e+06	1.36569e+06	1.25441e+06	THYMINE [ C5 H6 N2 O2, tgt=52.12, overall=52.12 ]			(111.04328, 6632.754)(144.07973, 55872.164)(145.083, 4558.5225)
catechol	1.31196e+06	404698	392623	403387	CATECHOL [ C6 H6 O2, tgt=44.69, overall=44.69 ]			(111.043335, 5925.9497)(129.57631, 280.76373)(112.062256, 597.708)(116.65532, 2855.5005)
2-formylpyridine	120294	81666.5	89933.4	96967	CPD-19751 [ C6 H5 N O, tgt=48.06, overall=48.06 ]			(111.04392, 2108.2073)(128.14421, 2184.4456)(110.065155, 657.855)(130.02357, 7536.441)
<i>N</i>-ethylmaleimide	120294	81666.5	89933.4	96967	N-ETHYLMALEIMIDE [ C6 H7 N O2, tgt=48.06, overall=48.06 ]			(111.04392, 2108.2073)(128.14421, 2184.4456)(130.02357, 7536.441)
uracil	1	19746.2	25993.4	1	URACIL [ C4 H4 N2 O2, tgt= ]			(113.03345, 11832.53)(112.04915, 565.635)
gentiodelphin	1.8358e+06	1700709	1.83935e+06	1528301	CPD-7965 [ C51 H52 O28, tgt=51.50, overall=51.50 ]			(1130.3046, 34096.043)(1131.304, 21028.596)(1132.3054, 9142.605)(1133.3032, 3047.4631)
L-&alpha;-(methylenecyclopropyl)-glycine	232246	290626	1	252403	CPD-9757 [ C6 H9 N O2, tgt=65.84, overall=65.84 ]			(114.06564, 263.205)(132.10104, 111041.695)(150.40263, 12594.309)(153.0558, 1344.24)
glycerol	1	66149	1	1	GLYCEROL [ C3 H8 O3, tgt=41.81, overall=41.81 ]			(114.0909, 142.59)(115.0387, 14816.93)
fumarate / maleate	237190	317698	335585	309626	FUM [ C4 H2 O4, tgt=32.60, overall=32.60 ]			(114.516815, 20829.285)(137.99025, 1752.4506)
dimethyl thiosulfinate	1.9286e+06	1.35361e+06	2.0414e+06	1	CPD-17445 [ C2 H6 O S2, tgt=47.61, overall=47.61 ]			(114.98283, 744.41)(129.02142, 142652.78)(110.007904, 9468.809)(111.0097, 327.54)
(<i>E</i>)-glutaconate	2341041	1.85363e+06	2.34249e+06	1.36042e+06	GLUTACONATE [ C5 H4 O4, tgt=52.00, overall=52.00 ]			(115.0121, 4234.065)(129.11513, 114760.4)(130.02336, 7208.5654)(113.54559, 19304.527)(115.0141, 3657.8738)(150.05621, 3924.2998)(131.04385, 9548.924)(132.04327, 1024.1147)(153.0087, 1989.435)(154.00807, 378.9)
5-fluorouracil	107596	90362.4	111574	73511.8	CPD0-1327 [ C4 H3 F N2 O2, tgt=72.17, overall=72.17 ]			(115.05118, 4180.42)(116.01325, 2936.9082)(114.01556, 22718.555)(131.04387, 9554.483)(132.04323, 1004.22156)(153.00879, 2167.191)(154.00807, 408.04333)
2-iminosuccinate	85837.2	373224	254574	141260	IMINOASPARTATE [ C4 H3 N O4, tgt=59.21, overall=59.21 ]			(115.32467, 4697.5693)(116.01318, 3365.8928)(137.99043, 2165.937)
3-oxocerotoyl-CoA	81924.1	1	1	1	CPD-14274 [ C47 H80 N7 O18 P3 S, tgt=4.39, overall=4.39 ]			(1158.4409, 204.56)(1156.4958, 10584.88)
(2S)-2-amino-4-pentenoate / L-proline	6279617	7.36062e+06	8.08934e+06	9.61906e+06	CPD-19411 [ C5 H9 N O2, tgt=80.91, overall=80.91 ]			(116.06975, 19628.918)(117.0731, 1002.02)(138.05428, 188612.6)(139.05717, 13700.004)(123.04855, 2085.3877)
5,6-dihydrouracil	37360	128276	1	1	DI-H-URACIL [ C4 H6 N2 O2, tgt=14.75, overall=14.75 ]			(116.3887, 276.65)(132.07933, 2612.2366)
(<i>E</i>)-phenylacetaldehyde oxime / (<i>Z</i>)-phenylacetaldehyde oxime / <i>N</i>-benzylformamide / 2-phenylacetamide	136289	255571	343212	279768	CPD-13031 [ C8 H9 N O, tgt=75.02, overall=75.02 ]			(117.05687, 1090.4075)(118.06431, 14022.57)(119.067566, 634.93335)(136.0733, 880.97)(137.09485, 712.9175)
indole	136289	234153	118992	1	INDOLE [ C8 H7 N, tgt=75.02, overall=75.02 ]			(117.05687, 1093.9812)(118.06421, 18915.322)(119.067566, 634.93335)(137.09465, 563.18)
phenylacetonitrile	136289	234153	118992	52036.2	PHENYLACETONITRILE [ C8 H7 N, tgt=75.02, overall=75.02 ]			(117.05687, 1093.9812)(118.06427, 17613.176)(119.067566, 634.93335)(137.09485, 821.39)
butyl acetate	10314708	8686291	1.10652e+07	10845781	CPD-13346 [ C6 H12 O2, tgt=67.35, overall=67.35 ]			(118.08525, 1255.9637)(100.0752, 234.34)(116.1061, 1002.8167)(140.07951, 486.034)(121.064415, 369084.03)(122.06737, 28033.947)(123.068634, 1136.7999)
2-hydroxypurine / allopurinol	265142	1	1	5.51345e+06	CPD-9023 [ C5 H4 N4 O, tgt=79.95, overall=79.95 ]			(119.028, 5650.29)(137.04562, 347.32748)(119.0351, 3773.8901)(136.0616, 200623.86)(137.0622, 8787.19)(163.03806, 699.78)
anthranil	141077	119595	127540	123508	CPD-16173 [ C7 H5 N O, tgt=57.70, overall=57.70 ]			(119.034, 7358.71)(101.02637, 8741.135)(123.0535, 28604.44)(139.5757, 1347.3401)(121.0641, 119231.85)(122.0672, 8106.62)(145.09612, 4757.2427)(127.02378, 1089466.5)(128.02509, 182625.0)
3-hydroxy-3-methylbutanoate	349695	248664	311937	144724	CPD-14642 [ C5 H9 O3, tgt=70.05, overall=70.05 ]			(119.0603, 1165.4371)(102.05426, 728.38995)(118.48209, 15180.375)(119.317825, 649.2925)(100.05345, 23390.305)(137.09465, 563.18)(118.084946, 5036.3604)(124.0381, 568.28)
<i>trans</i>-anol / chavicol / cinnamyl alcohol	1.00971e+06	566993	1.15921e+06	342480	CPD-9933 [ C9 H10 O, tgt=73.35, overall=73.35 ]			(119.06978, 10442.457)(138.08984, 12380.09)(139.09291, 563.57184)(117.073044, 651.865)(159.06828, 5821.8213)(140.0564, 5229.4756)(141.05556, 676.1766)
cinnamaldehyde	60951.2	57660.8	74961.4	56223.8	CINNAMALDEHYDE [ C9 H8 O, tgt=58.99, overall=58.99 ]			(119.06987, 16826.482)(120.06923, 2516.6416)(155.0423, 6593.98)(141.05345, 450.24)
1-hydroxycumene	44146.6	89620.1	50046.8	11648.1	CPD-12643 [ C9 H12 O, tgt=69.44, overall=69.44 ]			(119.08448, 3227.267)(137.09474, 3551.69)(144.07951, 14707.203)(145.08302, 960.70374)
L-2,4-diaminobutanoate	312000	222456	293701	274867	CPD-470 [ C4 H11 N2 O2, tgt=46.67, overall=46.67 ]			(119.105736, 16455.043)(143.84416, 3628.254)(144.07924, 7635.376)
2-(2-methylpyridin-3-yl)ethanol	17087500	8.24706e+06	8.87231e+06	9.6108e+06	CPD-15779 [ C8 H11 N O, tgt=86.50, overall=86.50 ]			(119.676186, 10401.496)(121.0813, 199.13)(160.07416, 16685.008)(161.0774, 3708.5017)(120.08046, 436484.53)(121.08278, 34999.47)(122.0932, 6180.54)(138.08981, 2731.42)(142.12141, 2198.234)
L-canaline	55340.1	18430	1	15691.9	L-CANALINE [ C4 H10 N2 O3, tgt= ]			(120.06865, 1841.9141)(119.069374, 16519.406)(159.06735, 9499.805)
phenylacetaldehyde	1.97972e+07	8.94299e+06	1.13084e+07	1.11234e+07	PHENYLACETALDEHYDE [ C8 H8 O, tgt=86.49, overall=86.49 ]			(121.0637, 33959.77)(102.04605, 2023.16)(121.06444, 357114.9)(122.0674, 30766.117)(123.068634, 1142.7134)(103.05359, 22006.0)(104.05731, 2796.7334)(138.09012, 28791.268)(139.09299, 1277.5029)(120.07987, 182240.19)(148.0591, 2907.5002)
benzimidazole	283293	260729	202892	220884	BENZIMIDAZOLE [ C7 H6 N2, tgt=51.31, overall=51.31 ]			(121.06375, 309.38998)(141.0394, 11346.486)(142.04337, 998.7534)
L-homoserine	141298	223087	113334	78701.8	HOMO-SER [ C4 H9 N O3, tgt=18.52, overall=18.52 ]			(121.064415, 215361.16)(122.067345, 15667.457)(123.0695, 361.375)(103.05352, 7978.193)(120.0646, 497.42)(102.054184, 686.624)(138.48175, 5053.581)(139.09355, 1638.355)(119.0843, 3389.9524)(124.03859, 7159.538)
(3Z,6Z)-nonadienal	14545.9	1	104360	1770360	CPD-8685 [ C9 H14 O, tgt=45.06, overall=45.06 ]			(121.1001, 6637.2866)(140.10611, 715.1975)(156.13689, 6336.983)(142.1216, 25048.494)(143.12506, 373.6425)
2-phenylethylamine	96241.8	1	131920	1	PHENYLETHYLAMINE [ C8 H12 N, tgt=11.46, overall=11.46 ]			(122.09458, 7365.6816)(124.11096, 7815.0386)
tropinone	105577	126044	136904	123921	TROPINONE [ C8 H14 N O, tgt=47.25, overall=47.25 ]			(122.095345, 1654.854)(142.1214, 9235.472)(141.13206, 952.6616)(163.09492, 6731.3887)(150.10175, 159110.83)
(<i>E</i>)-1-butenesulfenate / (Z)-butanethial S-oxide	4.51007e+06	3.97198e+06	8.55916e+06	1.1425e+07	CPD-13605 [ C4 H8 O S, tgt=45.79, overall=45.79 ]			(122.31713, 6936.0176)(104.91112, 553.1164)(128.39258, 87370.12)(110.50745, 5320.702)
3-hydroxybenzaldehyde / 4-hydroxybenzaldehyde / salicylaldehyde / tropolone	964339	412442	66546.4	1	3-OH-BENZALDEHYDE [ C7 H6 O2, tgt=22.45, overall=22.45 ]			(122.83888, 3315.2102)(123.045654, 18515.64)(129.02023, 116201.42)(130.0231, 8063.1694)
nicotinamide	1.36621e+06	1348595	1313450	1.55608e+06	NIACINAMIDE [ C6 H6 N2 O, tgt=47.60, overall=47.60 ]			(123.05043, 1561.6425)(107.04389, 7343.484)(123.054146, 9497.8)(141.52798, 1973.7006)(122.92778, 8774.399)(148.04556, 1976.3646)(150.0537, 1655.81)(127.023445, 19155.146)(128.02467, 10621.71)(129.02112, 9252.84)
3-dimethylsulfoniopropionaldehyde	55157.1	9771.62	1	22693.8	CPD-10472 [ C5 H11 O S, tgt=46.86, overall=46.86 ]			(123.0523, 7539.0146)(121.0643, 83747.81)(103.05354, 3294.96)(138.0899, 7900.0596)(144.04335, 2733.962)(128.02577, 204005.05)
benzoate	1.31189e+06	1236435	1.10092e+06	1.08022e+06	BENZOATE [ C7 H5 O2, tgt=17.30, overall=17.30 ]			(124.03865, 3809.03)(123.10132, 2262.9985)(123.05419, 5524.3213)(147.02495, 2071.3357)(129.01886, 5567.8438)
3,6-dihydronicotinate	1757827	1.20989e+06	2.0168e+06	1.18877e+06	CPD-14074 [ C6H6NO2, tgt= ]			(124.039, 11478.945)(111.04343, 2392.4265)(128.07475, 2143.1833)(147.02808, 4311.4272)(129.02113, 132954.83)(130.02345, 7561.49)
3,5-dihydroxyanisole	40440.5	1	1	1	CPD-9494 [ C7 H8 O3, tgt=46.97, overall=46.97 ]			(124.039, 6904.68)(123.0444, 14092.97)
(2E)-2-ethylidene-4-hydroxy-5-methyl-3(2H)-furanone	5.76332e+06	358611	2.30906e+06	70061.5	CPD-10206 [ C7 H8 O3, tgt=46.97, overall=46.97 ]			(124.039, 6904.68)(123.0444, 14092.97)(158.0795, 2505.06)(144.07956, 34685.156)(145.08298, 4407.626)(163.03766, 100063.21)(164.04062, 14685.879)(165.0429, 3860.87)(145.0272, 3930.09)
dimethylsulfoniopropanoate-amine	1.33306e+06	1.0174e+06	1.36569e+06	1.25441e+06	CPD-10471 [ C5 H15 N S, tgt=59.14, overall=59.14 ]			(126.09038, 3342.6108)(142.12144, 12311.005)(144.07973, 55872.164)(145.083, 4558.5225)
L-threitol	148679	118127	144935	124190	CPD-6995 [ C4 H10 O4, tgt=47.38, overall=47.38 ]			(126.090385, 5167.51)(127.03744, 7864.136)
5-(2-hydroxyethyl)-4-methylthiazole	251188	69652.8	114317	1	THZ [ C6 H9 N O S, tgt= ]			(127.02391, 4717.827)(161.07724, 13801.518)
octanoate	1.26367e+06	1.17036e+06	1.5215e+06	1.39214e+06	CPD-195 [ C8 H15 O2, tgt=85.07, overall=85.07 ]			(127.9854, 6165.4355)(128.10641, 6528.7925)(148.14017, 1876.9763)(166.09613, 52657.6)(167.09978, 3558.1467)(148.0854, 1749.7611)(149.09308, 226.81)
5-oxooctanal	513691	268338	110482	199282	CPD-9422 [ C8 H14 O2, tgt=38.94, overall=38.94 ]			(128.10608, 25414.854)(142.12163, 49928.234)(143.12463, 360.2336)
(3<i>Z</i>)-hex-3-en-1-yl acetate	34584.1	233622	61771.4	185732	CPD-12846 [ C8 H14 O2, tgt=38.94, overall=38.94 ]			(128.10614, 25561.553)(142.12167, 49397.336)(143.12482, 243.13666)
(<i>S</i>)-4-amino-4,5-dihydro-2-thiophenecarboxylate	143495	68932	11233.4	1	CPD-12132 [ C5 H7 N O2 S, tgt= ]			(129.02124, 161891.72)(167.0532, 1070.5221)
3-chloro-L-alanine	270165	229506	202116	212635	CHLORALAN-CPD [ C3 H6 Cl N O2, tgt=45.90, overall=45.90 ]			(129.02167, 128339.11)(130.02353, 6248.684)(110.00811, 8588.929)(111.0097, 349.37)(141.03949, 12578.54)(142.04337, 1145.0237)(153.00883, 1800.2881)
isatin	2.4151e+06	2.15616e+06	2.30857e+06	2.14453e+06	ISATIN [ C8 H5 N O2, tgt=77.63, overall=77.63 ]			(129.02167, 144744.5)(130.02353, 7125.256)(148.05937, 353.99667)(175.03516, 5716.6885)(153.0095, 2073.21)
1-(3-aminopropyl)-4-aminobutanal	1.3795e+06	1189373	741782	797871	CPD-6121 [ C7 H18 N2 O, tgt=73.41, overall=73.41 ]			(129.13786, 5495.0435)(146.16418, 36319.723)(147.16716, 978.0607)
enol-oxaloacetate / oxaloacetate	598355	629596	432615	496628	ENOL-OXALOACETATE [ C4 H2 O5, tgt=35.43, overall=35.43 ]			(129.99304, 45865.652)(130.99832, 777.85895)(116.86016, 706.2493)(130.99944, 936.8785)(116.99464, 735.9473)(153.03815, 1821.838)
2-dehydropantolactone / furaneol (enol form)	1.15652e+06	1	1	1	2-DEHYDROPANTOYL-LACTONE [ C6 H8 O3, tgt=44.69, overall=44.69 ]			(130.04877, 2050.1765)(111.043236, 6979.9)(148.08516, 68.30666)(132.07973, 308.25333)(153.03973, 861.43335)
1-octanol	350273	122715	448072	254383	OCTANOL [ C8 H18 O, tgt=41.39, overall=41.39 ]			(130.15816, 27988.309)(131.1614, 472.985)(153.12569, 894.5091)(135.11543, 11348.603)
<i>O</i>-acetyl-L-serine / L-4-hydroxyglutamate semialdehyde	1.50824e+06	798746	983740	930386	ACETYLSERINE [ C5 H9 N O4, tgt=69.91, overall=69.91 ]			(130.17294, 7923.3403)(131.04358, 5609.27)(170.04709, 1346.895)(130.04889, 14909.84)(131.04443, 723.78174)(148.05899, 10571.0205)(153.03783, 779.04663)(155.041, 1701.7101)(156.04352, 1618.0139)(147.07516, 2495.15)
methylmethanethiosulfonate	418192	588342	305474	317042	METHYLMETHANETHIOSULFONATE [ C2 H6 O2 S2, tgt=78.49, overall=78.49 ]			(130.97835, 294.1825)(113.96285, 257.786)(144.01305, 14388.528)(145.01437, 740.0483)(146.0109, 465.5254)(130.13704, 10931.242)(130.99876, 468.20004)
(3<i>R</i>,5<i>S</i>)-3-hydroxy-1-pyrroline-5-carboxylate / 5-oxo-L-proline	75093	97962.9	147738	1	PYRROLINE-HYDROXY-CARBOXYLATE [ C5 H6 N O3, tgt= ]			(131.0435, 1339.475)
2-methylaspartate / D-glutamate / L-glutamate	74289.1	97962.9	147801	1	CPD0-1614 [ C5 H8 N O4, tgt= ]			(131.04378, 5998.277)(132.04338, 865.728)(148.0592, 450.97)(130.71184, 1262.03)(131.044, 13325.48)
3-ureidopropanoate	144762	150444	127391	114271	3-UREIDO-PROPIONATE [ C4 H7 N2 O3, tgt=58.44, overall=58.44 ]			(131.0438, 11204.964)(132.04306, 1305.08)(113.0337, 8832.202)(136.06148, 269033.34)(137.06258, 13654.463)(151.0854, 549.18)(155.04141, 7372.35)(156.04346, 4645.2197)(139.03261, 4611.544)(141.0387, 17345.82)
triethanolamine	11881585	4.67376e+06	5.16152e+06	3.86051e+06	CPD0-2459 [ C6 H16 N O3, tgt=98.30, overall=98.30 ]			(132.1013, 254480.4)(133.10435, 14157.325)(134.11478, 880.84576)(134.11632, 843.8567)
L-isoleucine	1.12561e+07	1.62779e+06	2012968	3.67653e+06	ILE [ C6 H13 N O2, tgt=98.30, overall=98.30 ]			(132.10143, 275113.5)(133.10452, 15438.157)(134.11446, 977.61993)(119.105484, 14430.725)(134.12381, 555.8471)(154.08458, 12472.013)(136.98412, 1650.7518)
&beta;-alanine betaine / 6-aminohexanoate / L-leucine / L-norleucine	1.12561e+07	1.55128e+06	1.86479e+06	3.67653e+06	CPD-6181 [ C6 H13 N O2, tgt=98.30, overall=98.30 ]			(132.10143, 275113.5)(133.10452, 15438.157)(134.11446, 977.61993)(134.12381, 555.8471)(138.57826, 237.47249)
glutarate / methylsuccinate	1.38354e+06	1.0013e+06	308193	540970	GLUTARATE [ C5 H6 O4, tgt=69.91, overall=69.91 ]			(132.1285, 3602.3691)(113.0263, 476.94)(148.05925, 14138.143)(130.04878, 11913.582)(131.04419, 817.1134)
2-hydroxysuccinamate / D-aspartate / L-aspartate	250168	1	1	1	2-HYDROXYSUCCINAMATE [ C4 H6 N O4, tgt=79.15, overall=79.15 ]			(133.0306, 3013.9219)(119.03436, 1319.066)(152.0669, 321.81)(136.06192, 116839.57)(137.0622, 7379.9487)
(<i>S</i>)-ureidoglycine / (2<i>R</i>)-2,3-dihydroxy-3-methylbutanoate	649700	631396	690800	670932	CPD0-2298 [ C3 H7 N3 O3, tgt=47.33, overall=47.33 ]			(133.04843, 3345.3381)(115.03819, 14769.241)
(<i>R</i>)-mandelonitrile / (4-hydroxyphenyl)acetonitrile / indolin-2-one / indoxyl	1	238559	1	670932	CPD-12702 [ C8 H7 N O, tgt= ]			(133.04884, 3285.0618)(115.03857, 14913.688)
<i>N</i>-hydroxy-L-valine	18025000	1.01276e+07	1.41238e+07	8.71005e+06	CPD-4862 [ C5 H10 N O3, tgt=67.21, overall=67.21 ]			(133.0748, 181.28)(150.10194, 388500.62)(151.1045, 28617.895)(134.09544, 170.52)
L-ornithine	563889	627258	424827	426342	L-ORNITHINE [ C5 H13 N2 O2, tgt=52.50, overall=52.50 ]			(133.10022, 25607.074)(134.10341, 1184.2289)(161.09467, 685.08826)
pteridine-ring	67219	59279.5	69706.1	10996.9	PTERIDINE-RING [ C6 H4 N4, tgt= ]			(134.04373, 2300.1)(136.97069, 24537.648)(137.0622, 8261.97)(150.0753, 7947.815)
hexanoate	628130	222745	249015	184665	HEXANOATE [ C6 H11 O2, tgt=25.54, overall=25.54 ]			(134.11617, 500.24332)(118.08534, 6754.584)
L-thiazolidine-4-carboxylate	102340	106181	71515.2	67261.6	CPD0-1571 [ C4 H7 N O2 S, tgt=23.34, overall=23.34 ]			(135.01242, 3121.229)(115.65542, 3790.9297)(139.03224, 5067.243)(116.01327, 2918.485)(143.00117, 268773.2)
phenylglyoxal	448976	1	1	1	PHENYLGLYOXAL [ C8 H6 O2, tgt= ]			(135.04297, 34080.824)(117.0325, 4072.6099)(139.07327, 243.5275)
butyl propanoate	1.84502e+06	610249	965720	1	CPD-19956 [ C7 H14 O2, tgt=32.94, overall=32.94 ]			(135.1154, 2763.2168)
D-valine / glycine betaine / L-norvaline / L-valine / N,N-dimethyl-&beta;-alanine	167150	318880	317126	304322	CPD-3642 [ C5 H11 N O2, tgt=71.75, overall=71.75 ]			(135.1157, 16030.417)(144.07956, 10043.455)(145.08311, 424.93802)
<i>N</i>-carbamoylputrescine	1	144361	1	1	CPD-597 [ C5 H14 N3 O, tgt=55.59, overall=55.59 ]			(135.1161, 931.91)(137.09486, 21695.354)(138.0978, 516.14667)
nt-pentose-ring	13569.9	71273.1	1	1	NUKED-PENTOSE-RING [ C5 H10 O4, tgt= ]			(136.06137, 853.0475)(139.7016, 9074.29)(142.04245, 812.32)
2-descarboxy-cyclo-dopa	26486.6	159040	201454	389543	CPD-8853 [ C8 H11 N O2, tgt= ]			(136.07368, 2873.3486)(177.06795, 11427.137)(154.08519, 16930.21)
guanine / isoguanine	1.18275e+06	1.34987e+06	1.38862e+06	1252911	GUANINE [ C5 H5 N5 O, tgt=75.77, overall=75.77 ]			(136.67017, 324.45248)(152.0558, 54005.086)(153.05453, 1856.9309)(137.79553, 143734.83)(170.08014, 988.40247)
trigonelline	8.99432e+06	5.59015e+06	9.58907e+06	2.40037e+06	METHYLNICOTINATE [ C7 H7 N O2, tgt=84.27, overall=84.27 ]			(137.0449, 134.22)(119.03408, 1673.7328)(138.0543, 185884.69)(139.0572, 13516.448)(123.05324, 8285.886)(140.0792, 742.9425)(165.05286, 4376.4185)(147.04134, 1294.4955)
4-aminobenzoate	3.53303e+06	5.03263e+06	4.58589e+06	5.51345e+06	P-AMINO-BENZOATE [ C7 H6 N O2, tgt=58.58, overall=58.58 ]			(137.0453, 333.02798)(119.03422, 4178.4956)(138.17908, 171539.95)(141.0532, 496.33)(119.034996, 3649.4656)(136.06133, 220652.89)(137.06221, 10990.219)(163.03775, 258668.47)(164.04062, 20549.818)
8-hydroxypurine	457002	1	839671	5.51345e+06	CPD-9017 [ C5 H4 N4 O, tgt=85.28, overall=85.28 ]			(137.04553, 326.50662)(119.03476, 3164.0256)(136.06169, 200485.64)(137.06172, 11268.937)
hypoxanthine	1	1	1	5.51345e+06	HYPOXANTHINE [ C5 H4 N4 O, tgt=85.28, overall=85.28 ]			(137.04562, 347.32748)(119.0351, 3773.8901)(136.06177, 241668.69)(137.06247, 12360.297)
3-aminopropyl-methyl-phosphinate	349168	259312	313454	251623	3-AMINOPROPYL-METHYL-PHOSPHINATE [ C4 H12 N O2 P, tgt=23.29, overall=23.29 ]			(137.06213, 13563.372)(119.04669, 2788.1733)(121.06375, 92633.49)(138.08984, 13355.1045)(139.0924, 408.52002)
3-(pyrazol-1-yl)-L-alanine / bacimethrin / L-histidine	1	1	87411.9	1	CPD-670 [ C6 H9 N3 O2, tgt= ]			(137.06235, 17625.855)(174.1106, 1178.98)
D-allothreonine / D-threonine / L-threonine / O-methylserine	40870.5	11975.5	1	1	CPD-10303 [ C4 H9 N O3, tgt=18.52, overall=18.52 ]			(137.09467, 3936.16)(119.0843, 3389.9524)
1-heptanal	56687.5	200684	49921.5	1	CPD-7620 [ C7 H14 O, tgt=40.98, overall=40.98 ]			(137.09476, 7015.4272)(138.0978, 516.14667)(119.08426, 3396.3408)
2-keto-4-hydroxybutyrolactone / succinate	1	93692.5	123322	82246.1	CPD-19606 [ C4 H4 O4, tgt= ]			(137.14284, 233699.52)(139.00145, 6576.3877)
(2E)-4-hydroxy-5-methyl-2-propylidene-3(2H)-furanone	213807	146049	220608	1	CPD-10207 [ C8 H10 O3, tgt=53.33, overall=53.33 ]			(138.05418, 231640.05)(139.05698, 17172.639)(137.06238, 14372.127)
3,5-dimethoxyphenol	213807	171832	242384	100608	CPD-9499 [ C8 H10 O3, tgt=53.33, overall=53.33 ]			(138.05426, 229215.36)(139.05704, 16965.623)(137.06227, 13966.399)
(4-hydroxyphenyl)acetaldehyde / 3-methoxybenzaldehyde / methyl benzoate	349168	259312	313419	251623	HYDRPHENYLAC-CPD [ C8 H8 O2, tgt=53.33, overall=53.33 ]			(138.05429, 235802.66)(139.05707, 17349.898)(119.87572, 4133.4785)(123.0533, 16405.81)(137.06213, 13563.372)(119.04715, 10962.82)(137.07645, 298.3)
adenine	410067	303616	1	4.68851e+06	ADENINE [ C5 H5 N5, tgt=79.95, overall=79.95 ]			(138.05475, 204349.38)(139.05757, 16587.303)(136.06145, 144007.11)(137.0622, 6658.8247)
tyramine	18175000	1.07284e+07	1.04185e+07	1.04286e+07	TYRAMINE [ C8 H12 N O, tgt=86.50, overall=86.50 ]			(138.09003, 4405.3267)(120.08042, 448369.03)(121.08274, 36016.152)(122.0932, 6427.76)(122.09471, 5464.39)(161.0776, 210.07)
thetin	2.34341e+06	2.81569e+06	3.33245e+06	2.32022e+06	DIMETHYLSULFONIOACETATE [ C4 H8 O2 S, tgt=63.47, overall=63.47 ]			(138.49307, 111109.74)(139.05745, 13703.251)(123.0479, 1403.53)(144.01299, 19992.898)(145.28258, 1191.011)(146.01067, 834.00055)
adenine-ring	3.83728e+06	3.47392e+06	5.82655e+06	4.78444e+06	ADENINE-RING [ C5 H5 N5, tgt=79.95, overall=79.95 ]			(138.7083, 81363.59)(139.05757, 16587.303)(136.06136, 194779.56)(137.06201, 9806.165)
azaguanine	290179	111454	97210.6	73910.4	CPD0-1143 [ C4 H4 N6 O, tgt=78.18, overall=78.18 ]			(139.0326, 3814.7932)(135.043, 55097.94)(136.0468, 2707.66)(157.07002, 55528.25)(175.03506, 4892.9155)(176.0371, 326.31)(159.02214, 3701.9856)(160.02165, 1736.5712)
L-<i>threo</i>-tetruronate	1	20291.4	30251.8	1	CPD-13061 [ C4 H5 O5, tgt= ]			(139.03293, 4712.148)(116.013535, 3396.4478)(137.99063, 3049.5637)
(<i>Z</i>)-[(4-hydroxyphenyl)acetaldehyde oxime] / (E)-(4-hydroxyphenyl)acetaldehyde oxime / <i>cis</i>-indole-2,3-dihydrodiol / 1-<i>aci</i>-nitro-2-phenylethane / 5-deoxypyridoxal	134037	119355	135933	129142	CPD-1041 [ C8 H9 N O2, tgt=31.44, overall=31.44 ]			(139.07266, 612.42004)(174.05562, 4998.6816)(156.04385, 4530.3994)(157.0384, 479.85)
3,4-dihydroxybenzaldehyde	3.64634e+06	2.95139e+06	2.63454e+06	2.50302e+06	CPD-7616 [ C7 H6 O3, tgt=85.05, overall=85.05 ]			(139.12395, 2061.4946)(124.0383, 5882.825)(157.06953, 6100.7007)(158.0709, 409.77002)(138.0543, 169202.33)(139.05722, 12370.469)(165.03117, 565.93164)(144.013, 18585.117)(145.15297, 1348.9983)
D-cysteine / L-cysteine	1197820	789076	603666	269495	D-CYSTEINE [ C3 H7 N O2 S, tgt=54.68, overall=54.68 ]			(139.58798, 11868.279)(141.0536, 522.1633)(124.03855, 3375.7922)(144.01273, 10363.579)(145.01408, 443.05264)(146.01065, 275.954)(129.99324, 26887.824)(130.99922, 920.74493)
2-amino-4-carboxypyrimidine	7.9259e+06	7597163	8.68863e+06	8.98906e+06	2-AMINO-4-CARBOXYPYRIMIDINE [ C5 H4 N3 O2, tgt=84.35, overall=84.35 ]			(139.97697, 1129.4889)(157.06956, 2222.8025)(158.071, 464.32)(159.068, 366.38)(138.05428, 188713.81)(139.09882, 13225.68)(165.0308, 966.95)(144.01299, 5762.3237)(145.01436, 678.97504)
nicotinate / picolinate	125334	136025	125558	123794	NIACINE [ C6 H4 N O2, tgt=62.05, overall=62.05 ]			(140.05638, 5848.7915)(141.05489, 548.11334)(123.0537, 187.75)(145.53255, 1825.832)(146.01099, 551.09656)
1-naphthaldehyde	1.13315e+06	999892	1.00257e+06	1.0552e+06	CPD-7614 [ C11 H8 O, tgt=47.70, overall=47.70 ]			(140.0564, 6850.5825)(141.05492, 564.1534)(158.00897, 12446.978)(159.00597, 7760.4497)(159.0675, 7124.855)(139.058, 11559.26)
5-(hydroxymethyl)-2-methyl-4(1H)-pyrimidinone	361020	213982	317973	241519	CPD-15778 [ C6 H8 N2 O2, tgt=62.66, overall=62.66 ]			(140.05655, 8511.321)(141.05493, 584.08997)(123.04842, 3658.48)(123.053604, 14437.761)(140.07945, 847.25336)(165.37326, 4454.698)(168.06346, 565.9557)(145.8604, 3563.659)
(2<i>E</i>,4<i>E</i>,6<i>E</i>)-7-hydroxy-4-methylhepta-2,4,6-trienal / 3-methoxy-5-hydroxytoluene / 4-tyrosol	1.11539e+07	9.40346e+06	12162500	1.17079e+07	CPD-14650 [ C8 H10 O2, tgt=85.99, overall=85.99 ]			(140.07954, 621.39404)(121.064415, 359592.62)(122.06736, 27285.516)(123.068634, 1079.0299)(138.09012, 30116.695)(139.09297, 1133.225)(166.0704, 204.31)(148.05907, 3184.5896)
4-amino-2-methyl-5-pyrimidinemethanol	1.10545e+07	9.26327e+06	1.1876e+07	1.16194e+07	HMP [ C6 H9 N3 O, tgt=81.76, overall=81.76 ]			(140.07956, 537.74)(121.064415, 369198.56)(122.06737, 28043.5)(123.068634, 1136.7999)(148.05907, 3128.285)
histidinal	1	1	108957	365115	HISTIDINAL [ C6 H10 N3 O, tgt= ]			(140.07965, 772.61)(122.0678, 35273.594)(123.0701, 307.9)(150.0756, 481.85)
(<i>S</i>)-(+)-allantoin	393720	354039	357594	358980	S-ALLANTOIN [ C4 H6 N4 O3, tgt=64.04, overall=64.04 ]			(141.03952, 13498.036)(142.0434, 1242.3612)(158.22734, 9848.638)(159.06816, 8144.2993)(185.03958, 635.34)(165.23112, 2000.6453)(166.0303, 482.275)
4-methylene-L-glutamate	394422	355645	362947	356457	CPD-1774 [ C6 H8 N O4, tgt=51.75, overall=51.75 ]			(141.03952, 13553.015)(142.0434, 1247.6018)(158.0716, 10137.439)(159.06827, 8155.2925)(185.03963, 661.7)(165.03123, 2469.9944)(166.03078, 489.75876)
4-nitrophenol	3.70018e+06	3.88275e+06	2.81613e+06	3.01068e+06	P-NITROPHENOL [ C6 H4 N O3, tgt=47.59, overall=47.59 ]			(141.0532, 460.88)(143.00119, 243161.42)(144.00362, 9262.401)(145.00366, 485.925)
pimelate	6.01972e+06	346600	97736.6	64658.9	CPD-205 [ C7 H10 O4, tgt=45.89, overall=45.89 ]			(141.0532, 460.88)(159.06815, 8845.509)(141.05565, 677.1533)(182.8256, 2359.7188)(166.68259, 109907.42)(164.0407, 23212.64)(165.0429, 4109.255)
&beta;-methylenecyclopropyl pyruvate	1.04551e+06	810845	840640	1.10439e+06	CPD-9739 [ C7 H7 O3, tgt=21.53, overall=21.53 ]			(141.18336, 11044.953)(142.04419, 955.3566)(124.03868, 4569.0376)(123.788666, 4625.5884)(157.06976, 16985.568)(158.07198, 9928.667)(159.06874, 8114.422)(139.06004, 12441.892)(165.03192, 2766.105)(147.02444, 3019.6177)
calystegine A3	133987	84002.1	315827	23942.2	CPD-8001 [ C7 H14 N O3, tgt=38.96, overall=38.96 ]			(142.085, 9073.25)(166.119, 382.595)(148.11049, 6083.248)
hypoglycin A	1	113410	98924.6	200935	CPD-9699 [ C7 H11 N O2, tgt=42.97, overall=42.97 ]			(142.0855, 8466.248)(124.07504, 2924.887)(146.05865, 19510.064)(147.05984, 256.41998)
hygrine	342066	323108	256765	193042	CPD-7995 [ C8 H16 N O, tgt=42.14, overall=42.14 ]			(142.12144, 17475.496)(143.12445, 449.93002)(124.11111, 8685.851)
conhydrinone	315473	56842.8	211002	193042	CPD-14512 [ C8 H16 N O, tgt=42.14, overall=42.14 ]			(142.12144, 4623.91)(124.11111, 8685.851)
pseudotropine / tropine	315473	56842.8	211002	193042	PSEUDOTROPINE [ C8 H16 N O, tgt=42.14, overall=42.14 ]			(142.12144, 4623.91)(124.11111, 8685.851)
histidinol	1	183185	85043.6	93607.1	HISTIDINOL [ C6H12N3O, tgt= ]			(142.12173, 50859.6)(143.12477, 238.15285)
5-hydroxy-&gamma;-coniceine	432408	424181	234250	332913	CPD-14516 [ C8 H15 N O, tgt=42.14, overall=42.14 ]			(142.12184, 4425.3457)(142.12115, 4212.8438)(124.11115, 12269.492)
(3Z)-3-nonenal	75207	61298.8	91597.4	114046	CPD-8684 [ C9 H16 O, tgt=43.74, overall=43.74 ]			(142.12186, 24005.67)(158.1529, 6208.898)(163.11018, 7011.642)(145.09978, 799.56665)
&alpha;-fenchocamphorone	1	1	1	11238.6	CPD-12224 [ C9H14O, tgt= ]			(142.1219, 12786.05)(121.1005, 5553.5)(156.1376, 403.81)
3-chlorobenzaldehyde	3.1583e+06	3936429	2.85792e+06	2903472	CPD-10660 [ C7 H5 Cl O, tgt=48.95, overall=48.95 ]			(143.00119, 240264.53)(144.00362, 9135.569)(145.00438, 785.24664)(145.61784, 3076.9375)(145.0142, 381.66)(146.0115, 331.94)(145.03339, 4688.436)
diethyl thiosulfinate	1011354	1.37513e+06	34379.6	100952	CPD-17446 [ C4 H10 O S2, tgt=47.42, overall=47.42 ]			(143.96054, 14704.589)(144.0132, 21438.9)(145.01465, 994.986)(141.03885, 5375.6143)
2-oxoglutarate / acetonedicarboxylate	163092	172811	119006	123083	2-KETOGLUTARATE [ C5 H4 O5, tgt=41.46, overall=41.46 ]			(144.00362, 7762.94)(145.00368, 495.83252)(145.68364, 1935.9869)(167.05376, 660.13324)(145.03337, 4061.533)
2-vinyl-[4H]-1,3-dithin / 3-vinyl-[4H]-1,2-dithin	437139	294988	229528	114359	CPD-9295 [ C6 H8 S2, tgt=42.47, overall=42.47 ]			(144.00386, 3717.9724)(145.00604, 496.098)(145.01437, 763.168)(146.01088, 457.3305)(166.03094, 388.91818)
2-hydroxy-4-carboxypyrimidine	44538.2	88208.5	1	1	2-HYDROXY-4-CARBOXYPYRIMIDINE [ C5 H3 N2 O3, tgt= ]			(145.03331, 4456.759)(127.02373, 999597.1)(141.0394, 14037.502)(142.04324, 1050.97)(167.01172, 1536.2966)
phenylmethanesulfenate	482892	433173	431073	335167	CPD-12491 [ C7 H8 O S, tgt=51.58, overall=51.58 ]			(145.03336, 3950.1714)(141.03949, 12246.942)(142.04324, 1094.5743)(127.023766, 922623.9)(128.02507, 150007.86)(159.06825, 7200.6465)(140.08762, 6228.025)(145.83337, 563.66174)
(<i>S</i>)-2-aceto-2-hydroxybutanoate / 2-dehydropantoate	339942	321928	466518	889057	2-ACETO-2-HYDROXY-BUTYRATE [ C6 H9 O4, tgt=40.35, overall=40.35 ]			(145.0485, 13211.975)(127.038055, 11221.051)(165.0893, 153.77)
1-(methylsulfanyl)-5-<i>aci</i>-nitropentane / L-homomethionine	248720	142108	265531	83648.9	CPD-12392 [ C6 H13 N O2 S, tgt=45.82, overall=45.82 ]			(146.05865, 13590.721)(146.05925, 10603.885)(183.0997, 9208.411)(165.08923, 1600.1434)
L-ethionine	321008	412886	265531	379175	ETHIONINE [ C6 H13 N O2 S, tgt=45.82, overall=45.82 ]			(146.05865, 13590.721)(147.05952, 5476.525)(183.0997, 9208.411)(165.08923, 1600.1434)(187.0639, 126127.86)(168.16127, 34341.06)(169.27335, 6460.713)(170.04782, 4533.0938)
&alpha;-L-fucopyranose / &alpha;-L-rhamnopyranose / <i>aldehydo</i>-L-fucose / 2-deoxy-D-galactose	221908	204086	244121	283013	CPD-10329 [ C6 H12 O5, tgt=83.46, overall=83.46 ]			(146.05872, 14492.467)(147.05984, 256.41998)(184.60535, 5714.94)(186.111, 851.36)(165.93687, 7127.552)(166.93256, 1337.7738)(167.10089, 285.53497)(188.0661, 9013.73)(169.0509, 6237.99)(170.0474, 3827.05)
8-hydroxyquinoline	279288	275589	265058	199338	8-HYDROXYQUINOLINE [ C9 H7 N O, tgt=50.31, overall=50.31 ]			(146.05882, 13282.759)(147.05984, 256.41998)(165.2152, 2649.8625)(166.2214, 6243.5156)(167.10013, 341.52734)(148.0849, 306.57)
&beta;-L-rhamnopyranose	221908	204086	244121	465998	CPD0-1112 [ C6 H12 O5, tgt=83.46, overall=83.46 ]			(146.05885, 13611.236)(147.05984, 256.41998)(183.79501, 7029.1724)(186.1113, 2187.2578)(165.86371, 6669.7764)(166.84903, 2011.268)(167.10074, 304.128)(188.0661, 9013.73)(169.0509, 6237.99)(170.0474, 3827.05)
indole-3-carboxaldehyde	132924	101930	114238	199338	INDOLE-3-CARBOXALDEHYDE [ C9 H7 N O, tgt=50.31, overall=50.31 ]			(146.05905, 12810.821)(165.08965, 1945.2739)(166.09618, 7322.9287)(167.10025, 360.2436)(148.0849, 306.57)
1-(3-aminopropyl)-pyrrolinium	1.3795e+06	1189373	741782	797871	CPD-6123 [ C7 H16 N2, tgt=73.41, overall=73.41 ]			(146.16418, 36319.723)(147.16716, 978.0607)(129.13786, 5495.0435)
dehydrospermidine	1.17432e+06	1.05769e+06	639895	704667	CPD-14378 [ C7 H20 N3, tgt=73.51, overall=73.51 ]			(146.16423, 37465.74)(147.16716, 971.9258)
(<i>R</i>)-2-hydroxyglutarate / (<i>S</i>)-2-hydroxyglutarate	1.98768e+06	1.80293e+06	1.93455e+06	1.18541e+06	R-2-HYDROXYGLUTARATE [ C5 H6 O5, tgt=48.70, overall=48.70 ]			(147.02266, 3820.8762)(129.05258, 136953.4)(130.02342, 7734.9736)(165.05367, 2187.3)(168.0642, 901.7334)(150.05627, 6470.69)(173.01976, 1522.879)(174.0228, 391.06)(153.00873, 2131.8337)(154.00821, 403.33)
2-hydroxy-5-oxoproline / 2-oxoglutaramate	1.00932e+06	961460	1.22284e+06	1.19127e+06	CPD-16876 [ C5 H6 N O4, tgt=45.44, overall=45.44 ]			(147.04141, 681.31)(127.0234, 30026.611)(128.02455, 7053.199)(129.0208, 6039.72)(165.71902, 133.19177)(166.07149, 259.19998)(148.05916, 10624.146)
coumarin	2.78938e+06	1.86375e+06	2.00181e+06	715914	COUMARIN [ C9 H6 O2, tgt=45.82, overall=45.82 ]			(147.04227, 9161.373)(128.02493, 174635.38)(129.02127, 134829.86)(131.99557, 1367.7562)(132.0427, 873.63)(146.05928, 6236.2485)
mesifurane (enol form)	325518	118759	144863	178288	CPD-10214 [ C7 H10 O3, tgt=72.35, overall=72.35 ]			(147.07486, 816.458)(147.0831, 999.97003)(165.05293, 11239.72)(166.0601, 1637.7349)(149.04726, 28947.988)
homofuraneol	325518	118759	144863	190344	CPD-10201 [ C7 H10 O3, tgt=72.35, overall=72.35 ]			(147.0749, 795.1605)(147.0831, 999.97003)(165.05296, 10987.578)(166.0601, 1637.7349)(149.163, 30220.852)
(<i>S</i>)-2-amino-6-oxohexanoate	166462	121450	76271.2	22736.6	ALLYSINE [ C6 H11 N O3, tgt=65.13, overall=65.13 ]			(147.07509, 4046.812)(163.11002, 8323.458)(145.09982, 893.4571)(168.06358, 903.001)(150.51788, 7933.107)(153.0558, 943.83)
6-amino-2-oxohexanoate	109709	121450	1	22736.6	2-KETO-6-AMINO-CAPROATE [ C6 H11 N O3, tgt=65.13, overall=65.13 ]			(147.07509, 4046.812)(168.06358, 903.001)(150.51788, 7933.107)(153.0558, 943.83)
D-glutamine / L-glutamine	52841.8	1	37396.5	15840.1	GLUTAMIDE [ C5 H10 N2 O3, tgt= ]			(147.07509, 6650.608)(150.07533, 5350.82)
<i>N,N</i>-dihydroxy-L-isoleucine	5.2564e+06	4.52481e+06	5.15381e+06	1.28647e+06	CPD-10272 [ C6 H12 N O4, tgt=52.29, overall=52.29 ]			(147.07533, 1422.6824)(166.0898, 108095.91)(167.09148, 8241.019)(168.09227, 163.10089)(147.07465, 669.92004)(185.06451, 227898.14)(186.06627, 69410.48)(187.06306, 50843.71)(167.4865, 715.3886)
3-(carbamoylamino)-2-methylpropanoate	132325	274623	289572	582982	3-UREIDO-ISOBUTYRATE [ C5 H9 N2 O3, tgt=47.91, overall=47.91 ]			(147.07555, 364.315)(168.04987, 38319.016)(169.05133, 6884.848)(170.04782, 4649.028)
4-guanidinobutyramide	1.20421e+06	1	1	1	4-GUANIDO-BUTYRAMIDE [ C5 H13 N4 O, tgt=46.70, overall=46.70 ]			(147.11542, 62.2)(128.10588, 8308.038)(167.15257, 485.712)(147.9381, 4028.7583)(148.1397, 8652.12)
(<i>E</i>)-5-(methylsulfanyl)pentanal oxime	860106	1.35604e+06	1.37191e+06	1.26605e+06	CPDQT-341 [ C6 H13 N O S, tgt=41.56, overall=41.56 ]			(147.97905, 856.2977)(150.07555, 3355.4893)(167.09897, 1219.2112)(153.13057, 1900.6119)(154.0428, 917.49664)
<i>N,N</i>-dihydroxy-L-valine	1.46813e+06	2.23931e+06	1.34742e+06	1.12737e+06	CPD-4863 [ C5 H10 N O4, tgt=78.83, overall=78.83 ]			(148.05919, 17269.955)(130.04875, 14804.001)(131.04453, 1290.29)(150.0751, 2873.5464)(136.07317, 1840.1781)(166.09605, 52873.996)(167.0998, 3981.7827)(148.08542, 2024.9319)(149.09332, 251.674)(171.8325, 868.77)(153.03973, 21996.555)(154.04222, 1170.7279)
S-methyl-L-methionine	2.40667e+06	2.08473e+06	2.39707e+06	2.22197e+06	CPD-397 [ C6 H14 N O2 S, tgt=78.71, overall=78.71 ]			(148.05937, 353.99667)(147.0754, 338.31)(187.06396, 135225.77)(188.06633, 9542.154)(169.05101, 6700.1655)(170.04752, 4595.272)
methylchavicol	18820.1	1	33314.4	23038.9	CPD-6484 [ C10H12O, tgt= ]			(148.08563, 4809.0103)(149.09398, 4163.112)(150.1004, 318.15)(166.12079, 1240.23)
<i>t</i>-anethole	18820.1	53419.4	84181	23038.9	CPD-9930 [ C10 H12 O, tgt=33.17, overall=33.17 ]			(148.08563, 4809.0103)(149.26172, 3502.7366)(150.1004, 318.15)(166.11957, 771.404)(148.11053, 8136.8047)(158.08, 12357.28)
cinnamate	783866	380633	790299	1	CPD-674 [ C9 H7 O2, tgt=47.29, overall=47.29 ]			(148.79936, 2005.0784)(132.04283, 396.81332)(150.0565, 3251.8765)(131.04407, 2068.9058)(150.07516, 2907.966)
4-hydroxy-5-methyl-2-methylene-3(2H)-furanone / phloroglucinol	1655527	1.54185e+06	1.4439e+06	1.50982e+06	CPD-10205 [ C6 H6 O3, tgt=80.25, overall=80.25 ]			(149.02219, 43064.934)(150.02528, 1977.9269)
2-formylbenzoate	1.71899e+06	1.59338e+06	1.49631e+06	1.56653e+06	CPD-1131 [ C8 H5 O3, tgt=74.73, overall=74.73 ]			(149.0222, 44422.996)(150.02528, 2059.6108)
homogentisate / vanillate	1.71441e+06	1.5913e+06	1.48928e+06	1.56547e+06	HOMOGENTISATE [ C8 H7 O4, tgt=74.86, overall=74.86 ]			(149.0222, 44640.555)(150.02528, 2072.6777)
2-hydroxy-4-(methylsulfanyl)butanoate	281644	678342	1	1.50982e+06	CPD-10468 [ C5 H9 O3 S, tgt= ]			(149.02264, 45843.785)(150.02568, 2106.1892)
O-aminobenzaldehyde	32232.8	43905	35918.4	1	CPD-16172 [ C7 H7 N O, tgt= ]			(149.0581, 3336.4346)(131.04782, 2710.3713)
ricinine	863261	525367	1.19783e+06	743158	RICININE [ C8 H8 N2 O2, tgt=98.32, overall=98.32 ]			(149.05817, 3989.7485)(150.05402, 793.85443)(170.08, 2668.639)(149.05869, 4675.933)(182.09074, 33508.46)(183.09384, 2468.8508)(166.08774, 445864.25)(167.08984, 36931.79)(168.09183, 1295.9504)
4-coumaraldehyde	16937500	7.82222e+06	7.59897e+06	1.24087e+06	COUMARALDEHYDE [ C9 H8 O2, tgt=98.60, overall=98.60 ]			(149.05824, 4747.6216)(150.05383, 2316.0386)(131.04704, 5610.827)(132.04373, 1058.23)(166.08777, 485943.28)(167.0899, 40684.215)(168.09158, 1357.1166)(156.5416, 3271.645)
1-phenylpropane-1,2-dione / 3,4-dihydrocoumarin	16937500	7.82222e+06	7.59897e+06	1.04632e+06	CPD-9949 [ C9 H8 O2, tgt=98.60, overall=98.60 ]			(149.05824, 4747.6216)(150.05383, 2316.0386)(131.04793, 4097.468)(166.08777, 485943.28)(167.0899, 40684.215)(168.09158, 1357.1166)
3-phenylpropanoate	1479495	602430	580191	646383	3-PHENYLPROPIONATE [ C9 H9 O2, tgt=58.95, overall=58.95 ]			(149.0583, 9210.878)(150.0543, 741.2125)(132.71904, 5711.3335)(167.0893, 65489.484)(168.09126, 3815.3967)(174.05568, 4241.727)(155.04155, 5785.04)(156.0439, 3914.0764)
sulcatone	223546	170340	182259	188687	CPD-7969 [ C8 H14 O, tgt=47.45, overall=47.45 ]			(149.0946, 4740.611)(109.10043, 4887.523)(127.70819, 5250.5693)(128.1065, 9635.49)(127.111595, 1562.7975)(129.13751, 3039.1038)
L-methionine	677127	725033	887211	160029	MET [ C5 H11 N O2 S, tgt=43.86, overall=43.86 ]			(150.05376, 4497.1816)(131.88983, 2728.4517)(132.04265, 1305.12)(151.93799, 2919.377)(168.34949, 14889.146)(168.31232, 889.6478)(150.67389, 2082.28)(175.03584, 5819.0015)(176.03734, 483.82333)(157.0307, 571.70667)
<i>S</i>-ethyl-L-cysteine / 1-(methylsulfanyl)-4-<i>aci</i>-nitrobutane / <i>N</i>-methylanthranilate	124304	55262.5	233095	160029	CPD-9300 [ C5 H11 N O2 S, tgt=43.86, overall=43.86 ]			(150.0545, 4905.7603)(131.88983, 2728.4517)(132.04265, 1305.12)(151.38963, 7162.36)(169.58267, 1138.1425)(170.0796, 639.45)(150.0747, 4876.505)(175.03584, 5819.0015)(176.03734, 483.82333)(157.0307, 571.70667)
3-(aminomethyl)indole / monofluoromethylornithine	1	1	56491	1	CPD-8913 [ C9H11N2, tgt= ]			(150.10031, 427.2)(170.0794, 9316.971)
(6<i>E</i>)-8-hydroxygeranial / (6<i>E</i>)-8-oxogeraniol / 3&beta;-hydroxy-&beta;-cyclocitral	19225000	1.04528e+07	15037500	9331754	CPD-9977 [ C10 H16 O2, tgt=64.52, overall=64.52 ]			(150.10194, 391334.94)(151.1045, 28833.824)(194.11566, 361.45502)(177.1005, 1648.0023)
(-)-isopiperitenone	1.13284e+07	4.22479e+06	14950000	9.32749e+06	CPD-1090 [ C10 H14 O, tgt=68.32, overall=68.32 ]			(150.10196, 394435.34)(151.10448, 29092.645)(151.11041, 392.8175)(133.10023, 24797.611)(134.10345, 1090.9155)(177.1005, 1648.0023)
(-)-carvone / (+)-carvone / (+)-menthofuran / (4<i>S</i>)-perillyl aldehyde / 4-isopropylbenzyl alcohol / safranal	340883	473004	1	9.32749e+06	CPD-1089 [ C10 H14 O, tgt=68.32, overall=68.32 ]			(150.1024, 273660.34)(151.105, 20091.168)(151.11041, 392.8175)(133.10023, 24797.611)(134.10345, 1090.9155)(177.10089, 1755.1499)
&alpha;-D-lyxopyranose / &alpha;-D-ribofuranose / &alpha;-D-xylopyranose / &alpha;-L-arabinofuranose / &beta;-D-ribofuranose / &beta;-D-xylopyranose / &beta;-L-arabinopyranose / <i>aldehydo</i>-D-arabinose / <i>aldehydo</i>-D-ribose / <i>aldehydo</i>-D-xylose / <i>aldehydo</i>-L-arabinose / L-ribose / pentose-ring	365721	226773	154840	166230	CPD-227 [ C5 H10 O5, tgt=75.03, overall=75.03 ]			(150.30617, 6820.527)(153.0558, 1344.24)(134.04373, 2222.7559)(152.06714, 731.52)(136.58784, 111055.58)(137.06233, 11545.758)(168.0909, 2284.95)(150.07542, 7016.997)
(<i>S</i>)-4-hydroxymandelonitrile / (R)-4-hydroxymandelonitrile / 2-formylaminobenzaldehyde / 3-hydroxyindolin-2-one / 5,6-dihydroxyindole / p-hydroxymandelonitrile	348456	236156	28895	174974	CPD-648 [ C8 H7 N O2, tgt=73.64, overall=73.64 ]			(151.05508, 13233.769)(152.14671, 5256.04)(150.05634, 8159.5215)(137.06024, 6760.26)(150.07497, 6581.3096)
pyridoxal	324110	121485	1	102756	PYRIDOXAL [ C8 H9 N O3, tgt=72.40, overall=72.40 ]			(151.55568, 16357.214)(152.43094, 5660.662)(168.06358, 903.001)(150.05626, 8123.781)
<i>meso</i>-tartrate /D-tartrate / L-tartrate	598169	624308	427173	499358	MESO-TARTRATE [ C4 H4 O6, tgt=20.71, overall=20.71 ]			(153.00885, 2167.5332)(129.99304, 46033.984)(130.99832, 780.56305)(130.99944, 943.61145)(168.2902, 3053.456)(171.04874, 4948.983)(153.03815, 1829.3766)
3-hydroxyanthranilate	2.35604e+06	941959	2.10424e+06	1.63274e+06	3-HYDROXY-ANTHRANILATE [ C7 H6 N O3, tgt=57.82, overall=57.82 ]			(153.03868, 3369.8323)(155.04118, 979.87213)(156.04349, 696.89215)(139.03232, 359.39453)(153.04025, 15078.57)(154.98073, 24470.107)(175.84874, 7292.753)(157.0156, 373.4885)
xanthine	1758081	2.92365e+06	1.69929e+06	1620614	XANTHINE [ C5 H4 N4 O2, tgt=75.60, overall=75.60 ]			(153.03935, 15214.752)(153.03993, 15761.874)(154.04214, 1998.685)(152.0558, 43504.902)(175.0194, 12227.476)(157.01187, 502.04166)
phenylthiourea	114457	27664.5	108512	26729.9	CPD-7084 [ C7 H8 N2 S, tgt=44.92, overall=44.92 ]			(153.19325, 17256.293)(155.44052, 4746.044)(157.03854, 1977.405)(154.64299, 4799.39)(156.04367, 3841.3325)(170.07922, 1946.0938)(175.20186, 4553.8633)(176.03697, 312.67667)
vanillylamine	1.09852e+06	1.32288e+06	854098	734411	CPD-9327 [ C8 H12 N O2, tgt=40.18, overall=40.18 ]			(154.08502, 4835.427)(136.07341, 1539.3252)(156.58159, 1900.636)(160.10995, 204.14499)(138.09004, 5349.8223)(139.09279, 214.99925)(179.99925, 891.69556)(182.09038, 7177.929)
heptanoate	199378	58051.4	168370	277006	CPD-7619 [ C7 H13 O2, tgt=39.72, overall=39.72 ]			(154.08517, 2633.812)(114.090904, 738.54004)(132.1008, 326.91)(134.51245, 985.4199)(136.07373, 706.5662)
dopamine	1.09852e+06	1055264	279456	734411	DOPAMINE [ C8 H12 N O2, tgt=40.18, overall=40.18 ]			(154.0852, 6537.607)(136.07352, 1618.2618)(156.76878, 1372.1005)(160.10995, 204.14499)(138.09012, 5021.212)(139.0928, 220.73999)(179.96126, 813.655)(182.09041, 5678.422)
L-asparagine	60951.2	57660.8	86089.2	79669.9	ASN [ C4 H8 N2 O3, tgt=41.94, overall=41.94 ]			(155.04161, 6805.5273)(139.3672, 5997.2495)(141.20695, 12563.858)(142.04373, 1357.2272)
(<i>Z</i>)-phenylmethanethial <i>S</i>-oxide	190141	125346	15395.2	53120.8	CPD-12490 [ C7 H6 O S, tgt= ]			(156.04352, 4191.7876)(141.03912, 15160.444)(146.99294, 4015.5398)
2-isopropylmaleate	133068	114637	71091.8	123240	CPD-9451 [ C7 H8 O4, tgt=59.00, overall=59.00 ]			(156.04387, 3802.0535)(157.0391, 407.755)(139.03252, 4507.82)(141.0393, 13148.976)(142.04308, 1321.6367)(141.04, 12430.554)(142.04398, 864.7033)(157.07011, 59460.156)(158.07161, 9454.202)(159.06876, 7852.216)(165.03125, 2466.4407)(166.03072, 466.76)
(2<i>S</i>)-2-isopropyl-3-oxosuccinate	653631	565512	654705	536927	CPD-7100 [ C7 H8 O5, tgt=22.32, overall=22.32 ]			(157.03355, 1076.0125)(157.03766, 1086.7188)(172.05688, 38422.418)(173.05905, 7251.0405)(174.05562, 4709.816)(200.04274, 1431.9104)
N-methylethanolamine phosphate	653048	603525	657939	574949	CPD-406 [ C3 H9 N O4 P, tgt=27.60, overall=27.60 ]			(157.03442, 1120.6526)(157.03912, 978.58)(139.03195, 5696.995)(172.05688, 38496.09)(173.05905, 7265.908)(174.05562, 4717.7886)
3,5-dihydroxybenzoate / gentisate / protocatechuate	626618	1.24683e+06	644024	470807	CPD0-1274 [ C7 H5 O4, tgt=46.89, overall=46.89 ]			(157.0348, 1430.44)(172.00598, 1360.7834)(153.03957, 28257.607)(154.04222, 1694.3291)(176.00937, 14193.425)(177.01433, 276.70667)(178.0092, 293.6)
shikimate	227851	201257	232367	175146	SHIKIMATE [ C7 H9 O5, tgt=27.54, overall=27.54 ]			(157.03693, 1632.1846)(174.0556, 4914.199)(156.04385, 4449.7803)(157.0384, 467.86667)(200.3552, 15079.013)(201.04268, 52347.297)
6-hydroxy-2-cyclohexen-one-carboxylate	152052	141921	188085	92982	CPD-13172 [ C7 H7 O4, tgt=55.96, overall=55.96 ]			(157.03702, 1660.8712)(156.04385, 4479.6426)(157.0384, 480.29333)(139.03264, 4542.768)(141.03954, 14897.484)(142.04341, 1401.2603)(159.06828, 9017.869)(165.0302, 3343.87)
3,4,-dihydroxybutylphosphonate	2.02539e+06	1.83328e+06	1.72943e+06	939479	CPD0-2099 [ C4 H10 O5 P, tgt=49.94, overall=49.94 ]			(157.03702, 843.61)(187.0636, 100072.28)(188.06624, 9588.903)(169.58757, 5702.563)(170.04741, 4624.1543)(176.00969, 25364.84)(177.01433, 337.43668)(178.0092, 387.97)
(indole-3-yl)acetonitrile / 2,2'-dipyridyl	951560	907399	1.01544e+06	930801	INDOLEYL-CPD [ C10 H8 N2, tgt=71.10, overall=71.10 ]			(157.07008, 64701.12)(158.0716, 10341.738)
(<i>E</i>)-(indol-3-yl)acetaldehyde oxime / (<i>Z</i>)-indol-3-ylacetaldoxime / (indol-3-yl)acetamide	951560	907399	1.01544e+06	930801	INDOLE-3-ACETALDOXIME [ C10 H10 N2 O, tgt=71.10, overall=71.10 ]			(157.07008, 64701.12)(158.0716, 10341.738)(199.17067, 8023.0156)(200.0816, 366.82)
&alpha;-ethyl-L-glutamate	970604	914806	1.01544e+06	930801	CPD0-2267 [ C7 H12 N O4, tgt=58.71, overall=58.71 ]			(157.07008, 64811.977)(158.0716, 10359.1875)(159.06879, 8584.544)
(+)-isomenthol	420902	97737.2	184838	460164	CPD-4944 [ C10 H20 O, tgt=45.09, overall=45.09 ]			(157.1539, 13149.564)(157.15463, 14768.1045)(182.15181, 409.875)(161.13098, 1356.322)
(+)-neoisomenthol / (+)-neomenthol / (<i>S</i>)-(-)-citronellol	420902	97737.2	184838	460164	CPD-4945 [ C10 H20 O, tgt=45.09, overall=45.09 ]			(157.1539, 13149.564)(157.15463, 14768.1045)(182.15181, 409.875)(161.13098, 1356.322)
1,8-dihydroxy-3-methylnaphthalene	955159	851191	767187	904419	CPD-11688 [ C11 H10 O2, tgt=47.62, overall=47.62 ]			(158.00696, 13345.551)(159.00395, 8326.835)(159.06744, 7374.21)
orotate	114110	405402	1	141435	OROTATE [ C5 H3 N2 O4, tgt=29.60, overall=29.60 ]			(158.01915, 213.67001)(159.02165, 590.305)(159.02252, 304.29)(143.016, 225.05)(159.99051, 17102.541)
vanillin	55954.8	52392.5	68509.2	1	VANILLIN [ C8 H8 O3, tgt=73.01, overall=73.01 ]			(158.0715, 10267.316)(138.65463, 45204.32)(139.8064, 12152.883)(170.0796, 8645.78)(175.03523, 5645.6147)(176.0369, 318.2975)
3,4-dihydroxyphenylacetaldehyde / methylsalicylate	55954.8	1	38724.2	28495.6	34-DIHYDROXYPHENYLACETALDEHYDE [ C8 H8 O3, tgt=73.01, overall=73.01 ]			(158.0715, 10267.316)(138.94409, 47378.312)(139.85646, 11114.908)(170.0795, 6418.62)(175.03537, 5790.856)(176.0371, 319.15)
4-hydroxy-5-methyl-2-propyl-3(2H)-furanone	150562	160489	323026	260146	CPD-10210 [ C8 H12 O3, tgt=36.88, overall=36.88 ]			(158.07977, 7058.4087)(142.08511, 8363.645)(156.10057, 11378.084)
seleno-L-homocysteine / Se-methyl-L-selenocysteine	92152.4	73205.8	100065	67687.2	SELENOHOMOCYSTEINE [ C4 H9 N O2 Se, tgt=53.18, overall=53.18 ]			(158.97269, 10668.507)(178.99414, 11112.549)(180.40157, 1110.4108)(180.9926, 894.91077)(191.01672, 1646.8972)(202.11342, 1273.1871)(202.97037, 641.4175)(183.60475, 7011.828)(184.71007, 5690.1245)(184.95972, 5601.0146)
2-oxoadipate	1	20939	96662.2	82514	2K-ADIPATE [ C6 H6 O5, tgt= ]			(159.02245, 7447.348)(160.0217, 2674.6912)(185.01509, 1938.6057)(167.01175, 2728.0608)
(indol-3-yl)acetaldehyde	3.36808e+06	549620	1.60258e+06	1.67585e+06	INDOLE_ACETALDEHYDE [ C10 H9 N O, tgt=67.92, overall=67.92 ]			(159.06831, 8833.941)(141.05493, 533.35)(160.07463, 122358.03)(161.07753, 10773.396)(177.10043, 9668.613)(185.06487, 619887.1)(186.06699, 196504.77)(167.05379, 790.39185)
6,8-dihydroxypurine	1	47991.2	88325.6	93680.2	CPD-9016 [ C5 H6 N4 O2, tgt= ]			(159.06856, 10170.362)(140.61113, 4639.966)(141.05435, 549.76)(177.03354, 1902.3848)(159.02303, 7495.437)
&alpha;-fenchene / &beta;-myrcene / &gamma;-terpinene / (-)-&alpha;-pinene / (-)-&beta;-phellandrene / (-)-&beta;-pinene / (-)-camphene / (+)-&alpha;-pinene / (+)-&alpha;-thujene / (+)-&beta;-pinene / (+)-2-carene / (+)-3-carene / (+)-camphene /(<i>4R</i>)-limonene / (<i>E</i>)-&beta;-ocimene / (<i>Z</i>)-&beta;-ocimene / (4<i>S</i>)-limonene / terpinolene / tricyclene	459644	140351	469975	730813	CPD-12222 [ C10 H16, tgt=75.00, overall=75.00 ]			(159.11525, 1240.9271)(154.1577, 18213.557)(155.16098, 3956.1218)(137.13133, 37599.38)(138.13446, 2417.9072)
&alpha;-terpinene	892040	711771	1.04773e+06	730813	CPD-8735 [ C10 H16, tgt=75.00, overall=75.00 ]			(159.11525, 1240.9271)(154.1577, 30322.371)(155.16052, 3810.4934)(137.13133, 37599.38)(138.13446, 2417.9072)
1-(methylsulfanyl)-6-<i>aci</i>-nitrohexane	3.2662e+06	1.25175e+06	1.729e+06	1.44118e+06	CPD-12395 [ C7 H15 N O2 S, tgt=47.48, overall=47.48 ]			(160.07402, 41793.586)(180.82878, 1651.047)(182.09045, 4223.8545)(160.35321, 78422.375)(161.07755, 13157.103)(177.10068, 13736.922)(185.06416, 6477.2627)
L-dihomomethionine	2.77262e+06	663053	1.04747e+06	1.44118e+06	CPDQT-340 [ C7 H15 N O2 S, tgt=47.48, overall=47.48 ]			(160.07411, 44017.418)(180.75467, 1717.977)(182.09045, 4260.451)(160.30614, 90169.7)(161.07762, 14145.158)(177.10068, 13736.922)(185.06429, 6485.9434)
(+)-<i>trans</i>-isoalliin	1.2622e+06	910831	1.6808e+06	1.55847e+06	CPD-9307 [ C6 H11 N O3 S, tgt=46.15, overall=46.15 ]			(163.0371, 30347.1)(164.0402, 1372.62)(178.0565, 2394.81)(163.0381, 396548.94)(164.0409, 32419.89)(165.043, 1680.66)(199.07974, 487.6404)(177.06874, 19828.613)(201.04164, 9327.215)
5-(methylsulfanyl)-&alpha;-D-ribose	1	146642	1	1	CPD-560 [ C6 H12 O4 S, tgt= ]			(163.0372, 45174.11)(164.0405, 2442.31)
coumarinate	6.41479e+06	324405	1.2919e+06	1	CPD-7418 [ C9 H7 O3, tgt=65.50, overall=65.50 ]			(163.03761, 164360.98)(164.0407, 20420.316)(165.0429, 4109.255)(145.0272, 3732.8452)(147.0411, 5617.3535)
4-hydroxycoumarin	5998436	376305	89071.9	175804	CPD-12111 [ C9 H6 O3, tgt=33.07, overall=33.07 ]			(163.03767, 298494.75)(164.0407, 23212.64)(165.0429, 4109.255)(145.0272, 3732.8452)(167.64244, 23428.531)(168.0494, 42669.11)(145.0327, 6060.26)(184.072, 911.8633)(185.01562, 2046.0267)(167.01172, 2364.11)
anthranilate	1385422	1	252388	5.51345e+06	ANTHRANILATE [ C7 H6 N O2, tgt=81.08, overall=81.08 ]			(163.03775, 258668.47)(164.04062, 20549.818)(119.035164, 3802.7383)(137.04562, 347.32748)(138.054, 101633.98)(136.06161, 174347.77)(137.0624, 7396.2056)
adipate	1655527	1.54039e+06	1.4439e+06	1.50982e+06	ADIPATE [ C6 H8 O4, tgt=80.25, overall=80.25 ]			(163.07437, 2907.4475)(149.02219, 43064.934)(150.02528, 1977.9269)
<i>N</i><sup>5</sup>-methyl-L-glutamine	2.30322e+06	2.05831e+06	3.40404e+06	3.18037e+06	N5-METHYLGLUTAMINE [ C6 H12 N2 O3, tgt=60.47, overall=60.47 ]			(163.09492, 3146.2263)(178.12137, 79669.67)(179.12428, 7280.624)
(2S,3E)-2-amino-4-(2-aminoethoxy)but-3-enoate	202292	167263	286865	281194	CPD-13353 [ C6 H13 N2 O3, tgt=31.60, overall=31.60 ]			(163.095, 3435.768)(179.1243, 11074.732)
olivetol	12200000	11650000	12550000	11325000	CPD-11505 [ C11 H16 O2, tgt=93.40, overall=93.40 ]			(163.11024, 5508.3174)(181.12157, 474904.62)(182.12431, 47478.38)(183.12645, 2224.0356)(203.1024, 22999.81)(204.1055, 1036.6437)
&alpha;-monofluoromethylagmatine	1.17295e+06	859093	1.08781e+06	817686	CPD0-1661 [ C6 H15 F N4, tgt=66.22, overall=66.22 ]			(163.13133, 23857.379)(164.13483, 782.8115)(163.13199, 23334.82)(164.1358, 296.65002)(185.11327, 26184.805)(186.11575, 1141.4196)
(<i>S</i>)-nicotine	12292.5	1	115157	1	NICOTINE [ C10 H15 N2, tgt= ]			(164.13474, 532.99835)(186.11548, 1299.4432)
L-cysteinylglycine	33151.8	21497.9	1	1	CYS-GLY [ C5 H10 N2 O3 S, tgt= ]			(165.03044, 2939.325)(199.07913, 9688.042)(183.04788, 3087.6973)(185.01382, 1501.8026)
3-(sulfanylcarbamoyl)-L-alanine	977087	1	922514	520877	CPD0-1386 [ C4 H8 N2 O3 S, tgt=49.66, overall=49.66 ]			(165.0312, 568.62)(147.02196, 19747.451)(187.06358, 7650.1216)(168.04932, 2035.158)(169.05084, 371.61)(191.0162, 224.19)
dimethylsulfonio-2-hydroxybutanoate	1.44792e+06	680904	679814	229541	CPD-10470 [ C6 H12 O3 S, tgt=47.57, overall=47.57 ]			(165.05296, 9281.461)(147.04175, 5110.137)(169.33319, 1177.0264)(182.07954, 36706.535)(183.0824, 2361.4844)(165.61028, 537.6692)(169.033, 1007.84)
3-hydroxy-3-phenylpropanoate / melilotate	1.31047e+06	264629	989431	37600.1	CPD-12218 [ C9 H9 O3, tgt=70.96, overall=70.96 ]			(165.053, 3987.5933)(166.0601, 697.365)(148.99718, 2931.1062)(152.0557, 26340.35)(168.06355, 418.34335)(150.05673, 3677.985)(152.0668, 95.98)(191.21715, 1528.9578)(190.44731, 1173.26)
caffealdehyde	1.47325e+06	549049	745443	406490	CPD-18120 [ C9 H8 O3, tgt=77.93, overall=77.93 ]			(165.05319, 7835.5728)(147.04153, 3702.4238)(149.53314, 3471.07)(152.05594, 55943.395)(182.0797, 29177.771)(183.0824, 2361.4844)(165.67209, 479.71594)
(<i>E</i>)-6-(methylsulfanyl)hexanal oxime	336802	473315	279670	584974	CPDQT-343 [ C7 H15 N O S, tgt=61.19, overall=61.19 ]			(165.08908, 1614.8754)(144.03348, 16704.393)(165.48616, 5072.9854)(166.57791, 3520.5046)(167.10034, 307.945)(144.48051, 23273.78)(145.08345, 7011.75)(180.1227, 7554.4873)(162.10773, 2373.6177)(189.07278, 17709.576)
2-phospho-D-glycerate / 3-phospho-D-glycerate	1	1	36356.8	1	2-PG [ C3 H4 O7 P, tgt= ]			(165.9589, 396.98)(187.9906, 3246.21)
raphanusamate	1	12776.4	12476	1	CPDQT-331 [ C4 H4 N O2 S2, tgt= ]			(165.9594, 370.79498)(184.9595, 5511.76)
diethylpyrocarbonate	83026.4	116143	101479	113737	DIETHYLPYROCARBONATE [ C6 H10 O5, tgt=47.55, overall=47.55 ]			(166.0571, 319.94)(148.05913, 2828.4495)(180.08652, 6716.483)
<i>S</i>-(2-aminoethyl)-L-cysteine	315856	178515	283961	222254	S-2-AMINOETHYL-L-CYSTEINE [ C5 H13 N2 O2 S, tgt=58.69, overall=58.69 ]			(166.07166, 899.25665)(148.05917, 20143.809)(150.05678, 3159.8828)(152.05814, 7585.4736)(169.67863, 1519.2239)(152.06615, 278.565)(166.0956, 759.95)(192.05415, 2524.3254)(170.04764, 4699.017)
(3<i>R</i>)-&beta;-phenylalanine	9.26084e+06	9098900	5.35222e+06	2.28462e+06	CPD-14474 [ C9 H11 N O2, tgt=90.40, overall=90.40 ]			(166.08746, 442174.38)(167.08961, 36723.766)(168.09154, 867.80194)(188.06961, 198444.2)(189.07227, 20061.105)(190.07457, 600.46747)(170.05856, 3260.948)
triketide pyrone	863261	525367	1.19783e+06	743158	CPD-11507 [ C10 H13 O3, tgt=71.63, overall=71.63 ]			(166.08774, 445864.25)(167.08984, 36931.79)(168.09183, 1295.9504)(200.12766, 790.20355)(182.09055, 32239.926)(183.09378, 2469.077)
(+)-bornane-2,5-dione	1.06086e+06	1.14526e+06	1.59122e+06	1.54075e+06	CPD-864 [ C10 H14 O2, tgt=52.37, overall=52.37 ]			(166.09595, 43052.125)(167.09984, 3429.6643)(148.08545, 1662.1263)(149.09341, 231.802)(149.29543, 80090.49)(150.81754, 20594.518)(166.1206, 256.605)(192.0998, 5563.31)
(6<i>E</i>)-8-oxogeranial	881000	1.10758e+06	1.52952e+06	1.54075e+06	CPD-9978 [ C10 H14 O2, tgt=52.37, overall=52.37 ]			(166.09618, 48750.953)(167.09984, 3429.6643)(148.08545, 1662.1263)(149.09341, 231.802)(149.09384, 1799.2439)(150.10071, 292.805)(166.1206, 256.605)
pseudoephedrine	1	53419.4	155839	1	CPD-9954 [ C10 H15 N O, tgt= ]			(166.11873, 458.85336)(148.1105, 9011.427)(192.11076, 610.8171)
2,4-pyridinedicarboxylate / dipicolinate / quinolinate	202821	174195	124584	121999	CPD-7050 [ C7 H3 N O4, tgt=34.01, overall=34.01 ]			(167.01157, 1826.8373)(146.99335, 2855.0269)(167.0122, 1494.84)(185.03963, 674.8768)(165.0312, 2199.5344)(166.03069, 291.29498)(187.99107, 1477.331)
allicin / thiosulfinate	338547	201284	201701	123363	CPD-9275 [ C6 H10 O S2, tgt=42.47, overall=42.47 ]			(167.01193, 1605.7063)(144.00389, 6198.392)(145.00677, 495.14502)(145.01427, 776.192)(146.01085, 486.65994)(183.04866, 2232.8606)(166.03108, 483.09836)
L-2-amino-4-oxo-5-chloropentanoate	482813	305252	81388.4	226874	CPD0-1224 [ C5 H8 Cl N O3, tgt= ]			(167.01208, 1826.3999)(166.03012, 432.444)(183.04886, 3441.1226)(170.04753, 4380.3228)(171.0489, 4484.9893)(176.0094, 7664.51)
enol-phenylpyruvate	10737.4	1	1	1	ENOL-PHENYLPYRUVATE [ C9 H7 O3, tgt=36.30, overall=36.30 ]			(167.0541, 1534.98)(168.0497, 45465.66)(188.0356, 7213.35)
L-dihydrophenylalanine	1.10065e+06	635467	785774	351448	CPD0-1557 [ C9 H13 N O2, tgt=36.09, overall=36.09 ]			(167.0902, 36807.36)(168.09186, 1018.8561)
4-(1-methyl-2-pyrrolidinyl)-3-oxobutanoate	932550	477546	684047	278956	CPD-9779 [ C9 H15 N O3, tgt=36.09, overall=36.09 ]			(167.0902, 38048.71)(168.09184, 1173.2506)(189.12119, 2465.7156)(203.13713, 8687.494)
1-naphthol / 2-naphthol	1.33306e+06	1.0174e+06	1.36569e+06	1.25441e+06	NAPHTHOL [ C10 H8 O, tgt=79.91, overall=79.91 ]			(167.105, 798.66895)(144.07973, 55872.164)(145.083, 4558.5225)
ethiin	108859	126806	109280	107426	CPD-9280 [ C5 H11 N O3 S, tgt=56.80, overall=56.80 ]			(167.45842, 16998.91)(168.4564, 26504.918)(169.25868, 6720.9087)(170.04808, 5659.187)(188.03659, 8127.7188)(189.04193, 685.4812)(173.06366, 1462.4635)
umbelliferone	25558.6	82578.8	89071.9	175804	CPD-8186 [ C9 H6 O3, tgt=33.07, overall=33.07 ]			(167.64244, 23428.531)(168.0494, 42669.11)(145.0327, 6060.26)(184.072, 911.8633)(185.01562, 2046.0267)(167.01172, 2364.11)
dimethylselenopropanoate-amine	1.6194e+06	3.35043e+06	5.65611e+06	1.17208e+06	CPD-13719 [ C5 H15 N Se, tgt=59.02, overall=59.02 ]			(167.70097, 1723.6772)(165.34317, 5084.1885)(168.34988, 2123.92)(170.0475, 4403.5703)(182.07976, 7219.685)(184.34412, 707.525)(190.06906, 251.151)(192.96376, 1378.6315)(199.07762, 1410.0679)
7,8-dihydropterin	683794	455118	631004	527354	CPD0-1718 [ C6 H7 N5 O, tgt=44.61, overall=44.61 ]			(167.71152, 442.4141)(148.05934, 16051.1)(183.09955, 7746.1396)(165.08907, 2364.386)(170.04726, 780.39667)
4- fluoroglutamate	108859	126806	107059	107426	4--FLUOROGLUTAMATE [ C5 H8 F N O4, tgt=55.24, overall=55.24 ]			(168.01845, 38976.242)(169.01971, 8065.292)(169.0502, 5907.8)(167.05385, 812.8462)(188.03621, 8217.215)(189.04172, 553.935)(175.03516, 6017.625)
(R)-3,4-dihydroxymandelonitrile / HBOA	108021	126806	92311	96044.4	CPD-14592 [ C8 H7 N O3, tgt=65.67, overall=65.67 ]			(168.04927, 38964.156)(169.05075, 7111.8667)(167.30286, 11205.18)(168.05014, 45028.816)(188.1721, 7854.0825)(189.04137, 521.3314)(175.0351, 6078.178)
9H-purine-2,6,8-triol / urate	1.58873e+06	1.7586e+06	1.5398e+06	3390454	CPD-15332 [ C5 H4 N4 O3, tgt=47.40, overall=47.40 ]			(169.03291, 4723.687)(186.19113, 104680.45)(187.18869, 65385.656)(168.19812, 25825.416)(169.05132, 6920.859)(170.0478, 4704.041)(191.01715, 1511.6599)(176.00902, 22174.393)(177.0157, 228.33)
(<i>Z</i>)-2-phenyl-1-thioacetohydroximate	1	1	54080.9	1	PHENYLACETOTHIOHYDROXIMATE [ C8 H8 N O S, tgt= ]			(169.03294, 2173.1335)(184.07117, 6093.5034)(176.00908, 6635.7866)
(<i>S</i>)-2,3-dihydrodipicolinate	6.23735e+06	7.46027e+06	8.88391e+06	573729	2-3-DIHYDRODIPICOLINATE [ C7 H5 N O4, tgt=53.08, overall=53.08 ]			(169.03366, 2127.8809)(187.06349, 87703.48)(188.14958, 7834.818)(168.04948, 25634.893)(169.39886, 5663.6914)(171.53021, 25664.188)(172.05702, 35177.69)(191.01665, 1275.9457)(176.0097, 9413.142)(177.01433, 153.72667)
10-hydroxydecanoate	140430	35294	233058	124992	10-HYDROXYDECANOATE [ C10 H19 O3, tgt=46.24, overall=46.24 ]			(169.12077, 10250.77)(205.16791, 3429.6506)(211.13112, 1632.9229)
N-dimethylethanolamine phosphate	942987	1.68378e+06	1.168e+06	3.09661e+06	CPD-5441 [ C4 H11 N O4 P, tgt=51.83, overall=51.83 ]			(170.04677, 4239.0034)(171.04814, 4750.8833)(153.03815, 1791.6542)(155.04155, 6558.965)(169.0511, 7393.17)(170.04765, 5070.571)(191.03471, 465.65503)(173.52142, 1475.2422)
L-&alpha;-amino-&epsilon;-keto-pimelate	129042	89009.5	19473.1	1	L-ALPHA-AMINO-EPSILON-KETO-PIMELATE [ C7 H10 N O5, tgt=19.59, overall=19.59 ]			(170.04707, 5173.999)(190.06915, 1255.4432)(171.0484, 5003.9014)(214.0567, 354.96)(193.03265, 7210.4614)
(<i>S</i>)-2,3,4,5-tetrahydrodipicolinate / L-2,3-dihydrodipicolinate	2116495	1.98168e+06	2.21301e+06	2.07007e+06	DELTA1-PIPERIDEINE-2-6-DICARBOXYLATE [ C7 H7 N O4, tgt=57.83, overall=57.83 ]			(170.04752, 4654.318)(153.03812, 1679.7971)(155.04152, 6113.883)(156.04384, 4148.056)(175.01706, 6802.695)
(2E)-2-butylidene-4-hydroxy-5-methyl-3(2H)-furanone / 1,3,5-trimethoxybenzene	108790	103548	107608	103386	CPD-10208 [ C9 H12 O3, tgt=45.13, overall=45.13 ]			(170.07904, 2432.505)(189.12076, 938.01)(173.05911, 7545.8354)(174.05566, 4906.0493)
pyridoxine	26455.8	1	1	1	PYRIDOXINE [ C8 H11 N O3, tgt= ]			(170.07935, 6293.93)(194.0651, 1174.645)
6-isobutyl-4-hydroxy-2-pyrone	901150	228502	149499	802769	CPD-7146 [ C9 H11 O3, tgt=58.95, overall=58.95 ]			(170.08014, 954.3846)(149.2736, 4565.921)(150.0545, 753.22675)(170.0795, 2780.6)(167.09064, 39810.355)(168.09215, 2054.9814)(194.0651, 2695.05)
1-naphthoate	501388	1.22985e+06	159707	540335	CPD-7615 [ C11 H7 O2, tgt=40.22, overall=40.22 ]			(171.04861, 4807.236)(154.73349, 5822.581)(156.04413, 4654.95)(172.67384, 20329.72)(173.67255, 5855.8184)(175.91005, 4570.1323)(154.2087, 2690.4973)(156.04335, 3584.295)(199.04286, 4469.918)
decanoate	87377.6	91149.2	128497	150506	CPD-3617 [ C10 H19 O2, tgt=35.30, overall=35.30 ]			(171.13635, 1380.9286)(153.1263, 9773.594)(156.1374, 1506.2244)
(6<i>E</i>)-8-hydroxygeraniol	84180.1	208091	162486	165622	CPD-7857 [ C10 H18 O2, tgt=46.42, overall=46.42 ]			(171.13702, 909.8721)(171.13644, 474.47)(154.93256, 7251.1504)(193.12027, 1947.417)(175.10982, 8004.434)
<i>N</i>-acetyl-L-glutamate 5-semialdehyde	620775	566230	626798	593329	CPD-469 [ C7 H10 N O4, tgt=43.51, overall=43.51 ]			(172.05685, 37654.555)(173.05905, 7108.1587)(174.05562, 4613.7837)(159.06825, 8417.685)
(2E,4E,6E)-4-methylocta-2,4,6-trienedial / 4-coumaryl alcohol / benzyl acetate	195852	184951	203097	191417	CPD-13370 [ C9 H10 O2, tgt=45.13, overall=45.13 ]			(173.05908, 7564.529)(174.0556, 4915.232)(155.04227, 6412.42)
L-azaserine	133307	116244	135355	130721	L-AZASERINE [ C5 H8 N3 O4, tgt=23.45, overall=23.45 ]			(174.0554, 5040.309)(156.04385, 4528.9053)(157.03844, 493.82666)(177.06808, 3968.48)(200.62468, 1673.6866)(201.83566, 12355.407)(202.0483, 2464.9824)
(indol-3-yl)acetate	134886	119355	135933	129142	INDOLE_ACETATE_AUXIN [ C10 H8 N O2, tgt=45.89, overall=45.89 ]			(174.05562, 4987.562)(156.04385, 4521.3276)(157.0384, 479.85)(177.06877, 4213.536)(183.0486, 2658.183)
(2<i>R</i>,3<i>S</i>)-3-isopropylmalate / (2<i>S</i>)-2-isopropylmalate	134864	119355	135933	130721	2-D-THREO-HYDROXY-3-CARBOXY-ISOCAPROATE [ C7 H10 O5, tgt=27.54, overall=27.54 ]			(174.05562, 4998.6816)(156.04385, 4530.3994)(157.0384, 479.85)(177.06877, 4178.646)(202.04865, 2619.655)
2D-5-<i>O</i>-methyl-2,3,5/4,6-pentahydroxycyclohexanone	111089	76758.6	36379.6	66078.8	PENTAHYDROXYCYCLOHEXANONE [ C7 H12 O6, tgt=45.72, overall=45.72 ]			(174.05573, 4542.375)(177.0689, 2673.7673)(220.06575, 727.7422)(202.05162, 7267.075)
sulfanilamide	587156	522041	583996	537822	CPDQT-42 [ C6 H8 N2 O2 S, tgt=68.01, overall=68.01 ]			(174.86578, 4535.7817)(177.03249, 1619.6068)(157.01698, 2250.0518)(159.02196, 2454.2961)(175.03534, 5864.011)(176.84166, 1339.3938)(177.0332, 2166.95)(159.02234, 5622.0254)(172.05685, 38249.805)(173.05905, 7219.483)(174.05565, 4672.63)
L-dehydro-ascorbate	131739	129088	103710	89114.4	L-DEHYDRO-ASCORBATE [ C6 H6 O6, tgt=75.38, overall=75.38 ]			(175.0163, 590.525)(176.80075, 3647.1418)(157.22424, 2429.9875)(192.05412, 4023.4143)(193.0539, 402.21)(199.00546, 990.0931)(179.38214, 16032.887)(179.99516, 1940.0302)(180.99255, 1592.6608)
3-dimethylselenopropionaldehyde	1	46521.8	36768.8	34929	CPD-13720 [ C5 H11 O Se, tgt= ]			(175.01692, 3953.0684)(167.01202, 2858.4702)(175.018, 2450.9226)(144.00371, 8246.533)(148.2023, 1851.1201)(157.61887, 4628.848)(159.02216, 4686.65)(188.0369, 7284.453)(189.04135, 383.88602)(174.13463, 4845.221)(186.99243, 3105.654)(187.99112, 1504.9779)(178.99423, 10230.831)(179.99538, 1186.4774)
<i>sn</i>-glycerol 3-phosphate / glycerol 2-phosphate	108021	126806	92311	96044.4	GLYCEROL-3P [ C3 H7 O6 P, tgt=21.52, overall=21.52 ]			(175.01707, 6262.3984)(188.1721, 7854.0825)(189.04137, 521.3314)(175.0351, 6078.178)
L-dopachrome	844848	456731	1.41398e+06	1.54297e+06	L-DOPACHROME [ C9 H6 N O4, tgt=19.92, overall=19.92 ]			(175.0193, 10227.025)(193.03273, 3767.4795)(177.03284, 1292.2042)(211.15611, 10400.284)(211.06166, 281.26627)(192.05363, 2727.0957)(193.0538, 326.8)(215.67505, 11783.701)(219.02487, 69843.08)(220.02722, 4655.0415)(197.0034, 301.46)
serinol phosphate	42586	34745.8	45261.2	1	CPD-12266 [ C3 H9 N O5 P, tgt=23.63, overall=23.63 ]			(175.03494, 6262.6167)(154.34541, 2196.67)(157.01785, 1716.9951)(170.04726, 5352.4253)
&beta;-2-thienyl-D,L-Alanine	368332	11926.1	583363	120066	CPD0-1558 [ C7 H9 N O2 S, tgt=42.40, overall=42.40 ]			(175.03505, 1649.8934)(157.0298, 541.02)(189.07214, 32695.975)(190.07452, 628.14667)(172.3069, 12551.531)(173.55661, 6765.1904)(174.05545, 4985.4)(176.00928, 23302.854)(177.01433, 347.44998)(178.0092, 417.81)
juglone	168447	141494	157370	154761	HYDROXYNAPHTHOQUINONE [ C10 H6 O3, tgt=74.89, overall=74.89 ]			(175.03513, 4988.5156)(176.0371, 334.11996)(157.03058, 444.8075)(174.05559, 4045.0195)
ferulate	48838.9	1	36098.8	1	FERULIC-ACID [ C10 H9 O4, tgt=39.13, overall=39.13 ]			(175.03523, 5556.904)(176.0369, 313.315)(211.07974, 597.04504)(201.0424, 43779.203)
5,7-dihydroxy-2-methylchromone / 7-hydroxy-8-methoxycoumarin / isoscopoletin / scopoletin	36690.5	1	23712.2	12961.6	CPD-0 [ C10 H8 O4, tgt=46.97, overall=46.97 ]			(175.03549, 6240.1)(176.037, 352.56)(211.07985, 652.79)
3-dehydroshikimate	551166	310569	647540	386117	3-DEHYDRO-SHIKIMATE [ C7 H7 O5, tgt=46.89, overall=46.89 ]			(175.0356, 359.3294)(172.05629, 924.05426)(176.00937, 20144.514)(177.01433, 344.7667)(178.0092, 417.81)
(-)-<i>trans</i>-carveol / (-)-trans-isopiperitenol / (+)-<i>cis</i>-isopulegone / (+)-<i>trans</i>-carveol / (+)-camphor / (+)-pulegone / (4<i>S</i>)-perillyl alcohol / geranial / neral	92004.2	155037	226630	479246	CPD-10051 [ C10 H16 O, tgt=45.83, overall=45.83 ]			(175.10976, 7232.905)(135.11583, 10132.892)(136.1193, 179.83499)(155.31563, 5490.502)
&gamma;-glutamyl-ethylamide / <i>N</i>-acetyl-L-ornithine / <i>N<sup>5</sup></i>-acetyl-L-ornithine	21947.4	87804.5	80689.8	161298	CPD-9384 [ C7 H14 N2 O3, tgt= ]			(175.11024, 9682.567)(192.77933, 2276.2573)(177.1263, 581.8333)
phenylmethanesulfonyl fluoride	109125	128775	101276	89424.5	CPD-5541 [ C7 H7 F O2 S, tgt=93.37, overall=93.37 ]			(175.34851, 4483.563)(176.00902, 633.0567)(157.0115, 1505.67)(157.01637, 2546.7634)(192.05386, 3819.2043)(193.0539, 402.21)(175.98956, 4444.6387)(176.95682, 2554.7263)(177.0336, 3972.97)(199.00525, 989.5667)(178.99413, 17709.418)(179.99516, 1950.952)(180.99255, 1602.8575)
&gamma;-thiomethyl glutamate	128181	140008	225590	178906	CPD0-2023 [ C6 H11 N O4 S, tgt=39.19, overall=39.19 ]			(175.7862, 1582.2524)(176.0379, 341.53)(215.07426, 3438.8298)(194.0654, 2295.3687)(218.76726, 8756.498)(219.15059, 53725.977)(220.02776, 4318.0303)
<i>iso</i>-arabidopaldehyde / arabidopaldehyde	557607	400512	652784	515576	CPD-18133 [ C9 H5 O5, tgt=41.16, overall=41.16 ]			(176.00937, 19285.52)(177.01433, 334.4)(178.0092, 402.34)(214.05652, 788.2767)(193.0326, 1311.6101)(217.0117, 272.475)(203.00203, 868.0094)
3-(2-propenoic acid)-4,6-hydroxy cyclohexa-2,5-dienone	550152	408290	620673	525711	CPD-8095 [ C9 H6 O5, tgt=55.41, overall=55.41 ]			(176.00937, 20104.51)(177.01433, 365.18335)(178.0092, 452.63)(200.0431, 291.51)(214.05652, 859.92)(221.02364, 6095.424)(222.02693, 1585.1792)
L-ascorbate / monodehydroascorbate radical	1.39887e+06	2.22457e+06	1129678	83913.4	ASCORBATE [ C6 H7 O6, tgt=44.70, overall=44.70 ]			(176.02701, 6388.815)(157.01518, 558.5073)(177.0338, 177.72)(159.0219, 692.4384)(160.0214, 279.97)(194.06564, 1732.6278)(185.01408, 263.52573)
<i>N</i>-carbamoyl-L-aspartate	229683	210856	194677	203339	CARBAMYUL-L-ASPARTATE [ C5 H6 N2 O5, tgt=86.33, overall=86.33 ]			(176.35588, 2412.0156)(177.03271, 1342.8467)(157.01724, 1597.8391)(159.0222, 3998.4536)(160.02138, 1727.0361)(175.03539, 5176.9937)(176.0371, 342.128)(174.0554, 4119.801)
D,L-&alpha;-methylphosphinothricin	748454	673837	401070	48072.1	CPD0-1248 [ C6 H13 N O4 P, tgt=65.64, overall=65.64 ]			(177.05714, 28417.59)(178.05702, 1702.3047)(195.06314, 11766.17)(201.04163, 5062.0786)
4-methoxycinnamate	637496	560354	390642	419672	CPD-11884 [ C10 H9 O3, tgt=54.83, overall=54.83 ]			(177.05727, 27621.2)(178.05722, 1497.2845)(179.0681, 237.46)(160.05536, 454.195)(196.09518, 1403.3925)(178.08427, 1160.448)(201.04239, 5714.795)
4-methylumbelliferone	706117	284204	334946	115282	CPD-182 [ C10 H8 O3, tgt=51.70, overall=51.70 ]			(177.05727, 28638.732)(178.05693, 1934.9412)(201.04184, 5575.7866)
herniarin	706117	201247	334946	115282	CPD-9828 [ C10 H8 O3, tgt=51.70, overall=51.70 ]			(177.0573, 28608.178)(178.057, 2014.175)(201.04187, 5691.9146)
4-hydroxy-4-methyl-L-glutamate	424197	494337	550297	334824	CPD-15319 [ C6 H10 N O5, tgt=78.36, overall=78.36 ]			(177.05824, 14109.733)(178.05737, 833.81494)(163.05806, 60.076664)(177.0658, 11212.739)(178.0576, 168.75)(160.0554, 181.71375)(195.721, 917.5475)(196.09454, 400.69003)(178.33449, 436.02628)(180.08646, 112.765)
&gamma;-methylphosphinothricin	106164	1	302467	48072.1	CPD0-1249 [ C6 H13 N O4 P, tgt=65.64, overall=65.64 ]			(177.05908, 21356.076)(178.057, 1415.2)(195.0634, 13881.24)(201.04144, 4280.0884)
6-methyl-H2-pterin	321544	500857	333564	435548	CPD0-1715 [ C7 H7 N5 O, tgt=55.71, overall=55.71 ]			(177.06691, 10189.265)(178.0574, 190.0)(160.87457, 239.33545)(195.4038, 4433.697)
6-(hydroxymethyl)-7,8-dihydropterin	512407	301461	268214	415186	AMINO-OH-HYDROXYMETHYL-DIHYDROPTERIDINE [ C7 H9 N5 O2, tgt=45.51, overall=45.51 ]			(177.06755, 10131.903)(178.0576, 304.925)(216.12099, 612.9667)(218.11551, 350.54498)(195.31372, 5009.9956)
1-<i>O</i>-methyl-<i>scyllo</i>-inositol / D-ononitol / D-pinitol / methyl &beta;-D-glucoside / methyl-&beta;-D-galactoside / sequoyitol	1.54594e+06	1.30184e+06	984620	785267	CPD-8063 [ C7 H14 O6, tgt=41.61, overall=41.61 ]			(177.06836, 10408.23)(196.0949, 689.77997)(180.01501, 937.81354)(182.01357, 6172.8413)(182.0905, 10573.17)(216.12099, 597.54266)(198.11078, 957.7058)(217.06981, 1395.5364)
caffeine	872757	472797	741607	1.21739e+06	1-3-7-TRIMETHYLXANTHINE [ C8 H10 N4 O2, tgt=47.56, overall=47.56 ]			(177.06873, 10342.341)(180.23509, 1327.5273)(182.09053, 6888.444)(216.12106, 622.83954)(198.11087, 861.9874)(217.06982, 2256.609)
1,4-naphthoquinone	105008	114866	1	81516.9	CPD0-954 [ C10 H6 O2, tgt=14.74, overall=14.74 ]			(177.06921, 2337.114)(159.06764, 4850.2754)(185.0399, 889.8174)
O-ureido-L-homoserine	926803	666581	768646	1.7413e+06	O-UREIDOHOMOSERINE [ C5 H11 N3 O4, tgt=68.61, overall=68.61 ]			(177.0693, 10714.792)(180.8889, 1326.782)(182.09126, 4783.517)(160.07498, 50146.57)(161.07803, 4690.1323)(197.16841, 44352.54)(198.1181, 4369.7207)(199.12108, 159.86778)(178.7407, 5671.847)(180.1081, 442.66278)(205.07858, 48.238)(185.06482, 6255.068)
<i>N</i>-hydroxyl-tryptamine	19137.5	1	44183	194350	N-HYDROXYL-TRYPTAMINE [ C10 H12 N2 O, tgt=29.86, overall=29.86 ]			(177.1006, 12436.14)(158.07985, 9440.122)(159.0905, 6416.46)(179.62674, 473.4675)(199.08011, 9678.85)(200.082, 372.61)
(-)-(4<i>S</i>)-&alpha;-terpineol / (-)-<i>endo</i>-fenchol / (-)-borneol / (-)-menthone / (+)-borneol / (+)-isomenthone / (3R)-linalool / (3S)-linalool / 1,8-cineole / geraniol / nerol	631796	468878	863166	807876	CPD-4887 [ C10 H18 O, tgt=75.00, overall=75.00 ]			(177.12558, 24681.191)(178.12854, 3325.4905)(137.1314, 33577.035)(138.13446, 2328.4214)(156.13815, 4841.288)(172.1685, 5676.168)(159.11523, 8705.449)(154.15782, 21844.87)(155.16098, 4028.9902)
D-phenylhydantoin	1.1511e+06	433586	929030	530652	PHENYLHYDANTOIN [ C9 H8 N2 O2, tgt=46.37, overall=46.37 ]			(177.20242, 5814.2075)(179.0684, 327.56665)(161.45682, 369.56873)(177.06699, 10762.784)(178.0576, 174.47)(160.055, 61.77)(195.6298, 972.7167)(178.30688, 533.4478)(180.08693, 100.41333)(200.05615, 90.465)(181.04245, 171.01999)
coniferaldehyde	20669	272891	216150	444743	CONIFERYL-ALDEHYDE [ C10H10O3, tgt= ]			(178.0579, 148.38333)(196.09532, 4125.287)(178.08455, 3059.6733)
L-arginine	39379.6	56366.2	145666	124506	ARG [ C6 H15 N4 O2, tgt=37.97, overall=37.97 ]			(178.1218, 13729.223)(160.1108, 244.52)(181.13246, 6110.7925)(198.11092, 8587.946)(183.10011, 3943.3418)
dimethylselenoniopropanoate	539366	548763	629201	535125	CPD-13770 [ C5 H10 O2 Se, tgt=62.06, overall=62.06 ]			(178.99413, 10573.518)(179.99524, 1131.5067)(180.9929, 879.6461)(159.99046, 623.5477)(185.01437, 1589.222)(200.97134, 2132.9148)(202.96983, 563.1223)(182.96121, 20937.283)(183.96223, 5109.3174)(184.95941, 5340.297)
3-methylphosphoenolpyruvate	160574	200188	216498	161080	CPD0-1555 [ C4 H4 O6 P, tgt=48.60, overall=48.60 ]			(178.99416, 11787.571)(179.99524, 1262.2759)(180.99261, 1056.1564)(202.9697, 590.2447)(184.95937, 5936.5444)
4,5-dihydroxyisophthalate	120899	187638	197295	177044	CPD0-1263 [ C8 H4 O6, tgt=80.06, overall=80.06 ]			(178.99431, 11705.533)(179.99538, 1184.8817)(180.99292, 874.286)(199.00519, 573.1434)(215.0388, 3957.22)(201.04175, 58705.31)
iproniazid	1.02102e+06	927770	777125	737497	IPRONIAZID [ C9 H13 N3 O, tgt=84.04, overall=84.04 ]			(179.1052, 35460.035)(180.10812, 2587.6492)(161.09454, 2221.5173)(163.1102, 246.88)
L-threonine 3-O-phosphate / O-phospho-L-homoserine	166620	248654	217104	221153	L-THREONINE-O-3-PHOSPHATE [ C4 H8 N O6 P, tgt=47.15, overall=47.15 ]			(179.6207, 7968.542)(179.99529, 1177.2627)(180.99251, 958.2539)(185.01442, 1622.161)(215.03773, 7218.12)(200.6361, 11183.507)(201.0428, 44309.57)(202.0485, 4910.855)
<i>S</i>-<i>trans</i>-1-propenyl-L-cysteine / <i>S</i>-allyl-L-cysteine	251188	69652.8	114317	1	CPD-17436 [ C6 H11 N O2 S, tgt= ]			(180.0864, 1403.874)(182.0897, 1171.25)(161.07724, 13801.518)
(S)-pyrethrolone / butyl benzoate / isomethyleugenol / methyleugenol	2.29843e+06	2077034	3.38853e+06	3.17489e+06	CPD-13661 [ C11 H14 O2, tgt=74.32, overall=74.32 ]			(180.0998, 545.32495)(163.09492, 3140.5027)(164.1057, 264.1525)(196.13123, 839.5)(178.12137, 79543.67)(179.12428, 7269.395)(204.1, 1947.0624)
2,4-dihydroxycinnamate	845039	181824	1.17235e+06	94582.4	CPD-9800 [ C9 H8 O4, tgt=36.50, overall=36.50 ]			(181.04312, 1182.311)(163.0371, 47024.88)(164.0403, 2570.96)(185.0648, 1880.675)(163.03781, 54468.254)(164.0407, 10168.022)
L-phosphinothricin	845039	386507	1.17235e+06	75853.4	L-PHOSPHINOTHRICIN [ C5 H11 N O4 P, tgt=32.33, overall=32.33 ]			(181.04327, 1077.6774)(163.0371, 47024.88)(164.0403, 2570.96)(185.0636, 1844.03)(163.03773, 49567.453)(164.04066, 8203.545)
5-deoxy-D-glucuronate	433795	299441	485078	419379	CPD-15127 [ C6 H9 O6, tgt=50.76, overall=50.76 ]			(181.04366, 318.92224)(163.03773, 25770.225)(164.04073, 9802.107)(165.053, 28.54)(199.0797, 1677.39)(200.0814, 57.06)(177.06152, 14690.771)(178.05734, 638.186)
2-amino-4-methyl-5-hydroxyethylthiazole	313301	965235	1.4909e+06	102439	CPD-15755 [ C6 H11 N2 O S, tgt=17.54, overall=17.54 ]			(181.33908, 3546.911)(182.0909, 3092.9126)(161.07735, 6623.318)(164.0402, 6809.9434)
harmalol	970716	216909	1.09967e+06	371800	CPD-9938 [ C12 H12 N2 O, tgt=47.60, overall=47.60 ]			(182.07895, 24969.95)(206.11588, 1331.06)(183.09373, 1922.5101)(219.22272, 10045.371)(220.1406, 1267.53)(227.1002, 1537.9451)
D-mannitol / D-sorbitol / galactitol / L-iditol	1.16798e+06	533974	527798	124254	MANNITOL [ C6 H14 O6, tgt=76.83, overall=76.83 ]			(182.07956, 32791.348)(183.0824, 2355.213)(165.71901, 486.18997)(190.06908, 828.60406)
L-tyrosine	986200	470210	511147	123598	TYR [ C9 H11 N O3, tgt=50.62, overall=50.62 ]			(182.0796, 33516.074)(183.0824, 2300.0386)(166.07187, 627.4923)(164.0721, 433.67)
lathyrine	1169678	1.04079e+06	525959	124254	LATHYRINE [ C7 H10 N4 O2, tgt=87.13, overall=87.13 ]			(182.0796, 33998.78)(183.0824, 2350.9253)(165.67209, 492.3653)(189.37549, 31784.842)(188.0656, 9467.887)
dihydroconiferyl alcohol / iridotrial	729019	604355	1.42725e+06	882866	CPD-94 [ C10 H14 O3, tgt=71.51, overall=71.51 ]			(182.09074, 27905.244)(183.09389, 2230.7124)(166.08781, 359458.03)(167.0899, 29530.246)(168.09186, 970.6591)(166.09595, 18457.059)(167.0988, 936.95)(200.12686, 4029.707)
4-methoxy-3-indolylmethylamine	818965	437493	708153	711610	CPDQT-436 [ C10 H13 N2 O, tgt=72.76, overall=72.76 ]			(182.11566, 457.82248)(181.12076, 43813.984)(182.12366, 4065.375)(195.13602, 5677.4478)(196.14, 261.47)(177.12595, 26977.402)(178.1289, 2120.7766)(203.10165, 2200.8901)(182.07957, 55052.324)(183.08229, 3143.0635)
1,5-dideoxy-1,5-imino-D-galactitol / 1-deoxymannojirimycin	1.10723e+06	1.0453e+06	1.16124e+06	1.05876e+06	15-DIDEOXY-15-IMINO-D-GALACTITOL [ C6 H14 N O4, tgt=69.34, overall=69.34 ]			(182.12431, 47395.14)(183.12645, 2215.6587)
L-isowillardiine / L-willardiine	131202	124325	137120	125903	ISOWILLARDIINE [ C7 H9 N3 O4, tgt=51.93, overall=51.93 ]			(183.04863, 2735.3867)(185.0653, 1045154.44)(186.06696, 197603.34)(187.06398, 144410.45)(199.07991, 9369.232)(200.08203, 402.97665)
<i>N</i>-methyl-L-glutamate / L-2-aminoadipate	1	1	1	43959.1	CPD-404 [ C6 H10 N O4, tgt= ]			(183.04951, 2730.6475)(168.05032, 44590.664)(169.05168, 7986.3926)(170.04819, 5448.747)
3-hydroxy-5-methoxybiphenyl	1.04823e+06	202386	145877	1	CPD-18574 [ C13 H12 O2, tgt=36.14, overall=36.14 ]			(183.08238, 2765.024)(228.08432, 1541.6869)
difluoromethylornithine	17275000	9.3375e+06	11437500	8.52593e+06	DIFLUOROMETHYLORNITHINE [ C6 H13 F2 N2 O2, tgt=98.72, overall=98.72 ]			(183.09384, 2066.092)(166.08772, 484243.28)(167.08986, 40636.125)(168.09175, 1500.9033)(186.1114, 1757.14)(166.08846, 373273.0)(167.09053, 30861.607)(168.09181, 892.2727)(208.09334, 1000.57007)(188.07011, 100696.125)(189.0728, 9286.96)
(R)-3-(4-hydroxyphenyl)lactate	6.45962e+06	404781	1.34466e+06	125903	CPD-2222 [ C9 H9 O4, tgt=66.68, overall=66.68 ]			(183.72142, 348903.97)(186.06659, 197089.34)(166.45442, 83129.59)(166.36148, 31353.066)(165.0429, 4109.255)(185.06544, 1059142.0)(186.06712, 200501.61)(187.06479, 142746.64)(167.0544, 964.35333)(199.08003, 9470.056)(200.08203, 402.97665)(188.03694, 7942.5566)(189.04156, 592.35333)(191.0364, 421.97)
methylphoracetophenone	67780	95493.5	104891	125903	CPD-9638 [ C9 H9 O4, tgt=66.68, overall=66.68 ]			(183.72142, 348903.97)(186.06659, 197089.34)(167.59334, 22885.803)(168.04936, 39265.69)(185.06544, 1059142.0)(186.06712, 200501.61)(187.06479, 142746.64)(167.0544, 964.35333)(199.08003, 9470.056)(200.08203, 402.97665)(188.03694, 7942.5566)(189.04156, 592.35333)(191.0364, 421.97)
paraxanthine	359100	217295	271693	261363	1-7-DIMETHYLXANTHINE [ C7 H8 N4 O2, tgt=46.06, overall=46.06 ]			(184.07133, 1397.9696)(203.05411, 11443.518)(204.05283, 5283.1836)(185.03958, 811.278)
theobromine / theophylline	359100	217295	271693	261363	3-7-DIMETHYLXANTHINE [ C7 H8 N4 O2, tgt=46.06, overall=46.06 ]			(184.07133, 1397.9696)(203.05411, 11443.518)(204.05283, 5283.1836)(185.03958, 811.278)
&alpha;-D-altrose / &beta;-D-altrose / &beta;-D-fructofuranose / &beta;-D-galactopyranose / &beta;-D-mannopyranose / &beta;-L-galactopyranose / <i>aldehydo</i>-D-glucose / <i>aldehydo</i>-D-mannose / <i>epi</i>-inositol / <i>keto</i>-D-fructose / <I>myo</I>-inositol / <i>scyllo</i>-inositol / 1D-<i>chiro</i>-inositol / hamamelose	210080	327010	268445	249407	CPD-15762 [ C6 H12 O6, tgt=47.55, overall=47.55 ]			(184.07147, 1097.8214)(166.0571, 319.94)(182.0793, 8381.378)(180.08621, 6548.8857)(203.05411, 11355.363)(204.05281, 5292.5176)(185.03943, 810.741)
&alpha;-D-galactopyranose / &alpha;-D-glucopyranose / &alpha;-D-mannopyranose / &beta;-D-glucopyranose / <i>aldehydo</i>-D-galactose / L-glucose / L-gulose	210080	210684	244858	249407	ALPHA-D-GALACTOSE [ C6 H12 O6, tgt=47.55, overall=47.55 ]			(184.0715, 1220.5233)(166.0571, 319.94)(182.0793, 8381.378)(180.08621, 6548.8857)(203.0541, 11365.807)(204.0528, 5266.007)(185.03938, 868.45337)
<i>N</i>-hydroxy-L-phenylalanine	27352.1	27147.2	28682.1	84543.2	CPD-13029 [ C9 H10 N O3, tgt=48.90, overall=48.90 ]			(184.07178, 1539.9119)(182.07971, 50912.37)(183.0826, 3199.85)(180.08635, 6346.13)(203.05437, 9727.64)(204.0526, 1084.94)(185.0405, 1086.26)
&alpha;-aminooxy-&beta;-phenylpropanoate	1	1	1	84543.2	CPD-7021 [ C9 H10 N O3, tgt=46.50, overall=46.50 ]			(184.072, 1319.69)(203.05463, 10005.625)(185.0405, 1086.26)
N-bromosuccinimide	105392	150755	122901	118601	N-BROMOSUCCINIMIDE [ C4 H4 Br N O2, tgt=32.16, overall=32.16 ]			(184.959, 5130.2803)(184.42758, 5607.1646)(184.95897, 5789.3022)(194.97421, 6560.646)(195.98047, 560.50275)(200.93669, 3447.1267)
diisopropyl fluorophosphate	14400000	8.33987e+06	9.18192e+06	6.66574e+06	DIISOPROPYL-FLUOROPHOSPHATE [ C6 H14 F O3 P, tgt=43.76, overall=43.76 ]			(184.97192, 700102.9)(186.06674, 150257.08)(167.44252, 467.11)(210.05945, 9183.903)(211.0616, 345.82)(190.82155, 2094.7773)(193.0539, 373.48)
2,4-dinitrophenol	815428	770412	592916	622011	CPD-8179 [ C6 H3 N2 O5, tgt=47.43, overall=47.43 ]			(185.01335, 1833.2351)(185.01447, 1546.5125)(201.04262, 47613.152)(202.04718, 2723.6406)(188.03659, 7688.491)
trifluoromethionine	364879	316037	251466	250494	TRIFLUOROMETHIONINE [ C5 H8 F3 N O2 S, tgt=47.38, overall=47.38 ]			(185.01427, 818.3415)(231.0138, 3379.9988)(191.01659, 824.35266)(206.0235, 1638.5701)(212.78488, 849.5231)(213.00745, 705.73)(204.05289, 4744.627)
bergaptol	1.54155e+06	1655100	882013	917528	BERGAPTOL [ C11 H6 O4, tgt=5.90, overall=5.90 ]			(185.01433, 932.8633)(188.03546, 1494.629)(220.06561, 320.41116)(202.05411, 43726.344)(203.05466, 10562.828)(204.05283, 5642.3477)
2-carboxy-1,4-naphthoquinone	818485	762607	565246	595717	CPD-18334 [ C11 H5 O4, tgt=70.26, overall=70.26 ]			(185.01437, 1548.3235)(201.04262, 47285.21)(202.04716, 2699.8308)
(<i>S</i>)-2-oxo-4-hydroxy-4-carboxy-5-ureidoimidazoline	788869	752747	564062	595460	CPD-5821 [ C5 H5 N4 O5, tgt=32.43, overall=32.43 ]			(185.01445, 1522.3114)(188.03535, 7762.975)(220.06567, 689.73987)(201.92166, 10113.492)(202.88808, 2238.5496)
L-homocysteate	1	1	1	29816.8	L-HOMOCYSTEATE [ C4 H8 N O5 S, tgt= ]			(185.0152, 1755.3867)(200.04344, 1231.9166)(186.99287, 5130.9565)
2-amino-3-carboxymuconate-6-semialdehyde	794269	777707	671453	626166	2-AMINO-3-3-OXOPROP-2-ENYL-BUT-2-ENEDI [ C7 H5 N O5, tgt=27.90, overall=27.90 ]			(185.01566, 1650.2949)(167.01115, 1772.0067)(188.0363, 7425.887)(189.04128, 496.34167)(167.01213, 1972.1635)(202.48236, 2526.8323)(203.05017, 2576.2007)(204.0529, 118.29)(187.99107, 1394.1145)
(<i>E</i>)-&omega;-(methylsulfanyl)butyl-thiohydroximate	1.03339e+06	28395.6	959727	677816	3-METHYLTHIOPROPYLHYDROXAMIC-ACID [ C5 H11 N O S2, tgt=54.21, overall=54.21 ]			(185.06366, 12449.915)(167.52054, 4031.1838)(169.84834, 265.74802)(171.04855, 347.66202)
phosphocholine	1.38993e+06	664094	705752	372558	PHOSPHORYL-CHOLINE [ C5 H13 N O4 P, tgt=75.87, overall=75.87 ]			(185.0642, 12513.801)(165.05373, 4427.258)(184.0711, 1349.8486)(165.05289, 9603.249)(166.0601, 1613.7699)(182.07967, 29900.709)(183.0824, 2377.9656)(210.05904, 17871.473)
8-(methylsulfanyl)-2-oxooctanoate	1.89683e+06	1.72947e+06	1.71649e+06	1.70863e+06	CPDQT-29 [ C9 H15 O3 S, tgt=71.91, overall=71.91 ]			(185.06439, 45382.242)(186.0659, 7167.8896)(187.06262, 5221.4854)(190.0688, 182.73)
L-methionine-D,L-sulphoximine	359819	365391	240908	217038	CPD-9035 [ C5 H12 N2 O3 S, tgt=62.29, overall=62.29 ]			(185.0647, 148655.33)(186.06628, 26982.594)(167.9257, 4087.2925)(204.05276, 5253.587)(185.03784, 675.4858)
mimosine	96546.8	110346	66241.1	20805.8	MIMOSINE [ C8 H10 N2 O4, tgt=46.69, overall=46.69 ]			(185.0651, 876630.5)(184.92313, 771790.4)
&alpha;-naphthaleneacetamide	1	56826.5	1	1	ALPHA-NAPHTHALENEACETAMIDE [ C12 H11 N O, tgt=17.31, overall=17.31 ]			(185.1128, 24561.28)(186.1151, 326.26)
3,5-dihydroxybiphenyl	3.69362e+06	2.73938e+06	3.90989e+06	3.53191e+06	CPD-8991 [ C12 H10 O2, tgt=18.40, overall=18.40 ]			(186.0669, 180905.73)(187.06389, 132177.86)(210.05826, 4314.885)(192.05411, 2523.5952)(193.0538, 348.58)
4-hydroxybenzalacetone / methylcinnamate	13775000	1.1712e+07	1.23132e+07	13612500	CPD-8636 [ C10 H10 O2, tgt=76.61, overall=76.61 ]			(187.00163, 135657.7)(188.00366, 16325.35)(188.06549, 8315.03)(168.04958, 36370.637)(169.05101, 6581.331)(172.05696, 36593.164)
3-(indol-3-yl)acrylate	2.47422e+06	2.72252e+06	3.23821e+06	2.54931e+06	CPD-11578 [ C11 H8 N O2, tgt=71.41, overall=71.41 ]			(187.06331, 103252.63)(188.06586, 9493.83)(168.8573, 17252.035)(169.65613, 5712.485)(170.65564, 4713.0024)(172.05727, 39970.01)(173.05948, 7554.987)(187.06407, 133483.48)(188.06659, 10286.89)(172.05609, 1591.25)(214.0565, 725.63)(191.03467, 450.12833)
indole-3-lactate	1.45791e+06	2.04416e+06	2201411	2.05935e+06	INDOLE_LACTATE [ C11 H10 N O3, tgt=71.56, overall=71.56 ]			(187.06348, 131306.23)(188.06583, 9249.998)(187.06403, 121761.48)(188.0666, 9766.147)(227.11334, 389.195)(214.05653, 877.31665)
coniferyl alcohol / 9-methyl ester	1.1925e+07	1.05375e+07	1.23946e+07	13637500	CONIFERYL-ALCOHOL [ C10 H12 O3, tgt=76.61, overall=76.61 ]			(187.06398, 133549.89)(188.06639, 9416.496)
oxalosuccinate	1	20393.1	95765.8	63059.2	OXALO-SUCCINATE [ C6 H3 O7, tgt= ]			(187.24219, 4488.755)(187.99107, 2413.4326)(191.01689, 1918.7306)(194.97504, 7944.9688)(195.98038, 673.45667)
L-seryl-glycine	752215	346899	64148.2	199998	CPD-12607 [ C5 H10 N2 O4, tgt= ]			(187.56436, 73312.74)(188.0654, 9687.95)(168.04897, 34893.57)(169.05046, 6598.0464)(170.0469, 4521.1914)(171.0483, 4974.0386)(172.05632, 39191.887)
(2S,4S)-4-hydroxy-2,3,4,5-tetrahydrodipicolinate	7368879	7.50321e+06	9.93001e+06	508988	CPD-14443 [ C7 H7 N O5, tgt=52.03, overall=52.03 ]			(187.93315, 5555.644)(169.03384, 2064.7273)(187.06364, 92750.17)(211.02763, 467.35797)(191.01666, 1262.8563)
psoralen	149273	68218.5	13347.8	1	PHYTOALEXIN-CMPD [ C11 H6 O3, tgt= ]			(188.03519, 7175.8843)(192.0532, 2560.4968)(187.06328, 140489.33)(211.0266, 373.3)(191.0155, 1458.36)
(<i>S</i>)-5-hydroxyisourate	1.51795e+06	1.64004e+06	1.07932e+06	1.36308e+06	5-HYDROXYISOURATE [ C5 H4 N4 O4, tgt=22.82, overall=22.82 ]			(188.0356, 305.13913)(167.01222, 502.96)(187.53804, 1009.3672)(189.04225, 235.69334)(202.05443, 45851.98)(203.05461, 10797.406)(204.05273, 5824.6074)(211.02655, 211.01001)
(<i>E</i>)-2-(1<i>H</i>-indol-3-yl)-1-thioacetohydroximate	42779.8	76636.2	1	1	CPD-1861 [ C10 H9 N2 O S, tgt=26.59, overall=26.59 ]			(188.03564, 9108.543)(191.03484, 504.8675)(188.03513, 8941.645)(211.02768, 584.166)
1,4-dihydroxy-2-naphthoate	346659	240104	248565	249914	DIHYDROXYNAPHTHOATE [ C11 H7 O4, tgt=8.63, overall=8.63 ]			(188.03566, 4045.9827)(188.0375, 4708.0576)(189.04207, 420.18152)(203.0539, 10622.6045)(204.05295, 4619.587)(211.02711, 549.23334)
3-hydroxy-2-oxo-(indol-3-yl)acetate / 4-(2-aminophenyl)-2,4-dioxobutanoate / 7-hydroxy-2-oxindole-3-acetate	109546	133142	120529	115701	DIOXINDOLE-3-ACETATE [ C10 H8 N O4, tgt=41.43, overall=41.43 ]			(188.03659, 8197.705)(189.04193, 702.99286)(192.05371, 3139.676)(193.0538, 348.58)(229.09007, 2402.4297)(211.07996, 798.45496)(211.02768, 561.43)
erythro-4-hydroxy-L-glutamate	30876.8	71775.9	99235.5	91197.6	L-ERYTHRO-4-HYDROXY-GLUTAMATE [ C5 H8 N O5, tgt=40.98, overall=40.98 ]			(188.03705, 8285.076)(189.04198, 721.5006)(145.03346, 5132.0967)(167.05399, 783.38464)
indolylmethylisothiocyanate	25185.8	102824	108758	114248	CPDQT-429 [ C10 H8 N2 S, tgt=6.63, overall=6.63 ]			(188.03706, 8306.914)(189.04193, 702.99286)(211.07996, 798.45496)(211.02795, 595.13)
4-coumaroyl-diketide	1	20801.2	34814.8	40506.8	CPD-12208 [ C11 H9 O4, tgt= ]			(188.0384, 8945.191)(189.0424, 898.30225)(192.05469, 2945.469)
<i>N</i>-hydroxytrihomomethionine	4.9507e+06	4.97191e+06	4.65762e+06	2.56259e+06	CPD-14049 [ C8 H16 N O3 S, tgt=50.30, overall=50.30 ]			(188.06949, 197059.58)(189.07213, 20096.361)(190.07457, 614.27997)(208.09311, 1211.01)
3-(1H-indol-3-yl)propanoate	5.45485e+06	5392408	5.14422e+06	3900533	INDOLE-PROPIONATE [ C11 H10 N O2, tgt=92.41, overall=92.41 ]			(188.06953, 199159.5)(189.07217, 20283.469)(190.07457, 600.46747)(170.05847, 3273.9268)(206.09976, 8769.274)
L-phenylalanine	2.88584e+06	1.30944e+06	4.01472e+06	2.28462e+06	PHE [ C9 H11 N O2, tgt=90.40, overall=90.40 ]			(188.06961, 198444.2)(189.07227, 20061.105)(190.07457, 600.46747)(170.05856, 3260.948)
kynurenate	212829	157925	117530	135271	KYNURENATE [ C10 H5 N O3, tgt=38.69, overall=38.69 ]			(188.93501, 6310.599)(191.0336, 593.93)(188.03706, 8049.0796)(189.04193, 683.9645)(175.03513, 5891.9653)
&beta;-fenchocamphorone	241266	357584	255982	389392	CPD-12225 [ C11 H18 O, tgt=77.86, overall=77.86 ]			(189.12581, 20674.043)(190.12906, 1251.8375)
2-[(2'-methylsulfanyl)ethyl]maleate	96616.8	126806	109346	105973	CPD-19476 [ C7 H8 O4 S, tgt=31.51, overall=31.51 ]			(191.01671, 1618.6813)(175.01628, 6948.143)(188.03664, 8214.919)(189.04193, 685.4812)(214.32953, 1870.815)(216.01157, 1506.9633)
swainsonine	307978	339749	208687	270090	CPD-20277 [ C8 H15 N O3, tgt=61.93, overall=61.93 ]			(191.14145, 19006.113)(192.14444, 966.97546)(173.1315, 325.2)
7-(methylsulfanyl)-2-oxoheptanoate	655930	586741	654640	601208	CPDQT-28 [ C8 H13 O3 S, tgt=64.54, overall=64.54 ]			(192.05405, 2536.5046)(193.0538, 348.58)(171.04889, 4591.356)(172.05688, 38576.008)(173.05905, 7281.1772)(174.0556, 4729.8633)
L-quinate	114580	78590.2	36379.6	78375.5	QUINATE [ C7 H11 O6, tgt=15.04, overall=15.04 ]			(192.05418, 2629.521)(174.05573, 4507.813)(200.22462, 8516.646)(201.04274, 45936.188)
(1R)-trans-chrysanthemate / geranate	18025000	1.01276e+07	1.41238e+07	8.71579e+06	CPD-13662 [ C10 H15 O2, tgt=56.64, overall=56.64 ]			(192.10014, 4334.9116)(150.10193, 411856.56)(151.10445, 30414.71)(177.10011, 1125.5983)(167.13503, 475.78333)
&alpha;-D-galacturonate / &alpha;-D-glucuronate / &beta;-D-glucuronate / <i>aldehydo</i>-D-galacturonate / <i>aldehydo</i>-D-glucuronate / 2-keto-L-gulonate / 5-dehydro-D-gluconate	114013	245224	1.02736e+06	228382	CPD-12523 [ C6 H9 O7, tgt=35.20, overall=35.20 ]			(193.03262, 6712.9917)(175.02084, 11230.748)(181.0429, 43.2)(211.0624, 228.93)(194.06535, 1810.8726)(196.5686, 630.94)(198.0743, 12.87)(219.22586, 5344.834)
DIMBOA	815798	1.06298e+06	1.17174e+06	1.05407e+06	CPD-6366 [ C9 H8 N O5, tgt=36.84, overall=36.84 ]			(193.03264, 2231.18)(214.05653, 783.2266)(215.0151, 15440.8955)(210.05905, 13120.07)(211.06163, 269.8791)
dehydroascorbate (bicyclic form) / D-isocitrate	785405	1.17021e+06	1.25101e+06	1.21909e+06	CPD-13907 [ C6 H8 O7, tgt=46.05, overall=46.05 ]			(193.03267, 3834.8245)(175.01863, 10918.597)(193.032, 2000.74)(175.10362, 10782.075)(210.22627, 12424.107)(211.06161, 265.96002)(192.054, 6226.81)(193.0537, 475.34)(215.14883, 18483.568)(220.0276, 8398.35)(199.0046, 577.26)
homoisoalliin	160838	102251	154427	20397.1	CPD-13604 [ C7 H13 N O3 S, tgt=50.06, overall=50.06 ]			(193.0539, 402.21)(174.05542, 5009.53)(200.4175, 17848.229)(201.0423, 54817.184)
N<sup>&omega;</sup>-hydroxy-L-arginine	487037	496446	335678	491060	CPD-13518 [ C6 H15 N4 O3, tgt=47.85, overall=47.85 ]			(193.12053, 2038.6035)(209.15154, 8647.864)(191.14148, 16317.316)(192.14444, 816.10626)
(<i>E</i>)-8-(methylsulfanyl)octanal oxime	85643.2	204141	272825	412549	CPDQT-350 [ C9 H19 N O S, tgt=47.37, overall=47.37 ]			(193.12053, 570.3934)(190.12924, 1398.2101)(196.09525, 1971.7529)
9,10-phenanthroquinone	299900	454198	74537	182684	CPD-9192 [ C14 H10 O2, tgt=31.95, overall=31.95 ]			(193.39487, 917.1073)(194.0654, 866.12476)(220.06566, 163.61751)
coniferyl alcohol 9-methyl ester	477695	1	438744	232685	CPD-17703 [ C11 H14 O3, tgt=60.05, overall=60.05 ]			(194.11586, 22003.31)(195.12033, 957.0263)
L-<i>N</i><sup>6</sup>-methyl-L-arginine / L-homoarginine	477120	1	438516	232209	N-METHYLARGININE [ C7 H17 N4 O2, tgt=64.28, overall=64.28 ]			(194.11586, 22003.31)(195.12033, 957.0263)
L-citrulline	1	1	1	47369.9	L-CITRULLINE [ C6 H13 N3 O3, tgt=20.54, overall=20.54 ]			(194.46855, 6559.297)(177.45802, 7066.4565)
suberate	670246	639755	151154	179760	CPD0-1264 [ C8 H12 O4, tgt=45.61, overall=45.61 ]			(195.06342, 10399.304)(177.30661, 24636.033)(178.0567, 2227.7634)
6-diazo-5-oxonorleucine	296899	410861	24856	128323	CPD0-1627 [ C6 H10 N3 O3, tgt=31.53, overall=31.53 ]			(195.06352, 11381.113)(177.7234, 9589.458)(178.0565, 1584.3867)
5-hydroxy-coniferaldehyde / 6-hydroxymellein	705983	201288	334855	139268	5-HYDROXY-CONIFERALDEHYDE [ C10 H10 O4, tgt=51.70, overall=51.70 ]			(195.0641, 5913.455)(177.05728, 28673.121)(178.057, 2014.175)(201.04187, 5684.0664)
L-canavanine	988670	193662	459816	711610	CANAVANINE [ C5 H13 N4 O3, tgt=62.74, overall=62.74 ]			(195.13669, 7960.38)(196.14, 261.47)(177.12646, 27373.607)(178.12943, 1895.9775)(182.0795, 42075.348)(183.0824, 2304.8286)
serotonin	463670	1	1	711610	SEROTONIN [ C10 H13 N2 O, tgt=72.76, overall=72.76 ]			(195.13669, 7960.38)(196.14, 261.47)(177.12646, 27373.607)(178.12943, 1895.9775)(182.07957, 55052.324)(183.08229, 3143.0635)
(<i>E</i>)-7-(methyltsulfanyl)heptanal oxime	1	1	1	29947.8	CPDQT-405 [ C8 H17 N O S, tgt=21.90, overall=21.90 ]			(195.1367, 6577.865)(177.1261, 338.51)
phlormethylbutanophenone	1	1	88563.4	112695	CPD-19784 [ C11 H14 O4, tgt=39.81, overall=39.81 ]			(196.09517, 9673.471)(228.12115, 8401.101)(218.0771, 658.0367)
phlorisovalerophenone / sinapyl alcohol	1	1	1	112695	3-METHYL-1-246-TRIHYDROXYPHENYLBUTAN [ C11H14O4, tgt= ]			(196.09566, 10376.765)(228.12166, 9301.827)(218.0775, 667.93)
9-oxononanoate	1	1	1	143928	CPD-8686 [ C9 H15 O3, tgt= ]			(196.0957, 3096.286)(178.08472, 2224.5881)
L-indospicine	6.53436e+06	6.87518e+06	1.94302e+06	5.56357e+06	CPD0-1690 [ C7 H16 N3 O2, tgt=75.22, overall=75.22 ]			(197.11598, 197897.48)(198.117, 18550.086)(199.1212, 1004.9431)(179.10509, 27464.865)(180.1082, 2678.8289)
DL -&alpha;-difluoromethyllysine	7.09616e+06	5.89141e+06	3.79586e+06	2.79755e+06	CPD-7990 [ C7 H15 F2 N2 O2, tgt=66.20, overall=66.20 ]			(197.94481, 40683.223)(198.11815, 18258.762)(198.8623, 18249.07)(199.12117, 959.1193)(180.10806, 3180.7163)(217.15274, 18437.688)(218.15363, 1611.0525)(220.10004, 931.81)(205.09505, 602.79)
methyl ecgonone	593293	251741	129449	124539	CPD-9775 [ C10 H15 N O3, tgt=2.39, overall=2.39 ]			(198.11122, 7641.287)(183.10036, 3083.1353)(198.75504, 8807.461)(199.12051, 1664.435)(220.0998, 1182.3444)(205.0957, 1374.565)
alliin	1439042	854822	1.6808e+06	1.37337e+06	CPD-9269 [ C6 H11 N O3 S, tgt=47.53, overall=47.53 ]			(199.07973, 489.79813)(177.06873, 19968.72)(201.04167, 10281.191)
harmol	514291	404603	266010	375462	CPD-9941 [ C12 H10 N2 O, tgt=49.60, overall=49.60 ]			(199.0798, 3705.1477)(200.08183, 263.04)(203.05394, 9940.739)(204.05298, 4061.3118)
2-carboxy-D-arabinitol / D-gluconate / L-idonate	40141.2	1	21751.9	35067.5	2-CARBOXY-D-ARABINITOL [ C6 H11 O7, tgt=53.16, overall=53.16 ]			(199.07983, 3265.4033)(200.0818, 197.41333)
phlorisobutanophenone	375391	352970	263818	506718	CPD-7104 [ C10 H12 O4, tgt=65.27, overall=65.27 ]			(199.0799, 9958.565)(200.0816, 366.82)(199.0806, 9618.593)(220.06569, 859.05994)(202.0497, 2141.14)
9-(methylsulfanyl)-2-oxononanoate / noraucuparin	19788.5	1	22039.9	15888.9	CPDQT-30 [ C10 H17 O3 S, tgt=61.77, overall=61.77 ]			(199.08014, 10437.649)(200.08203, 402.97665)
<i>N,N</i>-dihydroxy-L-phenylalanine / <i>N</i>-hydroxy-L-tyrosine	798490	756441	564062	614340	CPD-13030 [ C9 H10 N O4, tgt=47.66, overall=47.66 ]			(199.32965, 7086.67)(201.04259, 47148.496)(202.04713, 2700.2778)
p-chlorophenylalanine	1.59437e+06	1.1308e+06	1.11258e+06	419639	P-CHLOROPHENYLALANINE [ C9 H10 Cl N O2, tgt=47.33, overall=47.33 ]			(199.76698, 4358.707)(200.79163, 3588.8772)(187.87839, 5389.9707)(202.91699, 2726.2341)(203.04987, 1203.232)(185.03897, 566.4566)(188.04074, 265.73)(222.02681, 1014.7538)(205.41962, 1434.6268)
D,L- &gamma;-hydroxyphosphinothricin	1.77551e+06	1.72812e+06	1.39495e+06	1.49547e+06	CPD0-1245 [ C5 H11 N O5 P, tgt=67.47, overall=67.47 ]			(200.04262, 1444.7443)(201.0433, 23311.35)(202.05437, 39872.848)(183.04823, 2829.4797)(215.07413, 2298.6633)(219.02515, 90780.71)(220.02765, 5362.7773)(221.0238, 5736.898)(222.0262, 253.57)(204.35225, 298.55502)
camalexin	781604	691128	452202	602381	THIAZOL-YL-INDOLE [ C11 H8 N2 S, tgt=24.53, overall=24.53 ]			(200.04272, 1353.4142)(201.18126, 40485.56)(202.18567, 2757.216)(220.06609, 794.0791)
4-methoxy-3-indolylmethylisothiocyanate	781604	691128	452202	603729	CPDQT-433 [ C11 H10 N2 O S, tgt=24.53, overall=24.53 ]			(200.04272, 1353.4142)(220.06567, 685.5448)(201.18126, 40485.56)(202.18567, 2757.216)
<i>N</i>-hydroxyhomomethionine	820467	745242	507878	614247	CPD-14043 [ C6 H12 N O3 S, tgt=73.95, overall=73.95 ]			(200.08224, 408.44)(201.04262, 47648.676)(202.04713, 2726.1028)(188.03659, 7682.586)
5-methyl-DL-tryptophan	1	1	24716.8	1	5-METHYL-DL-TRYPTOPHAN [ C12 H14 N2 O2, tgt= ]			(200.0998, 209.27)(238.1485, 6152.48)(241.1521, 43351.05)
<i>N</i>-acetyl-serotonin	22003.5	1	77426	1	N-ACETYL-SEROTONIN [ C12 H14 N2 O2, tgt= ]			(200.0998, 209.27)(238.14868, 5238.0303)(241.15211, 37072.258)
ecgonine methyl ester	40435.5	1	364176	50504	CPD-9777 [ C10 H18 N O3, tgt=40.09, overall=40.09 ]			(200.1262, 8162.705)(201.12854, 654.125)(202.47343, 3751.7634)(203.1376, 3478.8)(206.11574, 4061.3562)
4-(1-methyl-2-pyrrolidinyl)-3-oxobutanoate methyl ester	1	1	1	24041	CPD-9773 [ C10H18NO3, tgt= ]			(200.12686, 4020.7852)(206.11635, 4635.92)
11-hydroxydodecanoate / 12-hydroxylaurate / 7-hydroxylaurate	209246	377746	159837	258805	CPD-12299 [ C12 H23 O3, tgt=47.61, overall=47.61 ]			(200.16295, 338.045)(238.14912, 7107.2217)(200.83466, 1934.2678)(203.1811, 373.97)(218.17271, 817.1318)
(+)-hydantocidin	672551	760744	617259	586450	CPDQT-5 [ C7 H10 N2 O6, tgt=47.61, overall=47.61 ]			(200.35516, 13850.42)(202.04709, 2061.965)(203.04973, 929.39197)(220.06567, 694.1764)(202.49321, 2896.0288)(203.05002, 2982.772)(243.0524, 1430.4822)(228.0485, 367.32)
2-[(2'-methylsulfanyl)butyl]maleate	188630	176885	144844	186779	CPD-19478 [ C9 H12 O4 S, tgt=61.64, overall=61.64 ]			(200.35518, 10793.53)(201.04263, 25278.008)(220.06567, 555.74054)(239.03047, 1969.4523)(221.0239, 6239.0103)(222.02708, 879.7842)
8-methoxypsoralen / bergapten	191888	179919	144844	188009	CPDQT-461 [ C12 H8 O4, tgt=50.87, overall=50.87 ]			(200.35518, 10793.548)(201.67123, 19586.85)(203.36603, 9747.371)(204.05296, 5604.381)(239.02927, 1809.95)(221.02388, 6238.5205)(222.02708, 879.1192)
Hg<SUP>2+</SUP>	1	28958.8	58479.4	11093.4	HG+2 [ Hg, tgt= ]			(200.97153, 2653.8376)(202.96977, 703.5856)
2-hydroxylamino-4,6-dinitrotoluene / 4-hydroxylamino-2,6-dinitrotoluene	1	15524.9	17898.2	1	CPD-10447 [ C7 H7 N3 O5, tgt= ]			(201.0412, 5560.255)(215.0677, 1053.675)
TRIBOA	570232	1.07016e+06	959843	1	CPD-6367 [ C8 H6 N O5, tgt=36.65, overall=36.65 ]			(201.04121, 1103.91)(178.0092, 571.75)(200.57132, 7922.8564)(201.04187, 33791.2)(202.0481, 4831.7695)(214.05655, 1601.625)(221.02325, 5820.3726)(222.02641, 2168.2537)(203.5096, 691.555)
3-keto-&beta;-D-galactose / D-glucono-1,5-lactone / L-galactono-1,4-lactone /L-gulono-1,4-lactone / L-sorbosone / L-sorbosone 1,4-lactone / L-sorbosone 2,6-lactone	780074	555251	472397	157586	CPD-1242 [ C6 H10 O6, tgt=38.28, overall=38.28 ]			(201.04231, 46952.53)(202.04698, 2841.608)(188.03596, 7312.491)
(indol-3-yl)pyruvate	2.03474e+06	2.22548e+06	1.25567e+06	1.59345e+06	INDOLE_PYRUVATE [ C11 H8 N O3, tgt=24.55, overall=24.55 ]			(202.0544, 44881.723)(203.0546, 11114.113)(204.05275, 5963.7715)(185.03922, 797.64435)(203.05359, 13274.555)(204.05264, 1736.9299)(227.54405, 168.7575)
coniferyl alcohol radical	416805	341016	182134	686700	CPD-18761 [ C10 H11 O3, tgt=71.23, overall=71.23 ]			(202.05478, 44717.57)(203.05528, 12242.523)(204.05347, 6641.005)(182.07928, 8506.465)(187.31345, 8480.598)(188.06564, 314.885)
iodoacetamide	9906.88	33120.9	41672	41592.8	IODOACETAMIDE [ C2 H4 I N O, tgt= ]			(202.9698, 589.30255)(184.95952, 5838.739)
L-selenomethionine	194187	130725	245451	155398	SELENOMETHIONINE [ C5 H11 N O2 Se, tgt= ]			(203.00208, 885.4896)(201.83804, 324.2444)(206.0234, 1541.25)(178.99403, 3955.9563)(179.99513, 484.90927)(180.99265, 342.893)(217.15617, 7122.2285)(218.03154, 6179.5503)(223.31992, 2352.2659)(224.34605, 2970.8757)(224.99197, 1228.9445)(195.98048, 201.86835)
imidazole acetol-phosphate	4.65098e+06	5.1841e+06	4.06907e+06	3.26728e+06	IMIDAZOLE-ACETOL-P [ C6 H7 N2 O5 P, tgt=63.03, overall=63.03 ]			(203.00218, 780.40204)(221.02399, 4776.9775)(221.99112, 1180.2455)(222.027, 4167.23)(204.0178, 296.2333)(218.03186, 6179.3916)(242.00339, 109588.805)(242.00404, 41489.887)(223.40332, 4115.128)(224.9902, 2870.0378)
<i>o</i>-phenanthroline	1	208566	252019	175628	O-PHENANTHROLINE [ C12 H8 N2, tgt=8.20, overall=8.20 ]			(203.0545, 10825.417)(204.0528, 5613.4707)
4-methylene diaminopimelate	466433	141077	599572	269340	CPD0-1500 [ C8 H14 N2 O4, tgt=42.12, overall=42.12 ]			(203.43526, 22475.736)(204.10524, 1341.8812)(204.1116, 205.73)(220.13109, 17875.85)(221.13423, 1224.7491)(207.1357, 8138.42)
L-cystathionine	1	27204.8	1	1	L-CYSTATHIONINE [ C7 H14 N2 O4 S, tgt=27.93, overall=27.93 ]			(204.0522, 8254.17)(228.0511, 205.46)
L-histidinol phosphate	103094	1	31085.2	15214.9	L-HISTIDINOL-P [ C6 H11 N3 O4 P, tgt= ]			(204.05292, 3707.075)(220.06595, 447.54)
cyclogutamate	492946	385371	632014	608526	CPD0-1276 [ C8 H12 N O4, tgt=42.73, overall=42.73 ]			(204.11163, 25206.852)(205.11453, 1647.6288)(195.06337, 7171.148)
D-tryptophan	338051	99651.6	632014	608876	D-TRYPTOPHAN [ C11 H12 N2 O2, tgt=65.15, overall=65.15 ]			(204.11183, 27250.777)(205.11473, 1816.9427)(231.08427, 7730.597)
<i>N</i><sup>2</sup>-hydroxy-L-tryptophan	576264	356690	105493	154055	CPD-13026 [ C11 H11 N2 O3, tgt=48.11, overall=48.11 ]			(205.07869, 273.33)(219.09782, 23318.7)(220.10007, 811.35565)
<i>N</i>-acetyl-L-glutamate	1	1	53559.1	1	ACETYL-GLU [ C7 H9 N O5, tgt=59.09, overall=59.09 ]			(205.0837, 17315.34)(206.0871, 220.41)
<i>N</i>-hydroxy-tetrahomomethionine	249724	228054	46648.6	59760.5	CPD-14051 [ C9 H18 N O3 S, tgt=31.98, overall=31.98 ]			(205.0949, 7621.6577)(203.93245, 17096.572)(204.35446, 1002.2299)
L-tryptophan	338051	915279	632014	608876	TRP [ C11 H12 N2 O2, tgt=65.15, overall=65.15 ]			(205.09499, 102260.73)(206.09808, 10175.737)(204.11183, 27250.777)(205.11473, 1816.9427)(231.08427, 7730.597)
buthionine sulfoximine	1.7924e+06	2.1478e+06	264628	1.2572e+06	BUTHIONINE-SULFOXIMINE [ C8 H18 N2 O3 S, tgt=43.61, overall=43.61 ]			(205.09563, 103238.78)(206.09892, 10557.988)(242.13612, 1198.9457)
2-amino-6-hydroxymethyl-7,7-dimethyl-7,8-dihydropteridin-4-one	2.41326e+06	2.35837e+06	2.303e+06	1.67082e+06	CPD0-1716 [ C9 H13 N5 O2, tgt=86.50, overall=86.50 ]			(205.09563, 93772.8)(206.09926, 9546.458)(242.13655, 1274.77)
N-amino DAP	1.28494e+06	807968	895582	1518314	CPD0-1498 [ C7 H14 N3 O4, tgt=44.41, overall=44.41 ]			(205.09581, 115940.9)(206.09938, 12206.414)
xanthurenate	374502	237297	220334	23567.6	XANTHURENATE [ C10 H5 N O4, tgt=11.05, overall=11.05 ]			(206.0241, 717.64)(185.014, 850.5075)(191.03413, 221.59798)(204.05263, 4636.3687)(212.80713, 946.7731)(213.00745, 705.73)
acenaphthenequinone	127729	110812	10196.8	40825.2	ACENAPHTHENEQUINONE [ C12 H6 O2, tgt=41.02, overall=41.02 ]			(206.02429, 283.59)(165.0312, 2406.8118)(166.03091, 279.37997)(185.03978, 996.09625)(183.04857, 3964.0923)(184.9084, 723864.4)(185.90886, 238488.0)(186.0663, 120182.77)
2-[(2'-methylsulfanyl)propyl]maleate	1191274	1.45997e+06	1094671	900622	CPD-19477 [ C8 H10 O4 S, tgt=41.57, overall=41.57 ]			(206.0248, 686.34)(220.06555, 330.23526)(202.05435, 46227.02)(203.05461, 11000.854)(204.05273, 5936.2974)(212.0062, 191.3)
&alpha;-difluoromethylarginine	194391	245822	1	55175.2	CPD0-1663 [ C7 H14 F2 N4 O2, tgt=38.62, overall=38.62 ]			(206.09892, 10812.763)(242.13612, 1295.752)
(E)-&alpha;-monofluoromethyldehydroarginine	1	1	234887	1	CPD0-1664 [ C7 H14 F N4 O2, tgt= ]			(206.11536, 23842.695)(207.1178, 199.0)
1-(methylsulfanyl)-8-<i>aci</i>-nitrooctane / L-tetrahomomethionine	1	1	386993	145448	CPD-12401 [ C9 H19 N O2 S, tgt= ]			(206.11577, 18207.182)(192.10014, 2704.1416)(208.1314, 255.03)
olivetolate	1.96986e+06	1.5199e+06	345234	1	CPD-7165 [ C12 H15 O4, tgt=31.78, overall=31.78 ]			(206.5881, 8782.83)(206.0871, 220.41)(206.09862, 10965.722)(242.13576, 1167.8046)
scoparone	419576	1	79508.6	1	CPD-14452 [ C11 H10 O4, tgt= ]			(207.06335, 67290.05)(208.0664, 5875.565)(192.0543, 1904.56)(208.402, 9554.261)(229.1044, 4839.34)
coniferyl acetate	1	1	53559.1	107660	CPD-9875 [ C12 H14 O4, tgt=45.07, overall=45.07 ]			(207.09001, 6756.197)(206.0871, 220.41)(208.09315, 1476.625)(243.13152, 348.63333)(222.11096, 7805.0063)
(<i>E</i>)-9-(methylsulfanyl)nonanal oxime	135304	135143	158903	163712	CPDQT-262 [ C10 H21 N O S, tgt=42.15, overall=42.15 ]			(207.13562, 481.46664)(221.17072, 10615.649)(227.12573, 4525.971)
triacsin C	1.74389e+06	1.87497e+06	1.60505e+06	1.5887e+06	CPD-14770 [ C11 H17 N3 O, tgt=83.73, overall=83.73 ]			(207.13629, 42762.453)(208.13908, 4064.107)(209.15181, 402.51105)(189.12555, 8628.06)(190.1296, 1916.2)(232.13086, 605.032)
rishitin	27977.5	283790	393055	377484	CPD-4745 [ C14H22O2, tgt= ]			(207.15515, 1623.6783)(240.19371, 14771.714)(241.1968, 1089.5583)(246.15753, 17716.43)(247.16016, 3140.292)
<i>N</i>,<i>N</i>-dihydroxy-L-dihomomethionine	33972.1	1	1	1	CPD-14048 [ C7 H14 N O4 S, tgt=32.34, overall=32.34 ]			(208.0664, 8374.949)(195.0631, 6524.1553)
plumbagin	4692851	4647838	4.43162e+06	3.39089e+06	CPD-4461 [ C11 H8 O3, tgt=92.41, overall=92.41 ]			(208.0925, 250.32)(188.06953, 196805.36)(189.07217, 20018.629)(190.07457, 600.46747)
tetraketide pyrone	1.96986e+06	1.5199e+06	291005	1	CPD-11506 [ C12 H15 O4, tgt=31.78, overall=31.78 ]			(208.0925, 250.32)(206.09862, 10965.722)(242.13576, 1167.8046)
N-hydroxy DAP	1.61281e+06	219868	618184	4.26993e+06	CPD0-1499 [ C7 H13 N2 O5, tgt=56.67, overall=56.67 ]			(208.09326, 1541.4524)(188.06972, 236403.16)(189.07234, 23647.65)(190.07457, 881.52325)(210.05907, 14171.643)(211.06161, 288.7744)
(-)-jasmonate / (+)-7-<i>epi</i>-jasmonate	1	1	38684.1	1	CPD-734 [ C12H17O3, tgt= ]			(209.115, 17685.09)(210.1175, 310.71)
(+)-jasmonate	1	45680.4	61825.5	1	CPD-5943 [ C12 H17 O3, tgt=51.76, overall=51.76 ]			(209.115, 17685.09)(210.1175, 310.71)(211.13048, 9481.127)(212.1337, 562.34)(193.12007, 956.3233)
3-hydroxy-&beta;-ionone	579966	563298	500430	547861	CPD-7200 [ C13 H20 O2, tgt=62.84, overall=62.84 ]			(209.15154, 8984.942)(191.1415, 15253.912)(192.14445, 774.4837)
3-hydroxy-9-apo-&delta;-caroten-9-one	525898	132914	500430	547861	CPD-7199 [ C13 H20 O2, tgt=62.84, overall=62.84 ]			(209.15158, 9243.394)(191.14159, 16182.768)(192.14456, 798.1125)
&alpha;-monofluoromethylarginine	46069.5	104667	390402	22691.8	CPD0-1662 [ C7 H15 F N4 O2, tgt= ]			(209.24968, 7925.2246)(207.1178, 128.39)(210.7981, 1595.8082)(231.10925, 4170.843)
petiveriin	290890	279825	198789	166913	CPD-12486 [ C10 H13 N O3 S, tgt=45.53, overall=45.53 ]			(210.05904, 13032.818)(211.06172, 288.36624)(228.08426, 939.4848)(250.0457, 5321.93)(251.0431, 2617.92)
2'-deoxyuridine / pyrimidin-2-one-ribonucleoside	133911	233639	280113	64538.9	DEOXYURIDINE [ C9 H12 N2 O5, tgt=24.50, overall=24.50 ]			(210.05907, 14979.395)(211.06163, 281.64453)(230.09932, 434.6433)
chloroacetol-phosphate	1	1	148125	1	CHLOROACETOL-PHOSPHATE [ C3 H4 Cl O5 P, tgt= ]			(210.93855, 21639.715)(212.9371, 748.975)
(<i>R</i>)-lipoate	108021	126806	104206	107426	LIPOIC-ACID [ C8 H13 O2 S2, tgt=41.86, overall=41.86 ]			(211.02768, 577.602)(191.0167, 1616.9263)(188.03621, 8262.157)(189.04173, 558.3036)(213.65163, 1904.4921)(216.0125, 1673.1064)
(<i>S</i>)-9-(2,3-dihydroxypropyl)-adenine	72767.5	197172	225019	225659	S-9-23-DIHYDROXYPROPYL-ADENI [ C8 H11 N5 O2, tgt=47.03, overall=47.03 ]			(211.0941, 270.5)(195.09851, 10310.341)(227.12549, 6011.055)(209.11543, 13169.7705)(210.1175, 310.71)
traumatin	156528	293968	1	457029	12-OXO-TRANS-10-DODECENOATE [ C12 H19 O3, tgt=33.47, overall=33.47 ]			(211.13124, 16791.322)(212.13475, 887.26)(193.11993, 2095.644)
(9Z)-12-oxo-dodec-9-enoate	178585	293968	216030	457029	12-OXO-CIS-9-DODECENOATE [ C12 H19 O3, tgt=33.47, overall=33.47 ]			(211.13124, 16791.322)(212.13475, 887.26)(193.11993, 2095.644)(217.15245, 16407.193)(231.16814, 34958.35)(232.17082, 3154.379)(235.55513, 3261.2227)(235.1408, 468.18)
2-hydroxycaffeate / 2-hydroxyferulate	527168	483498	506674	1	CPD-9803 [ C10 H10 O5, tgt=47.02, overall=47.02 ]			(211.52579, 2812.8516)(213.05817, 385.43335)(211.0615, 120.45)(228.08423, 641.6793)(215.0373, 4648.7793)
<i>iso</i>-arabidopate / arabidopate	2.49245e+06	3.3879e+06	3.73982e+06	3.60763e+06	CPD-18135 [ C9 H4 O6, tgt=65.16, overall=65.16 ]			(212.00615, 5948.2856)(230.9886, 112849.305)(231.99146, 5399.3604)(232.98737, 6844.774)
1-deoxy-D-xylulose 5-phosphate / 2-deoxy-&alpha;-D-ribose 1-phosphate	103127	206637	168645	172875	DEOXYXYLULOSE-5P [ C5 H9 O7 P, tgt= ]			(212.00616, 11139.197)(215.01491, 22214.695)(215.03636, 2352.0364)
3-oxo-dodecanoate	137293	122586	154532	273232	3-OXODODECANOATE [ C12 H21 O3, tgt=31.90, overall=31.90 ]			(213.1468, 5371.969)(195.13611, 7561.0933)(196.14, 326.84)(218.17229, 3768.83)(237.71936, 7728.2925)(241.15211, 37072.258)
(<i>E</i>)-6'-hydroxyferulate / (<i>Z</i>)-6'-hydroxyferulate / 5-hydroxyferulate	215703	204299	136613	1	CPD-15073 [ C10 H9 O5, tgt=47.62, overall=47.62 ]			(214.05675, 330.91998)(211.35962, 4166.745)(212.5592, 199.235)(228.08415, 1079.9792)(218.03113, 203.47333)
hexaketide pyrone	1	59332.9	31731.8	1	CPD-11553 [ C12 H9 O5, tgt= ]			(215.03712, 5612.973)(239.02803, 884.93335)
3-carboxy-7-(methylsulfanyl)-2-oxoheptanoate	202921	136970	255665	146739	CPD-19490 [ C9 H12 O5 S, tgt= ]			(215.03766, 8307.848)(218.03162, 9373.182)
(2,6-difluoro-4-hydroxyphenyl)pyruvate	603143	636696	677300	702960	26-DIFLUORO-4-HYDROXYPHENYLPYRUVATE [ C9 H5 F2 O4, tgt=47.62, overall=47.62 ]			(215.39105, 17871.018)(220.02747, 5432.793)(218.03174, 5060.3755)(219.13248, 37112.43)(220.02808, 2135.1614)(215.03778, 4862.3164)
dethiobiotin	1	1	1	77533.2	DETHIOBIOTIN [ C10 H17 N2 O3, tgt=26.89, overall=26.89 ]			(216.1578, 484.38)(217.1533, 2478.02)
4-(1-methyl-5-hydroxy-2-pyrrolidinyl)-3-oxobutanoate methyl ester	93456.5	122930	303612	109185	CPD-9774 [ C10 H18 N O4, tgt=56.64, overall=56.64 ]			(216.16882, 4777.7017)(219.1313, 810.48)(198.11066, 8517.388)(200.12608, 1710.0505)(236.1609, 784.73)(217.15271, 18236.465)(218.15424, 1446.9442)
acidomycin	37857.5	1	1	1	CPD-5683 [ C9 H14 N O3 S, tgt=28.01, overall=28.01 ]			(217.0694, 5656.53)(204.06369, 283.45502)
(-)-curcuhydroquinone / 15-hydroxysolavetivone / 2-dehydrolubimin	730276	344894	660453	294581	CPD-9878 [ C15 H22 O2, tgt=53.56, overall=53.56 ]			(217.15259, 32592.574)(218.15453, 2165.6003)
(<i>E</i>)-geranylacetone	730276	393259	660453	294581	CPD-12901 [ C13 H22 O, tgt=34.80, overall=34.80 ]			(217.15262, 32170.521)(218.15451, 2096.334)
dihydroartemisinate	612700	48387.6	220868	110703	CPD-7559 [ C15 H23 O2, tgt=19.62, overall=19.62 ]			(217.15262, 40606.793)(218.15485, 3079.5535)(241.15321, 25719.484)(242.156, 2064.7524)
(<i>2E,6E</i>)-farnesoate	677571	48387.6	408448	256794	CPD-12585 [ C15 H23 O2, tgt=19.62, overall=19.62 ]			(217.15277, 38775.625)(218.15504, 2807.5764)(218.1724, 9126.374)(241.15247, 25882.318)(242.1552, 2280.5017)
2-C-methyl-D-erythritol 4-phosphate	270906	80396.9	255613	1	2-C-METHYL-D-ERYTHRITOL-4-PHOSPHATE [ C5 H11 O7 P, tgt=43.04, overall=43.04 ]			(218.03136, 9190.233)(215.0374, 8323.055)
Se-methyl-Se-L-methionine	121890	106162	52247.6	1	CPD-12025 [ C6 H14 N O2 Se, tgt= ]			(218.03157, 15053.443)(219.02496, 113674.836)(220.02783, 6872.5146)(218.031, 21891.525)(215.0392, 7040.01)(231.01387, 7388.6226)
5-hydroxy-8-methoxypsoralen	202921	136970	255613	146739	CPDQT-462 [ C12 H8 O5, tgt= ]			(218.03162, 9373.182)(215.03766, 8307.848)
4-amino-2-methyl-5-(phosphooxymethyl)pyrimidine	308825	400969	177711	238886	AMINO-HYDROXYMETHYL-METHYL-PYR-P [ C6 H8 N3 O4 P, tgt=20.26, overall=20.26 ]			(218.03168, 10740.738)(219.02505, 107384.49)(220.02774, 6072.1494)
&alpha;-methyl-tyrosine	1	60842.1	184854	208104	ALPHA-METHYL-TYROSINE [ C10 H13 N O3, tgt=28.32, overall=28.32 ]			(218.0771, 646.3367)(178.08464, 9654.801)(196.0954, 12374.075)
aloesone	1	1	20743.4	45840.9	CPD-6801 [ C13 H12 O4, tgt= ]			(218.0771, 685.8667)(250.10316, 10942.324)
castanospermine	77765.8	139072	54140.2	65815.1	CPD-14609 [ C8 H16 N O4, tgt=43.82, overall=43.82 ]			(218.1152, 1338.335)(177.1103, 1082.68)(208.13905, 6356.492)(209.15175, 529.3212)
melatonin	63200.9	51312.1	140089	40405.2	N-ACETYL-5-METHOXY-TRYPTAMINE [ C13 H16 N2 O2, tgt= ]			(218.11565, 1464.9924)(220.13062, 3964.9382)(254.17139, 729.29504)(236.16156, 909.52)
6-(<i>N</i>-isopent-2-enyl-<i>N</i>-methylamino)-purine	257067	50669.8	1	1	CPD-5484 [ C12 H16 N4, tgt=39.94, overall=39.94 ]			(218.15329, 1380.854)(242.1359, 808.692)
capsidiol / lubimin / (4S)-4-(5,5-dimethylcyclohex-1-en-1-yl)cyclohex-1-ene-1-carbaldehyde / artemisinic aldehyde / germacra-1(10),4,11(13)-trien-12-al / solavetivone / zerumbone	1.05628e+06	1.13695e+06	1.27842e+06	1.38601e+06	CPD-4661 [ C15 H24 O2, tgt=33.05, overall=33.05 ]			(218.17236, 4282.6646)(241.1524, 27235.559)(242.15518, 2252.9624)
3-carboxy-6-(methylsulfanyl)-2-oxohexanoate	5.00773e+06	4.96533e+06	4.89762e+06	3.63453e+06	CPD-19491 [ C8 H10 O5 S, tgt=84.53, overall=84.53 ]			(219.02522, 72137.77)(220.02766, 4480.768)(221.02386, 4752.8726)(222.02702, 1466.434)(204.01796, 355.70667)
<i>N</i>-nitro-L-arginine	677941	555278	444908	368134	N-NITROARGININE [ C6 H13 N5 O4, tgt=70.05, overall=70.05 ]			(219.0979, 20078.248)(220.1, 704.4194)(241.1409, 1890.0359)(245.09111, 951.43085)
geranyl acetate	275920	299328	426968	1	CPD-9758 [ C12 H20 O2, tgt=11.59, overall=11.59 ]			(219.13153, 24681.338)(220.14232, 2530.3025)(203.13692, 2526.4873)
dihydropinosylvin	169558	185966	170525	166844	CPD-6963 [ C14 H14 O2, tgt=9.90, overall=9.90 ]			(219.13196, 17077.617)(237.08456, 7796.8)
L-hexahomomethionine	22302.2	39941.4	1	18036.4	CPDQT-277 [ C11 H23 N O2 S, tgt= ]			(219.13629, 1634.56)(235.39767, 5155.1875)(237.14667, 1434.5433)(237.16931, 676.65)
(R)-3-(3,4-dihydroxyphenyl)lactate / (S)-3,4-dihydroxyphenyllactate	195090	178942	122115	162491	CPD-6982 [ C9 H9 O5, tgt=42.28, overall=42.28 ]			(220.0282, 5206.4043)(221.02429, 5392.6343)(222.0278, 304.94)(183.04865, 3213.2)(202.05424, 31740.377)(215.07422, 2440.3303)(199.48009, 3099.44)
L-dopa	1.53535e+06	1.64543e+06	1.08348e+06	1.26767e+06	L-DIHYDROXY-PHENYLALANINE [ C9 H11 N O4, tgt=47.05, overall=47.05 ]			(220.0644, 178.37)(184.07129, 1180.46)(199.07903, 650.93713)(199.0798, 817.79834)(200.0817, 190.94)(203.05403, 12626.441)(204.0528, 5772.793)
7-deoxyloganetate	418482	341016	184205	881397	CPD-9980 [ C10 H13 O4, tgt=71.23, overall=71.23 ]			(220.06616, 235.75)(182.07928, 8506.465)(199.0803, 246.32)(202.05481, 45125.39)(203.05528, 12242.523)(204.05347, 6641.005)
<i>N</i>-acetyl-&beta;-glucosaminylamine	437748	67018	631490	309698	N-ACETYL-BETA-GLUCOSAMINYLAMINE [ C8 H16 N2 O5, tgt=42.12, overall=42.12 ]			(220.10637, 1329.3284)(203.81535, 18801.924)(204.1053, 1461.714)(203.10205, 25169.285)(204.10515, 1136.4299)(242.1544, 20197.576)(242.15594, 3178.205)(220.13123, 17700.041)(221.13423, 1290.79)
<i>N<sup>2</sup></i>-acetyl-L-Lysine	1.08024e+06	1.01943e+06	1.49723e+06	1.20923e+06	N-ACETYL-L-LYSINE [ C9 H18 N2 O3, tgt=68.21, overall=68.21 ]			(220.16783, 57320.71)(221.17064, 6915.25)(227.1255, 4952.4404)
3-oxalomalate	263848	200219	144664	176573	CPD-628 [ C6 H3 O8, tgt=8.35, overall=8.35 ]			(221.02309, 7182.3164)(222.0263, 518.0333)(203.00221, 777.8632)(230.9887, 30215.998)
dinitrophenylhydrazine	164205	163140	101265	106351	DINITROPHENYLHYDRAZINE [ C6 H6 N4 O4, tgt=50.00, overall=50.00 ]			(221.02379, 7450.1934)(222.02701, 934.9116)(185.0393, 857.28)(200.7015, 19967.555)(202.57785, 28437.51)(203.57706, 9460.355)(204.05331, 5982.3335)(204.90921, 1794.4423)
menaquinone-1	60570.5	65110.5	163581	80964.9	CPD0-1367 [ C16 H16 O2, tgt= ]			(222.11, 9623.079)(244.6368, 505.90396)(246.14261, 838.124)(260.15787, 1267.6793)
4-methyl-5-(2-phosphooxyethyl)thiazole	192150	200576	145701	179269	THZ-P [ C6 H8 N O4 P S, tgt=41.11, overall=41.11 ]			(223.33037, 3371.4985)(224.33229, 7899.751)(224.99069, 3537.701)(225.98685, 2531.365)(239.02882, 1743.4061)
4-(indol-3-yl)butanoate	754462	161357	552281	1	CPD-10507 [ C12 H12 N O2, tgt=62.59, overall=62.59 ]			(225.07346, 27954.52)(226.07635, 1654.725)(205.09477, 5824.1504)(207.0634, 78199.78)(208.0664, 7052.59)(204.11136, 23795.95)(205.11426, 1828.73)
(-)-methyl jasmonate / 5,6-epoxy-3-hydroxy-9-apo-&beta;-caroten-9-one / grasshopper ketone	1.46319e+06	1.53813e+06	1.31832e+06	1.31331e+06	CPD1F-2 [ C13 H20 O3, tgt=68.16, overall=68.16 ]			(225.14624, 3621.8352)(207.13632, 44914.37)(208.1391, 4173.709)(209.15181, 412.86304)(245.24644, 5295.861)(246.18962, 507.02124)(250.14105, 1020.49)(231.12035, 1494.9877)(232.13013, 954.6433)
isopentenyl diphosphate / prenyl diphosphate	1.14985e+06	1.00922e+06	1.13349e+06	974206	DELTA3-ISOPENTENYL-PP [ C5 H9 O7 P2, tgt=29.71, overall=29.71 ]			(225.9853, 4208.1553)(265.02063, 9077.724)(266.03107, 411.47998)(243.00171, 72563.3)(244.00227, 11356.237)(244.99939, 4212.298)(251.97026, 935.6446)(252.96985, 409.42)
amobarbital	65846.2	34871.2	58451.5	1	CPD-5742 [ C11 H17 N2 O3, tgt=42.83, overall=42.83 ]			(227.1252, 710.96)(209.11284, 2407.5767)(211.13077, 852.19495)(212.13658, 2809.7766)(225.1462, 6354.7397)(233.11415, 4234.5703)
2,3',4,6-tetrahydroxybenzophenone	1	21989.2	1	1	2346-TETRAHYDROXYBENZOPHENONE [ C13 H10 O5, tgt=46.86, overall=46.86 ]			(228.0485, 428.54)(271.0483, 2508.6)(252.0309, 438.8)
5-fluoropyrimidin-2-one-ribonucleoside	1	21564.5	1	1	CPD0-1311 [ C9 H11 F N2 O5, tgt=26.17, overall=26.17 ]			(228.0498, 436.85)(251.04129, 6651.3447)
4,5-<i>seco</i>-dopa	42268.5	63090	1	1	CPD-253 [ C9 H10 N O6, tgt=37.86, overall=37.86 ]			(228.0498, 436.85)(251.04204, 6838.9897)(237.03503, 17442.604)(238.03638, 2626.1558)
3-carboxy-8-(methylsulfanyl)-2-oxooctanoate	42268.5	32676.9	1	1	CPD-19489 [ C10 H14 O5 S, tgt=8.78, overall=8.78 ]			(228.0498, 436.85)(271.0479, 2876.4773)(251.18275, 5932.692)
3-chlorodiaminopimelate	685167	610669	443886	555790	CPD0-1502 [ C7 H13 Cl N2 O4, tgt=67.90, overall=67.90 ]			(228.0511, 356.13)(229.08966, 2183.6401)(249.0431, 36645.38)(250.04507, 4987.1855)(251.04225, 3901.7795)
D-octopine	439801	329292	785167	458652	CPD-309 [ C9 H18 N4 O4, tgt=75.76, overall=75.76 ]			(228.12132, 3241.6003)(269.1216, 619.18)(234.14656, 2211.4119)(264.16705, 3669.483)(250.14143, 11291.943)(252.15665, 357.085)(251.111, 15779.29)(246.15785, 14922.766)(247.16039, 1341.789)
cytidine	56627.1	93691.8	110888	104027	CYTIDINE [ C9 H13 N3 O5, tgt=51.04, overall=51.04 ]			(229.08984, 2473.7256)(229.0909, 2433.7483)(243.10568, 7842.989)(244.10666, 800.00134)
thymidine	77523	23431.8	61313.5	74215.1	THYMIDINE [ C10 H14 N2 O5, tgt=40.90, overall=40.90 ]			(229.09058, 2635.2302)(243.91872, 2066.0117)
3-methoxy-4',5-dihydroxy-<i>trans</i>-stilbene	57504.5	36380.5	99015.5	80466.2	CPD-12871 [ C15 H14 O3, tgt=45.18, overall=45.18 ]			(229.09116, 2109.316)(243.10587, 8140.91)(244.10661, 774.4863)
scoparone	419576	1	67255.9	1	CPD-9836 [ C11 H10 O4, tgt= ]			(229.1044, 4839.34)(207.0629, 13899.865)
carbidopa	91667.6	1	188852	1	CPD-11550 [ C10 H14 N2 O4, tgt=37.58, overall=37.58 ]			(229.10446, 3115.5022)
phenylethylbenzoate / pinosylvin monomethylether	92199.1	137929	184089	104426	CPD-12217 [ C15 H14 O2, tgt=31.55, overall=31.55 ]			(229.63484, 2221.9824)(231.1206, 843.11993)(231.08405, 9204.167)
desoxyhemigossypol	26578	1	61866.2	1	CPD-9524 [ C15 H16 O3, tgt= ]			(230.11499, 1555.0199)(264.65173, 3761.9482)
<i>N</i><sup>1</sup>-acetylspermine	113340	1	112236	124544	N1-ACETYLSPERMINE [ C12 H31 N4 O, tgt=23.27, overall=23.27 ]			(230.24565, 14419.757)(231.2488, 355.40332)
2-amino-3-(phosphomethylphosphinyl)propanoate	12540.8	276139	27731.2	249986	CPD0-1650 [ C4 H9 N O7 P2, tgt= ]			(230.98882, 118753.195)(231.99165, 5995.78)(232.98785, 7419.7075)(263.01398, 5887.7)(245.00368, 4211.162)(252.96921, 949.70496)
&alpha;-D-ribose 5-phosphate / &alpha;-D-ribose-1-phosphate / &alpha;-D-xylose 1-phosphate / &beta;-D-ribose 5-phosphate / &beta;-L-arabinose 1-phosphate / <i>aldehydo</i>-D-arabinose 5-phosphate / <i>aldehydo</i>-D-ribose 5-phosphate / D-arabinofuranose 5-phosphate / D-ribulose 1-phosphate / D-ribulose 5-phosphate / D-xylulose 5-phosphate	124244	190778	222109	206729	CPD-15318 [ C5 H9 O8 P, tgt=23.55, overall=23.55 ]			(231.01357, 688.952)(212.00616, 7569.5723)(215.01465, 15625.509)(249.0411, 5676.823)(250.0448, 434.181)(232.98737, 9010.83)
2-carboxy-L-<i>threo</i>-pentonate / D-glucarate	58840.2	47945.9	1	1	CPD-13912 [ C6 H8 O8, tgt= ]			(231.0139, 5486.5376)(191.01587, 701.9267)(211.0273, 250.25667)(214.50885, 634.475)
metyrapone	54655.2	160762	173328	98248.9	CPD-7023 [ C14 H14 N2 O, tgt=29.49, overall=29.49 ]			(231.1203, 921.54)(245.47809, 981.99)(248.16216, 2802.4453)(231.08424, 8957.6455)
2,4,6-trinitrotoluene	15694.5	153106	173227	164690	CPD-9138 [ C7 H5 N3 O6, tgt= ]			(231.99152, 7754.6343)(232.98743, 9784.688)
1,2-dibutyrin	63200.9	79492.2	162838	75371.9	CPD-13040 [ C11 H20 O5, tgt= ]			(232.13013, 1520.5898)(254.17253, 1205.014)(236.16177, 914.4037)(255.11993, 11853.1045)
shikimate 3-phosphate	124244	190778	222109	206729	SHIKIMATE-5P [ C7 H8 O8 P, tgt=23.32, overall=23.32 ]			(232.98737, 9010.83)(273.0428, 12866.489)(274.04526, 306.35498)
<i>trans</i>-abscisic alcohol	64987	76952.4	78041.6	131270	CPD4FS-8 [ C15 H22 O3, tgt= ]			(233.15092, 11886.013)(236.16167, 2174.4333)(251.16174, 1626.0369)(233.15176, 8418.645)
(-)-heliannuol A / (+)-heliannuol D / <i>cis</i>-abscisic alcohol / 2-<i>cis</i>,4-<i>trans</i>-xanthoxin	26763.6	1	55921.1	131270	CPD-9876 [ C15 H22 O3, tgt= ]			(233.15092, 11886.013)(236.16167, 2174.4333)(251.16196, 1631.802)(233.1519, 8189.6494)
germacra-1(10),4,11(13)-trien-12-oate	31320.2	15236.5	82943.6	1	CPD-9413 [ C15H21O2, tgt= ]			(233.151, 10659.344)(236.1617, 2583.142)
artemisinate / zealexin A1	31320.2	1	82943.6	1	CPD-13248 [ C15H21O2, tgt= ]			(233.15112, 11320.957)(236.16185, 2877.8677)
harmine	33296.9	20954.1	26163.9	1	CPD-9940 [ C13 H12 N2 O, tgt=10.86, overall=10.86 ]			(235.1405, 511.91)(237.08435, 185.015)(217.06993, 7984.6797)
ubiquinone-1	1539827	1.22695e+06	3.71438e+06	2.6024e+06	CPD0-1118 [ C14 H18 O4, tgt=38.44, overall=38.44 ]			(235.72244, 625.012)(237.1281, 95.74)(253.1402, 183.22)(268.1517, 31376.963)(269.15466, 3664.1313)(250.1411, 13146.473)(251.14447, 3121.8352)(259.11243, 1181.6036)
<i>N</i>-hydroxypentahomomethionine	72393.5	42179.9	154465	1	CPD-14039 [ C10 H20 N O3 S, tgt=9.48, overall=9.48 ]			(236.1254, 2047.7999)(217.11719, 8719.489)(236.22037, 5829.851)
zealexin B1	663041	479181	1.013e+06	1	CPD-13572 [ C15 H19 O2, tgt=23.41, overall=23.41 ]			(236.1609, 716.49)(231.16803, 39488.027)(232.17076, 3172.2468)(237.12273, 506.54)
(+)-costunolide (12,6&alpha;)	1	1	20805.6	1	CPD-9410 [ C15 H20 O2, tgt= ]			(236.1609, 749.06)(217.1523, 4610.3)(218.1541, 241.15)(232.1707, 6474.39)(237.1252, 985.87)
7,8-dihydromonapterin	1	1	1	166844	CPD-11770 [ C9H13N5O4, tgt= ]			(237.08534, 7601.2085)(259.11313, 1531.1425)
7,8-dihydroneopterin	1	53450.1	1	166844	DIHYDRO-NEO-PTERIN [ C9H13N5O4, tgt= ]			(237.08536, 7914.163)(259.11316, 1670.4662)
<i>cis</i>-zeatin	20734.1	1	104124	1	CPD-4441 [ C10H13N5O, tgt= ]			(237.1458, 4118.062)(219.13527, 2632.1716)
<i>(S)</i>-tetrahydroprotoberberine	56890.8	133393	94827	90651.6	S-781314-TETRAHYDROPROTOBERBERINE [ C17 H18 N, tgt=46.68, overall=46.68 ]			(237.14616, 8624.773)(257.1873, 1242.0659)
<i>N</i>, <i>N</i>-dihydroxy-tetrahomomethionine	2.72502e+06	2.1783e+06	1.15237e+06	6.00349e+06	CPD-14052 [ C9 H18 N O4 S, tgt=44.68, overall=44.68 ]			(238.10483, 592.5875)(219.09805, 6898.667)(220.10016, 382.535)(257.12585, 1476.9105)(239.12552, 208.85558)(259.13763, 12228.939)(260.0964, 1012.43)(241.06825, 5082.8574)
harmaline	218163	127482	270552	196146	CPD-9939 [ C13 H14 N2 O, tgt=31.11, overall=31.11 ]			(238.10486, 4274.6025)(198.1108, 2928.6462)(234.14658, 2438.8208)(219.09253, 893.1818)(219.14636, 605.09)
D-erythro-imidazole-glycerol-phosphate	4.64295e+06	4785958	5.21877e+06	4.71795e+06	D-ERYTHRO-IMIDAZOLE-GLYCEROL-P [ C6 H9 N2 O6 P, tgt=63.03, overall=63.03 ]			(239.02739, 1318.29)(238.11465, 2515.1353)(238.91946, 1619.5621)(239.0262, 1298.55)(220.96143, 4680.156)(221.9623, 1184.1135)(222.02686, 4133.95)(261.44727, 1730.2308)(241.50331, 128248.99)(242.00415, 41753.527)
4-methyl-umbelliferyl phosphate	181151	185820	130661	137420	4-METHYL-UMBELLIFERYL-PHOSPHATE [ C10 H7 O6 P, tgt=43.62, overall=43.62 ]			(241.00342, 251925.66)(242.00424, 72074.914)(259.01028, 1100.4425)(258.97937, 11769.445)(254.02197, 415.495)
1-deoxy-2,3-hexodiulose-6-phosphate	3.45101e+06	3.09575e+06	3.39259e+06	3196374	CPD-20125 [ C6 H9 O8 P, tgt=27.06, overall=27.06 ]			(241.00342, 254014.95)(242.00424, 72675.89)
1,3-dihydroxy-N-methylacridone	615871	531729	646250	395582	13-DIHYDROXY-N-METHYLACRIDONE [ C14 H11 N O3, tgt=4.04, overall=4.04 ]			(241.0681, 14661.305)(223.05763, 2957.8088)
<i>N</i>-benzoylanthranilate	615871	595934	648351	616088	CPD-423 [ C14 H10 N O3, tgt=46.34, overall=46.34 ]			(241.0682, 14616.484)(223.05772, 2915.163)
cerulenin	874481	1.06942e+06	1.1267e+06	1070803	CPD-6901 [ C12 H17 N O3, tgt=58.82, overall=58.82 ]			(241.1524, 31335.348)(242.15518, 2680.184)(230.09932, 355.68002)
phenylarsine oxide	1.2871e+06	1.1208e+06	1.22567e+06	1.17585e+06	CPD-7058 [ C9 H12 As O3, tgt=67.01, overall=67.01 ]			(243.00171, 72536.14)(244.00227, 11350.924)(244.99939, 4210.429)(224.99062, 5233.087)
biotin / hemigossypol	57504.5	11929	99015.5	55404.4	BIOTIN [ C10 H15 N2 O3 S, tgt=62.26, overall=62.26 ]			(243.10568, 8333.188)(244.10661, 774.4863)
<i>N</i>-(2-methoxy-4-pyridyl)-<i>N'</i>-phenylurea	63904.6	12568.8	108605	59598	CPD-5482 [ C13 H13 N3 O2, tgt=38.72, overall=38.72 ]			(243.10568, 8372.865)(244.10661, 776.3282)
<i>o</i>-topolin	65275.6	24454.2	102196	58243.6	CPD-6161 [ C12 H13 N5 O, tgt=61.50, overall=61.50 ]			(243.55241, 7492.0234)(244.1066, 705.2329)(266.15735, 606.598)(268.10236, 1073672.8)(269.1047, 114498.875)(270.10565, 11969.365)
<i>m</i>-topolin	138961	54793.6	102196	58243.6	M-TOPOLIN [ C12 H13 N5 O, tgt=61.50, overall=61.50 ]			(243.74043, 7228.309)(244.1066, 705.2329)(264.27637, 4766.665)(262.1479, 2397.935)(243.1307, 7077.58)(268.10236, 1073672.8)(269.1047, 114498.875)(270.10565, 11969.365)
&alpha;-oxo-1-carboxy-5,6-dihydrothiopyranpropanoate S-oxide	268922	214691	239950	234448	CPD0-1525 [ C9 H8 O6 S, tgt=30.11, overall=30.11 ]			(244.00229, 11654.793)(244.9994, 4322.0786)(225.98672, 4458.172)
5-(methylsulfanyl)-2,3-dioxopentyl 1-phosphate	3.19831e+06	2.52305e+06	2.61243e+06	2.94614e+06	CPD-8999 [ C6 H9 O6 P S, tgt=42.09, overall=42.09 ]			(244.96617, 4332.267)(244.9988, 3248.05)(223.64339, 10791.404)(225.9858, 4326.6904)(241.91042, 87155.98)(243.53255, 28134.09)(243.40298, 43600.684)(244.00328, 10351.963)(246.9673, 385.39)
5-methyluridine	2.02297e+06	3741689	3.30805e+06	5.24606e+06	CPD-15123 [ C10 H14 N2 O6, tgt=65.86, overall=65.86 ]			(245.09082, 169.94249)(259.09186, 19153.162)(260.09647, 1291.0319)(280.13593, 42.1575)(259.0931, 18040.354)(260.0965, 833.70166)(258.11398, 74.378006)
2-[(2'-methylsulfanyl)heptyl]maleate	2.12519e+06	3.86011e+06	3.8017e+06	4.08087e+06	CPD-19481 [ C12 H18 O4 S, tgt=47.08, overall=47.08 ]			(245.09138, 177.614)(280.13593, 50.555)(259.09332, 18135.785)(260.0958, 766.4675)
&alpha;-eudesmol / &beta;-eudesmol / (-)-&alpha;-bisabolol / (-)-patchoulol / (<i>2E,6E</i>)-farnesol / (3<i>R</i>,6<i>E</i>)-nerolidol / (3<i>S</i>,6<i>E</i>)-nerolidol / 10-<i>epi</i>-&gamma;-eudesmol / 2-<i>cis</i>,6-<i>cis</i>-farnesol / 2-<i>cis</i>,6-<i>trans</i>-farnesol / intermedeol / longiborneol	91511.4	139574	96829.1	123657	CPD-11430 [ C15 H26 O, tgt=45.42, overall=45.42 ]			(245.1835, 8201.156)(246.18755, 1145.775)(224.2097, 11360.9375)(232.1884, 1705.0264)
L-leucyl-L-leucine	78720.9	140022	64488.2	123657	L-LEUCYL-L-LEUCINE [ C12 H24 N2 O3, tgt=47.54, overall=47.54 ]			(245.1835, 8452.26)(246.18755, 1145.775)(245.18414, 5999.995)(232.18843, 1807.2618)(254.1734, 757.295)
geranylhydroquinone	1773862	97723.8	672770	147170	CPD-9319 [ C16 H22 O2, tgt=39.03, overall=39.03 ]			(246.1575, 28917.072)(247.16008, 3024.7158)(229.15265, 5756.75)(230.66145, 1309.1649)(231.16763, 8479.79)(269.1558, 11805.811)(251.13873, 54589.516)(252.14, 7717.502)(253.14066, 179.68)
2-(2-carboxy-4-methylthiazol-5-yl)ethyl phosphate / 2-[(2<i>R</i>,5<i>Z</i>)-2-carboxy-4-methylthiazol-5(2<i>H</i>)-ylidene]ethyl phosphate	524553	843254	211624	1.39993e+06	CPD-13576 [ C7 H7 N O6 P S, tgt=22.58, overall=22.58 ]			(246.9673, 385.39)(251.97063, 817.0433)(282.01035, 3839.5044)(270.0438, 20685.975)(270.38556, 2209.7651)(270.9433, 6820.35)
norbelladine	1	1	59989.6	1	CPD-19420 [ C15 H17 N O3, tgt= ]			(247.12505, 1009.27496)(282.11633, 2644.6619)(264.10464, 4589.8438)
3,3'-di(indol-3-yl)methane / ellipticine	2.44424e+06	2300353	2.60032e+06	2.49207e+06	CPDQT-424 [ C17 H14 N2, tgt=65.23, overall=65.23 ]			(247.1251, 1061.5637)(247.12622, 9930.09)(248.1294, 1328.63)(269.10477, 107076.8)(270.10587, 10612.437)
<i>N</i>,<i>N</i>-dihydroxyhexahomomethioniate	2.44424e+06	1.78848e+06	1.93376e+06	2.49207e+06	CPD-14037 [ C11 H22 N O4 S, tgt=67.50, overall=67.50 ]			(247.12527, 1216.0745)(247.1261, 11799.572)(248.1294, 1328.63)(286.1704, 521.28)(269.10486, 106680.87)(270.106, 10544.728)
lacinilene C	739065	45779.5	480175	1	CPD-9754 [ C15 H18 O3, tgt=56.30, overall=56.30 ]			(247.87975, 11221.612)(248.1294, 1328.63)(228.1206, 2686.7)(250.1404, 4247.54)(264.1666, 1721.165)(252.1061, 246.48)
2,7-dihydroxycadalene	1	1	1	83794.9	CPD-9752 [ C15 H18 O2, tgt=61.80, overall=61.80 ]			(248.16306, 17510.906)(249.16595, 1256.31)
juvenile hormone III	366962	81490.4	578186	1	CPD-8838 [ C16 H26 O3, tgt=39.09, overall=39.09 ]			(248.17319, 24651.615)(249.1761, 2129.7852)
<i>N</i>-(2-chloro-4-pyridyl)-<i>N'</i>-phenylurea	314494	370247	335422	81795.8	CPD-5481 [ C12 H10 Cl N3 O, tgt=25.94, overall=25.94 ]			(249.04166, 20521.418)(250.04446, 1807.233)(249.05896, 921.77)(231.04855, 9580.756)(272.74335, 7064.824)(273.37686, 3135.1133)(252.0308, 351.04)
5-fluoro-5-deoxy-D-ribulose 1-phosphate	73099.8	73619.9	1	1	CPD-12707 [ C5 H8 F O7 P, tgt= ]			(249.04176, 25523.012)(250.16898, 1398.4163)(251.04126, 577.71497)
uridine	512871	422415	484592	561867	URIDINE [ C9 H12 N2 O6, tgt=28.15, overall=28.15 ]			(249.0427, 29047.283)(250.04494, 3346.9385)(251.04231, 3471.0386)
&gamma;-L-glutamyl-L-cysteine	51824.9	114797	51156.6	42368.9	L-GAMMA-GLUTAMYLCYSTEINE [ C8 H13 N2 O5 S, tgt=19.08, overall=19.08 ]			(249.05743, 3224.73)(231.0472, 4534.5537)(255.0677, 5869.41)(273.04385, 10706.93)(274.04544, 387.08334)
<i>N</i>-benzoyl-L-glutamate	132311	31878.2	180206	92904	CPD-11846 [ C12 H11 N O5, tgt=5.41, overall=5.41 ]			(249.05823, 2432.713)(231.04779, 7497.9424)(252.09195, 1464.573)
4-deoxypyridoxine 5'-phosphate / L-arogenate	117692	40232.8	180206	100680	CPD0-1221 [ C8H10NO5P, tgt= ]			(249.05823, 899.64905)(231.04788, 9824.025)
<i>trans</i>-tuberonic acid	12478.8	1	39390.1	1	CPD-11253 [ C12 H17 O4, tgt= ]			(250.10254, 603.95)(209.11285, 2268.555)(228.1213, 437.53)(246.15753, 38422.332)(247.1601, 4587.28)(227.1261, 1021.8)
aucuparin / demethylsuberosin	1	1	82254.1	1	CPD-14666 [ C14 H14 O3, tgt= ]			(250.1408, 4767.173)(230.11499, 8420.782)
(-)-heliannuol E / (+)-<i>cis</i>-abscisic aldehyde / (+)-heliannuol K / 2,2,6,9-tetramethyl-3,6-dihydro-2H-1-benzoxocine-3,8-diol / 3&beta;-hydroxycostunolide / parthenolide	25387.9	96734.8	136396	41038.2	CPD-9887 [ C15 H20 O3, tgt=29.44, overall=29.44 ]			(250.1416, 3927.1875)(266.17163, 2209.6765)(248.16196, 7978.293)(249.1645, 228.53)
heliannuol C	25387.9	96734.8	136396	154543	CPD-9880 [ C15 H20 O3, tgt=29.44, overall=29.44 ]			(250.1417, 3465.934)(266.17184, 2099.8372)(248.16219, 9324.141)(249.16547, 850.0767)
<i>N</i>,<i>N</i>-dihydroxypentahomomethionine	159996	267700	737509	42808.8	CPD-14040 [ C10 H20 N O4 S, tgt=46.73, overall=46.73 ]			(251.11125, 10669.326)(255.11974, 3684.9492)(254.1182, 270.17)(234.36192, 1619.6025)(268.1506, 1282.79)(250.64117, 9139.865)(277.10403, 4253.0317)(259.09378, 20226.42)(260.09805, 5164.99)
4-bromoisophthalate	194272	185100	166121	163396	CPD0-1269 [ C8 H9 Br O4, tgt=47.54, overall=47.54 ]			(251.96991, 809.3056)(252.96976, 417.97)(251.9708, 1023.0227)(256.9814, 72121.81)(271.01227, 2066.3188)(272.01297, 448.7333)(272.95453, 11349.115)(273.9547, 858.665)(274.9525, 790.48)(276.9713, 394.06)(259.9621, 391.67)
zoledronate	1	41028.8	73017.9	28545.9	ZOLEDRONATE [ C5 H8 N2 O7 P2, tgt= ]			(251.97021, 1192.832)(252.96992, 443.53333)(274.00046, 687.1886)(256.9804, 86708.58)(257.98175, 14336.369)(289.01086, 585.8875)(271.01218, 1612.6271)(273.00357, 1093.3934)(292.97324, 5346.5913)(293.9741, 1156.8008)(274.9526, 856.35)
pamidronate	1.29694e+06	1.33936e+06	917900	984562	PAMIDRONATE [ C3 H10 N O7 P2, tgt=37.91, overall=37.91 ]			(252.0309, 376.12)(239.02907, 2670.2878)(256.9804, 84392.4)(257.9816, 13734.905)(258.97937, 11871.557)
<i>N</i>-hydroxyhexahomomethioniate	144295	156999	207649	77688.1	CPD-14036 [ C11 H22 N O3 S, tgt=2.22, overall=2.22 ]			(252.87325, 3028.133)(230.61523, 9200.401)(251.14139, 4176.0835)(253.1403, 2036.51)(232.13142, 1094.342)(266.16364, 6762.717)(248.16168, 9819.524)(249.1645, 342.8)
alendronate	473221	576431	306434	275374	ALENDRONATE [ C4 H12 N O7 P2, tgt=24.52, overall=24.52 ]			(253.0142, 435.80408)(253.0256, 205.425)(231.0124, 3603.49)(271.04755, 586.31244)(249.97063, 15326.847)(250.90848, 1761.9852)(251.04175, 962.76)(273.00266, 439.56277)(273.9996, 316.55753)
(<i>E</i>)-&omega;-(methylsulfanyl)nonyl-thiohydroximate	28099.8	33774.2	1	1	CPDQT-415 [ C10 H21 N O S2, tgt=46.82, overall=46.82 ]			(253.14091, 6669.354)(259.09412, 28249.3)(260.0973, 1579.4401)
pyrimethamine	1	1	22791.4	1	CPD0-1583 [ C12 H14 Cl N4, tgt= ]			(254.0993, 483.52)(250.1021, 7436.34)
3-hydroxylubimin	1	1	267209	185728	CPD-4744 [ C15 H24 O3, tgt= ]			(254.17177, 1076.0337)(270.2143, 10447.292)(260.1579, 789.23126)
hypoglycin B	128814	1.02248e+06	1	2.49561e+06	CPD-9700 [ C12 H17 N2 O5, tgt=37.10, overall=37.10 ]			(255.11952, 3719.4475)(269.10568, 112702.5)(270.1068, 10906.259)
<i>N</i>-methylnorbelladine	135874	196178	87241.2	137501	CPD-19422 [ C16 H19 N O3, tgt=47.57, overall=47.57 ]			(255.12012, 10798.088)(276.1558, 904.92)(257.1363, 396.41)(291.17062, 1072.0168)(278.1714, 1163.605)
(-)-8-demethylmaritidine / (10b<i>R</i>,4a<i>S</i>)-oxomaritinamine / (10b<i>S</i>, 4a<i>R</i>)-normaritidine / (10b<i>S</i>,4a<i>R</i>)-oxomaritinamine / (1S,15R,16S)-4-methoxy-9-azatetracyclo[7.6.1.0<sup>2</sup>,<sup>7</sup>.0<sup>12</sup>,<sup>16</sup>]hexadeca-2,4,6,12-tetraene-5,15-diol / <i>N</i>-demethylgalanthamine / 4'-<i>O</i>-methylnorbelladine	135874	196178	59785.6	137501	CPD-19446 [ C16 H19 N O3, tgt=47.57, overall=47.57 ]			(255.12013, 10882.621)(257.1363, 396.41)(291.1707, 1013.2107)(278.1714, 872.22)
(<i>R</i>)-norcoclaurine / (S)-norcoclaurine	257965	105615	35744.1	213366	R-NORCOCLAURINE [ C16 H18 N O3, tgt=28.20, overall=28.20 ]			(256.01575, 13805.2)(291.17038, 499.98398)(276.15765, 517.13995)(295.1256, 25919.523)(296.1289, 4484.0303)(277.10495, 8374.21)
palmitate	79759.4	64577.2	88432.5	119662	PALMITATE [ C16 H31 O2, tgt=13.39, overall=13.39 ]			(256.26108, 9887.354)(257.2636, 656.87)(278.21652, 7481.7847)(279.22806, 291.14667)(260.67038, 4661.139)(262.22177, 319.19333)
(indol-3-yl)acetyl-L-valine	806467	638185	881402	1	CPD-9577 [ C15 H17 N2 O3, tgt=35.24, overall=35.24 ]			(257.1252, 3500.6313)
(-)-medicarpin / 2'-<i>O</i>-methylisoliquiritigenin / echinatin / pinostrobin	83817.2	29217.6	255515	57209.4	CPD-3402 [ C16 H14 O4, tgt=1.20, overall=1.20 ]			(258.1069, 611.6675)(270.10565, 13152.142)(277.0661, 285.395)
(-)-vestitol / deoxyshikonin	11337500	10962500	11775000	11287500	CPD-9366 [ C16 H16 O4, tgt=41.63, overall=41.63 ]			(258.1138, 428.63718)(295.10016, 270285.94)(296.10263, 26044.66)(297.10397, 3390.5876)(277.09024, 134.64125)
hemigossypol-6-methyl ether	1	1	307112	1	CPD-9529 [ C16H18O4, tgt= ]			(258.1138, 458.17426)(297.10352, 3737.6724)
<i>N</i><sup>4</sup>-aminocytidine / 5-methylcytidine	1	1	144816	106176	CPD0-2496 [ C10H15N3O5, tgt= ]			(258.1138, 866.93396)(257.12616, 9480.695)(284.09564, 10708.361)
<i>sn</i>-glycero-3-phosphocholine	1	1	167210	106176	L-1-GLYCERO-PHOSPHORYLCHOLINE [ C8H20NO6P, tgt= ]			(258.11386, 767.76495)(257.1261, 9329.72)(284.09564, 10708.361)
15-hydroxypentadecanoate	1	40619.4	1	1	CPD-11594 [ C15 H29 O3, tgt= ]			(258.218, 7819.085)(280.25928, 648.025)
1,16-hexadecane-diol / palmitaldehyde	295395	185113	272854	165584	CPD-17642 [ C16 H34 O2, tgt=33.60, overall=33.60 ]			(258.2762, 12641.018)(259.27933, 366.06378)
norcraugsodine	47919.9	1	75846.6	1	CPD-19419 [ C15 H15 N O3, tgt=28.00, overall=28.00 ]			(258.36224, 700.53503)(257.1279, 10023.285)
3-&beta;-D-galactosyl-sn-glycerol	462673	431886	681343	152884	3-B-D-GALACTOSYL-SN-GLYCEROL [ C9H18O8, tgt= ]			(258.68478, 1063.747)(237.08543, 7767.767)(259.00217, 1434.9556)(257.12546, 3579.4404)(279.09787, 732.36914)(259.08408, 17382.805)
(<i>E</i>)-4-hydroxy-3-methylbut-2-en-1-yl diphosphate	181151	185843	145954	145900	HYDROXY-METHYL-BUTENYL-DIP [ C5 H9 O8 P2, tgt=24.28, overall=24.28 ]			(258.97937, 11789.57)(282.02847, 15772.709)
<i>S</i>-methyl-5-thio-&alpha;-D-ribose 1-phosphate / 5-(methylsulfanyl)-ribulose 1-phosphate	479427	545814	1873172	666744	CPD-444 [ C6 H11 O7 P S, tgt=3.45, overall=3.45 ]			(259.00998, 932.68256)(244.36359, 16777.328)(244.3337, 8510.337)(244.9985, 4008.3052)
&alpha;-D-galactose 1-phosphate / &alpha;-D-glucopyranose 1-phosphate / &alpha;-D-glucose 6-phosphate / &alpha;-D-mannopyranose 6-phosphate / &alpha;-D-mannose 1-phosphate / &beta;-D-fructofuranose 1-phosphate / &beta;-D-fructofuranose 6-phosphate / &beta;-D-glucopyranose 1-phosphate / &beta;-D-glucose 6-phosphate / &beta;-D-mannopyranose 6-phosphate / &beta;-L-galactose 1-phosphate / &beta;-L-gu…	3.44741e+06	3.09457e+06	3399449	3.19961e+06	GALACTOSE-1P [ C6 H11 O9 P, tgt=27.06, overall=27.06 ]			(259.01035, 872.97504)(241.0033, 253894.5)(242.00409, 72551.8)(241.0042, 254665.58)(242.005, 73346.016)
2-dehydro-3-deoxy-D-octonate / 3-deoxy-&alpha;-D-<i>manno</i>-2-octulosonate	1	85532.1	1	1	CPD-19753 [ C8 H13 O8, tgt=46.56, overall=46.56 ]			(259.11145, 2174.6924)(237.08382, 7848.0146)
1-(&beta;-D ribofuranosyl)nicotinamide	83185.1	43267.1	39758.8	1	NICOTINAMIDE_RIBOSE [ C11 H15 N2 O5, tgt=19.13, overall=19.13 ]			(259.11197, 2666.389)(237.08423, 7573.075)(281.10306, 3685.67)
13-apo-&beta;-carotenone	638966	740665	809890	779796	CPD-13369 [ C18 H26 O, tgt=64.32, overall=64.32 ]			(259.2031, 26436.387)(260.20618, 3182.5686)
5-phospho-D-arabinonohydroxamate	4.80118e+06	3.82418e+06	4.42029e+06	3.26455e+06	CPD-15157 [ C5 H10 N O9 P, tgt=12.63, overall=12.63 ]			(260.01123, 2845.0007)(241.37843, 231155.58)(242.00418, 72874.164)(265.02112, 8384.562)
pyrithiamine	43226.4	67138.8	49752.4	1	CPD-15777 [ C14 H20 N4 O, tgt=47.22, overall=47.22 ]			(260.1571, 6254.415)(242.15472, 3614.88)(260.19342, 3891.9016)(268.15045, 2271.3599)
4-coumaroylhexanoylmethane	515943	86120.8	1	1	CPD-13647 [ C16 H20 O3, tgt=67.15, overall=67.15 ]			(261.1416, 23840.232)(262.14676, 5366.6455)(243.13068, 3427.8826)(246.14154, 2705.62)(260.1571, 3604.415)
(2E)-hexadecenal	482985	704990	434279	491085	CPD-292 [ C16 H30 O, tgt=83.05, overall=83.05 ]			(261.2188, 28459.775)(262.22183, 3938.0889)(243.20818, 4483.7104)
(<i>E,E</i>)-farnesylacetone	1	36548	87388.9	1	CPD-12898 [ C18H30O, tgt= ]			(262.22162, 1347.76)(280.26004, 6758.015)
2-benzyl-thiohydroximate-O-sulfate	12540.8	276139	27731.2	249986	CPD-13006 [ C8 H7 N O4 S2, tgt= ]			(263.01398, 5887.7)(245.00368, 4211.162)
&alpha;-D-glucosamine 1-phosphate	1	86254.6	1	136710	GLUCOSAMINE-1P [ C6 H13 N O8 P, tgt= ]			(263.0514, 477.465)(263.01437, 7713.626)
L-cystine	12540.8	302871	27731.2	311388	CYSTINE [ C6 H12 N2 O4 S2, tgt= ]			(263.05148, 419.2125)(243.0521, 373.93)(263.01404, 5600.2305)(245.00362, 3536.5823)
&beta;-L-fucose 1-phosphate / 2-deoxyglucose 6-phosphate	302475	254704	1	29339.6	CPD-488 [ C6 H11 O8 P, tgt=35.34, overall=35.34 ]			(263.05728, 1223.9064)(243.05212, 1253.7731)
D-mannitol 1-phosphate / D-sorbitol 6-phosphate	382708	418057	361462	241655	MANNITOL-1P [ C6 H13 O9 P, tgt=35.46, overall=35.46 ]			(263.05777, 1036.41)(284.02744, 3724.2861)(285.02817, 593.50684)
1,3,5,6-tetrahydroxyxanthone / 1,3,5,8-tetrahydroxyxanthone / 1,3,6,7-tetrahydroxyxanthone	3.25162e+06	2.11152e+06	1.78152e+06	2144805	CPD-6886 [ C13 H7 O6, tgt=44.73, overall=44.73 ]			(263.05893, 1228.765)(284.40845, 2952.2812)(285.02728, 628.27)
O-phospho-L-tyrosine	3296151	2.111e+06	1.32644e+06	2.09205e+06	CPD-3728 [ C9 H10 N O6 P, tgt=41.02, overall=41.02 ]			(263.05893, 1233.1581)(284.4775, 2635.354)(285.02713, 622.0916)
(6R)-4a-hydroxy-tetrahydrobiopterin	133334	369644	1	352452	CPD-5881 [ C9 H15 N5 O4, tgt=47.60, overall=47.60 ]			(263.13745, 1163.1724)(257.1357, 17240.1)(258.1396, 1337.1575)
3''-hydroxy-geranylhydroquinone	423825	507944	1.10701e+06	792671	CPD-9320 [ C16 H22 O3, tgt=54.31, overall=54.31 ]			(263.1608, 14908.81)(264.1639, 548.84)(248.1621, 714.0524)(262.1779, 43710.23)(263.1806, 5583.9775)(264.1854, 584.63)
1-(3,4-dihydroxyphenyl)-5-hydroxy-3-decanone	1	213158	57959.4	97620.1	CPD-13495 [ C16 H24 O4, tgt=61.62, overall=61.62 ]			(263.16165, 15362.149)(264.16467, 836.7145)
(+)-marmesin / benzyl-6-hydroxy-2-cyclohexene-on-oyl	1	1	117846	1	CPD-8191 [ C14 H14 O4, tgt= ]			(264.12018, 21001.844)(265.13464, 4847.13)
3-oxo-myristate	453065	289616	694065	331759	CPD-14242 [ C14 H25 O3, tgt=70.09, overall=70.09 ]			(264.16708, 3908.7717)(246.1578, 16088.986)(247.16039, 1457.921)
L-selenocystathionine	393827	484877	216860	227738	CPD-13717 [ C7 H14 N2 O4 Se, tgt=57.90, overall=57.90 ]			(265.0205, 7098.745)(272.26147, 231.88998)(273.00705, 501.245)(259.01044, 414.30252)(253.01363, 783.8196)(254.02168, 174.8125)(293.26727, 23147.371)(294.8702, 7327.6753)(295.87036, 10006.876)(296.51453, 16656.72)(297.06506, 2055.3818)(266.0331, 9303.837)(268.46524, 2332.062)(268.03162, 394.93378)(273.0418, 5240.11)(295.85623, 657.9193)(289.0116, 157.93)(279.54562, 2833.442)
3&beta;-hydroxyparthenolide	771911	170956	811400	526020	CPD-16767 [ C15 H20 O4, tgt=22.11, overall=22.11 ]			(265.49075, 1775.5225)(267.44043, 9147.208)(268.6531, 11458.581)(269.15433, 2507.1782)(249.63823, 5582.266)(250.13396, 20363.113)(265.54852, 1811.0621)(249.90894, 9827.134)(250.71379, 709.5243)(282.37744, 9882.796)(283.17007, 1471.475)(264.16653, 1517.26)
(+)-heliannuol F / epoxypseudoisoeugenol-2-methylbutanoate / heliespirone C	719836	1	1	526020	CPD-9886 [ C15 H20 O4, tgt=22.11, overall=22.11 ]			(265.97324, 1044.1233)(268.15256, 14183.866)(269.1557, 1533.1199)(249.13649, 8327.159)(248.1293, 1222.1)(265.14893, 2567.7998)(249.53873, 10736.799)(250.14009, 713.0967)(282.73978, 8793.68)(283.17114, 1565.165)
oxythiamine	187076	252750	282667	210820	CPD-15776 [ C12 H16 N3 O2 S, tgt=42.51, overall=42.51 ]			(266.12094, 11793.132)(271.0762, 2751.532)
dihydroxyphaseic acid	152894	221348	112204	169565	CPD-7726 [ C15 H21 O5, tgt=43.37, overall=43.37 ]			(266.13742, 3683.7527)(281.1567, 8877.7705)
artemisinin	1	1	1	530531	CPD-7561 [ C15 H22 O5, tgt= ]			(266.64297, 3089.8835)(268.15262, 18272.85)(269.15576, 1960.7065)(265.34882, 3709.2378)(266.15665, 1854.105)(302.1941, 1887.93)(282.16763, 8945.426)(283.17114, 1565.165)
2'-deoxyguanosine / 2-oxo-2'-deoxyadenosine / 3'-azido-3'-deoxythymidine / adenosine	2.12105e+07	22050000	24737500	23075000	DEOXYGUANOSINE [ C10 H13 N5 O4, tgt=88.83, overall=88.83 ]			(267.09488, 2256.371)(268.10245, 1001160.25)(269.10474, 107947.31)(270.10587, 10704.036)(286.13638, 1953.391)(291.08087, 4881.3657)
thiamine	87129	124989	134014	140580	THIAMINE [ C12 H17 N4 O S, tgt=8.44, overall=8.44 ]			(267.11697, 4932.3667)(267.11813, 6987.9155)(283.15097, 9725.569)(291.09464, 309.432)
p-coumaroyltyramine	87092.6	124561	134014	140264	CPD-8943 [ C17 H17 N O3, tgt=40.70, overall=40.70 ]			(267.11734, 5098.7266)(267.11826, 8099.68)(306.16675, 8236.78)(283.15097, 9725.569)
2-phenylethyl &beta;-<i>D</i>-glucopyranoside	1	97428.8	13716.9	136475	CPD-14528 [ C14 H20 O6, tgt=11.75, overall=11.75 ]			(267.11804, 8255.678)(306.16714, 4598.6445)(307.17157, 339.905)
linamarin	234742	1	38759.9	1	LINAMARIN [ C10 H17 N O6, tgt=60.72, overall=60.72 ]			(267.47888, 662.57666)(268.1509, 1718.07)(248.93344, 9183.829)(248.1294, 1288.365)
F-PU	113413	127208	23473.1	71234.4	CPD-5483 [ C12 H9 Cl F N3 O, tgt=49.36, overall=49.36 ]			(268.08185, 1238.3313)(271.04834, 1802.2417)(252.0307, 154.87)(249.04314, 39335.594)(251.04216, 4142.9546)(275.77588, 1962.4926)
salicin	2.35452e+07	24462500	27475000	25637500	CPD-1142 [ C13 H18 O7, tgt=56.02, overall=56.02 ]			(268.10187, 1014998.2)(269.10422, 107826.1)(270.1053, 10823.756)(269.10526, 108980.36)(270.10638, 10705.592)(304.14645, 640.285)(286.1361, 2136.7378)(309.09003, 3624.7998)(310.0861, 935.425)(291.08087, 4941.874)
8-hydroxy-7-methoxy-flavone / formononetin / isoformononetin	2.13859e+07	1.42478e+07	2.30242e+07	23325000	CPD-15484 [ C16 H12 O4, tgt=43.22, overall=43.22 ]			(268.1023, 891768.9)(269.10486, 110265.27)(270.106, 10925.124)(293.11353, 1301.4269)(277.0648, 959.4055)
inosine	2.12917e+07	22137500	24837500	23125000	INOSINE [ C10 H12 N4 O5, tgt=88.83, overall=88.83 ]			(268.10245, 1004524.3)(269.10474, 108317.63)(270.10587, 10746.153)(277.06522, 404.2311)
(-)-sativan	2.32917e+07	23987500	27175000	25512500	CPD-9367 [ C17 H18 O4, tgt=37.90, overall=37.90 ]			(268.10245, 1010889.94)(269.10474, 108998.4)(270.10587, 10825.264)(304.14645, 640.285)(286.13638, 1936.7306)
hexadecanedioate	1.22384e+06	294554	271860	396616	CPD-10511 [ C16 H28 O4, tgt=20.02, overall=20.02 ]			(268.1876, 1543.1735)(302.2284, 2520.25)(284.21866, 1100.509)
2,4-dinitrobenzenesulfonyl chloride	129954	309435	720977	1077094	CPD-14842 [ C6 H3 Cl N2 O6 S, tgt=43.33, overall=43.33 ]			(268.94333, 10576.964)(269.9452, 2285.3)(270.9433, 3303.95)(272.9528, 11066.94)
11-hydroxyvittatine / lycorine	2.41412e+06	2.50928e+06	2.85231e+06	2.72447e+06	CPD-19447 [ C16 H17 N O4, tgt=68.68, overall=68.68 ]			(269.10477, 111832.69)(270.10587, 11147.03)
cinnamoyltyramine	310197	598209	213048	608308	CPD-8941 [ C17 H17 N O2, tgt=22.11, overall=22.11 ]			(269.13278, 289.62997)(285.16678, 20963.617)(286.17, 1900.2269)(267.1565, 1242.16)
(indol-3-yl)acetyl-L-isoleucine / (indol-3-yl)acetyl-L-leucine	20372.1	23334.6	64330	1	CPD-11227 [ C16 H19 N2 O3, tgt= ]			(269.13293, 653.63336)(305.18182, 10097.088)(306.18484, 1029.0701)(311.12335, 8872.6)
4'-<i>O</i>, <i>N</i>-dimethylnorbelladine	1	1	64330	1	CPD-19450 [ C17 H21 N O3, tgt= ]			(269.1333, 317.74)(305.18225, 14292.135)(306.18484, 1029.0701)
galanthamine	1	1	225013	1	CPD-19430 [ C17 H21 N O3, tgt= ]			(269.1333, 317.74)(305.18225, 14292.135)(306.18484, 1029.0701)(312.15182, 7202.365)(313.15424, 287.3425)
indol-3-ylmethyl-L-cysteine	2.20926e+06	5.4125e+06	1.9125e+06	1.14625e+07	CPDQT-427 [ C12 H14 N2 O2 S, tgt=22.33, overall=22.33 ]			(269.4385, 325479.62)(269.1058, 106262.0)(270.1069, 10289.813)(277.06528, 351.10336)
6,7-dehydrobaicalein / coumestrol	94458	83974.1	57465.1	48465.5	CPD-15172 [ C15 H8 O5, tgt=36.60, overall=36.60 ]			(269.79944, 3691.1726)(273.0443, 1965.315)(252.0308, 292.54)(271.04852, 1997.7207)(251.04106, 4663.5835)(291.08087, 2991.7756)(273.0788, 321.4975)(291.0183, 696.356)(277.03003, 2060.2493)
methoxyanigorufone	1272454	1.11142e+07	1.70559e+06	2.63822e+06	CPD-12209 [ C20 H14 O2, tgt=29.85, overall=29.85 ]			(269.83633, 28129.355)(270.10507, 8860.469)(309.09003, 4531.0)(310.0861, 1169.275)(291.08087, 5646.8057)
<i>N</i>-pentylpantothenamide / 5&alpha;-androstane-3,17-dione	1	1	36224.6	1	CPD0-1152 [ C14 H28 N2 O4, tgt= ]			(270.1994, 12164.09)(271.2018, 260.5)
<i>N</i>-acetylglutamyl-phosphate	321737	308808	95942.8	179308	N-ACETYL-GLUTAMYL-P [ C7 H9 N O8 P, tgt=61.85, overall=61.85 ]			(271.0123, 1224.8917)(253.01347, 946.5456)(253.01492, 552.84204)(254.02205, 154.95999)(266.03302, 10408.816)(267.03476, 761.97644)(268.0316, 485.68002)(274.0006, 149.28)
apigenin / emodin / genistein / pelargonidin	42268.5	62428.5	1	1	CPD-431 [ C15 H9 O5, tgt=36.60, overall=36.60 ]			(271.04834, 2807.9238)(251.23904, 5482.13)(271.04892, 2988.464)(273.07886, 461.3525)
(<i>E</i>)-1-(L-cystein-<i>S</i>-yl)-<i>N</i>-hydroxy-&omega;-(methylsulfanyl)pentan-1-imine	527404	266888	503586	553073	CPDQT-406 [ C9 H18 N2 O3 S2, tgt=6.45, overall=6.45 ]			(271.07147, 1196.495)(267.09494, 3375.943)(268.1025, 1010213.5)(269.10483, 109516.67)(273.04367, 8875.565)
(4a<i>R</i>,10b<i>S</i>)-noroxomaritidine / (4a<i>S</i>,10b<i>R</i>)-noroxomaritidine / <i>N</i>-demethylnarwedine / caranine / crinine / noroxopluviine / vittatine	531132	484297	686379	563719	CPD-19435 [ C16 H17 N O3, tgt=55.06, overall=55.06 ]			(271.14157, 27209.217)(272.14447, 3164.375)
ribose-1-arsenate	139601	143720	140551	111159	RIBOSE-1-ARSENATE [ C5 H9 As O8, tgt=42.79, overall=42.79 ]			(271.95093, 401.535)(272.95453, 11253.185)(273.9543, 630.44995)(274.9525, 790.48)(259.9621, 391.67)(275.9819, 417.28)(296.9404, 958.1476)
17-oxosparteine	94522	121081	92571.2	193757	CPD-8919 [ C15 H25 N2 O, tgt= ]			(272.18326, 20623.977)(273.18594, 1650.88)
lupanine	94522	121081	92571.2	193757	CPD-8917 [ C15 H25 N2 O, tgt= ]			(272.18326, 20623.977)(273.18594, 1650.88)
clorgyline	340541	202544	269828	278026	CPD-7656 [ C13 H15 Cl2 N O, tgt=19.68, overall=19.68 ]			(273.04285, 8290.921)(277.06482, 1716.7091)(291.08087, 3425.7107)(277.02985, 2919.323)
&alpha;-D-glucose 1-methylene-phosphonate	230144	221944	271545	178048	CPD0-1029 [ C7 H14 O9 P, tgt=6.26, overall=6.26 ]			(273.04285, 9121.635)(274.04526, 504.135)(291.07993, 3497.9202)(277.06482, 2223.899)
tetcyclacis	669902	584646	1.06243e+06	838762	TETCYCLACIS [ C13 H12 Cl N5, tgt=40.51, overall=40.51 ]			(273.07877, 471.97)(296.06384, 63651.188)(297.0658, 4427.1587)(298.06226, 3662.9038)
dicranin	28419.5	1	58112	1	CPD-12654 [ C18H25O2, tgt= ]			(273.1816, 9167.42)(274.1848, 275.695)(275.1969, 1228.08)(260.1978, 392.28)(295.2232, 4528.74)(277.2129, 2606.36)
17&beta;-estradiol	99903.9	230951	170164	301609	CPD-352 [ C18H24O2, tgt= ]			(273.1818, 4566.56)(274.1844, 267.79)(254.1721, 2423.095)(275.198, 247.92)(290.20862, 13643.479)(291.21036, 2017.8883)(277.21326, 975.12665)
methyl (<i>2E,6E</i>)-farnesoate	640352	826955	662682	698325	CPD-12586 [ C16 H26 O2, tgt=55.87, overall=55.87 ]			(273.51767, 1387.618)(233.1879, 23731.645)(234.19106, 2374.6084)(251.19801, 2471.9548)
hexanediol 1,6-bisphosphate	1	1	19194	1	CPD0-967 [ C6 H12 O8 P2, tgt= ]			(274.0005, 1016.28)(259.0083, 1612.19)
2,4,6-trinitrobenzene sulfonate	10176.6	20188.9	43525.8	1	CPD-12153 [ C6 H2 N3 O9 S, tgt= ]			(274.9525, 790.48)(292.97272, 5320.0303)(293.9736, 1234.47)(294.97025, 1354.1829)
(9Z,12Z)-octadecadien-6-ynoate	733555	800772	711718	944275	CPD-12652 [ C18 H27 O2, tgt=55.10, overall=55.10 ]			(275.19794, 21500.693)(276.201, 1994.995)(277.21268, 226.547)(257.18768, 14876.507)(258.19122, 1838.8607)(279.2284, 171.24)
stearidonate	1.13682e+06	1.13857e+06	950148	1.66263e+06	CPD-12653 [ C18 H27 O2, tgt=55.10, overall=55.10 ]			(275.198, 32337.248)(276.20056, 4590.567)(277.21268, 226.547)(257.1876, 11133.097)(258.19122, 1838.8607)(259.20233, 280.3675)(279.2284, 171.24)
1-(p-butylphenyl)-2,2-dimethyl-4,6-diamino-1,2-dihydro-s-triazine	215958	187919	339896	463027	CPD0-1590 [ C15 H23 N5, tgt=51.41, overall=51.41 ]			(275.1983, 52152.797)(276.19925, 10900.131)
2-C-methyl-D-erythritol-2,4-cyclodiphosphate	200710	250084	60005.5	1	2C-METH-D-ERYTHRITOL-CYCLODIPHOSPHATE [ C5 H10 O9 P2, tgt=20.34, overall=20.34 ]			(275.9819, 417.28)(259.06897, 12793.631)(260.97324, 677.2373)(258.9804, 10300.11)
(-)-jasmonoyl-1-aminocyclopropane-1 carboxylate	22709.9	63688.2	60518.8	1	CPD-19728 [ C16 H22 N O4, tgt=45.19, overall=45.19 ]			(276.15622, 5485.652)
palmitoleate	30650.9	97310.5	116606	117353	CPD-9245 [ C16 H29 O2, tgt=7.49, overall=7.49 ]			(276.20096, 4807.1113)(277.2138, 378.68)(258.28302, 3410.7407)
7-[(2S)-2-amino-2-carboxylatoethyl]-5-hydroxy-2H-1,4-benzothiazine-3-carboxylate / 8-[(2S)-2-amino-2-carboxylatoethyl]-5-hydroxy-2H-1,4-benzothiazine-3-carboxylate	1	1	1	57912.8	CPD-20263 [ C12 H11 N2 O5 S, tgt= ]			(277.0305, 7079.3867)(299.0452, 25721.13)(300.0463, 8347.55)(282.0291, 2073.27)(295.73, 10257.307)(297.06705, 789.565)(298.06323, 801.155)(301.0148, 544.69)
5-mercaptodeoxyuridine	240306	210764	217016	222876	CPD0-1342 [ C9 H11 N2 O5 S, tgt=56.47, overall=56.47 ]			(277.06543, 1138.327)(262.95953, 1029.4075)(282.0284, 13391.379)(283.0294, 4124.6133)(265.02057, 8014.6177)
tolcapone	142651	100820	105863	177264	CPD-7664 [ C14 H11 N O5, tgt=23.32, overall=23.32 ]			(277.067, 522.95)(291.09457, 8856.29)(276.92902, 3973.4355)(298.0624, 2582.13)
hemigossypolone	5.6928e+06	3.80694e+06	4.72122e+06	3.50917e+06	CPD-9749 [ C15 H15 O5, tgt=7.82, overall=7.82 ]			(277.09018, 1032.319)(295.1367, 218.11)(300.09174, 6223.4746)
furaneol glucopyranoside	88639.2	115614	164072	114376	CPD-10216 [ C12 H18 O8, tgt=47.20, overall=47.20 ]			(277.1039, 3950.9033)(291.09528, 8361.86)(311.14224, 1013.7677)
5-amino-6-(D-ribitylamino)uracil	557898	2.57019e+06	1.56499e+06	2.36313e+06	AMINO-RIBOSYLAMINO-1H-3H-PYR-DIONE [ C9 H16 N4 O6, tgt=42.57, overall=42.57 ]			(277.10394, 2791.0225)(259.09387, 22950.0)(260.09705, 1747.2711)(264.1208, 2779.955)(279.1361, 51.805)(280.1368, 23.68)(299.09647, 23132.617)(300.09177, 6969.0874)
2-[(7'-methylsulfanyl)heptyl]malate	856668	1	1	1	CPDQT-35 [ C12 H20 O5 S, tgt=46.87, overall=46.87 ]			(277.10522, 1873.365)(259.09332, 15326.92)(260.09473, 261.83502)(280.1358, 40.02)
octyl &beta;-D-glucopyranoside	1.0753e+06	1.06409e+06	1.23942e+06	949314	CPD-7655 [ C14 H28 O6, tgt=74.04, overall=74.04 ]			(277.1932, 278.62)(276.5295, 10549.958)(277.19427, 500.78)(311.21796, 1186.194)(296.19742, 20960.525)(297.20038, 4703.468)(293.20798, 12479.999)(294.211, 1479.603)
(+)-vernolate / 18-oxo-oleate / 9,10-epoxy-12-cis-octadecenoate / densipolate / dimorphecolate / vernolate	1.11372e+06	812137	1127806	1.24052e+06	CPD-14396 [ C18 H31 O3, tgt=53.26, overall=53.26 ]			(277.21347, 22157.785)(278.21655, 2980.477)(279.2285, 422.5837)(279.22803, 850.8025)(313.26944, 6835.4385)(314.27325, 506.22177)(301.21265, 1130.5896)
&alpha;-linolenate	876456	831861	1.02913e+06	792899	LINOLENIC_ACID [ C18 H29 O2, tgt=55.28, overall=55.28 ]			(277.21353, 34629.71)(278.2166, 5033.98)(279.2285, 617.40625)(260.52106, 16257.076)(261.5241, 2162.7136)(279.22778, 934.72)(261.21832, 11523.327)(262.2214, 1858.2773)(301.21262, 1549.0076)(283.20276, 1649.7788)
&alpha;-eleostearate / &gamma;-linolenate / calendate / crepenynate / punicate	827317	407807	596804	792899	CPD-8231 [ C18 H29 O2, tgt=55.28, overall=55.28 ]			(277.21353, 34629.71)(278.2166, 5033.98)(279.2285, 617.40625)(261.21893, 10511.774)(262.222, 1582.88)(279.22778, 934.72)(261.21832, 11523.327)(262.2214, 1858.2773)(301.21262, 1549.0076)(283.20276, 1649.7788)
4-coumaroylagmatine	1	1	12770.8	1	N-4-GUANIDINOBUTYL-4-HYDROXYCINNAMAMID [ C14 H21 N4 O2, tgt= ]			(278.1715, 5940.91)(283.1496, 297.22)
vernoleate	156309	136046	176484	167908	CPDQT-98 [ C18 H32 O3, tgt=40.43, overall=40.43 ]			(278.21658, 4817.254)(279.22858, 601.66565)(279.22842, 2579.7434)(280.2333, 290.02)(314.27335, 768.04346)(296.9268, 3030.0166)(324.23102, 821.43756)(301.21262, 1695.9745)
4-prenylphlormethylbutanophenone	71541	133806	1	70607.2	CPD-19785 [ C16 H21 O4, tgt= ]			(279.15625, 2562.451)(279.1554, 1277.435)(295.16977, 10566.647)(296.17325, 763.2)
4-prenylphlorisovalerophenone	174086	133806	134547	70607.2	CPD-7109 [ C16 H21 O4, tgt= ]			(279.15625, 2562.451)(279.1554, 1277.435)(295.16977, 10566.647)(296.17325, 763.2)(300.14084, 7359.765)(282.11838, 1164.7032)
lotaustralin	1.06172e+06	879110	982407	980798	CPD-10277 [ C11 H19 N O6, tgt=82.45, overall=82.45 ]			(279.1563, 30036.139)(280.15918, 3358.7913)
linoleate	599691	724026	737084	570690	LINOLEIC_ACID [ C18 H31 O2, tgt=56.48, overall=56.48 ]			(279.22864, 2483.955)(280.2311, 107.63)(261.2188, 26656.662)(262.22183, 3593.8804)(263.2335, 114.01)(280.25992, 3490.8757)
(9Z,12E)-octadecadienoate	518118	724026	524545	500101	CPD-8203 [ C18 H31 O2, tgt=56.48, overall=56.48 ]			(279.22867, 2530.7314)(261.2188, 28286.799)(262.22183, 3896.7842)
18-hydroxyoleate / 9,10-epoxystearate / ricinoleate	1	1	66853.4	33893	18-HYDROXYOLEATE [ C18 H33 O3, tgt=46.64, overall=46.64 ]			(279.22888, 13662.333)(280.2323, 280.88333)
elwesine / maritinamine	96958.5	383342	80415.6	375662	CPD-19423 [ C16 H21 N O3, tgt=23.25, overall=23.25 ]			(280.1724, 936.61005)(257.1359, 19115.135)(258.1396, 1373.3313)(280.1741, 359.13663)
cycloheximide	198456	150190	474831	482938	CPD-7099 [ C15 H23 N O4, tgt=12.91, overall=12.91 ]			(281.15616, 8957.423)(266.15747, 2465.2197)(282.16663, 11537.658)(283.17017, 1959.7299)(264.16644, 2232.015)(307.16507, 1986.3274)
<i>N</i>-(4-aminobenzoyl)-L-glutamate	1	1	59989.6	1	CPD0-889 [ C12 H12 N2 O5, tgt= ]			(282.11633, 2644.6619)(264.10464, 4589.8438)(291.08044, 8384.674)
salidroside	286367	672952	201748	613079	CPD-13354 [ C14 H20 O7, tgt=0.13, overall=0.13 ]			(282.11633, 902.42)(301.51337, 14901.135)(302.14008, 1965.678)(301.084, 16382.823)(302.14188, 2242.3882)
7'-hydroxyabscisate / 8'-hydroxyabscisate /9'-hydroxyabscisate / neophaseate / phaseic acid	416058	524229	438920	431498	CPD-17688 [ C15 H19 O5, tgt=18.88, overall=18.88 ]			(282.1297, 1706.474)(284.09616, 25996.898)(285.09842, 1260.0336)(286.0899, 258.24)
10',6-diapocarotene-10',6-dial	141875	146711	613415	434015	CPD-13373 [ C19 H22 O2, tgt=10.06, overall=10.06 ]			(282.16666, 10524.322)(283.17007, 1663.0433)(265.5801, 2239.9944)(266.15527, 1500.3826)(265.48697, 6296.238)(266.1504, 1364.405)(302.36115, 1923.7632)(307.16507, 1812.9967)
oryzalexin C	389181	735588	980075	812378	CPD-16614 [ C20 H28 O2, tgt=47.32, overall=47.32 ]			(282.20352, 19399.473)(283.2066, 2053.356)(304.24478, 1897.0085)(305.18256, 4336.022)(306.18484, 546.695)
a linoleate group	720238	285500	720740	209306	CPD-17716 [ C18 H32 O, tgt=43.14, overall=43.14 ]			(282.2762, 19527.154)(283.2787, 2112.2856)
3-dehydrosphinganine (C18)	549656	305152	813399	218217	DEHYDROSPHINGANINE [ C18 H38 N O2, tgt=29.10, overall=29.10 ]			(282.27625, 19861.846)(283.27878, 2177.2188)
sphingosine	1	1	1	218217	SPHINGOSINE [ C18H38NO2, tgt= ]			(282.27695, 14735.314)(283.27933, 635.64746)
munjistin	1.1279e+06	986096	739683	1.15065e+06	CPD-9759 [ C15 H7 O6, tgt=31.57, overall=31.57 ]			(283.02936, 2857.6902)(265.02014, 6410.8296)(284.0273, 2671.5884)(285.028, 427.10956)(268.03146, 385.46286)(290.18167, 570.96625)(291.0166, 1008.025)
(2<i>E</i>,6<i>E</i>)-farnesyl phosphate	86622.9	124664	107148	120694	CPD-12587 [ C15 H25 O4 P, tgt=22.20, overall=22.20 ]			(283.1497, 7501.52)(306.16684, 7905.8047)(283.1511, 9578.154)(321.18805, 13935.838)(322.1906, 2422.47)(305.1196, 6538.6553)
EHNA	700883	633980	831015	917560	EHNA [ C14 H23 N5 O, tgt=83.07, overall=83.07 ]			(283.20282, 1869.9579)(295.2242, 15716.67)(296.2276, 1690.81)(277.21347, 29497.32)(278.2165, 3882.4465)(279.22858, 527.7745)
3''-deamino-3''-oxonicotianamine	325704	168714	555311	1	CPD-7228 [ C12 H17 N2 O7, tgt=59.85, overall=59.85 ]			(284.09503, 19273.871)(285.09766, 585.93005)(284.0972, 23085.56)(285.0993, 809.73)(286.0899, 258.24)(319.81546, 15150.266)(320.1492, 4277.3)(305.11932, 4281.872)(307.0776, 1222.5599)(308.0875, 24417.39)(309.09015, 1078.74)
(1,4)-&beta;-xylobiose / 3-methylinosine	102546	1	134547	1	CPD-13037 [ C10 H18 O9, tgt= ]			(284.09586, 17602.236)(285.09818, 1160.5084)(267.09454, 1835.9733)(268.10202, 786324.5)(269.10452, 84816.15)(270.10556, 8268.873)(304.1463, 617.17)(282.11838, 1164.7032)(308.08685, 1965.1699)(291.08057, 2682.84)
xanthosine	456455	445016	539967	264789	XANTHOSINE [ C10 H12 N4 O6, tgt=51.84, overall=51.84 ]			(284.09595, 15405.888)(285.09824, 840.9345)(286.0899, 135.91)(292.79337, 17295.455)(294.06424, 2224.151)
(-)-maackiain / (+)-maackiain / 2-hydroxyformononetin / 7,2'-dihydroxy-4',5'-methylenedioxyisoflav-3-ene / 7,4'-dihydroxy, 8-methoxyflavone / calycosin / genkwanin / prunetin / robustaquinone D / wogonin	46731.4	1	181777	431498	CPD-3631 [ C16 H12 O5, tgt=38.35, overall=38.35 ]			(284.09598, 23000.219)(285.09848, 548.07916)
8-oxo-deoxyguanosine	46731.4	1	181777	431498	CPD-12381 [ C10 H13 N5 O5, tgt=60.98, overall=60.98 ]			(284.09598, 23000.219)(285.09848, 548.07916)(267.09567, 3081.9612)(307.0783, 1348.9757)(291.08188, 3349.6384)
9-&beta;-D-arabinofuranosylguanine	46731.4	1	181777	431498	CPD-15142 [ C10 H13 N5 O5, tgt=60.98, overall=60.98 ]			(284.09598, 23000.219)(285.09848, 548.07916)(267.09567, 3081.9612)(307.0783, 1348.9757)(291.08188, 3349.6384)
benzoyl-&beta;-D-glucopyranose	667929	745296	771810	629053	CPD-12630 [ C13 H16 O7, tgt=23.52, overall=23.52 ]			(284.09607, 15716.845)(285.09836, 838.02765)(286.0899, 135.91)(267.0941, 2194.7737)(307.07626, 3633.4421)(308.08606, 795.67505)(291.0808, 3850.812)
(9Z)-octadec-9-ene-1,18-diol	1358101	1.71349e+06	1.23674e+06	1551143	CPD-17644 [ C18 H36 O2, tgt=41.33, overall=41.33 ]			(284.29205, 49950.562)(285.29492, 7100.531)(286.3042, 1073.0717)
L-<i>threo</i>-sphinganine (C18) / sphinganine (C18)	1.53045e+06	1.94638e+06	1.38245e+06	1.76622e+06	CPD-13613 [ C18 H40 N O2, tgt=41.61, overall=41.61 ]			(284.29208, 53091.277)(285.29492, 7699.3794)(286.3042, 1161.6652)
tributyrin	309996	313148	217822	635091	CPD-13014 [ C15 H26 O6, tgt=49.58, overall=49.58 ]			(285.166, 15247.19)(286.1691, 946.83)(305.18295, 4646.1733)(306.1851, 592.65)(285.1672, 21406.576)(286.17047, 2001.2156)(302.1926, 10165.63)(303.1955, 904.375)(312.16306, 2859.76)
piperine	317270	384377	199378	575649	N-EE-PIPEROYL-PIPERIDINE [ C17 H19 N O3, tgt=22.11, overall=22.11 ]			(286.14026, 690.43)(269.13278, 289.62997)(305.75137, 9370.572)(307.778, 1702.1731)(285.1667, 17565.332)(286.17007, 1981.1439)(311.12537, 2161.355)
1,18-octadecane-diol	743427	755618	723924	678521	CPD-17643 [ C18 H38 O2, tgt=36.47, overall=36.47 ]			(286.30728, 14525.669)(287.31046, 1092.5034)
indol-3-yl-acetothiohydroxamate-O-sulfonate	35048.1	1	1	1	CPD-1881 [ C10 H8 N2 O4 S2, tgt=47.42, overall=47.42 ]			(286.99695, 1177.1233)(289.0118, 556.1767)(292.97256, 2836.71)(293.9741, 687.51)(294.97058, 379.13998)
(+)-taxifolin / (2S)-dihydrotricetin / 1-(3,4-dihydroxyphenyl)-3-(2,4,6-trihydroxyphenyl)propane-1,3-dione	5.43786e+06	3440388	5054021	5.40052e+06	CPD-474 [ C15 H11 O7, tgt=76.61, overall=76.61 ]			(287.05148, 7023.4766)(288.05447, 848.4466)(303.04764, 224982.53)(304.05023, 29260.264)(305.05203, 3310.5269)
(4<i>S</i>)-2,3-dehydroleucopelargonidin / 1,3,8-trihydroxy-2-methoxyanthraquinone / aureusidin / scutellarein / (4<i>S</i>)-2,3-dehydro-leucocyanidin / <i>cis</i>-12-sulfojasmonate / 2-hydroxyeriodictyol	1.60876e+06	1.10344e+06	1.10264e+06	857133	CPD-19725 [ C15 H10 O6, tgt=68.84, overall=68.84 ]			(287.05252, 67404.09)(288.0553, 8234.808)(289.05713, 328.43)
(2S)-eriodictyol	1.80492e+06	1.22934e+06	1.23667e+06	953670	CPD-6994 [ C15 H11 O6, tgt=62.96, overall=62.96 ]			(287.05252, 68811.73)(288.0553, 8442.6045)(289.05713, 328.43)
1-(4-hydroxyphenyl)-3-(2,4,6-trihydroxyphenyl)propane-1,3-dione / 2-chloro-2'-deoxyadenosine / 2-hydroxynaringenin / dalbergioidin	1.80492e+06	1.22934e+06	1.23667e+06	953670	CPD-12655 [ C15 H11 O6, tgt=62.96, overall=62.96 ]			(287.05252, 68811.73)(288.0553, 8442.6045)(289.05713, 328.43)
(2-oxindol-3-yl)acetyl-L-aspartate	1	354924	1	858806	2-OXINDOLE-3-ACETYL-ASP [ C14 H12 N2 O6, tgt= ]			(287.0534, 51921.023)(288.0562, 5997.0796)
<i>N</i>-(4-hydroxybenzoyl)-L-glutamate / nitecapone	70502.9	1	1	1	CPD-11847 [ C12 H11 N O6, tgt= ]			(288.05505, 17380.83)(289.05713, 348.95502)
(-)-dihydrokaempferol / (+)-dihydrokaempferol / 2',3,4,4',6'-pentahydroxychalcone / 2,4',5,7-tetrahydroxyisoflavanone / 2,6,7,4'-tetrahydroxyisoflavanone / 2-[hydroperoxy(4-hydroxyphenyl)methyl]-6-hydroxy-1-b+A765+A758:A772+A7+A758:A772	71918.2	1	1	1	CPD-15886 [ C15 H12 O6, tgt= ]			(288.05505, 17951.336)(289.05713, 361.19)
(1<i>S</i>,2<i>R</i>)-1-C-(indol-3-yl)glycerol 3-phosphate	64428.4	124328	159138	162423	INDOLE-3-GLYCEROL-P [ C11 H12 N O6 P, tgt= ]			(289.0525, 4502.41)(273.04276, 11406.073)(303.0805, 4673.835)(291.01645, 1973.0452)
1,6,7,8-tetrahydroxy-2-methylanthraquinone / 2'-hydroxygenistein / cyanidin / kaempferol / luteolin	64428.4	111964	159138	162423	CPD-9626 [ C15 H9 O6, tgt= ]			(289.0525, 4502.41)(273.04288, 11303.013)(303.08054, 4742.143)(291.01645, 1973.0452)
capsaicin	94648.8	60667.5	126713	56114.9	CAPSAICIN [ C18 H27 N O3, tgt=24.02, overall=24.02 ]			(290.2084, 16204.632)(291.52545, 1627.7743)(333.19916, 1153.8301)
lachnanthocarpone	624761	624122	659834	585755	CPD-12203 [ C19 H12 O3, tgt=44.02, overall=44.02 ]			(291.08093, 1235.0164)(273.07874, 325.665)(293.06082, 33349.492)(294.06387, 2016.4138)(295.05988, 1572.0746)
(indol-3-yl)acetyl-L-aspartate	491877	583025	659834	440124	INDOLE-3-ACETYL-ASP [ C14 H12 N2 O5, tgt=42.43, overall=42.43 ]			(291.08096, 1860.2073)(273.079, 302.17)(273.0797, 346.63)(293.0607, 28091.85)(294.06384, 1918.7941)(295.05988, 1476.307)
canavaninosuccinate	88639.2	103080	121518	272164	CANAVANINOSUCCINATE [ C9 H15 N4 O7, tgt=44.43, overall=44.43 ]			(291.0944, 8898.397)(295.10025, 7645.84)(277.10388, 4145.5474)(311.14148, 1110.3875)(296.0646, 59096.203)(297.06647, 4340.065)(298.063, 3466.33)
bisdemethoxycurcumin	111008	90170.4	99912.6	114376	CPD-12188 [ C19 H16 O4, tgt=6.14, overall=6.14 ]			(291.09543, 8373.75)(295.1003, 8099.7134)(291.0943, 9204.638)(311.1422, 970.04895)
(9Z,13S,15Z)-12,13-epoxyoctadeca-9,11,15-trienoate / 9,10-epoxy-10,12Z,15Z-octadecatrienoate / colnelenate / dinor-12-oxo-phytodienoate	2.06689e+06	1.83599e+06	3.13562e+06	2.65636e+06	CPD-728 [ C18 H27 O3, tgt=58.20, overall=58.20 ]			(291.193, 77387.34)(292.19577, 11774.754)(293.2047, 739.84436)(273.182, 6416.3477)(274.1848, 212.735)
<i>O</i>-sinapoylcholine	1	1	16040.2	1	O-SINAPOYLCHOLINE [ C16 H24 N O5, tgt= ]			(292.1504, 1133.32)(330.2022, 2350.96)
10,16-dihydroxypalmitate	48123.1	1	1	1	9--OR-1016-DIHYDROXYPALMITATE [ C16H31O4, tgt= ]			(292.1955, 19710.5)(293.1981, 284.46)
16-oxo-palmitate / 3-oxo-palmitate	48770.1	1	1	1	CPD-10512 [ C16H29O3, tgt= ]			(292.1955, 19710.5)(293.1981, 284.46)(274.1852, 268.67)
glutathione	127065	68495.6	63696.8	80106.5	GLUTATHIONE [ C10 H16 N3 O6 S, tgt=47.62, overall=47.62 ]			(292.811, 25864.266)(294.06418, 1839.6188)(334.91202, 1226.9205)(307.07593, 6377.9595)(308.08624, 1476.175)
trichloroethanol glucoside	36295.4	78460.9	95657.2	78572.4	CPD-9676 [ C8 H13 Cl3 O6, tgt= ]			(292.9731, 5374.6924)(293.9739, 1139.7563)(320.98016, 692.80664)(316.9919, 573.1933)
&alpha;,&omega;-9<i>Z</i>-octadecenedioate	476292	510887	459609	967817	OCTADEC-9-ENE-118-DIOIC-ACID [ C18 H30 O4, tgt=46.94, overall=46.94 ]			(293.1403, 7593.4653)(294.21, 701.11)(311.218, 1699.1162)(293.208, 20427.484)(294.21115, 2903.9102)(295.2232, 129.98)(328.2451, 11831.294)(329.24792, 1278.124)(333.20004, 16303.566)(334.2035, 1660.8636)(335.2137, 231.09)(315.18954, 8487.176)(316.1936, 1342.88)
(12Z,15Z)-9,10-dihydroxyoctadeca-12,15-dienoate / (13<i>S</i>)-HPODE / (9<i>S</i>)-HPODE / (9Z,12Z)-15,16-dihydroxyoctadeca-9,12-dienoate / (9Z,15Z)-12,13-dihydroxyoctadeca-9,15-dienoate / 9,10-12,13-diepoxyoctadecanoate	513845	1.81353e+06	528675	1	CPD-13094 [ C18 H31 O4, tgt=46.54, overall=46.54 ]			(293.20746, 11651.249)(294.21097, 1420.8535)(311.25424, 40535.37)(312.25726, 6433.828)(338.42462, 617.412)(317.03647, 1262.4166)
9-hydroxy-10-oxo-12-octadecenoate	513845	1.81353e+06	528675	1.28248e+06	CPD-8683 [ C18 H31 O4, tgt=46.54, overall=46.54 ]			(293.2078, 13691.643)(294.21124, 1638.1201)(295.22302, 148.1)(311.25424, 40535.37)(312.25726, 6433.828)(338.42462, 617.412)(316.82578, 1218.935)
(9Z,15Z)-12,13-epoxy-octadeca-9,15-dienoate	1.07945e+06	1.17964e+06	1.05191e+06	1.98883e+06	CPD-13090 [ C18 H29 O3, tgt=71.28, overall=71.28 ]			(293.20786, 13121.364)(294.21133, 2269.4946)(275.1979, 32857.613)(276.19974, 7109.5723)(277.1964, 225.555)(295.22293, 959.95715)(277.21292, 8815.805)(278.21625, 1430.918)(311.254, 61735.71)(312.2572, 10272.22)(313.266, 1579.66)(317.20627, 3856.5977)(318.2103, 206.145)
terbinafine	210337	217847	272780	416639	CPD-10571 [ C21 H26 N, tgt=58.01, overall=58.01 ]			(293.20804, 18278.295)(294.211, 1934.5104)
(12Z,15Z)-9,10-epoxyoctadeca-12,15-dienoate / (9Z)-(13S)-12,13-epoxyoctadeca-9,11-dienoate / (9Z,12Z)-15,16-epoxyoctadeca-9,12-dienoate / 8-[(1R,2R)-3-oxo-2-{(Z)-pent-2-enyl}cyclopentyl]octanoate /9(S)-hydroxy-(10E,12Z,15Z)-octadeca-10,12,15-trienoate / 9,10-epoxy-10,12Z-octadecadienoate /colneleate / etheroleate	182355	192606	302666	1.98883e+06	CPD-13089 [ C18 H29 O3, tgt=71.28, overall=71.28 ]			(293.20834, 19475.979)(294.21164, 2563.0024)(275.19843, 38143.797)(276.19968, 12886.543)(277.1964, 225.555)(277.21313, 10469.189)(278.21625, 1430.918)(311.254, 61735.71)(312.2572, 10272.22)(313.266, 1579.66)(317.20502, 1254.5819)
5'-(aminoiminomethyl)amino-5'-deoxyadenosine	124066	166792	125081	24413	CPD0-1401 [ C11 H17 N8 O3, tgt=47.76, overall=47.76 ]			(294.1506, 1189.2008)(332.12997, 10435.933)(333.13278, 670.36554)
16-hydroxypalmitate	89128.8	107764	58402.9	265549	16-HYDROXYPALMITATE [ C16 H31 O3, tgt=4.76, overall=4.76 ]			(294.21133, 4183.27)(276.20047, 6461.7905)(277.1964, 250.45499)
littorine	156785	271870	202039	1.53223e+06	CPD-7996 [ C17 H24 N O3, tgt=47.59, overall=47.59 ]			(294.94604, 8813.263)(292.1611, 22055.979)(291.97995, 7475.6113)(293.2064, 534.614)(313.17346, 1696.0562)
licodione	12056.8	1	1	1	LICODIONE [ C15 H11 O5, tgt= ]			(295.0598, 3050.99)(296.0635, 28570.34)(297.0656, 2092.94)(298.062, 1734.07)
EDTA	132226	61764.2	21606.2	1	EDTA [ C10 H14 N2 O8, tgt=1.64, overall=1.64 ]			(295.09885, 7222.4785)(291.09412, 9705.849)
(+)-catechin / (2<i>R</i>,3<i>S</i>,4<i>S</i>)-leucopelargonidin / luteoforol	132226	61764.2	21606.2	1	CPD-1961 [ C15 H14 O6, tgt=0.58, overall=0.58 ]			(295.09885, 7222.4785)(291.4582, 9594.592)
(-)-epicatechin	132226	61764.2	86751.6	47273.9	CPD-7630 [ C15 H14 O6, tgt=0.58, overall=0.58 ]			(295.09915, 7319.7456)(292.03424, 8644.918)(296.06223, 577.2267)
&beta;-<i>D</i>-apiofuranosyl-(1->6)-<i>D</i>-glucose /5'-(dimethylsulfonio)-5'-deoxyadenosine / primeverose / vicianose	11350000	10987500	11762500	11287500	CPD-9004 [ C11 H20 O10, tgt=82.27, overall=82.27 ]			(295.10016, 270285.94)(296.10263, 26044.66)(297.10397, 3390.5876)
7,8-dihydropteroate / dihydroisopteroate / N-methylanthraniloyl-&beta;-<i>D</i>-glucopyranose	12375000	11962500	12837500	12287500	7-8-DIHYDROPTEROATE [ C14 H13 N6 O3, tgt=41.77, overall=41.77 ]			(295.10016, 271498.06)(296.10263, 26175.654)(297.10397, 3408.4412)
indican	9.3375e+06	11950000	12750000	12250000	INDICAN [ C14 H17 N O6, tgt=45.29, overall=45.29 ]			(295.10016, 271780.56)(296.10263, 26196.088)(297.10397, 3426.0574)(277.09036, 135.51625)
(<i>R</i>)-prunasin	1	1	1	12250000	CPD-553 [ C14H17NO6, tgt= ]			(295.1011, 267875.0)(296.1036, 25453.85)(297.10492, 3396.9163)(277.0909, 135.64)
1-phenyl-7-(3,4-dihydroxyphenyl)-hepta-1,3-dien-5-one	398975	960741	899658	1.96886e+06	CPD-12202 [ C19 H18 O3, tgt=51.69, overall=51.69 ]			(295.13434, 6564.131)(296.1289, 4484.0303)(295.13614, 1504.9026)(312.1583, 39573.55)(313.15576, 10168.126)(298.16055, 2157.8)(317.11658, 4760.746)(299.09592, 4934.7505)(300.09155, 3428.1775)
(6-hydroxy-indol-3-yl)acetyl-L-valine / oxindole-3-acetyl-L-valine	42807.8	1	38776.2	1	CPD-9583 [ C15 H17 N2 O4, tgt=20.62, overall=20.62 ]			(295.13547, 1267.1666)(312.16214, 6438.6187)(317.11673, 5350.138)
<i>N</i>-vanillate-L-glutamate	11350000	9.79348e+06	8.25284e+06	1.73544e+06	CPD-11845 [ C13 H13 N O7, tgt=44.88, overall=44.88 ]			(295.14444, 5328.2866)(297.0662, 3080.81)(277.066, 314.9)(295.0998, 273311.84)(296.1023, 26471.879)(297.10355, 3417.8171)(323.0706, 1597.0133)(300.04626, 47945.88)
trimethoprim	1	1	70111.8	1	CPD0-1581 [ C14 H18 N4 O3, tgt= ]			(295.1619, 1225.2124)(308.17566, 8006.5825)
10-deoxysarpagine / norajmaline	1	132961	1	1	10-DEOXYSARPAGINE [ C19 H22 N2 O, tgt= ]			(295.16943, 14345.393)(296.17252, 1041.5225)
corynantheal	1	132961	53835.1	1	CPD-9851 [ C19 H22 N2 O, tgt= ]			(295.16943, 14345.393)(296.17252, 1041.5225)(276.1562, 11795.891)(278.17114, 324.87)
5,8,11,14-icosatetraynoate	1	142722	32951.4	1	CPD-14769 [ C20 H23 O2, tgt= ]			(295.16943, 14609.73)(296.17252, 1078.1875)(280.66162, 3271.8901)(296.1817, 12378.35)(316.2132, 1053.01)
1-<i>O</i>-malyl-&beta;-<i>D</i>-glucose	1.65989e+06	1.08332e+06	1.99864e+06	1.28025e+06	CPD-15286 [ C10 H15 O10, tgt=47.01, overall=47.01 ]			(295.2033, 7460.6787)(297.06583, 2755.435)(296.0653, 40822.504)(297.06723, 2651.9033)(298.06357, 2284.3633)(323.06934, 1833.7361)(300.04535, 48215.188)
(9Z)-12,13-dihydroxyoctadeca-9-enoate / 9,10-epoxy-18-hydroxystearate	626762	707555	763492	617570	CPD-13086 [ C18 H33 O4, tgt=44.56, overall=44.56 ]			(295.22336, 7696.5347)(296.2268, 759.63495)(297.2366, 110.65)(334.2826, 6671.6304)(336.2832, 142.99)(313.26947, 8202.529)(314.273, 555.68884)(318.20822, 472.09506)
(<i>S</i>)-atropine	92252.4	271870	106315	1	L-HYOSCYAMINE [ C17 H24 N O3, tgt=47.59, overall=47.59 ]			(295.28735, 9208.306)(291.93484, 8478.078)(291.70898, 3297.6401)(313.17346, 559.4117)
(<i>E</i>)-1-(L-cystein-<i>S</i>-yl)-<i>N</i>-hydroxy-&omega;-(methylsulfanyl)heptan-1-imine	7.9714e+06	4.09589e+06	4.66026e+06	11137500	CPDQT-408 [ C11 H22 N2 O3 S2, tgt=59.57, overall=59.57 ]			(295.72263, 121327.08)(296.72424, 12560.397)(297.10495, 3330.108)(277.09125, 162.11)
(+)-pisatin	750233	670014	1.13382e+06	902635	CPD-3944 [ C17 H14 O6, tgt=47.57, overall=47.57 ]			(296.06384, 55726.0)(297.06577, 3872.3977)(298.06223, 3207.8398)(337.05994, 2510.9824)(323.0693, 2418.3848)
1,7-dihydroxy-6,8-dimethoxy-2-methylanthraquinone /2',7-dihydroxy-4',5'-dimethoxyisoflavone / 3,4'-dimethylkaempferol / 7,4'-dimethylkaempferol / cirsimaritin / ladanein / robustaquinone B	750233	670014	1.13382e+06	902635	CPD-9629 [ C17 H14 O6, tgt=47.57, overall=47.57 ]			(296.06384, 55726.0)(297.06577, 3872.3977)(298.06223, 3207.8398)(337.05994, 2510.9824)(323.0693, 2418.3848)
7,2'-dihydroxy-4'-methoxy-isoflavanol carbocation intermediate 2	1.04583e+06	1.009e+06	1.08137e+06	1.01889e+06	CPD-4283 [ C16 H19 O5, tgt=75.10, overall=75.10 ]			(296.10263, 26990.307)(297.10397, 3531.537)
4-coumaryl-4-coumarate / 7,8-dihydropteroate	1.18222e+06	1.13041e+06	1.22942e+06	1.15499e+06	CPD-17610 [ C18 H16 O4, tgt=59.63, overall=59.63 ]			(296.10263, 27438.604)(297.10397, 3601.1853)
5-amino-1-(5-phospho-&beta;-D-ribosyl)imidazole	207277	127347	25904.8	62385	5-PHOSPHORIBOSYL-5-AMINOIMIDAZOLE [ C8 H13 N3 O7 P, tgt=3.05, overall=3.05 ]			(296.1319, 2378.7693)(297.72922, 2738.0867)(298.06113, 1519.3434)(294.0642, 4140.9067)(295.06033, 3351.0266)(302.71048, 4874.294)(303.0428, 3107.804)
cinchonidine	57381.8	459847	209300	220969	CPD-9835 [ C19 H23 N2 O, tgt= ]			(296.18192, 12991.79)(297.684, 613.04)(298.1835, 1852.1201)(296.19202, 20247.996)(297.1998, 3495.0967)(316.21753, 1516.6998)(296.19897, 30551.885)(297.2018, 4641.5425)(298.214, 297.55)
cinchonine	1	459847	36176.9	188475	CPD-9847 [ C19 H23 N2 O, tgt= ]			(296.19498, 23280.393)(297.1998, 3495.0967)(316.2198, 2134.14)(296.1991, 27624.277)(297.2019, 4370.4097)
(<i>R</i>)-4'-phosphopantothenate	388249	402015	437870	383012	4-P-PANTOTHENATE [ C9 H15 N O8 P, tgt=45.75, overall=45.75 ]			(297.06427, 1677.0449)(298.061, 1277.63)(297.0658, 3502.54)(298.0623, 2732.67)(314.0883, 16086.314)(315.09073, 2190.3289)(322.05118, 4274.46)(302.3768, 5574.9634)(303.04297, 2350.22)
2,5-dihydroxybenzoate 2-O-&beta;-D-glucoside / 2,5-dihydroxybenzoate 5-O-&beta;-D-glucoside	87410.1	47916.4	125948	85182.4	CPD-12663 [ C13 H15 O9, tgt=36.88, overall=36.88 ]			(297.06586, 4844.2964)(298.0622, 4016.5857)(303.0801, 7534.5146)(315.091, 4637.72)(323.0675, 4074.4)
(-)-epiafzelechin / (+)-afzelechin / (3R,4R)-7,2',4'-trihydroxyisoflavanol / apiforol / phloretin	1	1	38568.5	1	CPD-10413 [ C15 H14 O5, tgt= ]			(297.0659, 6599.0576)(298.0622, 5373.975)
uniconazole-P	5.6928e+06	3.92769e+06	4.72122e+06	3.50917e+06	CPD-7770 [ C15 H18 Cl N3 O, tgt=34.99, overall=34.99 ]			(298.0945, 184647.56)(299.09637, 20863.744)(300.09174, 6249.433)
3-methylxanthosine	6.31854e+06	4.34767e+06	5.23479e+06	3.87838e+06	CPD-19520 [ C11 H14 N4 O6, tgt=65.90, overall=65.90 ]			(298.0945, 186431.77)(299.09637, 21085.59)(300.09174, 6322.1484)(317.1184, 235.97)(325.0989, 508.15707)
geranyl &beta;-<i>D</i>-glucopyranoside	577592	333085	373134	676633	CPD-18262 [ C16 H28 O6, tgt=47.61, overall=47.61 ]			(298.18344, 3694.9866)(337.23047, 1613.5237)(316.50467, 23162.297)(317.31705, 3058.2502)
phytol	925854	933349	927964	871960	PHYTOL [ C20 H40 O, tgt=35.07, overall=35.07 ]			(298.30707, 2547.141)(314.33817, 18327.756)(315.34122, 2129.0854)
2-<i>S</i>-cysteinyldopaquinone / 5-<i>S</i>-cysteinyldopaquinone	288875	130510	283494	1	CPD-20261 [ C12 H14 N2 O6 S, tgt=30.06, overall=30.06 ]			(299.04333, 38334.77)(300.04428, 12153.707)(301.04214, 11141.269)(302.04337, 2405.112)(298.0616, 1319.8354)(299.04422, 39394.38)(333.09006, 993.425)(314.08804, 21512.254)(315.0908, 1934.8815)(340.1611, 723.9055)(341.03946, 506.50668)
<i>N</i><sup>2</sup>-formyl-<i>N</i><sup>1</sup>-(5-phospho-&beta;-D-ribosyl)glycinamide	38192	10030.5	1	1	5-P-RIBOSYL-N-FORMYLGLYCINEAMIDE [ C8 H13 N2 O9 P, tgt=41.92, overall=41.92 ]			(299.04376, 251196.0)(300.04477, 81050.266)(317.0161, 5601.496)(318.0174, 1113.1475)
<i>trans</i>-coutarate / phaselate	167250	76042.1	52819.4	14739.5	CPD-16578 [ C13 H10 O8, tgt=49.32, overall=49.32 ]			(299.04404, 170923.27)(277.02988, 2203.6416)(298.06113, 1847.934)(277.029, 2028.05)(294.197, 4957.78)(295.1934, 2242.5186)(298.0632, 2006.94)(317.0173, 4566.63)(318.0177, 944.86)(301.01434, 1277.9006)
disulfiram	3510485	3.14543e+06	3.92034e+06	3444103	DISULFIRAM [ C10 H20 N2 S4, tgt=59.34, overall=59.34 ]			(299.0445, 166676.8)(300.0455, 53773.848)(301.04352, 49096.348)(302.04462, 8957.501)(303.04398, 3033.5227)(297.0658, 3109.3127)(298.06223, 2544.372)
rhamnetin	2.857e+06	2.55856e+06	2.88356e+06	2.64126e+06	CPD-13511 [ C16 H12 O7, tgt=13.46, overall=13.46 ]			(299.04453, 207551.8)(300.04556, 66963.766)
2'-hydroxypseudobaptigenin	2866522	2.57017e+06	2.8906e+06	2.68936e+06	CPD-3629 [ C16 H10 O6, tgt=13.46, overall=13.46 ]			(299.04453, 207551.8)(300.04556, 66963.766)(298.06293, 1791.6976)
<i>N</i>-acetyl-&alpha;-D-galactosamine 1-phosphate / <i>N</i>-acetyl-&alpha;-D-glucosamine 1-phosphate	4.13184e+06	3.62035e+06	3.96351e+06	3.75885e+06	CPD-7246 [ C8 H14 N O9 P, tgt=21.06, overall=21.06 ]			(299.04453, 210006.75)(300.04556, 67749.84)(282.02847, 15896.316)(283.02942, 4895.122)(284.02884, 4813.907)
7-hydroxy-4'5'-dimethoxyisoflavone / afrormosin / apigenin-7,4'-dimethyl ether	6.31854e+06	4.34767e+06	5.23411e+06	3.87838e+06	CPD-9530 [ C17 H14 O5, tgt=34.76, overall=34.76 ]			(299.09555, 18716.549)(300.0909, 5523.4907)(299.09665, 21748.922)(300.09198, 6545.773)(317.117, 320.238)
3-[(7'-methylsulfanyl)heptyl]malate	1	153481	129818	1	CPDQT-40 [ C12 H20 O5 S, tgt=45.06, overall=45.06 ]			(299.0956, 20894.479)(300.09097, 6383.6377)
7-methylxanthosine	745004	467858	575620	528018	7-METHYLXANTHOSINE [ C11 H15 N4 O6, tgt=27.06, overall=27.06 ]			(299.09637, 20649.316)(300.09174, 6215.6357)(304.01624, 1438.8036)(304.13577, 1940.0367)(325.09885, 559.67)
anthraniloyl-<i>O</i>-glucopyranose / p-aminobenzoate-&beta;-D-glucopyranosyl ester	625748	445274	513569	428004	CPD-12835 [ C13 H17 N O7, tgt=51.25, overall=51.25 ]			(299.09637, 21891.213)(300.09174, 6584.5884)(304.05615, 1555.2236)(304.1355, 2077.85)(325.09885, 561.865)
<i>all-trans</i>-retinoate / dehydroabietate	363720	606315	759225	667645	RETINOATE [ C20 H27 O2, tgt=45.95, overall=45.95 ]			(300.213, 1630.0701)(282.20352, 18644.379)(283.2066, 2018.6816)(304.10086, 1724.9523)(324.5923, 1598.386)(305.18256, 3531.1472)(306.18484, 530.125)
(+)-dihydromyricetin	842007	940817	920764	976082	CPD-7087 [ C15 H11 O8, tgt=28.06, overall=28.06 ]			(301.0428, 56615.527)(302.04385, 10381.203)(323.06873, 2029.2025)(302.0454, 10351.743)(337.08588, 700.07263)(323.07065, 1727.7277)
7-methylinosine	732361	672952	566510	613079	CPD0-1040 [ C11 H15 N4 O5, tgt=85.39, overall=85.39 ]			(301.13797, 24021.643)(302.141, 2410.343)
hemanthamine	806789	736096	625774	669724	CPD-19429 [ C17 H19 N O4, tgt=31.64, overall=31.64 ]			(301.13797, 24577.56)(302.141, 2485.7969)
(-)-9&beta;-pimara-7,15-dien-19-oate / <i>ent</i>-kaur-16-en-19-oate /abieta-7,13-diene-18-oate / isopimarate / kauralexin B1 / levopimaric acid / neoabietic acid / palustric acid	64324.2	79855.1	1	39955.9	CPD-13923 [ C20 H29 O2, tgt=20.83, overall=20.83 ]			(301.21262, 2305.0864)(283.2028, 4314.7715)(302.22955, 4335.3027)(284.21976, 1972.3501)(309.20282, 243.285)
8-hydroxykaempferol / 8-hydroxy-luteolin / bracteatin /delphinidin / quercetin / tricetin	1.16464e+06	1.01213e+06	1.11301e+06	1.07655e+06	CPD-14867 [ C15 H9 O7, tgt=32.50, overall=32.50 ]			(301.40726, 43321.848)(302.40765, 8589.706)(283.02942, 4956.841)(302.04565, 11328.482)(284.0274, 4641.021)(285.0282, 699.9346)(323.0705, 1097.7128)
(5Z,8Z,11Z,14Z,17Z)-icosapentaenoate	117326	109986	22066.1	39955.9	5Z8Z11Z14Z17Z-EICOSAPENTAENOATE [ C20 H29 O2, tgt=20.83, overall=20.83 ]			(301.72025, 3572.8835)(283.2028, 4314.7715)(302.22943, 4363.0845)(284.2187, 2205.1006)(309.20282, 243.285)
oryzalide A	34930.6	35565.1	221256	1	CPD-16665 [ C19 H28 O4, tgt= ]			(302.1925, 19858.559)(303.19553, 1144.6375)(303.19122, 6623.6978)(339.227, 998.51)(324.2297, 239.29)
<i>ent</i>-3&beta;-hydroxycassa-12,15-dien-2-one / <i>ent</i>-3&beta;-hydroxy-cassa-12,15-diene-11-one / 11-hydroxyferruginol / 9&beta;-stemod-13(17)-en-19-oate / dehydroabietadiene-diol / oryzalexin A / oryzalexin B	73192	30132	22066.1	39955.9	CPD-20325 [ C20 H30 O2, tgt=10.15, overall=10.15 ]			(302.22845, 4613.5415)(284.2187, 2218.4568)
robustaquinone F	4.81447e+06	5.04393e+06	4.48197e+06	4.79104e+06	CPD-9620 [ C15 H10 O7, tgt=82.88, overall=82.88 ]			(303.04773, 248559.4)(304.0503, 32523.13)(305.05194, 3395.443)(287.05182, 1578.3263)
BAS 110	1.02454e+07	1.07292e+07	9.53749e+06	1.01895e+07	CPD-4023 [ C12 H13 Cl2 N3 O2, tgt=70.83, overall=70.83 ]			(303.04773, 248852.69)(304.0503, 32560.314)(305.05194, 3400.0999)
<i>N-P</i>-tosyl-L-lysinechloromethyl ketone	1	1	1	12850.2	CPD-6302 [ C14H20ClNO3S, tgt= ]			(303.0818, 7200.05)(307.0784, 2207.27)
chrysoeriol / kaempferide /pratensein	1	1	1	12850.2	574-TRIHYDROXY-3-METHOXYFLAVONE [ C16 H11 O6, tgt= ]			(303.0818, 7200.05)(322.0523, 5962.72)
2,4-diamino-6-methyl-5,3'-(3-nitrophenoxy)prop-1'-yloxypyrimidine	781349	353030	1.12083e+06	852058	CPD0-1586 [ C14 H19 N5 O4, tgt=29.28, overall=29.28 ]			(303.13818, 31028.465)(304.1414, 2588.6724)(344.1304, 16862.518)(345.13068, 1684.0314)(322.1608, 1961.5801)
(<i>S</i>)-6-<i>O</i>-methylnorlaudanosoline	629988	688127	555151	563085	6-O-METHYLNORLAUDANOSOLINE [ C17 H20 N O4, tgt=38.53, overall=38.53 ]			(303.1383, 32221.002)(304.14148, 2696.8489)
L-nicotianamine	570013	541353	671159	602291	CPD-463 [ C12 H21 N3 O6, tgt=43.42, overall=43.42 ]			(303.1384, 31989.572)(304.14157, 2648.3003)
scopolamine	387535	387694	583662	602291	SCOPOLAMINE [ C17 H21 N O4, tgt=21.22, overall=21.22 ]			(303.13864, 32507.27)(304.1418, 2696.964)(321.188, 20642.94)(322.1908, 2062.435)(307.17252, 5034.265)
carlactone	56480.9	368259	498921	552664	CPD-14649 [ C19 H26 O3, tgt=26.30, overall=26.30 ]			(303.1922, 6084.24)(307.2238, 1381.05)(326.18936, 969.124)(307.1735, 25956.34)(308.1763, 3214.6245)
dTMP	4.81447e+06	5.04393e+06	2.79619e+06	4.79104e+06	TMP [ C10 H13 N2 O8 P, tgt=38.52, overall=38.52 ]			(304.04883, 36270.586)(304.90793, 8398.196)(305.0508, 3963.3)(325.05447, 5957.945)(323.0708, 1001.51337)
cytidine 2',3'-cyclic monophosphate	695653	727495	633712	674891	CPD-3713 [ C9 H11 N3 O7 P, tgt=35.79, overall=35.79 ]			(304.0503, 33546.953)(305.05194, 3543.608)
4-(&beta;-D-glucosyloxy)benzoate / salicylate 2-O-&beta;-D-glucoside	623482	652266	576371	613248	CPD-453 [ C13 H15 O8, tgt=31.45, overall=31.45 ]			(304.0503, 33601.86)(305.05194, 3527.706)
(2<i>R</i>,3<i>S</i>,4<i>S</i>)-leucodelphinidin	692591	719320	634085	675725	CPD-7088 [ C15 H14 O8, tgt=21.62, overall=21.62 ]			(304.0503, 34230.133)(305.05194, 3609.5254)
8-anilinonaphthalenesulfonate	675665	39777.1	1.55281e+06	22536.2	CPD-13245 [ C16H12NO3S, tgt= ]			(304.051, 1439.9199)(287.0521, 2513.641)(325.05377, 5145.302)
(indol-3-yl)acetyl-L-phenylalanine	1	1	211892	1	CPD-9582 [ C19 H17 N2 O3, tgt= ]			(305.1135, 278.48)(340.1558, 5898.8677)(323.15607, 480.3975)
3-epihydroxy-2'-deoxymugineate / mugineate	118735	129363	108364	95197.2	CPD-7291 [ C12 H18 N2 O8, tgt=34.70, overall=34.70 ]			(305.11438, 318.08002)(340.1561, 6498.7163)(319.1117, 7471.4155)
2'-deoxymugineate	772084	717918	669593	562762	CPD-7227 [ C12 H19 N2 O7, tgt=43.42, overall=43.42 ]			(305.1153, 259.93)(290.11996, 772.16504)(322.16077, 1968.6815)(303.13828, 32366.027)(304.14148, 2705.349)
(indol-3-yl)acetyl-L-glutamine	3.43451e+06	2.10169e+06	539919	1.28718e+06	INDOLE-3-ACETYL-GLN [ C15 H16 N3 O4, tgt=31.03, overall=31.03 ]			(305.1199, 5228.512)(320.15073, 7602.4463)(325.1096, 82275.56)(326.11227, 8497.247)
lupinate	1	23488.9	87111.2	107394	CPD-669 [ C13 H18 N6 O3, tgt= ]			(306.16702, 12190.09)(307.17047, 1524.8801)(311.12546, 2470.58)
(-)-epigallocatechin / (+)-gallocatechin / (2<i>R</i>,3<i>S</i>,4<i>S</i>)-leucocyanidin	106867	73558.2	86582.9	97749	CPD-10411 [ C15 H14 O7, tgt=41.31, overall=41.31 ]			(307.07568, 5830.6616)(309.28317, 1040.084)(311.07837, 260.95502)(307.0769, 5223.482)(308.0862, 1161.47)(291.08102, 2624.989)(329.85712, 1138.554)
(indol-3-yl)acetyl-L-glutamate	12910.1	1	45214.2	1	INDOLE-3-ACETYL-GLU [ C15 H14 N2 O5, tgt= ]			(307.07596, 7449.78)(308.08615, 1717.6432)
2-O-(&beta;-<i>D</i>-glucosyl)-2-hydroxycinnamate	2.21346e+06	2774343	1.72077e+06	1.83126e+06	CPD-459 [ C15 H17 O8, tgt=32.36, overall=32.36 ]			(307.0764, 6053.217)(308.08606, 1228.34)(308.08728, 20014.848)(309.09003, 2547.27)(310.0861, 656.545)(325.10965, 82370.125)(326.11234, 8534.805)(349.08218, 1502.1719)(351.0998, 1843.2)
guanosine	398399	524229	486834	431498	GUANOSINE [ C10 H13 N5 O5, tgt=60.98, overall=60.98 ]			(307.07767, 1291.7308)(308.08673, 1788.615)(267.0949, 3246.7063)(270.1052, 11505.977)(284.0957, 26205.16)(285.098, 1479.72)(291.08096, 3184.1414)
feruloylagmatine	1.46581e+06	1.80421e+06	1.71168e+06	1.81843e+06	CPD-12236 [ C15 H23 N4 O3, tgt=54.88, overall=54.88 ]			(307.1732, 42316.355)(308.1759, 5972.488)(325.209, 1820.03)(312.15265, 82535.445)(313.15506, 10350.585)
(6S)-hydroxyhyoscyamine	1.06585e+06	477959	621878	322952	CPD-2202 [ C17H24NO4, tgt= ]			(307.17337, 34995.543)(308.17612, 4365.919)(309.17847, 204.83499)(289.16156, 821.6933)(307.17267, 12076.63)(325.20776, 2861.585)
decylglucoside	617986	193169	863837	1	CPD-13471 [ C16 H32 O6, tgt=47.36, overall=47.36 ]			(307.22177, 142.14499)(324.23138, 253.18)(320.25125, 352.29666)
pseudouridine 5'-phosphate / UMP / uridine 2'-monophosphate / uridine 3'-monophosphate	1	1	1	12850.2	PSEUDOURIDINE-5-P [ C9 H11 N2 O9 P, tgt= ]			(308.0198, 1790.11)(322.0523, 5962.72)(349.0215, 3166.52)
1-<i>O</i>-(4-coumaroyl)-&beta;-D-glucose	344041	1	481590	222672	CPD-8674 [ C15 H18 O8, tgt= ]			(308.08728, 23272.17)(309.09003, 2847.53)(310.0861, 733.82996)(332.12988, 11756.829)(344.13034, 18629.717)(345.13068, 1831.5614)(349.08368, 1985.5995)(333.09006, 1130.05)
(-)-jasmonoyl-L-valine	378742	779684	137456	1	CPD-11233 [ C17 H26 N O4, tgt=0.63, overall=0.63 ]			(309.20215, 1351.71)(291.33408, 6514.388)(309.204, 360.33)(331.18356, 3166.9587)(332.1871, 153.8)(313.17294, 3306.0825)
(9Z,11E,14Z)-(13S)-hydroperoxyoctadeca-(9,11,14)-trienoate / 13(S)-HPOTE / 9(<i>S</i>)-HPOTE	1.92707e+06	1.72794e+06	2.95001e+06	2.49719e+06	CPD-59 [ C18 H29 O4, tgt=57.88, overall=57.88 ]			(309.20242, 497.02997)(291.193, 75328.43)(292.19577, 11380.244)(293.20526, 879.28375)(333.0547, 691.25287)
ajmaline	127948	78256.5	138336	186594	CPD-14751 [ C20 H26 N2 O2, tgt=5.10, overall=5.10 ]			(309.20288, 1516.5912)(344.2264, 5405.5547)(331.18414, 2884.7322)(332.1871, 326.83)
2-(2,8-dihydroxytridecyl)-6-oxopyran-4-olate	1.94121e+06	2.25088e+06	1.53079e+06	468782	CPD-17646 [ C18 H29 O5, tgt=48.44, overall=48.44 ]			(309.2036, 1357.33)(332.0479, 2189.3928)(325.23398, 147899.36)(326.23657, 24759.701)(327.23923, 1937.8463)
(-)-9&beta;-pimara-7,15-dien-19-al / <i>ent</i>-cassa-12,15-dien-2-one / <i>ent</i>-kaurenal /9&beta;-stemod-13(17)-en-19-al / abieta-7,13-diene-18-al / dehydroabietadienol / ferruginol / isopimara-7,15-dienal /levopimaradienal / neoabietadienal / palustradienal	138389	180131	198156	231161	CPD-13922 [ C20 H30 O, tgt=58.43, overall=58.43 ]			(309.21848, 8034.521)(294.83563, 11734.345)(295.93182, 8246.561)(296.2274, 2723.668)
gibberellin A<sub>5</sub>	53299.9	1	38414.8	1	CPD-15217 [ C19 H21 O5, tgt=36.40, overall=36.40 ]			(311.1201, 4765.21)(333.14716, 1286.0426)
gibberellin A<sub>7</sub>	108302	82870.4	164159	132701	CPD-6975 [ C19 H21 O5, tgt=36.40, overall=36.40 ]			(311.12228, 8345.083)(353.13245, 344.345)(317.15283, 285.05)(347.1637, 8738.592)(348.16772, 378.26602)(333.14716, 1286.0426)(329.15417, 3520.6467)
gibberellin A<sub>51</sub>-catabolite	3.70889e+06	1.43237e+07	1.25798e+07	1.68375e+07	CPD-498 [ C19 H20 O5, tgt=44.49, overall=44.49 ]			(311.12424, 7951.633)(315.13016, 4166.5713)(328.148, 581354.7)(329.15042, 82238.484)(330.15182, 9394.514)
cinnamoylserotonin	75936.8	79045.2	201026	114000	CPD-8937 [ C19 H18 N2 O2, tgt=2.31, overall=2.31 ]			(311.14203, 1107.507)(328.1849, 695.3)(306.1664, 11174.212)(307.17035, 1047.244)(311.1239, 2882.54)
2-<i>R</i>-hydroperoxy-linolenate	194295	1	79426.5	219918	CPDQT-458 [ C18 H30 O4, tgt=46.94, overall=46.94 ]			(311.2191, 2460.6467)(293.2084, 21830.33)(294.2117, 3161.0066)(315.18927, 6306.38)
(-)-9&beta;-pimara-7,15-dien-19-ol /<i>ent</i>-11&beta;-hydroxy-<i>ent</i>-cassa-12,15-diene /<i>ent</i>-cassa-12,15-dien-2&beta;-ol / <i>ent</i>-cassa-12,15-dien-3&beta;-ol / <i>ent</i>-isokauren-2&alpha;-ol / <i>ent</i>-isokauren-2&beta;-ol / <i>ent</i>-kaurenol / <i>ent</i>-sandaracopimaradien-3&beta;-ol / 2-methyl-6-farnesyl-1,4-benzoquinol /5-pentadecatrienyl resorcinol-3-methyl ether/ 6&bet…	169468	258853	319132	274090	CPD-13921 [ C20 H32 O, tgt=56.42, overall=56.42 ]			(311.23398, 12858.273)(312.23676, 704.9814)
(7Z,10Z,13Z,16Z,19Z)-docosa-7,10,13,16,19-pentenoate	97738.9	274631	76946.4	290870	CPD-13792 [ C22 H33 O2, tgt=30.71, overall=30.71 ]			(311.2342, 13396.675)(312.23703, 810.7756)
picrocrocin	2.46955e+06	2.31574e+06	1512063	2.19743e+06	CPD-8668 [ C16 H26 O7, tgt=43.74, overall=43.74 ]			(312.15268, 85751.83)(313.15506, 10799.899)(331.1836, 5241.02)(313.1733, 2878.45)(333.1994, 283.05)
thebaine	1.35823e+06	1.54859e+06	2144827	2.19825e+06	CPD-7710 [ C19 H22 N O3, tgt=30.74, overall=30.74 ]			(312.15427, 71234.414)(313.15518, 10555.095)(298.83255, 1568.6066)(300.1764, 215.48)(338.73895, 2435.6914)(321.14108, 307.00665)
(S)-norlaudanine	1.3574e+06	1.54845e+06	1.79567e+06	1.42009e+06	CPD-15801 [ C19 H24 N O4, tgt=30.74, overall=30.74 ]			(312.15442, 69356.71)(313.15506, 10603.759)(348.1966, 2843.02)(338.5004, 2334.06)
(R)-reticuline	13650	38729.2	299145	1.42009e+06	R-RETICULINE [ C19 H24 N O4, tgt=30.74, overall=30.74 ]			(312.15668, 53966.53)(313.15573, 10571.245)(338.16647, 2809.665)
(<i>S</i>)-reticuline / salutaridinol	13650	38729.2	1	1.42009e+06	S-RETICULINE [ C19 H24 N O4, tgt=30.74, overall=30.74 ]			(312.15717, 50228.242)(313.15598, 10396.35)(338.16647, 2809.665)
gibberellin A<sub>15</sub> (closed lactone form)	55077.9	78997.4	76401	53661.8	CPD-6971 [ C20 H25 O4, tgt=41.13, overall=41.13 ]			(312.16196, 6237.7466)(312.16418, 6702.345)(338.1672, 4255.0015)
sphinganine (C20)	1.59761e+06	796471	623097	787215	CPD-13611 [ C20 H44 N O2, tgt=47.08, overall=47.08 ]			(312.32278, 29066.65)(313.3257, 5298.334)(314.33704, 1678.81)(353.323, 10962.43)(354.3257, 1389.5518)
(<i>E</i>)-1-(L-cysteinylglycin-<i>S</i>-yl)-<i>N</i>-hydroxy-&omega;-(methylsulfanyl)butan-1-imine	82595.1	70380.5	155793	94917.6	CPD-12391 [ C10 H19 N3 O4 S2, tgt= ]			(312.83817, 9334.374)(310.0861, 734.06)(293.0605, 7452.954)(296.06223, 603.88666)(314.08856, 9114.903)(315.0904, 1822.065)(336.29947, 2428.0325)(337.0595, 4987.69)
lesquerolate	158550	55508.5	127086	315999	CPD-12170 [ C20 H37 O3, tgt=80.69, overall=80.69 ]			(313.2935, 165.69)(345.319, 1202.8)(325.2924, 9573.856)(326.29633, 507.135)(348.26984, 12116.165)(349.2727, 660.255)(333.2613, 36891.727)(334.26425, 7971.018)
sanguinarine	329768	107111	500038	1	SANGUINARINE [ C20 H14 N O4, tgt=15.27, overall=15.27 ]			(314.08817, 18273.604)(315.09073, 1686.5737)(333.0899, 630.2)(337.0692, 1242.455)
labd-13-en-8&alpha;-,15 diol	924487	245971	789772	1.69159e+06	CPD-12746 [ C20 H38 O2, tgt=77.54, overall=77.54 ]			(315.09592, 3472.7402)(315.3095, 32662.705)(315.30795, 5336.2505)(316.31094, 519.48)(328.88947, 5881.2563)(329.92538, 1005.58594)
&beta;-nicotinate D-ribonucleotide	171580	183246	123732	125750	NICOTINATE_NUCLEOTIDE [ C11 H12 N O9 P, tgt=37.08, overall=37.08 ]			(315.1216, 8547.282)(316.06195, 1272.2751)(317.01434, 1284.59)(317.0161, 1580.5)(351.06473, 837.0119)(357.0181, 320.57)
momilactone A	357744	352529	297639	431808	CPD-7092 [ C20 H26 O3, tgt=50.08, overall=50.08 ]			(315.1896, 15210.778)(316.19284, 942.1238)
gondoate	4.26306e+06	1.72699e+06	2.36623e+06	5.08407e+06	CPD-12189 [ C20 H37 O2, tgt=42.06, overall=42.06 ]			(315.30814, 2670.3005)(327.30838, 45827.79)(328.3111, 6679.5654)(333.2621, 11340.891)
kauralexin B3	680252	619963	376786	770020	CPD-13544 [ C20 H27 O3, tgt=26.87, overall=26.87 ]			(315.65964, 26941.111)(316.66254, 2912.3687)(298.1834, 3959.4229)(316.20883, 24203.797)(317.21194, 2791.8992)(342.2069, 4338.565)(321.68906, 4070.585)
gibberellin A<sub>12</sub>-aldehyde	398128	365244	376786	576554	CPD1F-138 [ C20 H27 O3, tgt=26.87, overall=26.87 ]			(316.2081, 34802.65)(317.2109, 4316.095)(298.1834, 3959.4229)(316.20883, 24203.797)(317.21194, 2791.8992)(342.2069, 4338.565)(321.68906, 4070.585)
coronatine	1.20772e+06	275083	128752	564556	CPD-7081 [ C20 H29 N O2, tgt=30.69, overall=30.69 ]			(316.22247, 10872.986)(317.2261, 1252.4485)(333.26102, 31495.828)(334.26352, 4917.6743)
(8<i>E</i>)-4-hydroxy-sphing-8-enine	1.21053e+06	1.88746e+06	1.05129e+06	1.75157e+06	CPD-10693 [ C18 H38 N O3, tgt=53.81, overall=53.81 ]			(316.28168, 66060.93)(317.28433, 10159.573)(298.27014, 582.32996)
3-deoxy-D-<i>manno</i>-octulosonate 8-phosphate	166602	177172	113569	119939	KDO-8P [ C8 H12 O11 P, tgt=55.39, overall=55.39 ]			(316.48297, 2824.395)(317.1934, 2677.012)(318.46033, 608.28107)(319.01398, 719.54407)(301.01477, 1337.1588)(316.21027, 1271.7468)(317.0144, 1338.3)(301.0154, 1826.0022)
3&beta;-Hydroxy-9&beta;-pimara-7,15-diene-19,6&beta;-olide	218070	60022	322259	259786	CPD4KF-3 [ C20 H28 O3, tgt=59.72, overall=59.72 ]			(316.93417, 21124.328)(317.9373, 1887.2964)
4-methoxy-3-indolylmethyl glucosinolate aglycone	139394	128492	42991.9	97697.9	CPDQT-432 [ C11 H10 N2 O5 S2, tgt=24.21, overall=24.21 ]			(316.9931, 449.33)(317.01474, 1997.3502)(315.02185, 10344.76)(316.02383, 1329.364)(317.4335, 2958.924)(318.01755, 588.20166)(319.01492, 690.1875)(320.9806, 608.10834)
<i>S</i>-methyl-5'-thioinosine	5.74227e+06	4.17506e+06	4.83631e+06	3.50982e+06	5-METHYLTHIOINOSINE [ C11 H14 N4 O4 S, tgt=77.93, overall=77.93 ]			(317.11703, 408.53455)(298.0945, 183721.55)(299.09637, 20774.88)(300.09174, 6216.9927)
<i>S</i>-methyl-5'-thioadenosine	5.6928e+06	3.92769e+06	4.72122e+06	3.50917e+06	5-METHYLTHIOADENOSINE [ C11 H15 N5 O3 S, tgt=77.93, overall=77.93 ]			(317.1172, 324.58157)(298.09445, 210200.97)(299.09634, 23968.629)(300.09167, 7302.2188)
3&beta;-hydroxy-9&beta;-pimara-7,15-diene-19,6&beta;-olide	131395	60022	59800.1	259786	CPD-9905 [ C20H28O3, tgt= ]			(317.20642, 14772.682)(318.2097, 782.6887)
1-monopalmitoylethylene glycol	180229	220528	134403	285321	CPD0-1811 [ C18 H36 O3, tgt=31.00, overall=31.00 ]			(318.29678, 15050.708)(319.2998, 1318.9136)(323.25372, 7355.55)(324.2569, 313.695)(305.2427, 615.29)
phytosphingosine (C18)	72068.1	328394	91642.2	310976	PHYTOSPINGOSINE [ C18 H40 N O3, tgt=34.66, overall=34.66 ]			(318.29678, 16244.817)(319.29987, 1502.0156)
berberine	118735	129363	108364	95197.2	BERBERINE [ C20 H18 N O4, tgt=34.62, overall=34.62 ]			(319.11118, 6603.9097)(319.11194, 7200.6426)(340.1561, 6498.7163)(360.12485, 4154.084)
(2S)-hesperetin / 2,5,7-trihydroxy-4'-methoxyisoflavanone / homoeriodictyol / peonidin	1	1	15070	1	CPD-7072 [ C16 H13 O6, tgt= ]			(319.1113, 6992.9)(305.1135, 311.25)
1-<i>O</i>-(indol-3-ylacetyl)-&beta;-D-glucose /1D-1-O-(indol-3-yl)acetyl-myo-inositol /4-<i>O</i>-(indol-3-ylacetyl)-&beta;-D-glucose / 6-<i>O</i>-(indol-3-ylacetyl)-&beta;-D-glucose	136819	62521.5	125937	95197.2	CPD-1102 [ C16 H19 N O7, tgt=2.68, overall=2.68 ]			(319.1118, 6025.712)(340.1562, 5864.207)
<i>p</i>-nitrophenyl-&beta;-D-glucopyranoside	1	17208	15070	1	CPD-13211 [ C12 H15 N O8, tgt=44.51, overall=44.51 ]			(319.11194, 7738.5254)(305.11438, 318.08002)
(indol-3-yl)acetyl-L-tyrosine	426233	288690	252336	92755.6	CPD-11229 [ C19 H17 N2 O4, tgt=31.61, overall=31.61 ]			(319.11197, 5063.8965)(362.1064, 10021.342)(359.16583, 619.43097)(341.13278, 883.02747)(340.1563, 3225.2249)
(6-hydroxy-indol-3-yl)acetyl-L-phenylalanine / oxindole-3-acetyl-L-phenylalanine	404400	288690	89552	92755.6	CPD-9584 [ C19 H17 N2 O4, tgt=31.61, overall=31.61 ]			(319.11285, 5130.414)(362.1064, 10021.342)(359.16583, 619.43097)(341.13278, 883.02747)(340.15662, 2207.76)
5-[[4-methoxy-3-(phenylmethoxy)phenyl]methyl]-2,4-pyrimidinediamine	412486	828289	993417	1.02766e+06	CPD0-1591 [ C19 H20 N4 O2, tgt=34.63, overall=34.63 ]			(319.14752, 31751.824)(320.1499, 3812.0532)(323.15588, 7073.892)(319.1492, 39586.18)(320.15155, 5043.6875)(356.18817, 784.079)(337.18237, 5045.75)(360.34344, 821.526)(341.13385, 2141.375)
steviol	23151.4	73782.9	32565.5	1	CPD-14501 [ C20 H30 O3, tgt=44.17, overall=44.17 ]			(319.2207, 669.8933)(336.2568, 4458.5146)(341.20743, 1872.9968)
<i>ent</i>-cassa-12,15-diene-2&beta;,3&beta;-diol-11-one	108934	165450	158452	74388.6	CPD-16676 [ C20 H30 O3, tgt=44.17, overall=44.17 ]			(319.2207, 669.8933)(336.257, 5234.7583)(337.26666, 1169.1646)(341.20773, 2253.6333)
(+)-7-<i>epi</i>-12-oxojasmonoyl-L-isoleucine	290746	252904	289225	254112	CPD-19811 [ C18 H26 N O5, tgt=65.96, overall=65.96 ]			(321.18762, 8505.516)(342.20834, 1869.0293)(321.18875, 13162.757)(322.1908, 2265.04)(359.16675, 613.495)(341.15863, 14106.255)(342.16, 1090.3519)
gibberellin A<sub>9</sub>	463537	713278	203712	1.18848e+06	CPD1F-134 [ C19 H23 O4, tgt=21.18, overall=21.18 ]			(321.18793, 16055.484)(333.19998, 21110.008)(334.20312, 1842.2888)(335.213, 265.42)(315.1906, 19572.55)(316.1937, 1748.91)(340.15662, 120564.695)(341.15826, 15341.92)(342.1598, 1158.8855)(323.1557, 15111.768)(324.1586, 3181.29)
(+)-7-<i>epi</i>-12-hydroxyjasmonoyl-L-isoleucine	203216	1	77432.1	1	CPD-13420 [ C18H28NO5, tgt= ]			(321.1884, 32509.148)(322.19098, 4258.8047)(364.2043, 267.73)(321.18753, 11101.517)(322.1906, 1938.38)(342.20795, 3111.33)
ubiquinone-2	177592	180318	297642	255018	UBIQUINONE-2 [ C19 H26 O4, tgt=34.85, overall=34.85 ]			(321.18866, 9401.074)(323.15625, 14722.686)(324.15884, 3304.3975)
2-<i>O</i>-acetyl-3-<i>O</i>-<i>trans</i>-coutarate	131421	116827	30397	1	CPD-16579 [ C15 H12 O9, tgt= ]			(322.0515, 317.56)(357.08304, 1074.415)(358.0854, 425.44)(337.05963, 6618.375)(337.08212, 4202.0776)
ribavirin-5'-monophosphate	1	1	1	12850.2	CPD0-1492 [ C8 H11 N4 O8 P, tgt= ]			(322.0523, 5962.72)(349.0215, 3166.52)
<i>ent</i>-cassa-12,15-dien-2&beta;,3&beta;-diol / abieta-7,13-dien-18,18-diol / isopimaradiene-diol / levopiramadiene-diol / neoabietadiene-diol / oryzalexin D / oryzalexin E / palustradiene-diol / taxa-4(20),11-dien-5&alpha;,13&alpha;-diol	472349	405914	433179	551050	CPD-20413 [ C20 H32 O2, tgt=56.98, overall=56.98 ]			(322.26965, 523.405)(327.22803, 9179.063)(328.23114, 618.33276)(309.21835, 7085.3677)
(3-hydroxy-2-oxindol-3-yl)acetyl-L-aspartate	161075	107098	164418	4.90175e+06	3-HYDROXY-2-OXINDOLE-3-ACETYL-ASP [ C14 H12 N2 O7, tgt=63.16, overall=63.16 ]			(323.06818, 1349.4626)(302.4676, 112125.6)(304.05133, 32401.365)(305.0529, 3345.9426)(323.06876, 889.5733)(329.05286, 2729.4424)(330.0543, 659.186)
(<i>S</i>)-stylopine	248632	291111	398827	37431.6	S-STYLOPINE [ C19 H17 N O4, tgt=33.43, overall=33.43 ]			(323.12354, 2220.3289)(311.12384, 7140.896)(341.21744, 14915.041)(342.15985, 1151.7864)(325.136, 303.665)(346.1142, 3292.5737)
(<i>R</i>)-<i>N</i>-methylcoclaurine	125584	1	1	1	R-N-METHYLCOCLAURINE [ C18 H22 N O3, tgt= ]			(323.1564, 30609.22)(324.1591, 3829.51)
(-)-jasmonoyl-L-isoleucine / (-)-jasmonoyl-L-leucine / (+)-7-<i>epi</i>-jasmonoyl-L-isoleucine	72798.4	27974.6	82432.8	22297.2	CPD-11232 [ C18 H28 N O4, tgt=14.85, overall=14.85 ]			(323.21762, 8712.839)(324.22055, 555.846)(323.7202, 5116.093)(325.2244, 429.01334)(349.194, 7136.02)
6-decylubiquinone	72798.4	27974.6	48198.2	22297.2	CPD-7248 [ C19 H30 O4, tgt=61.19, overall=61.19 ]			(323.2181, 8918.817)(324.66672, 589.79553)
2-(8-hydroxy-2-oxotridecyl)-6-oxopyran-4-olate	135738	140634	165380	119465	CPD-17645 [ C18 H27 O5, tgt=13.58, overall=13.58 ]			(324.1922, 13789.012)(325.19537, 1866.9791)(305.1689, 859.2925)(324.19138, 10980.4795)(325.19464, 1100.1951)(323.21756, 7813.6265)(324.2203, 304.93)(349.1935, 1904.1483)
CMP group	46969.4	25157.8	1	1	CMP-GROUP [ C9H13N3O8P, tgt= ]			(325.05347, 9036.911)
1-<i>O</i>-caffeoyl-&beta;-<i>D</i>-glucose	94629.2	1	71922	1	CPD-16550 [ C15 H18 O9, tgt= ]			(325.09915, 9849.772)(360.7003, 5405.4644)(344.9858, 19725.766)(345.1307, 3490.976)(349.08426, 3331.8079)
coniferaldehyde glucoside	237320	518988	333466	1	CPD-81 [ C16H20O8, tgt= ]			(325.10925, 89255.38)(326.11185, 9139.311)(363.1538, 213.47)
&alpha;,&alpha;-trehalose / &alpha;-lactose / &alpha;-maltose / &beta;-D-cellobiose / &beta;-gentiobiose / &beta;-maltose / allolactose / fagopyritol A1 / fagopyritol B1 / galactinol / melibiose / sucrose	3.43478e+06	3.25613e+06	3.54776e+06	3.18477e+06	TREHALOSE [ C12 H22 O11, tgt=77.85, overall=77.85 ]			(325.10962, 84461.35)(326.11227, 8704.928)(363.15414, 164.17201)
<i>cis</i>-coumarinic acid-&beta;-<i>D</i>-glucoside / 4-O-&beta;-D-glucosyl-4-hydroxycinnamate	1.76949e+06	2.72524e+06	1.53013e+06	1.73451e+06	CPD-7417 [ C15 H17 O8, tgt=32.36, overall=32.36 ]			(325.10965, 82370.125)(326.11234, 8534.805)
6,7-dimethyl-8-(1-D-ribityl)lumazine	3.2572e+06	3.58128e+06	2.92005e+06	3504575	DIMETHYL-D-RIBITYL-LUMAZINE [ C13 H17 N4 O6, tgt=42.20, overall=42.20 ]			(325.10983, 81656.62)(326.11243, 8450.66)
5'-n-propylthioadenosine	1	1.2917e+06	1	3504575	5-N-PROPYLTHIOADENOSINE [ C13 H19 N5 O3 S, tgt=24.88, overall=24.88 ]			(325.1108, 77397.24)(326.11356, 8105.919)
(<i>S</i>)-<i>cis</i>-<i>N</i>-methylstylopine / columbamine	80769.4	72309.8	54899.2	1	CPD-7846 [ C20 H20 N O4, tgt=18.12, overall=18.12 ]			(325.13516, 730.5667)(340.15628, 3957.973)(341.15375, 497.53003)
(indol-3-yl)acetyl-L-methionine / ascorbigen / entacapone	1	11741.8	1	1	CPD-11228 [ C15 H17 N2 O3 S, tgt= ]			(325.1363, 331.38)(305.1209, 5788.94)
methyl-2-&alpha;-L-fucopyranosyl-&beta;-D-galactoside	3.31327e+06	2.79019e+06	3.22612e+06	2860802	CPD-8198 [ C13 H24 O10, tgt=69.83, overall=69.83 ]			(325.13632, 274.90335)(340.15714, 109401.82)(341.15863, 13787.205)(342.16, 1087.1599)(363.13635, 886.9961)(345.11185, 30263.426)(346.11475, 2747.66)
(-)-phaseollin	3.10726e+06	2.59606e+06	3.01207e+06	2.6574e+06	CPD-4884 [ C20 H18 O4, tgt=65.21, overall=65.21 ]			(325.13632, 280.07)(305.1196, 4602.3604)(305.12012, 4542.0225)(340.15714, 111393.18)(341.15863, 14081.2)(342.16, 1106.311)(323.15588, 11483.154)(324.15884, 3034.0798)(345.11185, 30834.807)(346.11475, 2798.6401)
(6&alpha;<i>S</i>,11&alpha;<i>S</i>)-2-dimethylallyl-3,6&alpha;,9-trihydroxypterocarpan	3.03638e+06	2.54935e+06	2.94664e+06	2.2755e+06	CPD-4404 [ C20 H20 O5, tgt=65.21, overall=65.21 ]			(325.13632, 280.07)(340.1571, 109257.336)(341.1586, 13770.881)(342.16, 1082.9379)(345.1118, 30290.201)(346.1147, 2756.7266)
(6&alpha;<i>S</i>,11&alpha;<i>S</i>)-4-dimethylallyl-3,6&alpha;,9-trihydroxypterocarpan / sophoraflavanone B	1.63688e+06	1.02014e+06	360494	2.2755e+06	CPD-4403 [ C20 H20 O5, tgt=65.21, overall=65.21 ]			(325.13632, 280.07)(340.15775, 112715.62)(341.15933, 14218.428)(342.1606, 1109.4315)(345.1125, 29666.656)(346.1154, 2569.8687)
(<i>E</i>)-1-(L-cystein-<i>S</i>-yl)-<i>N</i>-hydroxy-&omega;-(methylsulfanyl)nonan-1-imine	1.209e+06	1.82016e+06	120882	343838	CPDQT-410 [ C13 H26 N2 O3 S2, tgt=0.39, overall=0.39 ]			(325.13632, 280.07)(342.1608, 1057.6959)(322.90756, 12041.503)(324.15884, 3208.655)(345.13052, 2697.6577)
p-coumaroylserotonin	3.10793e+06	2.61918e+06	2.65299e+06	2.6574e+06	CPD-8936 [ C19 H18 N2 O3, tgt=35.79, overall=35.79 ]			(325.137, 265.76)(305.1195, 4579.2637)(325.136, 287.225)(305.12067, 4653.334)(340.15707, 108022.93)(341.15863, 14073.644)(342.16, 1114.3737)(323.15625, 9750.244)(324.15884, 2994.5225)(345.1125, 29643.8)(346.1148, 2770.4858)
(-)-phaseollidin	284457	317126	325941	286820	CPD-4885 [ C20 H20 O4, tgt=45.33, overall=45.33 ]			(325.14526, 730.9937)(342.17172, 11413.556)(347.12653, 5600.824)
gibberellin A<sub>34</sub>-catabolite	135581	1	1	40259.4	CPD-632 [ C19 H20 O6, tgt=42.21, overall=42.21 ]			(326.11234, 10045.752)(363.15408, 202.55)
5'-[(3-aminopropyl)-amino]-5'-deoxyadenosine	1.8856e+06	783238	1207814	631058	CPD0-1402 [ C13 H23 N7 O3, tgt=67.94, overall=67.94 ]			(326.19397, 2115.0)(307.1739, 41758.258)(308.17657, 5397.1416)(309.17847, 209.14)(326.19183, 847.1586)(343.22232, 26824.656)(344.22546, 4426.5835)(325.20914, 1106.48)
9-[6(RS)-8-diamino-5,6,7,8-tetradeoxy-&beta;-D-ribo-octofuranosyl]-9H-purin-6-amine	846797	601134	630509	631058	CPD0-1404 [ C13 H23 N7 O3, tgt=67.94, overall=67.94 ]			(326.19397, 2115.0)(307.17426, 25646.236)(308.17688, 2692.6863)(343.22232, 26824.656)(344.22546, 4426.5835)(325.20914, 1106.48)
3-undecyl-2-hydroxyl-1,4-naphthoquinone	440969	534309	399806	483206	CPD0-1689 [ C22 H30 O2, tgt=64.55, overall=64.55 ]			(327.22794, 9190.218)(328.23114, 579.91077)(309.21826, 6967.1562)
dihydrosorgoleone	200922	239130	264131	267266	CPD-10258 [ C22 H32 O3, tgt=64.76, overall=64.76 ]			(327.22803, 10139.084)(328.2311, 629.3323)
(4Z,7Z,10Z,13Z,16Z,19Z)-docosahexaenoate	440914	439103	488097	583948	CPD-10244 [ C22 H31 O2, tgt=30.39, overall=30.39 ]			(327.22806, 9172.64)(328.23114, 570.20435)(309.2184, 7188.383)
(<i>S</i>)-scoulerine / (S)-coreximine / (S)-corytuberine / 1,2-dehydroreticuline / salutaridine	15525000	17237500	16450000	17225000	S-SCOULERINE [ C19 H21 N O4, tgt=78.83, overall=78.83 ]			(328.14792, 580264.3)(329.15036, 82376.73)(330.1518, 9436.846)
di-homo-&gamma;-linolenate	137337	279198	159925	373481	CPD-8120 [ C20 H33 O2, tgt=17.80, overall=17.80 ]			(328.2451, 17228.713)(329.24774, 1641.5095)
cinnamoyl-&beta;-D-glucoside	15587500	17262500	16500000	17237500	TRANS-CINNAMOYL-BETA-D-GLUCOSE [ C15 H18 O7, tgt=49.62, overall=49.62 ]			(328.42987, 435046.53)(329.43198, 61131.9)(330.1513, 9351.693)(333.09015, 224.025)(315.0905, 202.79001)
ajmaline	282416	281758	296357	277118	CPD-4242 [ C20 H27 N2 O2, tgt=45.13, overall=45.13 ]			(329.20715, 856.665)(327.22797, 9725.592)(328.23108, 595.6526)
3-dehydrosphinganine (C20)	1.5791e+07	8.6893e+06	9.25909e+06	1.71071e+07	CPD-13610 [ C20 H42 N O2, tgt=62.82, overall=62.82 ]			(329.23657, 187990.0)(330.3271, 36207.387)(331.32956, 2411.211)(329.32507, 391939.53)(330.32755, 70562.73)(331.32962, 4495.8125)(352.5899, 371.56546)
arachidate / phytanate	1.57035e+07	8.6643e+06	9.45291e+06	1.72217e+07	ARACHIDIC_ACID [ C20 H39 O2, tgt=62.82, overall=62.82 ]			(329.32483, 272416.38)(330.3272, 48514.824)(331.3296, 3354.085)
16&alpha;, 17-epoxy gibberellin A<sub>9</sub> / carlactone carboxylate / gibberellin A<sub>20</sub> / gibberellin A<sub>4</sub> / gibberellin A<sub>51</sub>	21783.1	1	1	1	CPD-12354 [ C19 H23 O5, tgt= ]			(331.1838, 10781.17)(332.1871, 326.83)
gibberellin A<sub>14</sub>-aldehyde	236219	271266	261741	236626	CPD-6227 [ C20 H27 O4, tgt=15.29, overall=15.29 ]			(331.18393, 5241.933)(313.17392, 2959.2)(333.19937, 10241.758)(334.20258, 367.58334)(335.21402, 1290.9633)(349.2323, 153.17)(354.17212, 13695.876)(355.17395, 802.69293)
gibberellin A<sub>12</sub>	98205.6	88056.4	208005	224466	CPD1F-95 [ C20 H26 O4, tgt=29.11, overall=29.11 ]			(331.1842, 5758.8564)(333.0874, 357.47)(312.9213, 3919.6973)(338.16766, 3494.58)
kauralexin B2 / methyl gibberellin A<sub>9</sub>	29011.2	40230.6	1	104873	CPD-13543 [ C20H26O4, tgt= ]			(331.18527, 4779.42)(333.201, 471.26)(312.54266, 5005.1973)(338.16766, 3494.58)
gibberellin A<sub>3</sub> / gibberellin A<sub>6</sub>	254764	27361.4	336917	1	GIBBERELLIN [ C19 H21 O6, tgt=11.79, overall=11.79 ]			(332.1302, 614.198)(363.1699, 166.85)(345.1473, 1483.214)(373.1414, 129.26)
dihydrochelerythrine	78879.8	161424	1	24413	CPD-16781 [ C21 H19 N O4, tgt=18.03, overall=18.03 ]			(332.13025, 12907.0625)(333.13278, 745.45996)
dXMP / IMP	39500	19045.6	56755.2	1	CPD0-1468 [ C10 H11 N4 O8 P, tgt= ]			(333.02667, 647.385)(350.3147, 2043.0198)(351.01324, 5279.8003)(352.01355, 1599.595)
(L-cysteinylglycin-<i>S</i>-yl)(1<i>H</i>-indol-3-yl)acetonitrile	381151	109799	673247	152276	CPD-12635 [ C15 H16 N4 O3 S, tgt=8.22, overall=8.22 ]			(333.09006, 1025.58)(314.0883, 15882.64)(315.09073, 1686.5737)(337.0813, 903.3594)
(+)-5-deoxystrigol	1	1	47746.6	1	CPD-14652 [ C19H22O5, tgt= ]			(333.1469, 214.18)(355.1449, 160.66)
kauralexin A2	871226	766507	935463	157751	CPD-13540 [ C20 H28 O4, tgt=61.77, overall=61.77 ]			(333.19943, 17951.014)(334.38663, 1609.0515)(335.21454, 3243.0212)(336.2176, 466.03)(315.1905, 17299.016)(316.19354, 1470.7151)(317.32486, 2126.7456)(318.9619, 157.4825)(337.23038, 660.959)
capsiconiate	871226	766507	935463	823732	CPD-10356 [ C20 H28 O4, tgt=61.77, overall=61.77 ]			(333.1997, 18314.613)(334.3476, 1592.8396)(335.2148, 3000.6606)(336.2176, 466.03)(315.1905, 17299.016)(316.19354, 1470.7151)(317.3126, 2113.1113)(318.9619, 157.4825)(337.2306, 568.2025)
1,3-dioctanoylglycerol	414075	217286	413590	690884	CPD0-1815 [ C18 H34 O5, tgt=43.45, overall=43.45 ]			(335.25293, 2882.3113)(313.2343, 663.63)(348.2702, 12180.863)(349.27383, 1427.9717)(330.2595, 4288.0024)(353.2259, 36936.465)(354.22885, 5569.3965)(335.21497, 9461.644)
(9Z)-12,13,17-trihydroxyoctadeca-9-enoate	180350	274631	331699	290870	CPD-13087 [ C18 H33 O5, tgt=46.23, overall=46.23 ]			(335.25394, 8216.2295)(312.23676, 714.51465)
<i>ent</i>-7&alpha;-hydroxykaur-16-en-19-oate / kauralexin A3	1.2419e+06	1.03049e+06	1.16362e+06	1.14019e+06	CPD1F-136 [ C20 H29 O3, tgt=46.66, overall=46.66 ]			(335.25427, 35279.5)(336.25723, 6306.8)(337.26718, 1069.7089)
9,10,18-trihydroxystearate	81246.1	80435.6	71181	87715.8	91018-TRIHYDROXYSTEARATE [ C18 H35 O5, tgt=35.93, overall=35.93 ]			(335.2543, 12844.214)(336.25742, 1702.0275)(337.26877, 8756.365)(331.2803, 7076.369)
allopregnanolone	230529	342944	101595	1	3-BETA-HYDROXY-5-ALPHA-PREGNANE-20-ONE [ C21 H34 O2, tgt= ]			(336.28537, 41173.137)(337.28494, 8520.02)
dicoumarol	381909	158677	135047	253464	DICOUMAROL [ C19 H12 O6, tgt=31.23, overall=31.23 ]			(337.05972, 4287.427)(337.0607, 6029.205)(323.0692, 1359.7288)(337.0829, 4072.094)(341.0397, 553.10425)
1-O-galloyl-&beta;-D-glucose / 6-<i>O</i>-galloylglucose	127363	114585	27513.1	1	1-O-GALLOYL-BETA-D-GLUCOSE [ C13 H16 O10, tgt= ]			(337.0819, 4469.717)(337.0595, 8388.92)
(-)-jasmonoyl-L-phenylalanine / (+)-7-<i>epi</i>-jasmonoyl-L-phenylalanine	29262.6	25699	15049.9	1	CPD-11235 [ C21 H26 N O4, tgt= ]			(338.16656, 6825.578)(366.17215, 13787.385)
5-amino-1-(5-phospho-D-ribosyl)imidazole-4-carboxamide	131421	116827	30397	1	AICAR [ C9 H13 N4 O8 P, tgt= ]			(339.0538, 2799.6619)(322.0515, 317.56)(337.05975, 7298.684)(357.08304, 1074.415)(358.0854, 425.44)(337.08212, 4202.0776)
9-[6(RS)-C-carboxamido-5,6,7-trideoxy-&beta;-D-ribo-octofuranosyl]-9H-purin-6-amine	1	1	51436.8	1	CPD0-1405 [ C14 H20 N6 O5, tgt= ]			(339.15082, 918.20245)
&Delta;<sup>9</sup>-tetrahydrocannabinol /3-[(8Z,11E,13Z)-pentadeca-8,11,13-trien-1-yl] )catechol / 5-pentadecatrienyl resorcinol / cannabichromene / cannabidiol / oligomeric urushiol / progesterone	1	1	1	83382.9	CPD-7172 [ C21 H30 O2, tgt=2.31, overall=2.31 ]			(339.2134, 1319.1)(321.2033, 1364.05)
robustaquinone G	1.87119e+06	1.12446e+06	792927	1	CPD-9621 [ C18 H14 O8, tgt=2.22, overall=2.22 ]			(340.05106, 709.4067)(358.08447, 317.55667)(383.18604, 9966.355)
5-amino-6-(5-phospho-D-ribitylamino)uracil	150070	135264	29641.9	1	CPD-1086 [ C9 H15 N4 O9 P, tgt= ]			(340.0515, 392.8275)(337.05963, 6080.1465)(357.08328, 1179.06)(358.0852, 436.94)(377.05627, 1024.3611)
<i>S</i>-adenosyl 3-(methylsulfanyl)propylamine	80769.4	108111	54899.2	1	S-ADENOSYLMETHIONINAMINE [ C14 H24 N6 O3 S, tgt=47.12, overall=47.12 ]			(340.15604, 4072.0403)(341.15375, 497.53003)(380.21066, 382.62)(361.14172, 2483.9902)(356.18652, 5623.691)
deacetylcolchicine	2.60804e+06	2.2768e+06	2.61472e+06	2.36421e+06	CPD-9786 [ C20 H24 N O5, tgt=65.21, overall=65.21 ]			(340.1571, 108240.4)(341.15863, 13609.439)(342.16, 1072.1768)(363.13712, 986.9042)
mizoribine 5'-monophosphate	166377	116579	1	1	CPD-12503 [ C9 H12 N3 O9 P, tgt= ]			(341.03912, 476.245)(319.01373, 334.1125)(340.0512, 961.7261)(337.05966, 7523.613)
desmethylxanthohumol	225160	196927	38260.6	29781.8	CPD-7120 [ C20 H19 O5, tgt=20.27, overall=20.27 ]			(341.13245, 1445.3815)(343.1672, 887.29504)(362.10684, 12338.635)(363.11, 492.5775)
protopine	61252.6	34763.9	21540.5	1	PROTOPINE [ C20 H19 N O5, tgt=18.38, overall=18.38 ]			(341.13275, 395.7675)(371.15076, 4092.1416)(362.10727, 4258.2563)(363.11035, 285.46002)
(<i>E</i>)-1-(L-cysteinylglycin-<i>S</i>-yl)-<i>N</i>-hydroxy-&omega;-(methylsulfanyl)pentan-1-imine	91402.6	45867.8	14928.2	1	CPD-12394 [ C11 H21 N3 O4 S2, tgt=24.97, overall=24.97 ]			(341.13364, 5709.867)(323.12354, 2220.3289)
2,4-diamino-6-ethyl-5,3'-(2-trifluoromethylphenoxy)prop-1'-yloxypyrimidine	14513.5	11883.2	29566.8	1	CPD0-1585 [ C16 H19 F3 N4 O2, tgt= ]			(341.15244, 437.6167)(340.9032, 1032.7125)(341.1532, 357.72)
(<i>S</i>)-tetrahydrocolumbamine / dihydropapaverine	503455	495161	322772	267016	S-TETRAHYDROCOLUMBAMINE [ C20 H23 N O4, tgt=38.64, overall=38.64 ]			(341.15863, 15015.289)(342.16, 1180.2643)(323.15622, 10972.991)(324.15884, 3392.7676)(364.20627, 1836.3634)
coniferin	1	106147	21525.9	1	CPD-1777 [ C16 H22 O8, tgt=11.15, overall=11.15 ]			(342.13577, 10275.888)(330.1508, 12304.452)
(-)-lariciresinol / (+)-lariciresinol / (3R,4R)-3,4-bis(4-hydroxy-3-methoxybenzyl)tetrahydro-2-furanol / gibberellin A<sub>19</sub> / gibberellin A<sub>36</sub>	68462.4	47315.2	99237.8	131345	CPD-8908 [ C20 H24 O6, tgt= ]			(342.13705, 6516.4824)(383.13995, 937.23065)
cortisone	1	72099.2	138162	210566	CORTISONE [ C21 H28 O5, tgt=42.95, overall=42.95 ]			(342.17294, 11045.671)(386.19852, 5417.73)(364.2075, 1884.7776)
cannabinerolate	1.0149e+06	776199	2.60731e+06	3554282	CPD-7175 [ C22 H31 O4, tgt=16.35, overall=16.35 ]			(342.20734, 1024.765)(382.55228, 7273.6777)(384.36792, 1258.6985)(364.20703, 14492.144)(365.20892, 2910.5842)
5'-[(3-aminopropyl)methylamino]-5'-deoxyadenosine	229129	32235.9	314395	192361	CPD0-1403 [ C14 H25 N7 O3, tgt=45.64, overall=45.64 ]			(342.20868, 3390.3926)(321.18832, 14334.531)(322.19086, 2904.8499)(364.20578, 956.715)
9-[6(S),9-diamino-5,6,7,8,9-pentadeoxy-&beta;-D-ribo-nonafuranosyl]-9H-purin-6-amine	1	1	1	192361	CPD0-1406 [ C14H25N7O3, tgt= ]			(342.20953, 3658.8052)(321.18915, 10412.295)
mercuriphenyl acetate	193313	98538.8	27601.4	1	CPD-901 [ C8 H8 Hg O2, tgt=22.50, overall=22.50 ]			(343.04004, 2569.184)(315.0217, 10474.061)(316.02393, 1271.9066)(317.01672, 5221.08)(318.0175, 1033.75)(319.01443, 1092.5767)(351.06445, 509.85876)(340.05115, 750.2267)(349.38306, 4419.2886)(350.51926, 341.6775)(351.01566, 716.085)
quinidine / quinine	917753	1.03882e+06	1.37632e+06	1.18721e+06	CPD-9846 [ C20 H25 N2 O2, tgt=60.92, overall=60.92 ]			(343.223, 28793.176)(344.22604, 4833.222)(331.1828, 1358.854)
gibberellin A<sub>29</sub>-catabolite	135581	1	500456	40259.4	CPD-251 [ C19 H20 O6, tgt=42.21, overall=42.21 ]			(344.1297, 23273.533)(345.1305, 2869.7288)(326.11234, 10045.752)(364.66245, 2435.385)(366.1726, 4426.56)
7-deoxyloganate	119530	1	99076.2	1	CPD-9981 [ C16 H23 O9, tgt=46.30, overall=46.30 ]			(344.1297, 31822.13)(345.1311, 4608.06)(362.14075, 1014.58997)(377.17303, 9988.756)(378.1763, 163.59)(367.1315, 2028.98)
10&beta;,14&beta;-dihydroxytaxa-4(20),11-dien-5&alpha;-yl acetate	54362.6	23512.1	1	1	CPD-9194 [ C22 H34 O4, tgt= ]			(344.2261, 8294.177)(384.28455, 286.00333)
<i>S</i>-(2<i>E</i>,6<i>E</i>)-farnesyl-L-cysteine	2.6799e+06	3.03072e+06	2.80787e+06	2.7662e+06	CPD-12581 [ C18 H31 N O2 S, tgt=62.33, overall=62.33 ]			(344.25354, 414.865)(325.23456, 131664.23)(326.23715, 21772.748)(327.23975, 1636.223)
<i>sn</i>-1,2-di(2-propylpentanoyl)glycerol	494894	578161	367570	426886	CPD0-1759 [ C19 H36 O5, tgt=31.57, overall=31.57 ]			(344.25366, 2582.675)(326.23715, 20805.008)(327.23978, 1633.9508)(330.25977, 959.3786)(351.24844, 7435.549)(352.251, 295.97)
4-amino-2,6-dinitrotoluene glucoside	490757	381731	385649	280106	CPD-10456 [ C13 H17 N3 O9, tgt=35.38, overall=35.38 ]			(345.11066, 27042.557)(377.14032, 21580.076)(378.14346, 2781.3726)(363.13638, 908.16284)(382.07944, 18732.555)(383.07645, 12960.978)(384.0778, 317.14)
2-amino-4,6-dinitrotoluene glucoside	357198	239771	385649	280106	CPD-10452 [ C13 H17 N3 O9, tgt=35.38, overall=35.38 ]			(345.11066, 27042.557)(377.14032, 21580.076)(378.14346, 2781.3726)(363.13638, 908.16284)(382.0797, 14409.014)(383.0766, 10077.491)
4-coumaroyl-4'-hydroxyphenyllactate / hyperxanthone E	526812	523615	614137	499366	CPD-6976 [ C18 H15 O6, tgt=23.21, overall=23.21 ]			(345.11185, 31916.068)(346.11475, 2910.3176)(355.09814, 26766.787)
3-(methylsulfanyl)propyl-desulfoglucosinolate	712794	523615	614137	499366	3-METHYLTHIOPROPYL-DESULFO-GLUCOSINOLATE [ C11 H21 N O6 S2, tgt=44.06, overall=44.06 ]			(345.11185, 32185.363)(346.11475, 2948.1226)
<i>N</i>-(5-phosphoribosyl)-anthranilate / 1-(2-carboxyphenylamino)-1-deoxy-D-ribulose 5-phosphate	39500	19045.6	56755.2	1	N-5-PHOSPHORIBOSYL-ANTHRANILATE [ C12 H13 N O9 P, tgt= ]			(346.0422, 8277.31)(333.02667, 647.385)(350.3147, 2043.0198)(351.01324, 5279.8003)(352.01355, 1599.595)
cyclic pyranopterin phosphate /cyclic-GMP / guanosine 2',3'-cyclic monophosphate	160921	128261	241802	171317	PRECURSOR-Z [ C10 H11 N5 O7 P, tgt= ]			(346.04248, 5810.49)(348.0662, 4493.7964)(349.02072, 8410.438)(351.0156, 929.01)
dihydrochelirubine	504093	599771	635346	570427	DIHYDROCHELIRUBINE [ C21 H17 N O5, tgt=38.08, overall=38.08 ]			(346.11478, 2714.6921)(363.13715, 1028.5082)
10&beta;-hydroxytaxa-4(20),11-dien-5&alpha;-yl acetate	176628	233181	162829	800726	10-BETA-HYDROXYTAXA-42011-DIEN-5-ALPH [ C22 H34 O3, tgt=28.53, overall=28.53 ]			(346.25476, 16984.625)(347.2577, 1582.06)(328.24512, 17936.72)(329.24792, 1811.9421)
(<i>E</i>)-1-(L-cysteinylglycin-<i>S</i>-yl)-<i>N</i>-hydroxy-&omega;-(methylsulfanyl)octan-1-imine	40595.1	69552.6	15695.5	135324	CPD-12403 [ C14H27N3O4S2, tgt= ]			(347.1272, 7535.0366)(383.16666, 12326.789)(384.1703, 1094.9233)(371.14346, 364.39)(371.1631, 1167.84)
4-(indol-3-yl)butanoyl-&beta;-D-glucose	312906	223569	536251	12765.2	CPD-12621 [ C18 H23 N O7, tgt=65.54, overall=65.54 ]			(347.1277, 7026.8926)(371.1638, 850.56665)(386.19843, 6819.705)(366.17236, 21784.88)(367.1746, 3436.274)(390.04074, 1519.2412)
16,17-dihydro-16&alpha;,17-dihydroxy gibberellin A<sub>12</sub>	1.07155e+06	1.46737e+06	1.1596e+06	3.08864e+06	CPD-12360 [ C20 H28 O6, tgt=23.96, overall=23.96 ]			(347.19513, 1192.84)(383.05447, 6510.0054)(385.73096, 1016.64)(364.2068, 12416.237)(365.20844, 2529.913)(391.18924, 3570.054)
13-[(<i>E</i>)-2-methylcrotonoyl]oxylupanine	13526.1	35396.5	62375.6	116916	CPD-8918 [ C20 H31 N2 O3, tgt=45.51, overall=45.51 ]			(347.2577, 1619.9855)(352.21347, 9485.076)
tubercidine 5'-monophosphate	160921	127506	241802	171317	CPD0-1138 [ C11 H13 N4 O7 P, tgt= ]			(348.06625, 4351.903)(330.0561, 743.497)(348.06558, 4603.98)(349.07846, 1174.59)(330.4572, 644.13403)(349.08167, 1287.3011)(350.42645, 5877.1743)
dIMP	106338	24170.1	128487	87107.5	DIMP [ C10 H11 N4 O7 P, tgt=57.27, overall=57.27 ]			(348.06628, 8228.0205)(349.08084, 1888.3926)(331.213, 1229.0168)(353.03537, 1262.5734)
2-descarboxy-betanidin / 3',4',5'-<i>O</i>-trimethyltricetin / 4-coumaroyl-3',4'-dihydroxyphenyllactate / caffeoyl-4'-hydroxyphenyllactate / DIBOA-&beta;-D-glucoside	83692.8	23734.4	114605	77932	CPD-8854 [ C17 H15 N2 O6, tgt=33.14, overall=33.14 ]			(348.0663, 8787.763)(349.08072, 1975.8197)
humulone	349929	336288	414511	1	CPD-7106 [ C21 H29 O5, tgt=18.24, overall=18.24 ]			(348.1967, 1671.1781)(366.17273, 26251.252)(367.1749, 3207.7292)
adhumulone	349929	336288	414511	255306	CPD-19791 [ C21 H29 O5, tgt=18.24, overall=18.24 ]			(348.1967, 1671.1781)(366.1731, 25675.096)(367.17523, 3081.6833)
gibberellin A<sub>98</sub>	1	1	283242	335753	CPD-885 [ C20 H27 O5, tgt=2.95, overall=2.95 ]			(349.1951, 378.215)(365.21463, 8346.424)(347.1988, 1877.09)(352.17026, 224.3)
1,2-di-<i>S</i>-octyl-1,2-dimercapto-3-propanol	482498	382044	537274	557551	CPD0-1809 [ C19 H40 O S2, tgt=25.29, overall=25.29 ]			(350.78662, 3990.5405)(350.2512, 600.87)(353.26135, 1285.6366)(354.2649, 341.73)(335.25342, 10328.163)(348.27002, 10246.951)(349.2737, 1175.316)(353.22577, 22066.58)(354.22855, 4045.1116)
<i>N-P</i>-tosyl-L-phenylalanyl chloromethyl ketone	123566	98499.8	16702.4	1	CPD-6301 [ C17 H18 Cl N O3 S, tgt=59.88, overall=59.88 ]			(351.06464, 725.42285)(337.05957, 2674.78)(340.05148, 937.64667)(353.07935, 889.75665)(357.08337, 2350.97)(335.0699, 1535.145)(337.0601, 1911.0492)(354.41452, 1737.4283)(357.08432, 2744.085)(358.0851, 606.75336)(375.05792, 7520.9785)(376.0591, 2390.693)(377.05673, 2112.8508)(378.0577, 297.44)
16-methoxytabersonine	87649	63510.6	60488.1	1	CPD-7164 [ C22 H27 N2 O3, tgt=26.96, overall=26.96 ]			(351.207, 5179.235)(351.209, 21854.807)(352.213, 3706.9766)(368.22308, 7758.95)(373.17767, 1719.9707)
17-<i>O</i>-acetylajmaline	617808	571290	669609	1	CPD-8898 [ C22 H28 N2 O3, tgt=48.93, overall=48.93 ]			(351.2092, 21829.898)(352.21307, 3138.2908)(353.2241, 231.05)(373.17807, 1502.5249)(368.223, 5293.8975)
vindolidine	535619	529753	642276	929276	CPD-19897 [ C22 H29 N2 O3, tgt=48.93, overall=48.93 ]			(351.20993, 32350.611)(352.21332, 4459.096)(353.2241, 242.05)(353.2242, 465.09003)
prostaglandin E<sub>2</sub>	1.44226e+06	1.07161e+06	657337	1.1511e+06	5Z13E-15S-1115-DIHYDROXY-9-OXOPROS [ C20 H31 O5, tgt=44.95, overall=44.95 ]			(351.21045, 32686.37)(352.21384, 4516.167)(333.19968, 13461.74)(334.20294, 810.33997)(353.2253, 25006.16)(354.22818, 3794.6187)(335.21484, 3147.3489)(337.10394, 364.8425)(337.2301, 383.78)(351.2482, 2340.7642)
prostaglandin-H<sub>2</sub>	1.39473e+06	1.00996e+06	393509	886942	PROSTAGLANDIN-H2 [ C20 H31 O5, tgt=44.95, overall=44.95 ]			(351.2115, 47761.414)(352.2147, 6858.462)(333.19962, 13377.418)(334.20285, 797.5431)(335.21484, 3147.3489)(337.10394, 364.8425)(337.2301, 383.78)(351.24808, 2353.0337)
auricolate	44617.6	93679.6	41281.5	73556.4	CPD-12191 [ C22 H39 O3, tgt= ]			(351.2963, 444.09)(369.32532, 7251.0034)(370.3357, 1007.9755)
16&alpha;,17-epoxy gibberellin A<sub>4</sub> / gibberellin A<sub>1</sub> / gibberellin A<sub>29</sub> / gibberellin A<sub>34</sub>	163237	273461	142653	274660	CPD-12351 [ C19 H23 O6, tgt=11.64, overall=11.64 ]			(352.15738, 1743.5546)(351.15942, 1887.21)(347.1639, 11206.422)(348.16794, 584.9011)(371.3676, 3935.8162)(374.14062, 572.2029)
portulacaxanthin II	51801.2	23507.2	46117	1	CPD-8670 [ C18 H15 N2 O7, tgt=35.16, overall=35.16 ]			(353.0792, 1993.9299)(357.0832, 4491.805)(358.08508, 691.58)(389.12854, 10700.225)(390.13116, 459.17)(373.1247, 307.45)(395.069, 320.17)(376.05847, 4816.958)
<i>trans</i>-5-O-caffeoyl-D-quinate	73490.2	1	1	1	CAFFEOYLQUINATE [ C16 H17 O9, tgt=18.17, overall=18.17 ]			(353.07935, 1259.324)(335.0694, 1801.0481)(337.08258, 4048.42)
7,8-dihydroneopterin 3'-phosphate	138373	92803	85282.6	115785	DIHYDRONEOPTERIN-P [ C9 H12 N5 O7 P, tgt=10.33, overall=10.33 ]			(353.08014, 1034.0436)(336.79776, 807.32574)(337.0842, 3023.2148)(341.04, 1101.2456)
&beta;-nicotinamide D-ribonucleotide	9252.5	57642.6	14390.5	111777	NICOTINAMIDE_NUCLEOTIDE [ C11 H14 N2 O8 P, tgt= ]			(353.0808, 987.70215)(337.0868, 742.5825)(341.0406, 1140.1229)
(3<i>R</i>)-3-hydroxy-1,2-didehydro-2,3-dihydrotabersonine / 16-hydroxytabersonine	111585	126397	1	1	CPD-19891 [ C21 H25 N2 O3, tgt=38.97, overall=38.97 ]			(353.17575, 145.705)(358.16754, 26466.566)
<i>cis</i>-zeatin riboside	256757	291776	270765	349466	CPD-4442 [ C15 H21 N5 O5, tgt=47.98, overall=47.98 ]			(354.1714, 351.41)(354.92545, 637.73)(369.18256, 1702.5945)(374.14, 16873.709)(375.1431, 1446.0475)(361.13577, 982.1854)
<i>trans</i>-zeatin riboside	256757	291776	270765	349466	CPD-4208 [ C15 H21 N5 O5, tgt=47.98, overall=47.98 ]			(354.1714, 351.41)(354.92545, 637.73)(369.18256, 1702.5945)(374.14, 16873.709)(375.1431, 1446.0475)(361.13577, 982.1854)
(+)-7-<i>epi</i>-12-hydroxyjasmonoyl-L-phenylalanine / demecolcine	251457	176646	252415	1	CPD-19818 [ C21 H26 N O5, tgt=46.61, overall=46.61 ]			(354.1715, 13212.162)(355.1733, 756.8785)
(S)-isoandrocymbine	240224	250250	239065	278416	CPD-9789 [ C21 H25 N O5, tgt=15.64, overall=15.64 ]			(354.17206, 13772.447)(355.17398, 826.82574)
carnosate / deoxycohumulone	210256	250114	161931	236626	CPD-18103 [ C20 H27 O4, tgt=15.29, overall=15.29 ]			(354.17212, 13695.876)(355.17395, 802.69293)
1,2-dioctanoyl-3-methyl-1,2,3-butanetriol	532489	564550	700377	757563	CPD0-1763 [ C21 H40 O5, tgt=28.27, overall=28.27 ]			(354.2658, 270.63)(373.3043, 16375.01)(374.3073, 2601.77)(355.4379, 17269.777)(356.29767, 3681.4207)(373.30545, 13582.506)(374.30856, 2201.7476)
22-oxo-docosanoate	300455	354245	283030	335642	CPD-13098 [ C22 H41 O3, tgt=61.10, overall=61.10 ]			(354.30728, 15739.129)(355.31104, 1892.45)(339.30768, 1461.7831)
(<i>S</i>)-<i>N</i>-methylcanadine	253560	437069	253281	505086	S-N-METHYLCANADINE [ C21 H24 N O4, tgt=46.61, overall=46.61 ]			(354.49243, 16158.8545)(355.4946, 1304.9651)
2,3-dehydrokievitone / luteone / phaseoluteone	55584.9	114048	91165.4	97015.8	CPD-6645 [ C20 H17 O6, tgt=35.28, overall=35.28 ]			(355.0981, 3428.4702)(371.1455, 7221.013)(379.0954, 11648.718)(380.09833, 1290.4722)
DIMBOA-&beta;-D-glucoside	3.15592e+06	138745	504926	27259.6	CPD-6562 [ C15H19NO10, tgt= ]			(355.09848, 106813.83)(356.10117, 19058.39)(357.1034, 7842.44)(377.1402, 15536.583)(378.1442, 2319.465)(378.0828, 4493.035)(379.0936, 870.69)
scopolin	3.33564e+06	158454	566568	27259.6	SCOPOLIN [ C16 H18 O9, tgt= ]			(355.0992, 352124.88)(356.10175, 52287.32)(357.1034, 7366.955)(337.0875, 2453.5498)(355.0983, 39934.44)(356.10095, 6858.3335)(374.9368, 10856.442)(377.14227, 19749.006)(377.4826, 25026.238)(378.08255, 10979.27)(379.0943, 1725.83)(361.08414, 7387.9844)
(<i>S</i>)-tetrahydropalmatine	575430	645329	669814	731436	TETRAHYDROPALMATINE [ C21 H25 N O4, tgt=19.80, overall=19.80 ]			(355.16873, 23999.838)(356.17172, 3004.145)(356.18747, 4380.0225)(373.21478, 1496.4658)
7,8-dihydroberberine	638725	685350	642096	631131	CPD-16870 [ C20 H19 N O4, tgt=43.10, overall=43.10 ]			(355.1688, 28676.36)(356.17175, 3190.281)(340.15613, 747.5864)
(<i>E</i>)-1-(L-cysteinylglycin-<i>S</i>-yl)-<i>N</i>-hydroxy-2-(1<i>H</i>-indol-3-yl)ethan-1-imine	2.6922e+06	126482	437083	27259.6	CPD-12388 [ C15 H18 N4 O4 S, tgt= ]			(355.29913, 102231.75)(356.10135, 24553.568)(337.0875, 2608.185)(374.1399, 4528.6973)(379.09457, 1707.7916)(361.08414, 7514.496)
(+)-7-<i>epi</i>-12-hydroxy-12-oxojasmonoyl-L-isoleucine	81278.6	44028.1	1	47407.6	CPD-19812 [ C18 H25 N O6, tgt=16.14, overall=16.14 ]			(355.32428, 537.8929)
cyclo-dopa 5-<i>O</i>-glucoside	572477	145297	38844.1	130512	CPD-8656 [ C15 H18 N O9, tgt=77.18, overall=77.18 ]			(356.10114, 21591.19)(357.1034, 8987.2)(377.01007, 16138.823)(377.94376, 2935.9287)(361.136, 1051.29)(379.09604, 8114.4)(361.08374, 8592.418)
sinapoyl-(S)-malate	338038	1	1	1	SINAPOYL-S-MALATE [ C15 H14 O9, tgt= ]			(356.10175, 56400.227)(357.1034, 8007.56)
2-oleoylglycerol	128377	1	45736.6	94499.8	CPD0-1812 [ C21 H40 O4, tgt=19.04, overall=19.04 ]			(356.29877, 7796.563)(338.28473, 4111.015)(339.27878, 890.7933)
<i>p</i>-chloromercuribenzoate	421831	284706	347653	339054	CPD-29 [ C7 H4 Cl Hg O2, tgt=30.15, overall=30.15 ]			(356.97977, 3906.003)(357.981, 412.16)(370.9584, 8570.029)
5-(methylsulfanyl)pentyl-desulfoglucosinolate	2911410	126482	439222	27259.6	CPDQT-285 [ C13 H25 N O6 S2, tgt= ]			(357.1034, 8187.69)(375.93973, 11909.782)(377.6422, 8272.539)(378.1454, 2150.08)(379.0947, 1792.014)(361.08432, 7860.6353)
2'-hydroxy 3,7,3',4'-tetramethylquercetin / 3,3',4',5'-tetramethylmyricetin / 3,6,7,3'-tetramethylquercetagetin / 3,6,7,4'-tetramethylquercetagetin / 3,7,3',5'-tetramethylmyricetin / 7,3',4',5'-tetramethylmyricetin	415215	1	95741.6	44354.4	CPD-14854 [ C19 H18 O8, tgt=27.23, overall=27.23 ]			(357.1034, 8987.2)(377.1406, 20302.746)(378.14407, 3348.849)
D-galactosylononitol	45364.9	57469.2	1	1	CPD-8058 [ C13 H24 O11, tgt=4.65, overall=4.65 ]			(357.129, 6634.4927)(339.1187, 1297.2656)
galactopinitol A / galactopinitol B	67446.2	57469.2	1	1	CPD-8047 [ C13 H24 O11, tgt=7.20, overall=7.20 ]			(357.129, 6849.5996)(339.11874, 1451.6311)
22-hydroxydocosanoate	580488	223721	291528	364067	CPD-7838 [ C22 H43 O3, tgt=18.74, overall=18.74 ]			(357.19278, 1036.098)(339.3085, 1968.74)(343.3388, 728.4373)(355.45074, 14870.228)(356.4537, 1383.19)(383.33325, 323.61252)
behenate	357086	64289.6	1	236386	DOCOSANOATE [ C22 H43 O2, tgt=22.97, overall=22.97 ]			(357.35458, 16004.349)(358.3574, 1734.9806)(346.30234, 3152.869)
Fe(II)-nicotianamine	553631	641926	341084	358538	CPD-10157 [ C12 H21 Fe N3 O6, tgt=56.52, overall=56.52 ]			(357.5055, 520.2637)(363.69638, 328.538)(361.5921, 233.305)(365.1004, 1813.98)(381.0758, 151658.28)(382.421, 14384.953)(383.07446, 11383.561)
1-<i>O</i>-feruloyl-&beta;-<i>D</i>-glucose	340638	334804	279649	391652	CPD-15281 [ C16 H20 O9, tgt=44.17, overall=44.17 ]			(357.7784, 3867.4265)(361.13507, 990.713)(374.1401, 17541.102)(375.14316, 1544.9119)(361.13644, 1143.3345)(379.0952, 4771.0664)(380.098, 1926.8)
6-O-methyl-N-deacetylisoipecoside aglycon	48595.1	1	337168	49297.5	CPD-14813 [ C20 H26 N O6, tgt=41.51, overall=41.51 ]			(358.1676, 24753.76)(377.17343, 8020.595)(398.22025, 740.4038)(401.1751, 247.285)(382.16776, 1239.976)
(+)-piperitol	67446.2	89998.2	1	215820	CPD-8921 [ C20 H20 O6, tgt=47.58, overall=47.58 ]			(358.99902, 4273.7285)(339.11874, 1451.6311)(361.13617, 1329.8757)
1-stearoyl-<i>sn</i>-glycerol	454093	191562	199988	153894	CPD-16717 [ C21 H42 O4, tgt=46.43, overall=46.43 ]			(359.31042, 6732.605)(360.31396, 797.32)(341.30045, 4423.179)(359.31125, 4123.302)(341.3011, 3065.6975)(381.29236, 6418.053)(382.29504, 1228.1562)
(indol-3-yl)acetyl-L-tryptophan / gibberellin A<sub>8</sub>-catabolite	1	1	71922	1	CPD-11230 [ C21 H18 N3 O3, tgt= ]			(360.12405, 7012.5845)(344.1297, 27506.178)(345.1307, 3490.976)
(-)-pluviatolide	22082.4	13378.1	1	215820	CPD-17597 [ C20 H20 O6, tgt=47.58, overall=47.58 ]			(360.13422, 2742.6614)(339.11835, 1833.24)(361.1361, 1280.79)
4'-phosphopantetheine / 4'-phosphopantetheine group	432373	1	58851.8	1	PANTETHEINE-P [ C11 H21 N2 O7 P S, tgt= ]			(361.08423, 8919.813)(356.10135, 26394.648)(357.1034, 8187.69)
chelirubine	227855	198229	101151	56221.4	CPD-9893 [ C21 H16 N O5, tgt=24.46, overall=24.46 ]			(362.10693, 11274.875)(363.11, 492.5775)(364.10428, 1991.9849)
(<i>E</i>)-1-(L-cysteinylglycin-<i>S</i>-yl)-<i>N</i>-hydroxy-&omega;-(methylsulfanyl)nonan-1-imine	54192.1	34501.5	1	1	CPD-12406 [ C15 H29 N3 O4 S2, tgt=47.62, overall=47.62 ]			(362.1411, 1556.11)(403.14975, 4708.09)(398.2044, 4021.95)(382.167, 2215.67)(385.14316, 24228.531)(386.14633, 2609.71)(389.1376, 10649.023)(380.68625, 3621.8623)(384.18225, 7278.0)
1,4-dihydroxy-6,7,8-trimethoxy-2-methylanthraquinone / 3,7,4'-trimethylquercetin / 8-hydroxy-salvigenin / nevadensin / robustaquinone H	712794	523615	614137	499366	CPD-9632 [ C18 H16 O7, tgt=37.02, overall=37.02 ]			(363.13644, 642.95294)(345.11185, 32185.363)(346.11475, 2948.1226)
miraxanthin V	712794	523615	613452	499366	CPD-8659 [ C17 H16 N2 O6, tgt=25.21, overall=25.21 ]			(363.13705, 639.571)(345.11185, 31851.75)(346.11478, 2882.8928)(349.0845, 2539.46)(344.1299, 20622.28)(345.1308, 2123.65)
(<i>S</i>)-canadine / (R)-canadine / papaverine	2.30063e+06	1.99321e+06	2.30395e+06	2.07761e+06	S-TETRAHYDROBERBERINE [ C20 H21 N O4, tgt=65.21, overall=65.21 ]			(363.13712, 923.45905)(323.15588, 11250.568)(324.15884, 2955.0151)(340.15714, 109542.96)(341.15863, 13796.785)(342.16, 1104.7354)
clotrimazol	708039	569090	503030	537938	CPD-8926 [ C22 H17 Cl N2, tgt=49.63, overall=49.63 ]			(363.13715, 595.4472)(345.11194, 31609.402)(346.11484, 2816.6982)
(-)-matairesinol / (-)-pinoresinol / (+)-pinoresinol	352117	1	111440	110675	CPD-8912 [ C20H22O6, tgt= ]			(363.15408, 183.44)(358.1678, 23462.604)
gibberellin A<sub>8</sub>	61676.2	1	117443	1	CPD-204 [ C19 H23 O7, tgt= ]			(364.1567, 10000.81)(365.15936, 750.19)(345.1306, 1606.005)(366.17255, 21723.877)(367.17484, 2814.0415)(389.1514, 396.72)
methyl gibberellin A<sub>4</sub>	522351	342846	1.0117e+06	2.68355e+06	CPD-12332 [ C20 H26 O5, tgt=23.96, overall=23.96 ]			(364.20697, 16685.451)(365.209, 3253.3596)(348.0045, 3445.5789)(347.19693, 1131.5999)(352.15958, 1863.3628)(354.9474, 26822.893)(355.94897, 5700.6787)(356.1711, 987.04504)
16&alpha;, 17-epoxy gibberellin A<sub>12</sub> / gibberellin A<sub>110</sub> / gibberellin A<sub>14</sub> / gibberellin A<sub>15</sub> (open lactone form) / gibberellin A<sub>53</sub> / methyl gibberellin A<sub>20</sub>	522351	275870	787215	2.66013e+06	CPD-12353 [ C20 H26 O5, tgt=23.96, overall=23.96 ]			(364.20792, 18683.705)(365.209, 3253.3596)(346.19754, 5548.5737)(347.19693, 1131.5999)(352.1695, 114.215)
26,27-dehydrozymosterol / 5&alpha;-cholesta-7,24-dien-3-one / 7-dehydrodesmosterol /zymosterone	2.56324e+06	4.02061e+06	1.4702e+06	1.44777e+06	CPD-12159 [ C27 H42 O, tgt=38.36, overall=38.36 ]			(364.31708, 95868.03)(365.3199, 20057.623)(366.32263, 4758.7637)
glutathioselenol	37016.5	1	41490.2	1	CPD-13909 [ C10 H16 N3 O6 S Se, tgt= ]			(364.99777, 3594.7097)(407.02567, 24670.871)(408.02716, 4607.264)(409.0196, 6476.024)(410.0219, 342.49)(386.97568, 2950.41)
TRIBOA-&beta;-D-glucoside	505064	399919	255204	271876	CPD-13812 [ C14 H17 N O10, tgt=47.02, overall=47.02 ]			(365.0996, 728.26337)(382.07825, 15780.321)(383.07504, 10943.405)(384.0778, 317.14)
(<i>R</i>)-<i>S</i>-lactoylglutathione	382780	79249.4	1	1	S-LACTOYL-GLUTATHIONE [ C13H20N3O8S, tgt= ]			(365.09967, 811.47)(383.07495, 15339.982)(384.0778, 317.14)
rosmarinate	518230	311417	63466.8	1	CPD-6981 [ C18 H15 O8, tgt=27.73, overall=27.73 ]			(365.09973, 803.3354)(382.676, 15544.261)(383.21732, 8814.717)
1,4,5-trihydroxy-6,7,8-trimethoxy-2-methylanthraquinone / 2'-hydroxy 3,7,4'-trimethylquercetin / 3,3',5'-trimethylmyricetin / 3',4',5'-trimethylmyricetin / 3,6,7-trimethylquercetagetin / 3,7,3'-trimethylmyricetin / 3,7,3'-trimethylquercetagetin / 3,7,4'-trimethylquercetagetin / 7,3',5'-trimethylmyricetin / hydratedusnate	243750	132460	1	1	CPD-9633 [ C18 H16 O8, tgt=43.31, overall=43.31 ]			(365.09985, 583.765)(383.0751, 16420.348)(384.0778, 317.14)
cohumulone	1	1	1	267308	CPD-7108 [ C20H27O5, tgt= ]			(365.21085, 8883.615)(347.1988, 1877.09)(352.1712, 92.369995)
(3<i>S</i>,5<i>R</i>,6<i>R</i>)-3,5-dihydroxy-6,7-didehydro-5,6-dihydro-12'-apo-&beta;-caroten-12'-al	870457	774581	1.30543e+06	939686	CPD1F-4 [ C25 H34 O3, tgt=72.35, overall=72.35 ]			(365.2424, 1227.5542)(405.6826, 1575.5089)(365.24188, 3142.487)(383.2531, 37151.992)(384.25598, 7599.453)
16,17-dihydro-16&alpha;,17-dihydroxy gibberellin A<sub>4</sub>	120312	133988	311220	327731	CPD-12355 [ C19 H25 O7, tgt=25.61, overall=25.61 ]			(365.91925, 15980.042)(367.1747, 2084.1133)(366.17337, 13165.743)(367.1761, 3196.6973)(348.1654, 682.87)(387.19522, 373.7375)(389.1517, 1125.4612)(371.14474, 1169.25)(374.13962, 421.1314)
isopentenyladenine-7-<i>N</i>-glucoside	291637	335977	521365	399908	CPD-4602 [ C16 H23 N5 O5, tgt=69.78, overall=69.78 ]			(365.98013, 19278.246)(367.1755, 2708.3716)(366.17273, 37555.086)(367.17487, 5327.725)
isopentenyladenine-9-<i>N</i>-glucoside	27251.6	230222	355811	399908	CPD-4603 [ C16H23N5O5, tgt= ]			(366.10098, 22824.049)(367.17566, 2901.3433)(347.1632, 12645.93)(366.1725, 36210.5)(367.1746, 5358.04)(389.1724, 4226.39)(371.1462, 317.66)
dihydrozeatin-<i>O</i>-glucoside / dihydrozeatin-7-<i>N</i>-glucose / dihydrozeatin-9-<i>N</i>-glucoside	2.26397e+06	2.14959e+06	929071	1.30632e+06	CPD-4617 [ C16 H25 N5 O6, tgt=46.22, overall=46.22 ]			(366.12192, 3501.4797)(367.1764, 1214.09)(366.17395, 19251.934)(367.17633, 3041.5027)(402.9918, 2016.7144)(406.15964, 38785.973)(407.1624, 8367.494)(408.15936, 2929.6921)(409.17722, 590.0325)(389.1517, 540.33997)
sinefungin	169197	1	106724	190124	SINEFUNGIN [ C15 H24 N7 O5, tgt=13.07, overall=13.07 ]			(366.6766, 8996.305)(367.1747, 2834.83)(366.17288, 18676.29)(367.17523, 2834.9128)(402.12207, 7830.4473)(401.21423, 864.475)(406.1695, 1587.9)(388.1568, 456.12)
D-sedoheptulose 1,7-bisphosphate	134897	128466	83163.5	86492	D-SEDOHEPTULOSE-1-7-P2 [ C7 H12 O13 P2, tgt=28.26, overall=28.26 ]			(366.9832, 674.7586)(370.95822, 7076.249)(371.9593, 1828.0059)
CDTA	61676.2	1	145018	47376.5	CPD-14080 [ C14H22N2O8, tgt= ]			(367.26733, 16436.537)(367.17484, 3223.8616)(374.14047, 16710.094)(355.13184, 613.845)
all-<i>trans</i>-geranyl-geranyl monophosphate	450320	571290	580408	725172	CPD-12594 [ C20H33O4P, tgt= ]			(368.22174, 2780.5352)(351.20963, 31580.46)(352.2129, 4141.4116)(351.21042, 30546.03)(352.2137, 3938.6792)(368.22415, 3821.7678)(373.1793, 999.62)
desulfoglucobrassicin	409268	258104	120089	182796	CPD-1862 [ C16 H20 N2 O6 S, tgt=37.28, overall=37.28 ]			(369.11383, 10544.73)(370.1165, 3919.795)(386.84384, 2191.448)(374.14014, 15267.852)(391.09525, 3217.2847)(379.09518, 2360.282)
7-hydroxy-2-oxindole-3-acetate glucoside / dioxindole-3-acetyl-3-O-beta-glucose	409268	258104	120089	182796	7-HYDROXY-2-OXINDOLE-3-ACETIC-ACID-GLUCO [ C16 H18 N O9, tgt=28.03, overall=28.03 ]			(369.11383, 10544.73)(370.1165, 3919.795)(389.13705, 4351.55)(391.09525, 3217.2847)
1-<i>O</i>-sinapoyl-&beta;-D-glucose	409380	258104	120089	182796	1-O-SINAPOYL-BETA-D-GLUCOSE [ C17 H22 O10, tgt=40.57, overall=40.57 ]			(369.11383, 10544.73)(370.1165, 3919.795)(409.17773, 831.505)(389.13663, 3475.6558)(391.09525, 3217.2847)(386.14575, 1763.168)
6-hydroxyprotopine	305785	167030	52726.8	141493	6-HYDROXYPROTOPINE [ C20 H19 N O6, tgt=68.18, overall=68.18 ]			(369.1139, 10947.063)(370.1165, 3919.795)(374.14017, 14842.326)(375.1432, 1476.3833)
HMDBOA-glucoside	161734	167030	52726.8	141493	CPD-6561 [ C16 H21 N O10, tgt=0.95, overall=0.95 ]			(369.1139, 9171.607)(372.124, 168.89)(389.13715, 4202.1304)(410.108, 3232.32)
(-)-4'-demethyl-deoxypodophyllotoxin	300474	379697	225211	218364	CPD-18756 [ C21 H20 O7, tgt=29.00, overall=29.00 ]			(369.11407, 9749.063)(370.1165, 4380.95)(389.13742, 6945.228)(391.09534, 3317.9714)(385.14246, 17007.047)(386.14575, 1800.9773)
allocryptopine	200355	291776	280152	349466	ALLOCRYPTOPINE [ C21 H23 N O5, tgt=39.34, overall=39.34 ]			(369.1469, 10669.585)(370.15015, 385.84)(352.15662, 3322.51)(355.1682, 32486.664)(387.1926, 1464.83)(369.18268, 1556.0929)(374.1401, 17158.836)(375.14313, 1510.7869)
benzyladenine-7-<i>N</i>-glucoside / benzyladenine-9-<i>N</i>-glucoside	180651	127547	258766	157318	CPD-4607 [ C18 H21 N5 O5, tgt=14.98, overall=14.98 ]			(369.14752, 9783.046)(370.15033, 812.3212)(389.17224, 668.75336)(371.14697, 6888.385)
zymosterol	350821	34032.4	212293	118176	ZYMOSTEROL [ C27 H44 O, tgt=10.41, overall=10.41 ]			(369.33533, 3232.5613)(367.33615, 975.33496)(370.33606, 601.945)(408.3416, 10690.267)(409.3447, 1260.2878)
(-)-bursehernin	33430.1	43515.9	128936	1	CPD-17599 [ C21 H22 O6, tgt=22.95, overall=22.95 ]			(370.15033, 852.09)(357.1491, 1171.02)(371.14566, 6946.358)(389.1714, 326.22)(370.16592, 3150.6)(371.16296, 863.66504)(375.12094, 3730.2437)
feruloylserotonin	1	25556.5	1	1	CPD-8935 [ C20 H20 N2 O4, tgt= ]			(370.16724, 2825.545)(375.1228, 3894.6301)
5-<i>O</i>-methylthujaplicatin	79468	37007.6	103698	46293.1	CPD-17593 [ C21 H24 O7, tgt=33.47, overall=33.47 ]			(370.26138, 1001.9389)(389.1711, 298.58)(371.14606, 5479.011)(390.06854, 1945.0178)(392.1911, 133.97)
sinapaldehyde glucoside	1	15919	52984.8	1	CPD-79 [ C17 H22 O9, tgt=1.60, overall=1.60 ]			(371.14444, 7483.3594)(389.1714, 326.22)(370.399, 2160.4026)
(-)-5'-demethylyatein	358862	125056	235906	242217	CPD-18755 [ C21 H22 O7, tgt=9.52, overall=9.52 ]			(371.14444, 7920.3115)(371.1465, 6454.5894)(409.17822, 1967.4922)(389.17218, 580.352)
curcumin	176397	125056	231585	132601	CPD-6602 [ C21 H20 O6, tgt=6.83, overall=6.83 ]			(371.14444, 8025.776)(371.14554, 8209.8545)(389.1719, 642.64197)(369.14752, 10167.59)(370.78528, 4304.344)(371.147, 6834.17)
(<i>E</i>)-1-(L-cysteinylglycin-<i>S</i>-yl)-<i>N</i>-hydroxy-&omega;-(methylsulfanyl)heptan-1-imine	43680.4	38822.4	1	1	CPD-12400 [ C13 H25 N3 O4 S2, tgt=13.64, overall=13.64 ]			(371.14954, 7350.797)(352.15753, 2211.784)(356.10107, 2138.62)
1-(2-oxindole-3-acetyl)-&beta;-D-glucose	61252.6	44008.9	21540.5	1	CPD-9592 [ C16 H19 N O8, tgt=17.75, overall=17.75 ]			(371.1504, 4678.5117)(379.76553, 5550.0938)(380.1002, 1273.4)(362.10703, 4938.906)(363.11035, 285.46002)
docosanedioate	312641	321606	357818	298100	CPD-13101 [ C22 H40 O4, tgt=61.11, overall=61.11 ]			(371.31085, 2461.0496)(371.3125, 3782.15)(391.27936, 16154.302)(392.28247, 2796.619)
1,2-dioctanoyl-1,2,6-hexanetriol	316663	309509	369498	296969	CPD0-1761 [ C22 H42 O5, tgt=61.11, overall=61.11 ]			(371.31085, 2634.6094)(371.3125, 1891.08)(391.27936, 16027.059)(392.28247, 2740.0767)
6-(methylsulfanyl)hexyl-desulfoglucosinolate	265870	150403	229054	132601	CPDQT-417 [ C14 H27 N O6 S2, tgt=20.72, overall=20.72 ]			(371.97192, 8709.619)(374.8068, 1183.5232)(369.35574, 10739.438)(370.70496, 962.49445)(379.0955, 9068.828)(380.09915, 1343.4467)
6,7-O,O-dimethyl-N-deacetylisoipecoside aglycon	33005.1	1	1	1	CPD-14814 [ C21 H28 N O6, tgt=19.81, overall=19.81 ]			(373.1783, 13722.63)(374.182, 270.89)
arctigenin	146488	149022	185909	166516	CPD-17600 [ C21 H24 O6, tgt=47.03, overall=47.03 ]			(373.1817, 8989.646)(374.182, 171.56)(399.00256, 1203.1877)(399.15765, 3161.48)(377.14145, 21236.982)(378.14462, 2511.4243)
(S)-autumnaline	468488	655040	665422	474611	CPD-9790 [ C21 H27 N O5, tgt=42.67, overall=42.67 ]			(373.18307, 5184.5283)(374.182, 128.67)(355.20032, 16160.273)(356.1715, 3052.666)(356.18744, 1769.5631)(373.21457, 1327.9349)
7-<i>O</i>-acetylsalutaridinol	282667	276274	252415	260628	7-O-ACETYLSALUTARIDINOL [ C21 H26 N O5, tgt=46.61, overall=46.61 ]			(373.18356, 7273.0425)(354.44012, 13556.8545)(355.30966, 1173.7134)
(-)-thujaplicatin	183869	184290	266997	203872	CPD-17592 [ C20H22O7, tgt= ]			(374.13953, 16306.322)(375.14267, 1244.1117)(361.13538, 732.96893)(361.13428, 1247.645)
digitoxigenin	833566	985448	1.06961e+06	1.17743e+06	CPD-10537 [ C23 H34 O4, tgt=33.67, overall=33.67 ]			(375.26328, 32235.764)(376.2662, 6699.2026)(377.2703, 361.23)(393.27344, 9138.741)(394.27673, 1395.1753)(375.2648, 32984.76)(376.26773, 6805.4897)
phytyl monophosphate	833566	985448	1.06961e+06	1.17743e+06	CPD-7025 [ C20 H39 O4 P, tgt=73.60, overall=73.60 ]			(375.26395, 32540.041)(376.26685, 6742.382)(377.2703, 361.23)
gibberellin A<sub>28</sub> / gibberellin A<sub>43</sub>	1.07491e+06	1.22424e+06	1.06355e+06	934572	CPD-6225 [ C20 H23 O8, tgt=63.83, overall=63.83 ]			(375.6402, 8299.212)(377.60916, 8162.839)(378.14462, 1840.9857)(409.17853, 35087.605)(410.18225, 5672.251)(411.1839, 193.4)
rot-2'-enonate	534869	575679	497252	478463	CPD-9534 [ C23 H23 O6, tgt=51.88, overall=51.88 ]			(377.14087, 20283.506)(378.1442, 2620.912)(413.1727, 4713.826)(404.1491, 278.0)
deguelin / rotenone	387629	399457	385649	382426	CPD-12163 [ C23 H22 O6, tgt=51.69, overall=51.69 ]			(377.14087, 20407.104)(378.1442, 2615.8157)(413.1727, 4724.809)
kinetin-7-<i>N</i>-glucoside / kinetin-9-<i>N</i>-glucoside	321384	444415	100676	424544	CPD-4610 [ C16 H19 N5 O6, tgt=31.02, overall=31.02 ]			(377.14093, 19911.412)(378.14435, 2567.9136)(363.13712, 1064.8604)(363.1382, 1394.49)
gibberellin A<sub>25</sub>	170666	105202	32778.5	1	CPD1F-84 [ C20 H23 O6, tgt=18.16, overall=18.16 ]			(377.1728, 9179.325)(378.1763, 163.59)(387.15625, 951.32886)
17-<i>O</i>-acetylnorajmaline	70936.2	1	1	1	17-O-ACETYLNORAJMALINE [ C21 H26 N2 O3, tgt= ]			(377.1732, 17487.64)(378.1763, 163.59)
<i>all-trans</i>-10'-apo-&beta;-carotenal / 9-<i>cis</i>-10'-apo-&beta;-carotenal	607816	619410	655789	762623	CPD-13368 [ C27 H36 O, tgt=69.20, overall=69.20 ]			(377.2791, 15217.596)(378.28223, 2709.904)
3-hydroxypropyl-glucosinolate	29153.9	20640	1	1	3-HYDROXYPROPYL-GLUCOSINOLATE [ C10 H18 N O10 S2, tgt=45.86, overall=45.86 ]			(377.30603, 2798.9075)(376.05835, 4261.6396)
12-hydroxydihydrochelirubine	302345	291413	108636	85046.2	12-HYDROXYDIHYDROCHELIRUBINE [ C21 H17 N O6, tgt=19.93, overall=19.93 ]			(379.0951, 14495.526)(380.09814, 1356.5118)(362.30707, 8163.6587)(364.10452, 1324.9224)(385.12103, 1093.5833)(362.1087, 14648.77)
S-adenosyl-4-methylsulfanyl-2-oxobutanoate	240912	278877	13683.6	1	S-ADENOSYL-4-METHYLTHIO-2-OXOBUTANOATE [ C15 H19 N5 O6 S, tgt=67.10, overall=67.10 ]			(379.0951, 17449.867)(380.09836, 1373.6283)(403.1457, 383.38)
(2<i>E</i>,6<i>E</i>)-farnesyl diphosphate / (2Z,6Z)-farnesyl diphosphate	225160	225287	101151	85046.2	FARNESYL-PP [ C15 H25 O7 P2, tgt=20.18, overall=20.18 ]			(379.09662, 12804.084)(380.09988, 1019.8567)(362.1067, 10969.562)(363.9744, 1711.7396)(364.1041, 3718.923)(385.12262, 1239.78)
&Delta;<sup>9</sup>-tetrahydrocannabinolate / (-)-secoisolariciresinol / (+)-secoisolariciresinol /cannabichromenate /cannabidiolate / gibberellin A<sub>37</sub> / gibberellin A<sub>97</sub> /gibberellin<sub>44</sub> (open lactone form) /methyl gibberellin A<sub>34</sub> / sorgoleone	1	1	234541	1	CPD-7169 [ C22 H29 O4, tgt= ]			(380.20105, 2885.515)(362.19116, 6757.705)
O-sinapoylglucarolactone	4.00993e+06	3.17998e+06	2.10955e+06	2.40447e+06	O-SINAPOYLGLUCAROLACTONE [ C17 H18 O11, tgt=67.82, overall=67.82 ]			(381.07584, 147243.75)(382.0783, 15272.737)(383.07516, 10639.085)
colupulone	1	1	36416.1	1	CPD-7111 [ C25 H35 O4, tgt= ]			(381.23718, 6630.4)(409.25, 1634.065)
5-formamido-1-(5-phospho-D-ribosyl)-imidazole-4-carboxamide	482075	366522	315301	408281	PHOSPHORIBOSYL-FORMAMIDO-CARBOXAMIDE [ C10 H13 N4 O9 P, tgt=50.21, overall=50.21 ]			(382.07834, 16435.775)(383.07523, 11369.532)(384.0778, 317.14)(391.0344, 523.445)
norbixin	151736	344468	556991	655046	CPD-7971 [ C24 H26 O4, tgt=51.97, overall=51.97 ]			(382.2175, 2551.9272)(401.17566, 16112.52)(402.17896, 1866.9219)(383.1651, 9197.4375)(384.1692, 556.6253)
cannabigerolate	1.0149e+06	744081	2.53144e+06	3554282	CPD-7166 [ C22 H31 O4, tgt=16.35, overall=16.35 ]			(382.21768, 7517.3887)(383.22098, 1567.458)(364.20755, 15326.685)(365.20892, 2910.5842)
deacetoxyvindoline	1	1	943258	560378	DEACETOXYVINDOLINE [ C23 H31 N2 O4, tgt= ]			(382.21777, 19516.186)(383.2208, 2250.53)
(13<i>S</i>,14<i>R</i>)-13-<i>O</i>-acetyl-1,8-dihydroxy-<i>N</i>-methylcanadine / 6-hydroxy-allocryptopine	273130	420116	197359	117783	CPD-14830 [ C21 H23 N O6, tgt=13.71, overall=13.71 ]			(385.14233, 19320.473)(386.14575, 1812.9854)
O-methylandrocymbine	468056	112334	282074	122125	CPD-9788 [ C22 H27 N O5, tgt=26.77, overall=26.77 ]			(386.1966, 18215.256)(387.19925, 618.24805)(367.17548, 4385.9067)(386.19714, 36262.28)(387.1998, 4153.665)(403.21365, 5809.291)(413.1857, 1681.0801)
(3R)-3-hydroxy-16-methoxy-2,3-dihydrotabersonine /deacetylvindorosine	324468	319071	302451	292288	16-METHOXY-23-DIHYDRO-3-HYDROXYTABERSON [ C22 H29 N2 O4, tgt=24.68, overall=24.68 ]			(386.23395, 18869.479)(387.23648, 1889.5447)(391.1891, 11811.287)(392.1912, 432.22665)
adenosine 5'-propyl phosphate	13226.8	1	36665.8	1	CPD-9429 [ C13 H19 N5 O7 P, tgt= ]			(389.12866, 10283.22)(390.13138, 404.24332)
<i>S</i>-adenosyl-L-homocysteine	300474	379697	225211	218364	ADENOSYL-HOMO-CYS [ C14 H20 N6 O5 S, tgt=23.00, overall=23.00 ]			(389.1356, 8053.984)(369.1132, 5057.71)(389.1361, 7042.973)(369.11383, 9775.167)(370.1165, 4380.95)(385.14246, 17007.047)(386.98715, 3247.7979)(389.1372, 7636.2676)(391.09525, 3272.249)
secologanin	148465	1.43364e+06	133911	169616	SECOLOGANIN-CPD [ C17 H24 O10, tgt=66.92, overall=66.92 ]			(389.15, 578.72)(370.1165, 3308.125)(389.13705, 9040.7705)(374.14017, 15790.624)(375.14325, 1587.8073)(407.97028, 53386.707)(407.1611, 20521.422)(408.15826, 5678.055)(409.17645, 730.26)(389.1725, 325.43)
<i>cis</i>-tuberonic acid glucoside / <i>trans</i>-tuberonic acid glucoside	112760	59684.1	258766	92946	CPD-19813 [ C18 H27 O9, tgt=6.71, overall=6.71 ]			(389.17224, 668.75336)(369.14734, 10604.3125)(370.15033, 812.3212)(387.19385, 1204.7753)
loganin	104496	1	1	1	LOGANIN [ C17 H26 O10, tgt=81.43, overall=81.43 ]			(391.15173, 8930.595)(392.1479, 789.015)(414.1455, 30704.557)(415.1485, 4972.8623)
heliocide H1 / heliocide H2 / heliocide H3 / heliocide H4	176524	52830.6	27060.6	1	CPD-9741 [ C25 H29 O5, tgt=51.64, overall=51.64 ]			(391.18875, 12619.911)(392.1912, 418.41)
deoxycholate	369895	358947	395399	331554	DEOXYCHOLATE [ C24 H39 O4, tgt=39.15, overall=39.15 ]			(391.27936, 18132.428)(392.28247, 3211.4229)
gibberellin A<sub>13</sub> / gibberellin A<sub>17</sub> gibberellin A<sub>46</sub>	644454	686621	476109	383660	CPD-6221 [ C20 H23 O7, tgt=50.61, overall=50.61 ]			(393.18414, 32476.332)(394.18713, 5116.518)(395.19482, 780.74335)
bixin	1	1	1	105960	CPD-7972 [ C25 H29 O4, tgt= ]			(393.2365, 13771.24)(394.2397, 268.865)
2-(3-benzoylphenyl)-3,5,7-trihydroxychromen-4-one	542333	134154	413333	1	CPD-15122 [ C22 H12 O6, tgt=12.88, overall=12.88 ]			(395.05835, 13268.239)(396.06064, 477.083)(355.0606, 1726.59)(373.07153, 338.21335)(377.07886, 61.35)(390.09726, 1831.28)(391.0967, 782.53503)
prochloraz	194638	214817	117074	167554	CPD-16787 [ C15 H16 Cl3 N3 O2, tgt=47.50, overall=47.50 ]			(395.06226, 9082.767)(396.06396, 482.73502)(375.05807, 5914.155)(376.05957, 1785.5234)(407.02628, 27903.63)(408.02786, 5484.1724)
<i>N</i><sup>2</sup>-hydroxyguanosine 5'-monophosphate / 8-oxo-GMP	194626	192635	105767	156130	CPD0-1035 [ C10 H12 N5 O9 P, tgt=39.85, overall=39.85 ]			(395.06232, 9414.849)(396.06396, 482.73502)(381.07574, 114949.98)(382.0783, 11643.173)
2'-hydroxy 3,6,7,4'-tetramethylquercetagetin	1	67384.2	1	1	CPD-14861 [ C19 H18 O9, tgt= ]			(395.0632, 11110.605)(396.06537, 615.72)
8-(methylsulfanyl)octyl-desulfoglucosinolate	81509.2	151304	238265	216406	CPDQT-419 [ C16 H31 N O6 S2, tgt= ]			(398.1511, 6631.5645)(399.1519, 340.67)(419.68658, 2079.266)(420.18378, 409.915)(401.17517, 3534.6262)
isoarctigenin	213748	480216	263187	166516	CPD-17601 [ C21 H24 O6, tgt=47.03, overall=47.03 ]			(399.00256, 1203.1877)(399.15765, 3161.48)(359.16544, 528.52997)(391.1903, 3424.14)(377.14145, 21236.982)(378.14462, 2511.4243)(373.1817, 8989.646)(374.182, 171.56)
17-O-deacetylvindoline	230945	23355.4	1	32660.5	17-O-DEACETYLVINDOLINE [ C23 H31 N2 O5, tgt= ]			(400.21317, 4248.705)(401.21417, 1086.88)(400.2142, 1249.0333)(421.1929, 3261.5)
(-)-yatein	447878	433208	556980	654892	CPD-17595 [ C22 H24 O7, tgt=48.39, overall=48.39 ]			(401.17566, 15890.352)(402.17892, 1818.3671)
7-(methylsulfanyl)heptyl-desulfoglucosinolate	482042	462339	607000	712000	CPDQT-418 [ C15 H29 N O6 S2, tgt=57.03, overall=57.03 ]			(401.17566, 16157.036)(402.17892, 1850.6494)(383.16534, 9364.793)(384.16907, 534.7205)
<i>O</i>4,<i>O</i>5--dimethylthujaplicatin	650615	606930	120695	156755	CPD-17594 [ C22 H26 O7, tgt=0.46, overall=0.46 ]			(405.167, 2913.195)(387.15753, 971.7246)(406.1996, 175.165)(425.3336, 8208.532)(426.15756, 408.49667)(409.059, 1626.2479)(411.1581, 97.68)
neolinustatin	2.16727e+06	2.56681e+06	969406	1606152	CPD-14596 [ C17 H29 N O11, tgt=49.68, overall=49.68 ]			(405.82773, 9537.78)(407.16052, 231.1)(409.1757, 234.61)(425.19653, 8585.383)(426.19904, 1999.195)(406.1599, 51761.465)(407.163, 7763.124)(408.1597, 2740.0603)(409.17725, 567.14996)(425.19836, 16744.312)(426.20105, 2791.4368)(447.17783, 387.81198)(429.16544, 183.37666)
<i>cis</i>-zeatin-<i>O</i>-glucoside / <i>cis</i>-zeatin-7-<i>N</i>-glucoside / <i>cis</i>-zeatin-9-<i>N</i>-glucoside / <i>trans</i>-zeatin-<i>O</i>-glucoside / <i>trans</i>-zeatin-7-<i>N</i>-glucoside / <i>trans</i>-zeatin-9-<i>N</i>-glucoside	61676.2	1	106724	1	CPD-4620 [ C16 H23 N5 O6, tgt= ]			(406.1586, 5253.064)(407.1711, 327.86)(364.15677, 12374.313)(365.15936, 897.52496)(403.2128, 5786.546)
3-<i>O</i>-acetyl-4'-<i>O</i>-demethylpapaveroxine	255100	239776	329304	267194	CPD-14831 [ C21 H23 N O7, tgt=34.66, overall=34.66 ]			(406.15875, 141675.06)(406.1607, 55414.887)(407.16495, 8450.686)(389.15198, 943.63995)(419.18604, 3015.3982)(420.18542, 1914.5801)(401.17526, 11466.007)(402.17828, 1848.5887)(425.13745, 2048.6965)
benzyl alcohol 6-<i>O</i>-&beta;-<i>D</i>-xylopyranosyl-&beta;-<i>D</i>-glucopyranoside	322132	364430	188038	108269	CPD-14734 [ C18 H26 O10, tgt=53.00, overall=53.00 ]			(406.15955, 8002.2676)(407.16077, 987.68005)(385.43024, 16954.3)(386.14566, 1914.3423)(406.15894, 19766.875)(407.16205, 657.995)(385.1417, 10136.79)(386.1455, 1036.87)(420.1811, 13857.21)(421.1927, 3079.38)(402.1785, 794.99)(425.14673, 7952.904)(426.1587, 412.33)
benzyl 6-<i>O</i>-&beta;-<i>D</i>-apiofuranosyl-&beta;-<i>D</i>-glucopyranoside	130729	69696.4	1	108269	CPD-14739 [ C18 H26 O10, tgt=53.00, overall=53.00 ]			(406.15955, 8002.2676)(407.16077, 987.68005)(386.15073, 9258.597)(386.14694, 1501.3834)(406.15894, 19766.875)(407.16205, 657.995)(420.1811, 13857.21)(421.1927, 3079.38)(425.14673, 7952.904)(426.1587, 412.33)
3,6,7,3',4'-pentamethylquercetagetin / 3,7,3',4',5'-pentamethylmyricetin	2.15099e+06	2.56681e+06	881472	1606152	CPD-14860 [ C20 H20 O8, tgt=38.55, overall=38.55 ]			(406.15976, 49299.773)(407.1628, 7247.3613)(408.1597, 2738.5684)(409.17725, 567.14996)(389.1513, 523.45306)
glucoiberin	519368	773491	788287	751365	3-METHYLSULFINYLPROPYL-GLUCOSINOLATE [ C11 H20 N O10 S3, tgt=36.30, overall=36.30 ]			(407.02536, 35164.71)(409.01886, 10380.357)(407.02707, 36443.715)(408.0287, 6867.012)(409.02075, 10558.269)
tetrahydrothiamine diphosphate	615402	909931	928684	885052	CPD0-1354 [ C12 H19 N4 O7 P2 S, tgt=25.68, overall=25.68 ]			(407.0262, 38156.676)(408.02786, 7347.8965)(411.0395, 309.615)
glucoiberverin	544940	1118462	816898	1.09903e+06	3-METHYLTHIOPROPYL-GLUCOSINOLATE [ C11 H20 N O9 S3, tgt=35.83, overall=35.83 ]			(407.0263, 38424.383)(408.02792, 7426.786)(409.01987, 11406.831)(410.5303, 302.525)(411.0403, 318.61)
campestanol / cycloeucalenone	324491	1	156180	240891	CPD-710 [ C28 H50 O, tgt=40.92, overall=40.92 ]			(407.36948, 16601.924)(408.37222, 2690.6248)
bixin dimethyl ester	343865	279678	367819	289708	CPD-7973 [ C26 H32 O4, tgt=45.37, overall=45.37 ]			(408.25577, 694.3443)(432.2327, 18361.848)(433.23615, 3528.7559)(415.20718, 75471.51)(416.20966, 16738.137)(417.21237, 1550.0491)
&alpha;-tocotrienol	35757.2	341329	108919	120589	CPD-15836 [ C29 H44 O2, tgt= ]			(408.34113, 8406.087)(409.344, 1101.9316)(408.3422, 9077.159)(409.34637, 1639.358)(447.3274, 29876.41)(448.32986, 3253.245)
&delta;-tocopherol / (22<i>R</i>)-hydroxycholesterol / 2-methyl-6-phytyl-1,4-benzoquinol	25598.2	76489	127475	120589	DELTA-TOCOPHEROL [ C27 H46 O2, tgt= ]			(408.34167, 10931.197)(409.3448, 1343.5275)
4&alpha;-formyl-ergosta-7,24(24<sup>1</sup>)-dien-3&beta;-ol	160805	210732	142130	222326	CPD-12908 [ C29 H46 O2, tgt=23.93, overall=23.93 ]			(408.34167, 11380.555)(409.34473, 1416.5824)(432.34225, 16886.314)(433.3452, 3352.4656)
5&alpha;-cholesta-7,24-dien-3&beta;-ol / 7-dehydrocholesterol / desmosterol	350821	1	122209	67592.8	5-ALPHA-CHOLESTA-724-DIEN-3-BETA-OL [ C27 H44 O, tgt=10.41, overall=10.41 ]			(408.34293, 11299.052)(409.3462, 1470.84)(370.33606, 601.945)
4&alpha;-formyl-4&beta;-methyl-5&alpha;-cholesta-8,24-dien-3&beta;-ol	1	1	1	137125	CPD-4576 [ C29H46O2, tgt= ]			(408.34308, 12507.644)(409.34637, 1711.252)
dIDP	1	1	37222.8	1	CPD0-2231 [ C10 H11 N4 O10 P2, tgt=64.80, overall=64.80 ]			(409.0182, 14140.2)(410.0219, 273.99)
ADP group	50236	82846.6	88432.4	1	ADP-GROUP [ C10 H13 N5 O10 P2, tgt= ]			(409.01895, 13566.3545)
dADP	242057	346412	373904	348044	DADP [ C10 H12 N5 O9 P2, tgt=4.18, overall=4.18 ]			(409.01978, 12765.737)(410.0219, 304.43)(408.02786, 8319.388)
trifluoperazine	1440112	1.75032e+06	1.44529e+06	504798	CPD-7051 [ C21 H25 F3 N3 S, tgt=69.63, overall=69.63 ]			(409.1798, 28298.96)(410.1832, 3732.27)(413.174, 1482.19)(409.17853, 31713.209)(410.18207, 5994.701)(411.1839, 179.59)(426.84924, 6455.183)(427.61847, 1079.8547)(431.1504, 766.7134)
3,5-dihydroxy-6,7-didehydro-12'-apo-&beta;-caroten-12'-al / 5,6-epoxy-3-hydroxy-12'-apo-&beta;-caroten-12'-al	2.83972e+06	2.49766e+06	3015118	2.76953e+06	CPD-7198 [ C27 H36 O3, tgt=74.10, overall=74.10 ]			(409.26886, 31635.955)(410.2717, 6706.304)
(2&beta;OH)-gibberellin<sub>28</sub>	1.0379e+06	671408	1.00723e+06	776678	CPD-6226 [ C20 H23 O9, tgt=53.28, overall=53.28 ]			(411.1581, 92.35)(425.17343, 52833.605)(426.17606, 8231.884)(427.1779, 940.6455)(407.16196, 11459.724)(408.15927, 2976.5166)
4&alpha;-carboxy-5&alpha;-cholesta-8,24-dien-3&beta;-ol	1	1	1	61716.6	CPD-4702 [ C28H43O3, tgt= ]			(412.3168, 4255.7275)(414.33215, 1257.96)(414.33228, 1578.665)
linustatin	1.23166e+06	1.08323e+06	1.12326e+06	965652	CPD-14594 [ C16 H27 N O11, tgt=64.29, overall=64.29 ]			(413.17282, 3104.7673)(409.17862, 35758.613)(410.18234, 5780.0146)(411.1839, 193.4)(415.15085, 449.94165)
furcatin	266776	260062	213124	183802	CPD-14703 [ C20 H28 O10, tgt=15.18, overall=15.18 ]			(413.1731, 1919.774)(413.17194, 2861.0513)(447.21655, 191.625)(429.16785, 6813.89)(429.20267, 1263.849)
adlupulone /lupulone	74647.8	79964.5	56120	97448.8	CPD-19790 [ C26 H37 O4, tgt= ]			(413.2972, 12204.144)(414.30054, 1720.5209)
4&alpha;-carboxy-5&alpha;-cholesta-7,24-dien-3&beta;-ol	154975	26214.1	110158	61716.6	CPD-12928 [ C28 H43 O3, tgt=59.39, overall=59.39 ]			(413.95023, 2740.9597)(414.33215, 1257.96)(414.3306, 1602.1824)(416.3454, 566.73)(445.3438, 279.02)(428.34802, 6721.005)(429.3503, 344.26)
&beta;-peltatin / (-)-epipodophyllotoxin / 5'-demethoxy-6-methoxypodophyllotoxin / podophyllotoxin	1.30393e+06	1271272	1.90988e+06	1.76505e+06	CPD-8960 [ C22 H22 O8, tgt=26.59, overall=26.59 ]			(414.1461, 57463.62)(415.14883, 8899.716)(416.1498, 448.81)
solasodine	713407	584827	1.30162e+06	908376	CPD-13080 [ C27 H43 N O2, tgt=68.49, overall=68.49 ]			(414.33154, 21503.578)(415.33423, 4696.3623)(416.34137, 1029.595)
2-methyl-6-geranylgeranyl-1,4-benzoquinol	9.12098e+06	4.37459e+06	6.12023e+06	5.95499e+06	CPD-11712 [ C27 H40 O2, tgt=55.77, overall=55.77 ]			(414.333, 376080.97)(415.33566, 100811.2)(416.34128, 801.13995)(401.27945, 19579.855)(402.2824, 4607.0127)
&delta;-tocotrienol	9.12098e+06	4.04379e+06	5.81997e+06	5.73099e+06	CPD-15839 [ C27 H40 O2, tgt=55.77, overall=55.77 ]			(414.33322, 422639.53)(415.3359, 113421.45)
4&alpha;-formyl-5&alpha;-cholesta-8,24-dien-3&beta;-ol	6.50421e+06	2.19136e+06	1.76905e+06	6925030	CPD-4580 [ C28 H44 O2, tgt=53.42, overall=53.42 ]			(414.3338, 412968.8)(415.3365, 110744.39)(416.34888, 420158.4)(417.35245, 115391.164)(418.35455, 13475.299)
4&alpha;-formyl-5&alpha;-cholesta-7,24-dien-3&beta;-ol	6.50421e+06	2.31289e+06	1.84034e+06	6925030	CPD-12927 [ C28 H44 O2, tgt=53.42, overall=53.42 ]			(414.3338, 412968.8)(415.3365, 110744.39)(416.34888, 420158.4)(417.35245, 115391.164)(418.35455, 13475.299)(430.3697, 15689.486)(431.3725, 729.862)
noscapine	640613	395184	422668	1.49339e+06	CPD-14834 [ C22 H23 N O7, tgt=35.54, overall=35.54 ]			(414.34686, 37738.992)(415.14798, 7072.904)(414.25925, 57351.45)(415.3746, 8832.359)(431.1822, 7385.413)(413.17273, 3147.93)(440.14413, 2614.9631)(419.94788, 1754.3573)
&gamma;-tocotrienol	671017	813177	255406	119933	CPD-15838 [ C28 H42 O2, tgt=28.49, overall=28.49 ]			(414.4554, 1491.925)(416.3464, 452.515)(415.2787, 2037.1649)(428.98474, 28037.107)(430.27707, 9524.356)(431.3722, 657.0775)(411.3414, 3826.83)
dalcochinin	32934.5	56574.6	1	1	CPD-9711 [ C23 H24 O7, tgt=29.34, overall=29.34 ]			(415.15192, 754.324)(417.17026, 618.13007)(415.15332, 746.985)(413.17334, 6595.732)(440.14346, 2318.066)(422.134, 575.11)
&beta;-tocotrienol / 2,3-dimethyl-6-geranylgeranyl-1,4-benzoquinol	516043	745814	145921	58217.8	CPD-15837 [ C28 H42 O2, tgt=28.49, overall=28.49 ]			(416.3247, 378.04)(417.3326, 3211.0134)(429.1317, 32956.04)(430.36972, 10439.908)(431.3722, 657.0775)(411.3414, 3826.83)
	516043	745814	145921	58217.8	CPD-15834 [ C28 H42 O2, tgt=28.49, overall=28.49 ]			(416.3247, 378.04)(417.3326, 3211.0134)(429.1317, 32956.04)(430.36972, 10439.908)(431.3722, 657.0775)(411.3414, 3826.83)
(22&alpha;)-hydroxy-campest-4-en-3-one / 24-alkyl sterol 2 / 26-hydroxy-27-methyl-zymosterol / 4&alpha;-hydroxymethyl-5&alpha;-cholesta-7,24-dien-3&beta;-ol / 4&alpha;-hydroxymethyl-5&alpha;-cholesta-8,24-dien-3&beta;-ol	46050000	44887500	47962500	48762500	CPD-3945 [ C28 H46 O2, tgt=34.19, overall=34.19 ]			(416.3482, 914599.6)(417.35156, 260401.75)(421.34717, 375.66998)
(22R,23R)-22,23-dihydroxycampesterol / 24-epicathasterone / 3-dehydro-6-deoxoteasterone / cathasterone	46050000	44262500	47962500	47087500	CPD-12495 [ C28 H48 O3, tgt=53.60, overall=53.60 ]			(416.34857, 932985.7)(417.3519, 263451.6)(418.35385, 31552.031)(419.35596, 1747.439)
1-oleoyl-<i>sn</i>-glycerol 3-phosphate	180275	150760	362938	318006	L-1-LYSOPHOSPHATIDATE [ C21 H39 O7 P, tgt=6.46, overall=6.46 ]			(417.23627, 3363.615)(457.22693, 526.51337)(417.23465, 7134.7573)(452.27194, 1464.0966)(435.245, 4524.085)
(20<i>R</i>,22<i>R</i>)-dihydroxycholesterol	2.21145e+06	2.51049e+06	2.05281e+06	2.58212e+06	20A-20B-DIHYDROXY-CHOLESTEROL [ C27H46O3, tgt= ]			(418.3537, 41126.31)(419.3559, 2303.6191)(418.3555, 41484.58)(419.35764, 2248.7537)
miconazole	1	1	44651.4	23508.2	CPD-4501 [ C18 H14 Cl4 N2 O, tgt= ]			(418.9798, 1973.15)(419.9805, 411.53)(420.9786, 864.21)(402.9812, 407.52)(423.0031, 11676.054)(439.30673, 6173.939)(441.9668, 2177.31)(442.965, 2660.9)
3-<i>O</i>-aceylpapaveroxine / narcotine hemiacetal	26141.6	46390.1	100116	27071.6	CPD-14832 [ C22 H25 N O7, tgt= ]			(419.1854, 355.99)(398.14978, 6771.4766)(401.17383, 1658.96)(419.89673, 778.57715)(420.1834, 441.73)(398.15054, 7893.8516)(399.1519, 340.67)
(-)-deoxypodophyllotoxin	26141.6	11551	59135.8	27071.6	CPD-8958 [ C22 H22 O7, tgt= ]			(419.8078, 725.7538)(420.1834, 441.73)(398.15054, 7893.8516)(399.1519, 340.67)
2-phenylethyl 6-<i>O</i>-&beta;-<i>D</i>-xylopyranosyl-&beta;-<i>D</i>-glucopyranoside	324421	244808	164034	111434	CPD-14735 [ C19 H28 O10, tgt=32.62, overall=32.62 ]			(419.84933, 1797.1239)(420.51578, 1836.205)(398.9902, 3670.0425)(401.17563, 1727.0732)(419.1875, 811.91003)(420.1835, 951.64)(399.446, 3873.1794)(435.21277, 732.155)(439.15176, 10660.992)(440.15323, 1350.4545)
GDP / adenosine 3',5'-bisphosphate / GDP group	249406	346510	309506	301205	GDP [ C10 H12 N5 O11 P2, tgt=43.72, overall=43.72 ]			(423.00296, 8013.817)(444.98093, 7350.427)
4-methylumbelliferone 6'-O-malonylglucoside	1	1	58940.1	1	CPD-13688 [ C19 H19 O11, tgt= ]			(423.12024, 13675.415)(424.12305, 925.01)
1-stearoyl-<i>sn</i>-glycerol 3-phosphate	238203	199593	208777	179828	CPD0-2113 [ C21 H41 O7 P, tgt=26.53, overall=26.53 ]			(423.26944, 1751.2183)(423.2682, 8215.625)(454.28693, 13018.666)(455.28964, 1287.336)(463.25986, 1626.77)
folate	1395281	2.11333e+06	656042	900258	FOLATE [ C19 H19 N7 O6, tgt=55.18, overall=55.18 ]			(425.1382, 1816.9888)(426.139, 664.16)(425.15005, 1535.2368)(459.17786, 39712.348)(460.1802, 5946.6313)(461.1772, 486.89404)(441.16962, 47416.582)(442.17227, 7269.918)(443.1749, 316.17)
7,8-dihydrofolate monoglutamate	1.51712e+06	2.11333e+06	1.59636e+06	1.93021e+06	DIHYDROFOLATE [ C19 H19 N7 O6, tgt=55.18, overall=55.18 ]			(425.1382, 1816.9888)(426.139, 664.16)(425.15005, 1535.2368)(459.1782, 42535.543)(460.1806, 6469.566)(461.17606, 537.53503)(441.16846, 44569.465)(442.17117, 6864.76)(443.17865, 345.64502)
&beta;-D-glucopyranosyl abscisate	932503	727724	494632	443688	CPD-7727 [ C21 H30 O9, tgt=33.56, overall=33.56 ]			(426.1995, 1547.5634)(429.20303, 1990.7767)(409.17862, 27058.445)(410.18234, 5841.2446)(411.1839, 173.4)(426.40244, 6691.6875)(427.2208, 1186.884)(449.19028, 3261.323)(434.9443, 2201.1387)
(22&alpha;)-hydroxy-cholestanol	1	12789.1	1	1	CPD-7192 [ C27 H48 O2, tgt= ]			(428.3479, 6725.59)(429.3503, 344.26)
4'-hydroxy-rot-2'-enonate / 5'-hydroxy-rot-2'-enonate	137582	178801	117478	35745.5	CPD-9535 [ C23 H23 O7, tgt=12.24, overall=12.24 ]			(429.1675, 10062.3125)(430.1715, 500.02)(413.1726, 2797.1052)
sophoraflavanone G	2.16861e+06	403295	1.06595e+06	1.60601e+06	CPD-9441 [ C25 H28 O6, tgt=62.32, overall=62.32 ]			(429.20367, 1590.862)(409.17804, 521.296)(425.40894, 16310.454)(426.41165, 2655.54)(430.22247, 2508.7178)(447.96362, 9508.149)(449.19043, 1769.35)(432.40408, 5430.552)(430.171, 310.03)
4&alpha;-hydroxymethyl-4&beta;-methyl-5&alpha;-cholesta-8,24-dien-3&beta;-ol / 4&alpha;-hydroxymethyl-ergosta-7,24(24<sup>1</sup>)-dien-3&beta;-ol	1.30392e+06	2.84136e+06	1.98713e+06	3.0508e+06	CPD-4575 [ C29 H48 O2, tgt=49.00, overall=49.00 ]			(429.36786, 44772.28)(430.3707, 11468.525)(431.37164, 775.815)(436.0233, 4666.947)
&alpha;-tocopherol	229309	499777	426560	649211	ALPHA-TOCOPHEROL [ C29 H50 O2, tgt=29.10, overall=29.10 ]			(430.3715, 16898.684)(431.37427, 963.28)(435.35452, 44762.727)(436.35715, 8893.38)
S-adenosyl-1,8-diamino-3-thiooctane	368212	270849	368292	279712	CPD0-1375 [ C18 H33 N7 O3 S, tgt=39.50, overall=39.50 ]			(432.23236, 18897.062)(433.23572, 3662.4653)(432.23404, 16376.398)(433.23767, 2927.7917)(451.27777, 2529.3794)
1-(18-hydroxyoleoyl)-<i>sn</i>-glycrol 3-phosphate	439558	319708	441655	135993	CPD-17372 [ C21 H39 O8 P, tgt=47.49, overall=47.49 ]			(432.23248, 18804.463)(433.2359, 3604.33)(451.2772, 2778.0215)(452.2806, 341.79)
3-dehydro-6-hydroxyteasterone / teasterone / typhasterol	245942	295793	224808	254828	CPD-17422 [ C28 H48 O4, tgt=24.54, overall=24.54 ]			(432.34167, 15322.093)(433.34464, 2902.298)
phylloquinone	292658	354750	264194	302023	2-METHYL-3-PHYTYL-14-NAPHTHOQUINONE [ C31 H46 O2, tgt=49.70, overall=49.70 ]			(432.34167, 15901.064)(433.34464, 3016.1165)
&beta;-peltatin-A methyl ether / wortmanin	160916	184306	114500	91760.1	CPD-8961 [ C23 H24 O8, tgt=45.30, overall=45.30 ]			(433.16504, 3146.2876)(429.1665, 8514.063)(429.16812, 9623.05)(430.93002, 3612.4622)(431.18304, 4969.626)(457.1634, 2144.1924)
2,4-diamino-6-ethyl-5,3'-(2-cyclohexylphenoxy)prop-1'-yloxypyrimidine	175451	146505	329494	293809	CPD0-1584 [ C23 H32 N4 O3, tgt=2.38, overall=2.38 ]			(435.2453, 6065.058)(417.23477, 6788.8945)
16-feruloyloxypalmitate	11606	63197.2	1	1	CPD-11591 [ C26 H39 O6, tgt=11.31, overall=11.31 ]			(435.2683, 780.62)(470.2761, 12357.36)(471.2775, 1134.0901)
<i>N</i>-acetyl-<i>S</i>-geranylgeranyl-L-cysteine	185612	118989	1	29162.2	CPD-12753 [ C25 H40 N O3 S, tgt= ]			(435.28326, 6308.172)(436.28632, 1717.66)(457.27396, 1019.33997)
(22R,23R)-22,23-dihydroxy-campest-4-en-3-one	5.81032e+06	2.33804e+06	1.87813e+06	6.92518e+06	CPD-12496 [ C28 H46 O3, tgt=53.42, overall=53.42 ]			(435.35233, 2269.1736)(414.33383, 415360.38)(415.33652, 111420.13)(416.34897, 422876.38)(417.3525, 116015.66)(418.35458, 13568.329)(448.37885, 2219.066)(430.36978, 13132.857)(431.3725, 638.692)
3-dehydroteasterone	168772	237007	68938.1	279160	CPD-718 [ C28 H46 O4, tgt=36.36, overall=36.36 ]			(435.35324, 1407.0734)(447.37662, 12027.184)(448.38004, 2167.3096)
moiramide B	191446	231183	214215	219862	CPD0-1598 [ C25 H31 N3 O5, tgt=69.03, overall=69.03 ]			(436.2126, 525.242)(436.2344, 527.5)(458.20428, 7343.2183)(459.21576, 1602.5558)
geranyl 6-<i>O</i>-&beta;-<i>D</i>-xylopyranosyl-&beta;-<i>D</i>-glucopyranoside / linalyl 6-<i>O</i>-&alpha;-<i>L</i>-arabinopyranosyl- &beta;-<i>D</i>-glucopyranoside / linalyl 6-<i>O</i>-&beta;-<i>D</i>-xylopyranosyl-&beta;-<i>D</i>-glucopyranoside	1.1641e+06	1.11635e+06	1.50309e+06	1.43125e+06	CPD-14731 [ C21 H36 O10, tgt=58.25, overall=58.25 ]			(436.2348, 1168.04)(466.25995, 85462.82)(467.26233, 15727.35)(468.26373, 1826.9463)(449.2483, 368.67)(471.21423, 11197.676)(472.21793, 1464.0249)
(R)-amygdalin	647655	1.09255e+06	828644	2.28381e+06	CPD-1125 [ C20 H27 N O11, tgt=40.80, overall=40.80 ]			(439.26172, 5599.173)(440.1445, 1843.2047)(440.9637, 1022.204)(457.32144, 33106.848)(458.25052, 4989.174)(459.1561, 133.69)(459.17712, 8443.224)(460.1812, 491.98495)
6-deoxotyphasterol	1	1	184481	1	CPD-720 [ C28 H50 O3, tgt= ]			(439.35773, 7567.2773)(440.36066, 652.8875)
8'-apo-&beta;-carotenal	1	1	90574.8	43377.5	CPD-7206 [ C30H40O, tgt= ]			(439.3585, 3519.945)(440.3608, 718.0967)(421.34787, 1225.625)
demethylphylloquinol	154743	1	201938	181678	CPD-12830 [ C30 H46 O2, tgt=32.02, overall=32.02 ]			(439.35907, 8681.775)(440.36066, 911.5)(421.3479, 1206.0566)(421.3494, 1425.23)(441.04053, 3789.1973)(440.37512, 1828.355)
(22&alpha;)-hydroxy-campesterol	1	1	109895	130076	CPD-3943 [ C28 H48 O2, tgt=15.20, overall=15.20 ]			(439.35913, 6361.0776)(440.36053, 574.78)(421.3483, 862.8)
avenastenone	1	1	86687.8	77001	CPD-12915 [ C29 H46 O, tgt=31.55, overall=31.55 ]			(439.36008, 1667.33)(415.84097, 10036.895)(416.84625, 1343.16)(421.3487, 367.83)
4&alpha;,14&alpha;-dimethyl-9&beta;,19-cyclo-5&alpha;-cholest-24-en-3-one / 4&alpha;-methyl-5&alpha;-ergosta-8,14,24(28)-trien-3&beta;-ol / 4,4-dimethyl-5-&alpha;-cholesta-8,14,24-trien-3-&beta;-ol / 4,4-dimethyl-cholesta-8,12,24-trienol / 5-dehydroavenasterol / 7-dehydroporiferasterol	1	1	1	77001	CPD-12920 [ C29 H46 O, tgt=31.55, overall=31.55 ]			(439.36008, 1667.33)(416.3482, 10395.547)(417.3511, 1498.47)(421.3487, 367.83)
&beta;-tocopherol / &gamma;-tocopherol / (22<i>S</i>,24<i>R</i>)-22-hydroxy-5&alpha;-ergostan-3-one / 2,3-dimethyl-6-phytyl-1,4-benzoquinol / 6-oxocampestanol	1	1	1	130076	BETA-TOCOPHEROL [ C28 H48 O2, tgt=15.20, overall=15.20 ]			(439.3602, 5709.23)(421.3492, 734.72003)
(<i>Z</i>)-1-(glutathion-<i>S</i>-yl)-<i>N</i>-hydroxy-2-phenylethan-1-imine	701714	1.03078e+06	759521	836063	CPD-12384 [ C18 H23 N4 O7 S, tgt=67.09, overall=67.09 ]			(440.1426, 1206.0325)(422.13193, 135.3875)(423.13498, 1096.915)(457.30667, 20870.574)(458.1658, 2687.7993)(439.2462, 5175.5073)(440.14578, 1554.2365)
11-oxo-&beta;-amyrin /30-oxolanosterol / 4&alpha;-formyl,4&beta;,14&alpha;-dimethyl-9&beta;,19-cyclo-5&alpha;-cholest-24-en-3&beta;-ol /4&alpha;-formyl-stigmasta-7,24(24<sup>1</sup>)-dien-3&beta;-ol / betulinic aldehyde / oleanolic aldehyde / ursolic aldehyde	1	1	86387.5	1	CPD-13667 [ C30 H48 O2, tgt= ]			(440.36066, 921.5225)(441.3728, 4617.025)
(24<i>R</i>)-24-methylcycloarta-25-en-3-&beta;-ol / 24-methylenecycloartanol / 4&alpha;,14&alpha;-dimethyl-porifersta-8,25(27)-dienol	1	1	89944.4	76657.5	24R-24-METHYLCYCLOARTA-825-DIEN-3-BET [ C31 H52 O, tgt= ]			(440.4041, 10123.01)(441.40698, 849.23)
&Delta;<sup>24-25</sup>-sitosterol / 14-demethyllanosterol / 24-methylidenelophenol / 4&alpha;,14&alpha;-dimethyl-5&alpha;-cholesta-8,24-dien-3&beta;-ol / 4&alpha;,14&alpha;-dimethyl-9&beta;,19-cyclo-5&alpha;-cholest-24-en-3&beta;-ol / 4&alpha;-methyl-5&alpha;-ergosta-8,24-dien-3&beta;-ol / avenasterol / isofucosterol / porifersta-5,7-dienol / porifersta-7,25(27)-dienol / porifersta-8,25(27)-dien…	11650000	11475000	12150000	1.0325e+07	CPD-4142 [ C29 H48 O, tgt=58.26, overall=58.26 ]			(441.3739, 436.10248)(417.35187, 333515.2)(418.3538, 39991.133)(419.3559, 2228.2979)
salicortin	52240.8	1	57215.9	61707.8	CPD-13173 [ C20H24O10, tgt= ]			(442.1711, 9937.785)(443.1763, 896.25)(429.1691, 685.5075)
heliocide B1 / heliocide B2 / heliocide B3 / heliocide B4	85513.4	142191	118304	309030	CPD-9745 [ C26 H31 O5, tgt=28.38, overall=28.38 ]			(444.25226, 648.405)(447.2168, 3093.5105)(448.2216, 238.22)(429.20544, 11442.617)(430.20996, 1171.3845)
(-)-<i>ent</i>-copalyl diphosphate / (+)-copalyl diphosphate / (13E)-labda-7,13-dien-15-yl diphosphate / 2-<i>cis</i>,6-<i>trans</i>,10-<i>trans</i>-geranylgeranyl diphosphate / geranylgeranyl diphosphate	172496	104917	103612	237678	ENT-COPALYL-DIPHOSPHATE [ C20 H33 O7 P2, tgt=43.86, overall=43.86 ]			(447.15656, 654.77)(429.16702, 9400.957)(430.171, 454.18332)(432.1223, 3718.9595)(433.1642, 3137.4487)(448.18976, 22049.172)(449.19205, 3245.99)(457.16263, 2134.6218)
9&alpha;-copalyl diphosphate	286992	247166	337318	308595	CPD-8719 [ C20 H33 O7 P2, tgt=43.86, overall=43.86 ]			(447.15768, 975.56006)(429.16748, 8902.977)(430.171, 454.18332)(432.9561, 4480.388)(433.1642, 3137.4487)(448.18875, 22596.744)(449.19116, 3467.8997)(457.163, 2084.0688)
4&alpha;-carboxy-4&beta;-methyl-5&alpha;-cholesta-8,24-dien-3&beta;-ol	1	277510	1	1	CPD-4577 [ C29 H45 O3, tgt=17.32, overall=17.32 ]			(447.3274, 28916.18)(448.32986, 3137.73)
(13<i>E</i>)-8&alpha;-hydroxylabd-13-en-15-yl diphosphate	343551	319102	565755	420968	CPD-12745 [ C20 H35 O8 P2, tgt=24.59, overall=24.59 ]			(447.34586, 3469.5066)(449.1888, 2362.35)(448.1882, 20134.174)(449.19058, 2930.1992)
(-)-epicatechin-3-<i>O</i>-gallate	1	1	231694	44837.1	CPD-16530 [ C22 H18 O10, tgt=47.29, overall=47.29 ]			(448.1077, 4825.2153)
(glutathion-<i>S</i>-yl)(1<i>H</i>-indol-3-yl)acetonitrile	429384	502134	440846	468806	CPD-12634 [ C20 H22 N5 O6 S, tgt=17.93, overall=17.93 ]			(448.11154, 9283.0)(481.16235, 9735.305)(482.1652, 356.47)(465.0971, 23528.027)(466.09998, 3703.3313)
aureusidin 6-<i>O</i>-glucoside / cyanidin-3-<i>O</i>-&beta;-D-galactoside / luteolin 7-<i>O</i>-&beta;-D-glucoside	96937.8	234134	1	124628	CPD-8634 [ C21 H20 O11, tgt=23.00, overall=23.00 ]			(448.2593, 11778.603)(449.27225, 2335.7468)(450.106, 338.19)(448.11124, 9828.214)(449.11017, 1743.218)(450.1057, 745.0)
<i>N</i>-(&beta;-glucosyl)-(oxindol-3-yl)acetyl-aspartate	208851	158806	61575.6	222332	CPD-9602 [ C20 H22 N2 O11, tgt=40.94, overall=40.94 ]			(448.28082, 8962.69)(449.15714, 1857.9086)(450.1043, 628.80505)(471.1571, 1449.1068)
C-hexosyl-luteolin / cyanidin 5-<i>O</i>-&beta;-D-glucoside / cyanidin-3-<i>O</i>-&beta;-D-glucoside / isoorientin / kaempferol 3-<i>O</i>-&beta;-D-galactoside / kaempferol 3-<i>O</i>-&beta;-D-glucoside / kaempferol 7-<i>O</i>-glucoside / orientin / quercetin 3-<i>O</i>-rhamnoside	152171	190081	49567.5	152035	CPD-12657 [ C21 H19 O11, tgt=11.76, overall=11.76 ]			(448.36667, 9249.987)(449.15543, 2231.271)(450.1033, 2699.4111)(448.1111, 10058.891)(449.11017, 2015.9501)
3-<i>C</i>-glucosyl-2,4,4',6-tetrahydroxydibenzoylmethane / 6-<i>C</i>-glucosyl-2-hydroxynaringenin	56216	67619.4	1	1	CPD-15088 [ C21 H21 O11, tgt=25.08, overall=25.08 ]			(449.10342, 5462.5186)(450.1043, 3638.2124)(471.15616, 1321.8368)
5,6,7,8-tetrahydrofolate	106075	311772	135731	182182	THF [ C19 H21 N7 O6, tgt=54.91, overall=54.91 ]			(449.17346, 1520.1559)(443.183, 14179.262)(444.18628, 1613.8264)
dihydrogeranylgeranyl diphosphate	94540.2	123963	151490	133265	CPD-7002 [ C20 H35 O7 P2, tgt=40.44, overall=40.44 ]			(449.19034, 6827.532)(431.5305, 8297.126)(435.1793, 2620.5)(468.3618, 1594.1512)(454.22266, 8806.225)(476.0996, 2323.936)(475.6921, 1330.8816)(477.18796, 271.97)(457.58728, 5453.663)
<i>syn</i>-copalyl diphosphate	535607	409794	345995	314454	CPD4KF-4 [ C20 H36 O7 P2, tgt=24.41, overall=24.41 ]			(451.2018, 4926.733)(436.2114, 7493.5947)(437.2145, 430.6)(468.2354, 4281.354)(469.23843, 268.8)(450.22794, 1496.06)(473.1937, 15478.022)(474.19604, 1237.4513)(455.1839, 9354.809)(456.18683, 1801.0135)
tetrahydrogeranylgeranyl diphosphate	251893	95986.2	112886	78551.6	CPD-7003 [ C20 H37 O7 P2, tgt=54.70, overall=54.70 ]			(452.2059, 8952.28)(434.6194, 3312.1716)(452.2072, 7587.6323)(434.45035, 9546.049)(435.1994, 2184.45)(474.25372, 5243.6606)(459.17697, 5282.528)(460.1807, 704.765)
2,4-diamino-6-ethyl-5,3'-(2-trifluoromethyl-4-sulphonamidophenoxy)prop-1'-yloxypyrimidine / phlorizin	19234.6	34131.6	17439.2	1	CPD0-1594 [ C16 H20 F3 N5 O4 S, tgt=14.39, overall=14.39 ]			(453.16043, 9151.268)(454.16342, 346.7575)
4&alpha;-carboxy-4&beta;,14&alpha;-dimethyl-9&beta;,19-cyclo-5&alpha;-ergost-24(24<sup>1</sup>)-en-3&beta;-ol	39782.9	203165	56715.4	159608	CPD-12867 [ C31 H49 O3, tgt=17.70, overall=17.70 ]			(453.37262, 4584.98)(469.35962, 9324.936)(470.36276, 1258.328)(474.34988, 5412.6816)(475.3521, 769.815)
puromycin	226722	328655	135068	375738	PUROMYCIN [ C22 H30 N7 O5, tgt=47.29, overall=47.29 ]			(454.2228, 16648.238)(455.22552, 1411.6512)
7'-O-demethylcephaeline	531563	466065	457981	747699	CPD-14818 [ C27 H38 N2 O4, tgt=38.18, overall=38.18 ]			(454.28635, 13272.406)(455.2891, 1318.9766)(475.32056, 527.91)(458.3045, 5905.635)(478.2889, 42352.69)(479.29166, 8977.363)(463.26, 1664.65)
<i>N</i>-&beta;-D-glucosyl-(indol-3-yl)acetyl-L-aspartate	595647	505140	637861	542671	CPD-9568 [ C20 H22 N2 O10, tgt=42.36, overall=42.36 ]			(455.11127, 20733.709)(456.11398, 1746.0592)(457.11118, 1133.2899)
(-)-medicarpin-3-<i>O</i>-glucoside	47682	11548.2	12091.1	1	CPD-4122 [ C22 H24 O9, tgt=18.38, overall=18.38 ]			(455.18176, 976.05005)(433.1644, 6214.81)(455.12573, 11753.525)
methotrexate	212707	623923	17263.5	770460	CPD-6041 [ C20 H20 N8 O5, tgt=43.19, overall=43.19 ]			(455.44727, 3972.7153)(454.16324, 352.33)(439.15256, 4043.2136)(439.15338, 3094.075)(475.15332, 21363.883)(476.1561, 2428.2146)(460.141, 626.51)
FMNH<SUB>2</SUB>	76403.1	36855.6	70136	57912.1	FMNH2 [ C17 H21 N4 O9 P, tgt=5.29, overall=5.29 ]			(456.11313, 5203.5244)(457.1103, 2897.9543)(456.11505, 4913.4346)(457.11212, 2738.9707)
(<i>E</i>)-1-(glutathion-<i>S</i>-yl)-<i>N</i>-hydroxy-&omega;-(methylsulfanyl)pentan-1-imine	76403.1	36855.6	70136	57912.1	CPD-12393 [ C16 H27 N4 O7 S2, tgt=47.33, overall=47.33 ]			(456.1141, 5051.5728)(457.11127, 2814.677)
4&alpha;-carboxy,4&beta;,14&alpha;-dimethyl-9&beta;,19-cyclo-5&alpha;-cholest-24-en-3&beta;-ol	539356	683985	1.14361e+06	792319	CPD-12919 [ C30 H47 O3, tgt=26.51, overall=26.51 ]			(456.23587, 22256.9)(457.3649, 5463.4927)(439.3497, 6409.928)(440.36063, 871.43335)(456.36157, 10230.472)(457.3645, 8396.08)(439.35944, 6790.625)(440.3607, 584.63)(480.67444, 1876.1884)(481.3464, 1045.1001)(463.3411, 2687.882)
6-deoxocastasterone /6-hydroxyteasterone / 6-hydroxytyphasterol	186186	261938	410621	1	CPD-723 [ C28 H50 O4, tgt=23.37, overall=23.37 ]			(456.36166, 25758.525)(457.36438, 5518.1)
30-hydroxy-11-oxo-&beta;-amyrin	566907	636893	1.23489e+06	758922	CPD-13670 [ C30 H48 O3, tgt=60.13, overall=60.13 ]			(456.36194, 19990.523)(457.36487, 6250.1025)(439.35773, 10574.811)(440.36066, 911.5)(483.36035, 1616.685)(464.35107, 875.75006)
11-deoxoglycyrrhetinate / soyasapogenol E / ursolate	566907	636893	1135877	758922	CPD-14486 [ C30 H48 O3, tgt=60.13, overall=60.13 ]			(456.36194, 19990.523)(457.36487, 6250.1025)(483.36035, 1616.685)(464.35107, 875.75006)
soyasapogenol A	222334	317797	500578	333194	CPD-13251 [ C30 H50 O4, tgt=59.76, overall=59.76 ]			(456.36212, 26762.627)(457.36487, 5804.759)(483.36035, 1502.745)
4&alpha;-carboxy-stigmasta-7,24(24<sup>1</sup>)-dien-3&beta;-ol / betulinate / oleanolate	539356	667197	1.05033e+06	700470	CPD-12914 [ C30 H47 O3, tgt=26.51, overall=26.51 ]			(456.36215, 25356.658)(457.3649, 5463.4927)(439.33618, 3039.28)(456.36157, 10230.472)(457.3645, 8396.08)(483.36035, 1518.36)(464.35107, 873.16846)
folate	1	1	1	1803735	CPD-12826 [ C19 H17 N7 O6, tgt=31.98, overall=31.98 ]			(457.15146, 71011.984)(458.15396, 10568.183)(459.1561, 133.69)
5,10-methenyl-THF	635167	797506	675680	729238	510-methenyl-thf [ C20 H22 N7 O6, tgt=58.52, overall=58.52 ]			(457.16266, 26090.795)(458.30048, 3848.2288)(459.17728, 4884.5107)(460.18045, 561.855)(439.48245, 1298.2578)(440.1444, 2397.81)(459.1771, 9170.965)(439.1514, 17616.256)(440.15305, 2633.635)
5,10-methylenetetrahydropteroyl mono-L-glutamate	367084	302667	307516	247302	METHYLENE-THF [ C20 H21 N7 O6, tgt=37.58, overall=37.58 ]			(457.16318, 1703.8792)(441.1683, 1931.8)(473.19382, 14116.403)(474.19632, 993.88007)(455.1836, 9982.908)(456.186, 1393.6139)(480.16306, 430.34)
indol-3-ylmethyl-glutathione	136892	39208.8	59382.9	1	CPDQT-425 [ C19 H23 N4 O6 S, tgt=24.12, overall=24.12 ]			(458.57553, 24740.42)(454.1639, 354.55)(441.1097, 2687.7366)(439.15115, 8575.632)(440.15292, 931.915)
5-methyltetrahydropteroyl mono-L-glutamate	444070	541036	298275	1.04461e+06	5-METHYL-THF [ C20 H23 N7 O6, tgt=50.34, overall=50.34 ]			(458.61795, 14170.754)(460.18002, 704.3442)(439.1517, 10228.041)(440.1535, 1330.6174)(459.1795, 26295.713)(460.1827, 2461.466)(441.169, 895.75)(457.2013, 32283.873)(458.20422, 5937.6523)(459.21582, 1026.0575)
10-methyl-5,6,7,8-tetrahydropteroylglutamate	182486	135047	90998.2	1.00968e+06	CPD0-1255 [ C20 H23 N7 O6, tgt=50.34, overall=50.34 ]			(458.79977, 15846.916)(460.18002, 704.3442)(439.15152, 10623.626)(440.1535, 1330.6174)(459.17935, 24634.49)(460.18262, 1461.1766)(441.169, 895.75)(457.20255, 29479.498)(458.20572, 6009.4326)(459.21738, 1042.422)
eugenol <i>O</i>-&beta;-<i>D</i>-xylopyranosyl-(1->6)-<i>O</i>-&beta;-<i>D</i>-glucopyranoside	1.02464e+06	1.42572e+06	1.09918e+06	1.76267e+06	CPD-14737 [ C21 H30 O11, tgt=60.29, overall=60.29 ]			(459.17935, 45516.86)(460.18176, 6751.739)(461.17554, 596.66003)(441.09973, 23490.31)(442.17047, 5682.498)(443.181, 4774.177)(444.1855, 1358.1625)(441.16772, 34045.17)(442.17075, 4902.1934)(481.22287, 523.85004)(458.8737, 4668.518)(459.2147, 1122.178)(487.1714, 1234.82)
afrormosin-7-O-glucoside	1	109430	1	1	CPD-10077 [ C23 H24 O10, tgt=31.44, overall=31.44 ]			(460.14032, 1011.29504)(461.17465, 1259.935)
adenosine 5'-phosphoselenate	1	1	1	88792.6	CPD-13713 [ C10 H13 N5 O10 P Se, tgt=44.62, overall=44.62 ]			(460.96243, 2715.8433)(482.9387, 1493.8368)
mersalyl acid	482913	413047	359827	423156	CPD0-1313 [ C13 H15 Hg N O5, tgt=12.32, overall=12.32 ]			(465.097, 21538.688)(466.09995, 3247.7947)(489.0534, 766.87744)
1-(3,4-dihydroxyphenyl)-3-(3-<i>C</i>-glucosyl-2,4,6-trihydroxyphenyl)propane-1,3-dione	639300	691836	532348	621663	6C-Glc-2-hydroxyeriodictyol [ C21 H21 O12, tgt=29.77, overall=29.77 ]			(465.0971, 22158.473)(466.09998, 3475.0764)(450.10587, 952.2834)(448.10736, 7784.296)(449.10678, 1784.1028)(450.1043, 593.87)
6-methylsulfinylhexyl-glucosinolate	867062	805081	828508	425143	CPDQT-288 [ C14 H26 N O10 S3, tgt=61.13, overall=61.13 ]			(465.0971, 23062.963)(466.1, 3591.343)(489.0533, 492.40002)
3-(O-&beta;-glucosyl)-(2-oxindol-3-yl)acetyl-L-aspartate	421920	431720	384736	406138	3-O-BETA-GLUCOSYL-2-OXINDOLE-3-ACETYL- [ C20 H22 N2 O12, tgt=22.63, overall=22.63 ]			(465.0971, 23537.297)(466.09998, 3705.849)
bracteatin 6-<i>O</i>-glucoside	421920	431720	384736	406138	CPD-8635 [ C21 H20 O12, tgt=64.42, overall=64.42 ]			(465.0971, 23537.297)(466.09998, 3705.849)(450.10583, 905.2175)(448.24948, 6957.761)(449.31375, 1894.3422)(450.1033, 2341.6016)
glucobrassicin	487277	502134	443771	469473	CPD-1863 [ C16 H19 N2 O9 S2, tgt=16.67, overall=16.67 ]			(465.0971, 24045.24)(466.09998, 3810.9446)
19-<i>O</i>-&beta;-glucopyranosyl-steviol	68698.2	57952.1	52630.1	76615.5	CPD-14508 [ C26 H40 O8, tgt=45.45, overall=45.45 ]			(465.2564, 1177.16)(487.284, 1059.1458)(469.27374, 2244.4155)(498.30777, 6863.4365)(509.26587, 29026.77)
6-(methylsulfanyl)hexyl-glucosinolate	85567.4	86889.6	20101.2	185026	CPDQT-420 [ C14 H26 N O9 S3, tgt=15.37, overall=15.37 ]			(466.101, 3105.8647)(448.29013, 9543.117)(449.3083, 1513.187)(450.1043, 628.80505)
<i>N</i><sup>10</sup>-formyldihydrofolate	34754.2	1	27789.6	12728.9	CPD-14932 [ C20 H19 N7 O7, tgt= ]			(469.12704, 4396.104)(455.12592, 10900.18)(456.12854, 669.82)(457.1567, 710.96)(487.17566, 5667.5737)
glycyrrhetinate / gypsogenin	35426	208961	75721.1	144868	CPD-14483 [ C30 H45 O4, tgt=57.23, overall=57.23 ]			(469.3591, 9086.966)(470.36234, 1276.4985)
N10-formyl-2,4-diaminodideazafolate	296637	817806	411273	1	CPD0-1574 [ C22 H21 N5 O7, tgt=35.39, overall=35.39 ]			(471.15668, 464.94626)(471.15723, 487.67502)(485.55655, 14910.483)(486.4948, 1829.226)(487.206, 578.30005)(468.17844, 440.26)
myxothiazol	4.23353e+06	5.45297e+06	3.54624e+06	4.83991e+06	CPD0-1244 [ C25 H33 N3 O3 S2, tgt=49.81, overall=49.81 ]			(473.19556, 2285.4302)(474.20004, 188.595)(487.2088, 52812.387)(488.21146, 9226.381)(489.20847, 1039.5375)(505.2167, 4539.645)(495.17758, 4357.919)(496.18076, 584.2899)(487.20972, 53456.207)(488.21243, 9052.126)(489.20905, 1214.487)
cephaeline / vindoline	84187.5	1	84946.6	1	CPD-14816 [ C28 H40 N2 O4, tgt=27.42, overall=27.42 ]			(474.2853, 12565.688)(475.28775, 1225.4933)
16-sinapoyloxypalmitate	2.05393e+06	1.83347e+06	1.40274e+06	1.76854e+06	CPD-14765 [ C27 H41 O7, tgt=39.97, overall=39.97 ]			(478.28732, 40168.33)(479.2902, 8647.203)(478.28857, 31789.244)(479.29156, 6267.236)(496.87936, 81172.12)(497.336, 21026.838)(498.33777, 2078.7666)(483.26666, 2601.518)
deoxypumiloside	532088	258822	419135	252112	CPD-15043 [ C26 H28 N2 O8, tgt=27.22, overall=27.22 ]			(479.18234, 20663.266)(480.1854, 3049.1892)(481.1959, 485.34)(503.20074, 1209.6129)(485.1946, 48460.586)(501.1684, 7919.382)
(<i>E</i>)-1-(glutathion-<i>S</i>-yl)-<i>N</i>-hydroxy-&omega;-(methylsulfanyl)heptan-1-imine	1.02099e+06	1.09505e+06	977895	1.00288e+06	CPD-12399 [ C18 H31 N4 O7 S2, tgt=56.61, overall=56.61 ]			(479.1828, 19497.365)(480.1859, 2782.9966)(481.19702, 474.82666)
strictosamide	283868	551825	301062	339611	CPD-11775 [ C26 H30 N2 O8, tgt=44.97, overall=44.97 ]			(480.1791, 2823.5767)(481.197, 870.7066)(505.2173, 5163.086)(487.20892, 42310.434)(519.23505, 10350.7)(520.2387, 1654.5585)(503.2432, 634.405)(503.18457, 16563.883)(504.1878, 2978.5173)
phytyl diphosphate	928372	830501	1.13464e+06	1.32017e+06	PHYTYL-PYROPHOSPHATE [ C20 H39 O7 P2, tgt=57.53, overall=57.53 ]			(481.2233, 582.15076)(436.21286, 41588.047)(437.21555, 6670.356)(438.218, 297.775)(458.26724, 659.95667)
glycyrrhetaldehyde	186186	323952	410621	274742	CPD-14485 [ C30 H46 O3, tgt=19.01, overall=19.01 ]			(483.36035, 1390.8301)(439.3355, 4313.19)(456.36145, 21408.156)(457.36475, 7713.75)(461.31747, 5862.7935)(464.3504, 112.325)(456.363, 23028.875)(457.36572, 4810.7563)
(20<i>S</i>)-protopanaxadiol	1	1	1	29530.4	CPD-15449 [ C30 H52 O3, tgt=14.03, overall=14.03 ]			(483.3726, 12661.88)(484.3751, 280.19)
1-kestotriose / 6<sub>G</sub>-kestotriose / 6-kestotriose / fagopyritol A2 /fagopyritol B2 /maltotriose / raffinose	36243.9	46645.5	81801.9	43718.1	1-KESTOTRIOSE [ C18 H32 O16, tgt=30.81, overall=30.81 ]			(486.3583, 3873.2273)(489.16965, 959.88666)(504.18665, 4062.5022)(511.14984, 323.6275)
steviolmonoside	68698.2	46269	52630.1	76615.5	CPD-14502 [ C26 H40 O8, tgt=45.45, overall=45.45 ]			(487.284, 1059.1458)(469.27374, 2244.4155)(498.30768, 6901.2695)(509.26587, 29026.77)
medicagenic acid	1	190751	1	128313	CPD2GG-5240 [ C30H46O6, tgt= ]			(487.3368, 279.465)(489.3514, 195.96)(521.3765, 4805.856)(503.36627, 5241.945)(504.36972, 232.97249)(531.3277, 2814.65)
gypsogenate	1	43541.4	1	41699.2	CPD-9474 [ C30H44O5, tgt= ]			(487.3368, 398.54)(503.36646, 8506.635)(504.36972, 326.7525)
emetine	275016	288226	716276	551433	CPD-14817 [ C29 H42 N2 O4, tgt=53.03, overall=53.03 ]			(489.3504, 3667.9797)(501.35034, 7569.416)(502.35226, 184.82332)(505.31424, 18360.826)(506.31552, 2028.1523)(487.2841, 6812.2974)(488.28714, 887.21545)
6&alpha;-hydroxy-castasterone	225379	151083	226455	63299.1	CPD-724 [ C28 H50 O5, tgt=32.09, overall=32.09 ]			(489.35056, 10859.996)(490.35324, 1616.0675)
&beta;-D-glucosyl crocetin	574512	657002	450854	743118	CPD-8663 [ C26 H33 O9, tgt=47.57, overall=47.57 ]			(489.4503, 1183.2572)(472.48154, 13322.111)(473.30673, 1358.9211)(490.22205, 2239.3308)(512.2169, 342.35)(495.98187, 2996.498)(496.1826, 1556.1)
(indol-3-yl)acetyl-<i>myo</i>-inositol L-arabinoside	517599	844490	366152	275759	INDOL-YLACETYL-MYO-INOSITOL-ARABINOSIDE [ C21 H27 N O11, tgt=46.12, overall=46.12 ]			(494.6438, 380.24167)(457.16336, 2160.9802)(489.10938, 1991.5728)(473.1937, 3366.1633)
pumiloside	313096	326035	263202	407408	CPD-15042 [ C26 H28 N2 O9, tgt=31.46, overall=31.46 ]			(495.17722, 15912.785)(496.18027, 2209.5322)(536.16003, 13462.4375)(537.1605, 4738.904)
26-hydroxybrassinolide	6.21998e+06	5.07923e+06	6230987	5.7474e+06	CPD-12501 [ C28 H48 O7, tgt=87.54, overall=87.54 ]			(499.67856, 36544.09)(497.3391, 22946.25)(498.3409, 1959.21)(502.80884, 1991.2305)(503.36356, 2570.4438)(517.3753, 417.846)(520.33466, 205765.95)(521.36896, 49521.492)(522.3389, 7035.1494)
protopanaxatriol	236129	353663	521801	330143	CPD-15447 [ C30 H52 O4, tgt=27.05, overall=27.05 ]			(500.3877, 29988.535)(501.3896, 7287.9395)(483.36035, 1487.86)
ciceritol	67020.2	50839.8	16036.4	1	CPD-8049 [ C19 H34 O16, tgt=33.49, overall=33.49 ]			(501.16586, 8355.474)(501.9291, 5723.5073)(538.21985, 971.216)
(<i>22R,23R</i>)-28-homocastasterone	70919.5	162964	1	1	CPD-11827 [ C29 H50 O5, tgt=25.36, overall=25.36 ]			(501.35034, 7399.751)(502.35226, 175.43666)(489.3504, 3560.4075)
gossypol	110078	207864	167297	298322	CPD-9526 [ C30 H30 O8, tgt=23.86, overall=23.86 ]			(501.9098, 3000.701)(503.31854, 15915.662)(504.26657, 2178.289)(502.69678, 1392.2163)(538.2199, 1395.365)(519.3011, 9359.185)(520.23785, 1273.9775)
medicagenate	301212	206026	517790	439963	CPD-9483 [ C30 H44 O6, tgt=25.18, overall=25.18 ]			(504.31155, 71975.195)(505.31442, 16775.873)(506.3169, 1815.3246)(519.35956, 1303.3275)(523.36304, 1853.4625)(524.363, 2113.32)(501.34943, 6898.645)(502.35226, 155.16)(529.3077, 1486.384)
16-alpha-hydroxygypsogenate	92615.8	58070.6	1	439963	CPD-9476 [ C30 H44 O6, tgt=25.18, overall=25.18 ]			(504.3129, 72401.23)(505.31567, 16676.988)(506.3169, 1713.1361)(519.35956, 1303.3275)(523.36304, 1853.4625)(524.363, 2113.32)(501.34943, 6898.645)(502.35226, 155.16)(529.30945, 1454.168)
(<i>E</i>)-1-(glutathion-<i>S</i>-yl)-<i>N</i>-hydroxy-&omega;-(methylsulfanyl)nonan-1-imine	153097	174597	58038.2	327027	CPD-12405 [ C20 H35 N4 O7 S2, tgt=10.51, overall=10.51 ]			(507.17905, 4926.73)(491.2059, 23329.26)(525.23914, 10092.446)(526.24335, 987.21704)
2&alpha;-hydroxytaxusin / 7&beta;-hydroxytaxusin	350152	364938	266589	207507	CPD-14478 [ C28 H40 O9, tgt=50.44, overall=50.44 ]			(509.28003, 392.71835)(538.2996, 13404.581)(539.2999, 1181.2943)(540.2984, 242.08)
raucaffricine	152783	26946.4	42415.5	1	RAUCAFFRICINE [ C27 H32 N2 O8, tgt= ]			(512.2167, 3791.99)(515.23755, 2198.52)(519.2331, 6116.95)(534.2584, 6120.39)(535.2644, 390.99252)(535.20435, 25739.773)(536.2061, 3423.4)
(<i>E</i>)-1-(glutathion-<i>S</i>-yl)-<i>N</i>-hydroxy-&omega;-(methylsulfanyl)octan-1-imine	282096	282969	250368	269432	CPD-12402 [ C19 H33 N4 O7 S2, tgt=64.41, overall=64.41 ]			(512.21735, 1158.3843)(495.17746, 8014.3643)(496.18076, 1023.25146)(500.18176, 267.67)
24-epicathasterone-22-O-sulfate	209559	321200	322321	281609	CPD-11839 [ C28 H47 O6 S, tgt=45.89, overall=45.89 ]			(515.3261, 1991.2334)(497.3035, 418.73)(516.32544, 752.5017)(518.32495, 1840.9467)(495.32355, 1726.29)(529.3449, 4403.9326)(511.33447, 2611.3745)(535.2258, 14001.13)(535.6486, 1950.4761)
fusidate	8.67781e+06	3.74541e+06	5.76369e+06	4.08703e+06	CPD0-1606 [ C31 H47 O6, tgt=46.78, overall=46.78 ]			(516.7179, 6245.0273)(518.26337, 1468.3983)(520.3362, 175411.8)(521.33887, 43418.4)(498.69998, 3509.6123)(499.24185, 667.50696)(517.34625, 6265.4624)(518.34753, 1694.1201)(519.3587, 113.14)(499.32547, 495.65665)(502.69174, 921.0234)(503.3636, 2411.17)(517.3774, 1398.7065)(521.3328, 4171.3774)
(<i>22R,23R</i>)-28-homobrassinolide	59688.8	341686	77838.2	288935	CPDQT-326 [ C29H50O6, tgt= ]			(517.3465, 9743.351)(518.346, 1508.4286)(519.3588, 167.765)(501.5298, 642.7027)(505.34637, 106.06)
geranylfarnesyl diphosphate	428814	421620	366828	348866	ALL-TRANS-PENTAPRENYL-DIPHOSPHATE [ C25 H41 O7 P2, tgt=79.36, overall=79.36 ]			(519.2343, 2762.2483)(534.52185, 1334.5757)(537.2633, 987.46893)(538.22174, 20418.502)(539.2248, 4393.6396)(540.23627, 824.0138)
(+)-secoisolariciresinol monoglucoside	141411	350339	371064	276709	CPD-16683 [ C26 H36 O11, tgt=63.62, overall=63.62 ]			(525.23804, 7969.948)(526.24133, 1051.6521)(543.8899, 2439.186)(544.2656, 1387.89)(526.98413, 18241.357)(529.26605, 37951.02)(530.26587, 8936.361)
deacetylisoipecoside	334539	330685	218123	182862	DEACETYLISOIPECOSIDE [ C25 H34 N O11, tgt=56.40, overall=56.40 ]			(525.239, 9021.439)(526.24335, 813.67737)
castasterone 22-<i>O</i>-sulfate	31825000	30975000	32337500	31912500	CPD-19795 [ C28 H47 O8 S, tgt=33.21, overall=33.21 ]			(525.2813, 116889.98)(526.2889, 528181.5)(527.29095, 96497.59)(528.2898, 3503.608)
taxusin	1.23191e+06	777591	1.05544e+06	954162	CPD-13925 [ C28 H40 O8, tgt=57.46, overall=57.46 ]			(528.26086, 45953.254)(529.267, 50224.047)(530.26733, 4210.2812)
3,4,3',4'-tetradehydro-&beta;,&beta;-carotene	925285	582877	1.0387e+06	654621	CPD-7856 [ C40 H52, tgt=55.14, overall=55.14 ]			(532.4047, 31669.334)(533.40356, 7258.493)(534.4033, 1081.3429)(555.384, 1142.204)
3-&alpha;(<i>S</i>)-strictosidine	121039	145197	173550	25206.6	STRICTOSIDINE [ C27 H35 N2 O9, tgt=44.21, overall=44.21 ]			(534.2608, 4254.4897)(536.2634, 1742.905)(537.2616, 245.8)(534.46075, 3557.0078)(535.889, 3018.041)(537.261, 525.23364)(555.23486, 873.77)
&beta;-cryptoxanthin / 3-hydroxy-&epsilon;,&epsilon;-carotene / zeinoxanthin	3.95178e+06	2.48102e+06	4.53802e+06	4.29771e+06	CPD-7409 [ C40 H56 O, tgt=81.24, overall=81.24 ]			(534.4352, 16537.287)(535.4349, 2641.95)(571.3549, 77060.805)(572.39166, 28562.824)(573.3983, 9135.161)(574.4834, 1007.2)(575.48816, 105.33)(558.4647, 6044.315)(575.4211, 4304.6704)(576.42395, 1328.155)
isocryptoxanthin	4.02775e+06	2.70902e+06	4.53802e+06	4.29771e+06	CPD-17650 [ C40 H56 O, tgt=81.24, overall=81.24 ]			(534.4352, 16537.287)(535.4349, 2641.95)(571.49786, 67029.63)(572.39954, 26189.89)(573.4067, 8670.301)(574.4833, 1007.5011)(575.48816, 105.33)(558.4647, 6044.315)(575.4211, 4304.6704)(576.42395, 1328.155)(558.75464, 5843.7905)(558.4143, 1624.83)
ketoconazole	16133.2	304890	64996.9	1	CPD-4503 [ C26 H28 Cl2 N4 O4, tgt= ]			(536.15704, 15431.884)(537.1576, 6039.534)(538.15546, 3314.5225)(539.1548, 168.44249)
2'-hydroxy 3,6,7,4'-tetramethylquercetagetin 3'-<i>O</i>-&beta;-<i>D</i>-glucoside	593696	635024	646227	535039	CPD-14863 [ C25 H28 O14, tgt=16.71, overall=16.71 ]			(536.15765, 16068.326)(537.158, 6224.5786)(538.15594, 3579.0881)(539.1555, 192.48582)(536.1601, 14845.895)(537.1606, 5412.1714)(538.15845, 2983.0173)(539.15875, 141.075)
3,6,7,4'-tetramethylquercetagetin 3'-<i>O</i>-&beta;-<i>D</i>-glucoside / 3,7,3',4'-tetramethylquercetin 2'-<i>O</i>-&beta;-<i>D</i>-glucoside	1.7488e+06	1.88678e+06	1.93552e+06	1557400	CPD-14887 [ C25 H28 O13, tgt=35.19, overall=35.19 ]			(536.1582, 16684.16)(537.1587, 6575.5776)(536.1604, 16675.36)(537.1609, 6489.215)
(+)-sesaminol 2-<i>O</i>-&beta;-<i>D</i>-glucoside	343905	374456	394410	296710	CPD-14838 [ C26 H28 O12, tgt=9.59, overall=9.59 ]			(536.1584, 22138.043)(537.1605, 9747.98)(538.3559, 4843.061)(539.1553, 304.09555)
curcumin monoglucoside	593696	635024	646227	535039	CPD-6622 [ C27 H30 O11, tgt=37.58, overall=37.58 ]			(536.1585, 15648.114)(537.15894, 5945.3145)(538.1568, 3374.1887)(539.1559, 185.14145)
(-)-medicarpin-3-<i>O</i>-glucoside-6''-malonate	447673	237709	481249	535039	CPD-4123 [ C25 H25 O12, tgt=19.23, overall=19.23 ]			(536.15906, 15455.202)(537.1594, 5781.682)
pyropheophorbide <i>a</i>	656088	686182	673960	428349	CPD-10296 [ C33 H33 N4 O3, tgt=45.29, overall=45.29 ]			(536.90344, 8575.884)(536.8698, 2157.268)(537.25995, 2257.34)(537.2635, 7759.5405)(534.2848, 14870.834)(535.2873, 1956.7535)(557.3384, 2369.323)(538.4724, 4173.3735)(539.2232, 1745.87)
2&alpha;, 7&beta;-dihydroxytaxusin	1.03582e+06	1.77082e+06	1.43095e+06	1	CPD-14479 [ C28 H40 O10, tgt=45.72, overall=45.72 ]			(537.257, 7958.595)(539.49786, 799.6122)(540.5673, 1439.4857)(542.2935, 682.32)(537.264, 17891.03)(524.70685, 45518.316)(525.2804, 63866.41)(555.2873, 823.47003)(537.2966, 70426.84)(538.2992, 16967.98)(539.29926, 1872.8553)(540.2976, 378.06332)(559.24255, 564.7917)(541.5893, 2609.6482)(544.2642, 583.14)
18,19-dihydrostrictosidine	476778	311997	361590	348707	CPD-19533 [ C27 H37 N2 O9, tgt=42.45, overall=42.45 ]			(537.2632, 3284.1758)(519.2353, 2640.32)(535.5461, 4879.371)(534.2842, 4865.192)(535.2863, 1518.9286)(558.17896, 3533.2717)(538.3669, 14465.82)(539.22455, 3633.9077)(540.23663, 923.19904)
3-O-&beta;-D-glucoside digitoxigenin	2.47983e+06	3.18409e+06	2.44922e+06	2.22555e+06	CPD-10536 [ C29 H44 O9, tgt=41.41, overall=41.41 ]			(537.2965, 57193.992)(538.29913, 13615.529)(539.3002, 756.35596)(537.29724, 38266.652)(538.30005, 8774.094)(539.2999, 857.1399)(540.29846, 206.015)(559.35565, 9810.425)(560.35876, 2140.618)
apigenin 7-O-(6-malonyl-&beta;-D-glucoside) / malonylgenistin / pelargonidin-3-<i>O</i>-(6\-<i>O</i>-malonyl-&beta;-D-glucoside)"	169209	249575	333180	1	CPD-10318 [ C24 H21 O13, tgt= ]			(538.15576, 3837.3213)(539.1553, 194.67108)
6-O-methyl-N-deacetylisoipecoside	510242	479136	362904	390628	CPD-14812 [ C26 H36 N O11, tgt=36.59, overall=36.59 ]			(538.2218, 20044.756)(539.2248, 4315.77)(540.23627, 811.92334)(559.26416, 2509.4949)
brassinolide 22-O-sulfate	306091	280869	282303	164471	CPD-19794 [ C28 H47 O9 S, tgt=16.66, overall=16.66 ]			(541.2924, 18998.871)(542.2949, 2990.035)
digiproside / digitoxigenin 3-O-&beta;-D-quinovoside	7.55975e+06	4.34469e+06	7.50367e+06	1	CPD-10538 [ C29 H44 O8, tgt=47.77, overall=47.77 ]			(543.3584, 880.5485)(520.3339, 223431.05)(521.33636, 53717.664)(522.3381, 7525.676)
10-deacetylbaccatin III	338767	245844	308895	307000	10-DEACETYLBACCATIN-III [ C29 H36 O10, tgt=37.93, overall=37.93 ]			(544.26263, 865.228)(526.2191, 5857.57)(545.2346, 4087.2)(544.26697, 1026.3131)(555.2345, 1148.99)
dihydrozeatin-9-<i>N</i>-glucoside-<i>O</i>-glucoside	80821.6	111978	33328.8	68620.2	CPD-4621 [ C22 H35 N5 O11, tgt=22.45, overall=22.45 ]			(545.2483, 195.8)(568.2315, 7319.8467)(569.2343, 956.79456)
cholesteryl-&beta;-D-glucoside	4153601	2.84447e+06	4.9037e+06	3.02886e+06	CPD-556 [ C33 H56 O6, tgt=76.85, overall=76.85 ]			(551.41736, 792.26)(531.4021, 98149.46)(532.4046, 28080.73)(533.4035, 6252.997)(534.4033, 965.8057)(572.4621, 2301.7852)(553.3828, 20077.766)(554.3855, 4813.8887)(555.384, 1019.11176)
echinenone	2.01978e+06	1.60879e+06	1.26139e+06	2.86135e+06	CPD-7850 [ C40 H54 O, tgt=55.14, overall=55.14 ]			(551.4175, 1099.515)(532.40515, 46957.062)(533.4038, 11317.689)(534.4033, 1152.6556)(551.4181, 34366.227)(552.4209, 12082.049)(553.4239, 1315.4752)(571.86615, 3442.7366)(572.80554, 3357.5825)(571.46436, 17609.336)(572.46716, 5244.74)(573.4778, 4330.99)(574.48236, 761.505)(555.38434, 1430.3755)
BPH-674	1	1	1	56455	CPD-9929 [ C16 H16 K4 O6 P2, tgt=41.76, overall=41.76 ]			(551.8889, 3578.8398)(505.88715, 12382.971)(527.90027, 22852.21)(529.87573, 2915.8599)
hordatine A	1	37742.2	1	1	CPD-12232 [ C28H40N8O4, tgt= ]			(554.3622, 4607.69)(555.3598, 1446.93)
adhyperforin	4.84206e+06	1450950	2.15724e+06	195235	CPD-14533 [ C36 H54 O4, tgt=48.97, overall=48.97 ]			(556.4138, 116.46)(533.155, 6841.725)(533.4013, 5772.9)(557.4297, 2005.81)(568.5011, 9685.295)(569.54724, 3072.012)(570.60004, 290.52167)(551.41754, 37830.35)(552.4204, 13292.66)(553.4229, 1687.0109)(555.3821, 279.91)
(<i>22R,23R</i>)-28-homocastasterone 22-O-sulfate	184021	35427	1	151851	CPD-11828 [ C29 H49 O8 S, tgt=23.89, overall=23.89 ]			(559.2998, 384.16)(540.79486, 11751.106)(541.7961, 1881.98)(575.35, 1329.1575)(558.1453, 5151.746)(558.34326, 724.2601)
hydroxy-&beta;-zeacarotene	4556219	1.40669e+06	1933747	2.31816e+06	CPD-7420 [ C40 H58 O, tgt=61.09, overall=61.09 ]			(559.7366, 876.7273)(560.4623, 353.51)(572.54755, 27740.162)(573.6083, 13715.381)(574.4842, 17243.99)(577.4357, 6698.155)(578.4387, 1321.7)
protoporphyrin IX	315856	295970	277566	328131	PROTOPORPHYRIN_IX [ C34 H32 N4 O4, tgt=16.20, overall=16.20 ]			(560.251, 5096.918)(544.2683, 849.37006)(545.2347, 3598.252)
&beta;-sitosterol 3-O-&beta;-D-glucoside	8.32343e+06	5.2534e+06	2.31766e+06	3.94401e+06	CPD-11608 [ C35 H60 O6, tgt=61.99, overall=61.99 ]			(560.8232, 2289.7756)(562.356, 761.6545)(562.4462, 538.97)(561.4429, 2986.2349)(562.44574, 596.935)(595.4631, 1435.75)(596.46606, 461.92667)(600.08246, 30789.982)(601.8514, 13981.335)(603.42725, 2327.1233)(582.3168, 86903.16)(583.3195, 31532.057)(585.0564, 8473.532)(586.4364, 1023.5091)
desferrioxamine B	34180208	26516854	3.42038e+07	2.0675e+07	CPD-3764 [ C25 H49 N6 O8, tgt=45.06, overall=45.06 ]			(561.3702, 1337.1172)(543.3604, 3246.9214)(544.3629, 211.465)(545.3747, 5927.846)(546.37787, 644.20667)(579.788, 918669.25)(580.8238, 204690.36)(581.8638, 28206.332)(582.40857, 2320.6536)
brassicasterol 3-O-&beta;-D-glucoside	1.34088e+07	4.5892e+06	7.79381e+06	3.01761e+06	CPD-13084 [ C34 H56 O6, tgt=41.21, overall=41.21 ]			(561.39813, 158.17667)(543.3979, 1061.095)(565.41315, 2289.4065)(547.188, 6432.5835)(546.7464, 9398.23)(561.4432, 1892.645)(562.44666, 339.32498)(565.39954, 20833.715)(566.40216, 6916.229)(567.4117, 845.3833)
&beta;-zeacarotene / <i>all-trans</i> neurosporene /7,9,9'-<i>cis</i>-neurosporene / 9'-<i>cis</i>-neurosporene	289584	213863	326612	260997	CPD-7419 [ C40 H58, tgt=59.87, overall=59.87 ]			(561.44354, 11026.9)(562.4466, 1902.5157)
(<i>Z,Z</i>)-biliverdin-IX &alpha;	454589	479590	411244	412066	BILIVERDINE [ C33 H32 N4 O6, tgt=15.45, overall=15.45 ]			(563.23865, 20905.637)(564.2416, 4209.1675)(563.2414, 22583.15)(564.2442, 4648.353)
<i>all-trans</i>-&zeta;-carotene / 9,15,9'-tri-<i>cis</i>-&zeta;-carotene / 9,9'-di-<i>cis</i>-&zeta;-carotene	218365	217273	206440	217680	CPD1F-98 [ C40 H60, tgt=61.95, overall=61.95 ]			(563.4592, 10791.808)(564.4624, 2457.3264)
hyperforin	13250000	1.03638e+07	1.24435e+07	8.25534e+06	CPD-9635 [ C35 H52 O4, tgt=53.58, overall=53.58 ]			(564.40344, 1062.0201)(537.3892, 130018.67)(538.3918, 37530.246)(539.39026, 7617.698)(540.3903, 711.77124)(547.37726, 646.1963)
&gamma;-chaconine / &gamma;-solanine	2.37372e+06	1.22541e+06	722876	1818846	CPD-9216 [ C33 H54 N O6, tgt=45.42, overall=45.42 ]			(565.39526, 3331.9922)(566.39935, 500.60602)(566.4048, 4570.9443)(567.0763, 9146.731)(567.4138, 16068.922)(549.40814, 4829.9116)
3-<i>all trans</i>-hexaprenyl-4,5-dihydroxybenzoate	312462	204903	250583	186984	3-HEXAPRENYL-45-DIHYDROXYBENZOATE [ C37 H53 O4, tgt=55.09, overall=55.09 ]			(565.3962, 4618.676)(566.4633, 1527.6033)(567.4123, 6758.224)(546.7263, 6853.25)(545.37274, 2721.04)(545.3761, 842.27)(563.4115, 506.91333)(566.0685, 2643.8)(567.41345, 2472.305)(549.4087, 19383.104)(550.412, 3095.8462)(585.0568, 16050.451)(565.417, 2915.34)
adonirubin	4.90161e+06	4.59471e+06	4.22972e+06	5426524	CPD-7849 [ C40 H52 O3, tgt=51.28, overall=51.28 ]			(565.3984, 43133.63)(566.401, 16658.43)(567.4061, 1598.23)(581.3964, 7147.3203)(582.3957, 2541.298)(599.4146, 32553.787)(601.0674, 18222.041)(601.8327, 9237.114)(602.5141, 1039.1036)(587.36646, 247.97499)(582.04297, 66012.12)(583.04565, 23248.754)(584.051, 84072.11)(584.96094, 31327.535)(585.4414, 35282.34)(586.44574, 9730.498)
3,4,3',4'-tetradehydroisozeaxanthin / canthaxanthin	1.24266e+07	7.06753e+06	1.0432e+07	9.05405e+06	CPD-7854 [ C40 H52 O2, tgt=69.66, overall=69.66 ]			(565.8764, 5927.6636)(567.01764, 1055.262)(569.41125, 1755.4501)(583.4305, 475150.06)(584.4332, 177056.1)(585.4353, 31539.426)(586.43744, 2896.972)(588.1657, 5946.8467)(588.4431, 1221.4651)(565.41675, 5829.517)
3,6,7,2',4'-pentamethylquercetagetin 3'-<i>O</i>-&beta;-<i>D</i>-glucoside	1	23835.4	1	1	CPD-14864 [ C26 H30 O14, tgt=0.36, overall=0.36 ]			(566.1754, 4700.69)(595.1557, 1705.88)
3,4-didehydroisozeaxanthin	1.77375e+07	13574863	1.4325e+07	15612500	CPD-17651 [ C40 H54 O2, tgt=68.06, overall=68.06 ]			(567.42834, 24085.443)(568.4307, 7741.234)(549.4066, 202.88)(585.58014, 312812.5)(586.6504, 118244.85)(587.6564, 36212.55)(588.4601, 7061.3604)(589.4711, 2814.853)(567.66797, 19506.914)(568.67236, 6051.9067)(569.44763, 1152.9048)(571.4653, 22845.623)(572.46814, 6771.091)
baccatin III	104066	120916	41385.6	78946.1	BACCATIN-III [ C31 H38 O11, tgt=58.80, overall=58.80 ]			(568.2315, 6944.3096)(569.2343, 921.5166)
4,4-dihydroxy-&beta;,&beta;-carotene / lactucaxanthin / lutein / zeaxanthin	2154684	1	1	139404	CPD-20421 [ C40 H56 O2, tgt=53.98, overall=53.98 ]			(568.41876, 12986.799)(569.42535, 8332.58)(570.4288, 340.52664)(553.8237, 42723.785)(552.4206, 26758.943)(553.42303, 3234.2468)(587.6577, 16166.881)(590.4801, 9117.825)(591.4907, 305.825)(570.65717, 6450.418)(572.2682, 1216.482)(574.4819, 138.49)
isozeaxanthin	2760375	687300	1.84697e+06	3.02227e+06	CPD-7853 [ C40 H56 O2, tgt=53.98, overall=53.98 ]			(568.5136, 8156.8945)(569.72644, 4521.5967)(570.4288, 340.52664)(550.4112, 49.42)(554.0491, 27536.332)(552.4219, 17832.885)(553.42444, 1887.4565)(588.33936, 28496.055)(590.08295, 10816.729)(591.03326, 5289.6865)(592.0277, 1671.2845)(591.48474, 2093.5234)(592.4916, 245.595)(570.3921, 7564.588)(571.7039, 2647.792)(573.97925, 2174.0525)(573.4775, 2035.68)(574.4808, 345.85)(593.44, 2933.923)(594.4389…
1,2-dipalmitoyl-<i>sn</i>-glycerol	5.37973e+06	4.72412e+06	5.7272e+06	6332878	CPD66-34 [ C35 H68 O5, tgt=70.35, overall=70.35 ]			(573.48114, 67154.11)(574.48376, 23041.848)(575.4877, 3931.033)(576.49884, 211.00626)
solasodine 3-O-&beta;-D-glucoside	3.91676e+07	1.30443e+07	1.45505e+06	786117	CPD-13081 [ C33 H53 N O7, tgt=55.85, overall=55.85 ]			(577.3865, 258762.53)(577.38574, 111117.26)(578.39685, 246144.94)(579.4017, 132237.95)(580.4054, 99802.2)(581.40704, 12364.49)(559.3909, 1272.0332)(560.39056, 194.71002)(579.1632, 322460.0)(580.166, 109460.62)(580.4042, 87242.85)(581.40564, 10612.905)
haematoporphyrin IX	52632.4	65875.9	40397.1	30262.5	HAEMATOPORPHYRIN-IX [ C34 H36 N4 O6, tgt= ]			(579.2748, 2309.883)(619.2988, 2036.01)(596.3017, 8684.81)(597.305, 1606.4559)(601.2554, 1523.585)
stigmasterol 3-O-&beta;-D-glucoside	53950000	3.92625e+07	54937500	53275000	CPD-11606 [ C35 H58 O6, tgt=74.61, overall=74.61 ]			(579.40314, 1391776.4)(580.406, 285800.3)(581.40717, 36000.574)(582.4089, 2262.484)
3-<i>all trans</i>-hexaprenyl-4-hydroxy-5-methoxybenzoate	4.08487e+06	1.62192e+06	1.75784e+06	2.83689e+06	3-HEXAPRENYL-4-HYDROXY-5-METHOXYBENZOATE [ C38 H55 O4, tgt=88.40, overall=88.40 ]			(579.4198, 2316.7063)(580.4236, 1043.59)(557.4074, 1394.1249)(558.411, 821.20996)(579.4188, 653.8293)(559.39355, 1220.7151)(593.44666, 478.825)(599.40436, 75300.23)(600.40704, 29041.62)(601.41754, 9624.794)(602.4184, 767.655)(581.3998, 8067.557)(582.3972, 4082.318)
3,4'-dihydroxyechinenone	1.85269e+07	9.92802e+06	1.14052e+07	1.69259e+07	CPD-20428 [ C40 H54 O3, tgt=72.65, overall=72.65 ]			(583.1219, 22781.371)(584.41284, 10814.338)(585.43085, 7422.205)(566.6692, 8808.2)(567.7015, 5771.6206)(568.31555, 8084.966)(568.41693, 6049.0796)(583.4177, 75915.74)(584.4199, 28315.521)(565.4143, 8324.496)(566.41364, 2128.79)(567.4085, 110.87)(604.1227, 2242.945)(584.6101, 249985.4)(585.6143, 93642.89)(586.6182, 18402.316)(587.55884, 2273.269)(588.0485, 1086.122)(588.4433, 1321.5)
4',4'-dihydroxyechinenone / adonixanthin	2.38939e+06	3.76552e+06	2167660	2.6259e+06	CPD-20425 [ C40 H54 O3, tgt=72.65, overall=72.65 ]			(583.41046, 28015.8)(584.41284, 10814.338)(585.43085, 7422.205)(566.5655, 10537.026)(567.8364, 6234.166)(568.0415, 9694.846)(568.41693, 6049.0796)(583.41516, 41876.04)(584.41736, 16403.361)(605.4703, 709.61)(585.4424, 58918.14)(586.4475, 20628.61)(587.45276, 6610.816)(588.4556, 1170.4661)
4-hydroxyzeaxanthin / antheraxanthin / capsanthin	42625000	3.16625e+07	2.58625e+07	32312500	CPD-20422 [ C40 H56 O3, tgt=64.00, overall=64.00 ]			(584.4168, 663.64276)(567.4309, 23116.08)(568.43494, 7461.3193)(569.44696, 1411.7283)(570.4512, 376.2525)(585.446, 341257.6)(586.4488, 126671.78)(587.4546, 37208.977)(588.4596, 6660.466)(589.4712, 2638.3535)
3-hydroxyechinenone / 4'-hydroxyechinenone	1	1	1	15612500	CPD-7860 [ C40 H54 O2, tgt=89.24, overall=89.24 ]			(585.44775, 307389.38)(586.4505, 113010.7)(587.4564, 33173.562)(588.46173, 5916.222)(589.4734, 2717.255)(567.4319, 19777.273)(568.4365, 6211.955)(569.4495, 744.4033)(571.4663, 21517.57)(572.4693, 6327.9116)
	1	1	1	15612500	CPD-17652 [ C40H54O2, tgt= ]			(585.44775, 307389.38)(586.4505, 113010.7)(587.4564, 33173.562)(588.46173, 5916.222)(589.4734, 2717.255)(567.4319, 19777.273)(568.4365, 6211.955)(569.4495, 744.4033)(571.4663, 21517.57)(572.4693, 6327.9116)
5-methyl-tetrahydropteroyl-&alpha;-glutamylglutamate	62734.2	73897.9	27844.1	1	CPD0-1474 [ C25 H29 N8 O9, tgt=15.80, overall=15.80 ]			(591.1971, 6964.302)(592.20013, 549.2227)
5 &alpha;-carboxystrictosidine	2.97396e+06	3.20666e+06	2932416	826855	CPD-19534 [ C28 H34 N2 O11, tgt=49.38, overall=49.38 ]			(593.3026, 96273.5)(594.3049, 31635.404)(595.273, 5702.4434)
apigenin-7-<i>O</i>-gentiobioside / cyanidin-3-<i>O</i>-rutinoside / genistin 7-gentiobioside / isovitexin 7-<i>O</i>-galactoside/ isovitexin 7-O-glucoside / kaempferol 7-<i>O</i>-&beta;-D-glucoside-3-<i>O</i>-&alpha;-L-rhamnoside / kaempferol-3-<i>O</i>-&beta;-D-glucopyranoside-7-<i>O</i>-&alpha;-L-rhamnopyranoside /luteolin 7-<i>O</i>-neohesperidoside / pelargonidin 3,7-di-<i>O</i>-&beta;-<i>D<…	3.72868e+06	2.42799e+06	2460218	1.81528e+06	CPD-14824 [ C27 H30 O15, tgt=55.34, overall=55.34 ]			(595.1593, 64558.89)(596.16174, 15436.037)(597.1638, 2280.1016)(617.1398, 10902.067)(618.1424, 1895.1124)
isovitexin 2''-O-&beta;-D-glucoside / quercetin-3-rhamnoside-7-rhamnoside / rhamnosylisoorientin / vicenin-2 / vitexin 2''-O-&beta;-D-glucoside	1789886	1.16901e+06	1.18207e+06	875892	ISOVITEXIN-2-O-B-D-GLUCOSIDE [ C27 H29 O15, tgt=86.65, overall=86.65 ]			(595.1593, 64558.89)(596.16174, 15436.037)(597.1638, 2280.1016)(617.1398, 10902.067)(618.1424, 1895.1124)
pelargonidin 3-<i>O</i>-&beta;-D-p-coumaroylglucoside	1.88711e+06	1.23392e+06	1253024	934362	CPD-7384 [ C30 H25 O12, tgt=42.73, overall=42.73 ]			(595.1593, 64680.15)(596.16174, 15464.414)(597.1638, 2285.3088)
(<i>22R,23R</i>)-28-homobrassinolide 22-sulfate	49029.9	59435.5	50561.1	40386.8	CPD-11826 [ C29 H49 O9 S, tgt= ]			(596.30194, 8734.572)(597.30493, 1579.0826)(579.27606, 1817.9489)
(3S,3'S)-astaxanthin	873263	2.09922e+06	1.51994e+06	1.24684e+06	CPD-7847 [ C40 H52 O4, tgt=29.29, overall=29.29 ]			(598.6789, 33220.434)(599.7721, 14605.134)(600.86743, 7325.098)(600.6616, 3310.8176)(601.4137, 1392.64)(579.6454, 1912.0862)(582.399, 1299.23)(599.40826, 25948.445)(600.4098, 16357.875)(601.42065, 11958.997)(602.42224, 3225.665)(580.4732, 3542.9473)(582.7364, 2162.77)(615.73145, 6779.173)(616.7704, 968.8711)(617.54047, 3472.3606)(618.6271, 3257.7659)(597.69324, 27386.568)(599.1143, 18781.303)(600…
4'-hydroxyadonixanthin	1.08846e+07	5.56892e+06	3.36493e+06	1.51283e+06	CPD-20426 [ C40 H54 O4, tgt=86.86, overall=86.86 ]			(599.3133, 84261.48)(600.40607, 35794.93)(601.41614, 11423.836)(602.4243, 879.945)(581.3987, 10200.752)(582.3966, 5686.7847)(599.4056, 61916.438)(600.40784, 22653.99)(601.41187, 3669.375)(581.407, 11176.827)(582.4166, 4079.3398)(583.4187, 399.885)
3,4',4'-trihydroxyechinenone	1.08846e+07	5.56892e+06	3.36493e+06	6.44005e+06	CPD-20429 [ C40 H54 O4, tgt=86.86, overall=86.86 ]			(599.33307, 82593.01)(600.4067, 34318.53)(601.4167, 10836.571)(602.4243, 879.945)(581.3998, 8418.239)(582.39685, 5072.17)(599.4056, 61916.438)(600.40784, 22653.99)(601.41187, 3669.375)(581.407, 11176.827)(582.4166, 4079.3398)(583.4187, 399.885)
<i>trans</i>-neoxanthin / 4,4-dihydroxyzeaxanthin / 9'-<i>cis</i>-neoxanthin / 9-<i>cis</i>-violaxanthin / capsorubin / violaxanthin	6.77757e+06	5.27161e+06	5.14383e+06	7.94952e+06	CPD1F-135 [ C40 H56 O4, tgt=71.45, overall=71.45 ]			(600.4089, 7415.66)(583.32007, 29024.94)(584.4132, 12224.313)(585.4276, 7087.8877)(601.4188, 62448.305)(602.4213, 22135.025)(603.42725, 3159.289)(583.41473, 49391.656)(584.41675, 19077.23)(605.47, 771.62555)
1,2-dioleoylglycerol	1.06606e+06	1	1	1	CPD-15977 [ C39 H72 O5, tgt=53.13, overall=53.13 ]			(602.51733, 5871.825)(626.5273, 35124.797)(627.5301, 11978.227)(628.5343, 3848.6526)
pheophorbide <i>b</i>	125735	101436	182466	146930	CPD-7062 [ C35 H33 N4 O6, tgt=64.27, overall=64.27 ]			(607.2469, 9184.042)(608.2497, 1874.5626)
(2R,3Z)-phycocyanobilin	151427	119036	227526	172899	3Z-PHYCOCYANOBILIN [ C33 H36 N4 O6, tgt=25.94, overall=25.94 ]			(607.2469, 9505.469)(608.2497, 1940.3949)
tricoumaroyl spermidine	125735	54878.1	182466	146930	CPD-12212 [ C34 H37 N3 O6, tgt=17.76, overall=17.76 ]			(607.247, 9384.661)(608.24976, 1963.287)
epoxypheophorbide <i>a</i>	1.61808e+06	1.22623e+06	2.39148e+06	330446	CPD-18666 [ C35 H34 N4 O6, tgt=57.77, overall=57.77 ]			(607.24817, 9300.454)(608.2509, 1862.7141)(589.23584, 9310.035)(590.23834, 265.11002)(591.25006, 2131.195)(593.26575, 454.945)(607.2834, 51926.96)(608.2858, 17706.984)(609.28827, 1955.4648)
presqualene diphosphate	2.00962e+06	1.22422e+06	1.95053e+06	2.24693e+06	CPD-465 [ C30 H49 O7 P2, tgt=73.52, overall=73.52 ]			(607.2845, 52748.17)(608.287, 18042.723)(609.28925, 2033.6301)
all-<i>trans</i>-hexaprenyl diphosphate	2.00962e+06	1.42392e+06	1.95053e+06	2.24693e+06	ALL-TRANS-HEXAPRENYL-DIPHOSPHATE [ C30 H49 O7 P2, tgt=73.52, overall=73.52 ]			(607.28455, 52469.42)(608.28705, 17935.123)(609.2893, 2020.1996)
pheophorbide <i>a</i>	720010	489961	698950	831364	CPD-7061 [ C35 H34 N4 O5, tgt=58.31, overall=58.31 ]			(608.28705, 20094.201)(609.2893, 2280.165)
chlorophyllide <i>b</i>	2.3893e+06	2.65201e+06	2.61925e+06	2.23149e+06	CPD-7014 [ C35 H30 Mg N4 O6, tgt=9.60, overall=9.60 ]			(610.1773, 59044.234)(611.17773, 31021.31)(612.1777, 19781.604)
3,8-divinyl protochlorophyllide <i>a</i>	2.70603e+06	3.00442e+06	2.89951e+06	2.49062e+06	DIVINYL-PROTOCHLOROPHYLLIDE-A [ C35 H28 Mg N4 O5, tgt=37.02, overall=37.02 ]			(610.17737, 62755.098)(611.17773, 32979.395)(612.1777, 21254.193)(613.175, 7072.2056)(614.17303, 1576.9393)
hesperidin	570505	4.92681e+06	5.75901e+06	4.26928e+06	CPD-7075 [ C28 H34 O15, tgt=50.66, overall=50.66 ]			(610.1776, 55468.08)(611.1779, 29213.799)(616.1677, 12681.513)(617.1704, 2902.2275)
neohesperidin	570505	142712	1	4.26928e+06	CPD-7074 [ C28 H34 O15, tgt=50.66, overall=50.66 ]			(610.1792, 49591.957)(611.1795, 26266.76)(616.1677, 12681.513)(617.1704, 2902.2275)
kaempferide 3-<i>O</i>-&beta;-<i>D</i>-glucopyranosyl -(1->2)-<i>O</i>-&alpha;-<i>L</i>-rhamnoside	201585	182765	198798	2.16341e+06	CPD-14962 [ C28 H32 O15, tgt=37.17, overall=37.17 ]			(610.1793, 54353.996)(611.1796, 28739.885)(612.17755, 20260.066)(613.1769, 5754.7344)(614.1751, 1168.4158)(613.1578, 18408.75)(614.15967, 1409.9093)
3,5-di-<i>C</i>-glucosyl-2,4,4',6-tetrahydroxydibenzoylmethane	1.80256e+06	1.03239e+06	1.18376e+06	2.16734e+06	CPD-20023 [ C27 H31 O16, tgt=86.65, overall=86.65 ]			(611.1524, 33272.555)(612.1594, 56857.08)(613.1606, 10247.79)(595.15936, 65196.19)(596.1618, 15614.3125)(597.16394, 2281.8955)(634.1396, 2040.37)(617.1397, 11055.431)(618.14246, 1894.4849)
cyanidin 3-(p-coumaroyl)-glucoside / cyanidin 3-<i>O</i>-&beta;-<i>D</i>-p-coumaroylglucoside / pelargonidin 3-<i>O</i>-&beta;-D-caffeoylglucoside	1.80056e+06	5.30214e+06	1.18194e+06	875069	CPD-7866 [ C30 H25 O13, tgt=87.85, overall=87.85 ]			(611.1528, 176312.67)(612.1559, 82762.98)(613.15704, 16253.709)(614.1588, 1528.635)(595.15967, 63816.844)(596.1622, 15320.374)(597.1642, 2279.9897)(617.1391, 13052.459)(618.1418, 2465.6692)
cyanidin 3-<i>O</i>-&beta;-<i>D</i>-caffeoylglucoside	5.94655e+06	5.9838e+06	5.42827e+06	5610005	CPD-18098 [ C30 H25 O14, tgt=87.75, overall=87.75 ]			(611.15326, 322255.7)(612.15576, 84462.914)(613.1569, 16570.666)(614.1587, 1358.6866)(611.15546, 274004.7)(612.15784, 70571.38)(613.1591, 13597.174)(614.1608, 1088.605)(633.1336, 18802.828)(634.1362, 4009.8984)
kaempferol 3-<i>O</i>-&beta;-<i>D</i>-glucosyl-(1->2)-&beta;-D-glucoside / kaempferol 3-<i>O</i>-&beta;-<i>D</i>-glucosylgalactoside	5.94868e+06	5.9838e+06	5.42827e+06	5.60878e+06	CPD-8067 [ C27 H29 O16, tgt=90.33, overall=90.33 ]			(611.1542, 286311.44)(612.15656, 74155.64)(613.1579, 14380.552)(614.15967, 1236.5421)(611.1573, 263669.38)(612.1597, 67517.32)(613.1615, 11437.59)(633.1346, 17923.158)(634.1374, 3718.4565)
<i>N</i>-[&beta;-glucosyl-(1,4)-&beta;-glucosyl]-(oxindol-3-yl)acetyl-aspartate	7.45995e+06	7.49305e+06	6.79328e+06	7.01326e+06	CPD-9603 [ C26 H32 N2 O16, tgt=47.68, overall=47.68 ]			(611.1542, 287647.94)(612.15656, 74506.36)(613.1579, 14462.008)(614.15967, 1243.8223)(611.1573, 266055.72)(612.1597, 68139.76)(613.1609, 13054.999)(614.1629, 846.32404)(633.1368, 16345.568)(634.1395, 3197.69)
cyanidin 3,5-di-<i>O</i>-&beta;-D-glucoside / cyanidin 3,7-di-<i>O</i>-&beta;-D-glucoside / cyanidin 3-<i>O</i>-sophoroside / delphinidin 3-<i>O</i>-rutinoside / kaempferol 3,7-bis-<i>O</i>-&beta;-D-glucoside / kaempferol 3-<i>O</i>-&beta;-gentiobioside / luteolin-7-<i>O</i>-gentiobioside / quercetin 3-<i>O</i>-rhamnoside-7-<i>O</i>-glucoside / quercetin-3-<i>O</i>-glucoside-7-<i>O</i>-rhamnoside…	1.30172e+07	13137500	11875000	1.23221e+07	CPD-7138 [ C27 H30 O16, tgt=59.19, overall=59.19 ]			(611.15515, 281241.1)(612.15765, 72592.39)(613.15894, 14040.414)(614.16046, 1149.6764)(633.1346, 18032.537)(634.1374, 3759.6067)
&alpha;-hydroxyheme	1.768e+06	1.75467e+06	1.57462e+06	1.64615e+06	CPD-19720 [ C34 H30 Fe N4 O5, tgt=54.29, overall=54.29 ]			(611.1553, 293831.22)(612.1577, 75862.586)(613.15894, 14778.778)(614.16046, 1210.7024)(633.1346, 18633.914)(634.1374, 3955.361)
quercetin 3-<i>O</i>-(3'-<i>O</i>-<i>p</i>-coumaroyl)-glucoside / quercetin 3-<i>O</i>-(4\-<i>O</i>-<i>p</i>-coumaroyl)-glucoside" / quercetin 3-<i>O</i>-(6\-<i>O</i>-<i>p</i>-coumaroyl)-glucoside"	1.30307e+07	13137500	11875000	1.23221e+07	CPD-14989 [ C30 H26 O14, tgt=42.08, overall=42.08 ]			(611.15546, 276998.2)(612.15784, 71364.41)(613.1591, 13778.664)(614.1608, 1110.4869)(611.15326, 322255.7)(612.15576, 84462.914)(613.1569, 16570.666)(614.1587, 1358.6866)(633.1346, 18032.537)(634.1374, 3759.6067)
glutathione disulfide	1.30307e+07	13137500	11875000	1.23221e+07	OXIDIZED-GLUTATHIONE [ C20 H30 N6 O12 S2, tgt=48.08, overall=48.08 ]			(611.1573, 266055.72)(612.1597, 68139.76)(613.1609, 13054.999)(614.1629, 846.32404)(611.1542, 289195.34)(612.15656, 74924.73)(613.1579, 14556.583)(614.15967, 1258.0165)(633.1346, 18032.537)(634.1374, 3759.6067)
6-methoxypodophyllotoxin 7-glucoside	1	2.12086e+06	1	6.65113e+06	CPD-16747 [ C29 H34 O14, tgt=44.71, overall=44.71 ]			(611.1573, 271154.66)(612.1597, 69456.12)(613.1609, 13331.704)(614.1629, 869.16394)
<i>N,N',N''</i>-triacetylchitotriose	63694.6	54960.1	102040	1	CPD-13227 [ C24 H41 N3 O16, tgt=0.26, overall=0.26 ]			(611.25946, 7666.8237)(645.2828, 6946.29)(646.286, 345.77)
allosamidin	66726.9	82644.9	1	123845	CPD-19387 [ C25 H42 N4 O14, tgt=42.39, overall=42.39 ]			(611.2638, 131.76)(641.1624, 6450.7573)(642.311, 211.37666)(651.28937, 284.97)
kaempferol 3-<i>O</i>-(3\-<i>O</i>-<i>p</i>-coumaroyl)-glucoside" / kaempferol 3-<i>O</i>-(4\-<i>O</i>-<i>p</i>-coumaroyl)-glucoside" / kaempferol 3-<i>O</i>-(6\-<i>O</i>-<i>p</i>-coumaroyl)-glucoside"	1.13009e+06	1.31426e+06	1.31889e+06	1.03322e+06	CPD-14988 [ C30 H26 O13, tgt=71.67, overall=71.67 ]			(612.1756, 23356.752)(613.175, 6978.0146)(614.1731, 1459.7596)
delphinidin 3-<i>O</i>-&beta;-<i>D</i>-sambubioside	3.04856e+06	2.14486e+06	2426380	666407	CPD-18092 [ C26 H27 O16, tgt=60.40, overall=60.40 ]			(613.16113, 15970.065)(614.16296, 714.79004)(595.15906, 65353.26)(596.16156, 15633.575)(597.1637, 2303.659)
delphinidin 3,5-di-<i>O</i>-&beta;-D-glucoside / delphinidin 3,7-di <i>O</i>-&beta;-<i>D</i>-glucoside / delphinidin 3-<i>O</i>-sophoroside / quercetin 3,4'-<i>O</i>-diglucoside / quercetin 3,5-<i>O</i>-diglucoside / quercetin 3,7-<i>O</i>-diglucoside / quercetin 3-<i>O</i>-&beta;-<i>D</i>-glucosyl-(1->2)-&beta;-<i>D</i>-glucoside / quercetin 3-<i>O</i>-&beta;-<i>D</i>-glucosylgalactoside / querc…	172727	1.31371e+06	1.63621e+06	1	CPD-7139 [ C27 H30 O17, tgt=9.03, overall=9.03 ]			(613.17346, 6758.3853)(614.1715, 1498.9529)
p-(bromoacetamido)phenyl uridyl pyrophosphate	261156	358915	710520	418765	CPD0-1326 [ C17 H18 Br N3 O13 P2, tgt=56.13, overall=56.13 ]			(615.94995, 36648.918)(616.9517, 2575.825)(594.93896, 2527.2576)(639.93835, 2812.4387)(640.9415, 240.36)(617.92535, 3433.6062)(618.9262, 243.08)
CHAPS	1.05279e+06	1.37169e+06	999830	314141	CPD0-1088 [ C32 H58 N2 O7 S, tgt=29.50, overall=29.50 ]			(616.0789, 5275.2)(617.0811, 815.34)(617.41394, 106.6)(597.40576, 2912.0728)(599.40466, 37362.336)(600.4069, 15970.439)(599.22675, 25566.957)(600.4102, 16369.305)(616.48987, 6586.8975)(617.5873, 2423.9543)(617.8143, 1214.5759)(618.4156, 1557.55)(639.3935, 3682.8215)(640.3972, 1339.6884)
4',4'-dihydroxyadonixanthin	1.41843e+06	2.8638e+06	1.67606e+06	2.30362e+06	CPD-20427 [ C40 H54 O5, tgt=58.14, overall=58.14 ]			(616.12775, 4765.1396)(616.78033, 1384.9528)(617.41327, 1010.6888)(618.4179, 1017.95)(598.52686, 25305.59)(599.68896, 18096.168)(600.6293, 20777.525)(601.12695, 13524.653)(601.86035, 3955.359)(602.4184, 604.70496)(616.0806, 6591.938)(616.4133, 1408.7)(617.4145, 627.64)(598.0753, 13182.758)(599.1888, 8162.691)(601.41907, 12065.258)(602.4193, 2528.6924)(637.46045, 12275.591)(638.46326, 3093.8848)(6…
1,2-di-O-sinapoyl-&beta;-D-glucose / 7-<i>O</i>-methylvitexin 2''-<i>O</i>-&beta;-L-rhamnoside	599247	142712	1	1	12-BIS-O-SINAPOYL-BETA-D-GLUCOSIDE [ C28 H32 O14, tgt=50.42, overall=50.42 ]			(616.1677, 12537.839)(617.1704, 2860.501)
protoheme	656688	304059	152312	188932	PROTOHEME [ C34 H30 Fe N4 O4, tgt=57.06, overall=57.06 ]			(616.1677, 12537.839)(617.1704, 2860.501)(613.17413, 13819.998)(614.17206, 4356.701)(595.1604, 55771.492)(596.16284, 13357.245)(597.16486, 1630.8821)(617.1408, 8985.638)(618.1435, 1178.9384)
4-sinapoyloxybutylglucosinolate	425095	229184	249582	50420.8	CPD-12422 [ C22 H30 N O14 S2, tgt=29.65, overall=29.65 ]			(617.1394, 12638.692)(618.1422, 2126.7583)
ferric biliverdine-IX &alpha;	317598	191369	178793	85319.2	CPD-19721 [ C33 H30 Fe N4 O6, tgt=42.16, overall=42.16 ]			(617.13965, 12364.023)(618.1424, 2005.546)
verdoheme	369282	260978	203915	165192	CPD-19719 [ C33 H29 Fe N4 O5, tgt=15.81, overall=15.81 ]			(617.13965, 12473.734)(618.1424, 2022.9043)
(20<i>S</i>)-ginsenoside Rh2	923463	423215	1.05007e+06	596457	CPD-12104 [ C36 H62 O8, tgt=61.73, overall=61.73 ]			(623.5234, 2032.7434)(625.3987, 4890.904)(626.52264, 2587.5671)(627.4937, 7153.6636)(628.3307, 2170.175)(628.4553, 1874.3)(623.4451, 17085.148)(624.4484, 3305.2524)(625.4378, 2378.99)(626.4287, 452.705)(609.4428, 7009.621)(610.55096, 11491.435)(611.4601, 69513.01)(631.42224, 480.4025)
guanosine tetraphosphate /ppGpp	125475	173434	336776	203194	GUANOSINE_TETRAPHOSPHATE [ C10 H12 N5 O17 P4, tgt=58.86, overall=58.86 ]			(625.9109, 802.31494)(584.921, 3105.395)(615.9499, 38880.387)(616.9517, 2683.4048)(603.89844, 732.61993)
dimeric urushiol / urushiol quinone	1.83262e+06	498188	1.08403e+06	3.37225e+06	CPD-12622 [ C42 H58 O4, tgt=38.05, overall=38.05 ]			(627.4511, 4378.501)(609.4437, 27581.898)(610.4465, 8819.926)(611.4492, 1026.7306)(627.45593, 23273.195)(628.4588, 7601.5713)(629.4636, 216.04668)(635.782, 1293.92)
8'-(3,4-dihydroxy-5-alkenyl)phenyl-3-[9'E,11'E,13'Z-pentadecatrienyl]catechol	1.83262e+06	2.35398e+06	2.34033e+06	3.37225e+06	CPD-12632 [ C42 H58 O4, tgt=38.05, overall=38.05 ]			(627.4514, 8095.7046)(628.45557, 9978.616)(629.4595, 1216.175)(609.44385, 30173.773)(610.4466, 9862.783)(611.4492, 1026.7306)(627.456, 23885.775)(628.45874, 7825.206)(629.4652, 200.23999)(636.3582, 1750.5166)
tricaffeoyl spermidine	28717.6	1	28310.9	1	CPD-12213 [ C34 H37 N3 O9, tgt= ]			(631.25116, 2733.355)(632.2892, 2883.735)
primary fluorescent chlorophyll catabolite	818857	1.19092e+06	138635	1212001	CPD-7064 [ C35 H38 N4 O7, tgt=58.86, overall=58.86 ]			(632.2887, 2083.7224)(609.7135, 1122.9034)(613.27435, 6745.6226)(644.30475, 11061.993)(645.30786, 2530.5388)(626.29315, 2716.166)(649.26056, 29943.748)(650.26324, 6395.947)(651.25433, 990.3964)(631.2523, 2719.0059)
1-[18-hydroxyoeoyl]-2-[18-hydroxy-linoleoyl]-<i>sn</i>-glycerol	434288	1	1	1	CPD-17375 [ C39 H70 O7, tgt=90.17, overall=90.17 ]			(632.4851, 2766.7676)(633.49744, 7724.9976)(634.5005, 1423.9)(653.55, 13679.066)(654.55286, 4521.6777)(654.55225, 7458.457)(655.561, 7111.35)(656.5664, 1553.73)(658.5049, 3910.2136)(659.257, 2009.8601)(660.5158, 1713.51)
gypsogenin-28-beta-D-glucoside	740297	424844	692064	150251	CPD-9472 [ C36 H56 O9, tgt=38.63, overall=38.63 ]			(633.3939, 567.4528)(633.39624, 1415.22)(617.412, 1764.9888)(650.4308, 9833.347)(651.4339, 1666.5057)(637.42114, 573.445)(638.4296, 1006.6)(656.44147, 2191.323)(658.90717, 1556.6315)(661.3838, 916.65)(639.3937, 4654.348)(640.3967, 3943.62)(641.4011, 621.17)
soyasapogenol B-3-<i>O</i>-&beta;-glucuronide	728379	698564	1.13099e+06	941823	CPD-7612 [ C36 H57 O9, tgt=56.21, overall=56.21 ]			(633.3941, 435.55334)(617.4119, 1070.82)(617.4129, 3079.56)(656.3934, 27457.035)(657.3967, 7885.378)(644.39197, 1682.142)
deferoxamine mesylate	579306	682345	637598	700046	CPD-8951 [ C26 H52 N6 O11 S, tgt=41.76, overall=41.76 ]			(638.3153, 441.66428)(659.3584, 8555.025)(660.3615, 2451.495)(661.36334, 303.93)(676.4062, 2505.9788)(678.37006, 773.1965)(659.35675, 8342.737)(660.3597, 2276.2625)(661.36017, 311.69357)(679.5335, 8918.395)(680.35675, 1456.6693)(663.08057, 9776.857)(663.33026, 2731.8467)(664.3423, 1446.0533)
bis(&beta;-D-glucosyl) crocetin	458682	762702	233360	507941	CPD-8667 [ C32 H44 O14, tgt=60.68, overall=60.68 ]			(639.28906, 5215.06)(640.0946, 3330.4578)(670.30493, 14481.622)(671.30835, 3436.2927)(653.30383, 5322.633)(654.30707, 562.86)(679.2852, 406.35)
red chlorophyll catabolite	281150	329296	431650	348091	CPD-7063 [ C35 H36 N4 O7, tgt=45.23, overall=45.23 ]			(642.28815, 3217.8335)(647.2443, 20118.002)(648.2472, 4078.487)
brassinolide-23-O-glucoside	1	1	1	118666	CPDQT-523 [ C34 H58 O11, tgt=14.00, overall=14.00 ]			(642.3793, 8860.051)(643.382, 1513.318)(660.4223, 3934.46)(665.3808, 2180.76)
dimeric urushiol peroxide	962897	543850	1.2415e+06	514741	CPD-9598 [ C42 H58 O5, tgt=14.24, overall=14.24 ]			(643.4475, 3556.1587)(644.74615, 652.817)(645.45544, 2318.3286)(646.4583, 1770.65)(625.4393, 11329.59)(626.4424, 2440.625)(625.4375, 10919.434)(626.44073, 2044.4385)(627.453, 1094.04)(662.46875, 935.49)(643.4468, 2377.23)(644.45044, 318.91)(645.4579, 8306.2)(646.4606, 2104.2)(666.4236, 480.41748)
7<sup>1</sup>-hydroxychlorophyllide <i>a</i>	208600	250207	321102	267472	CPD-7015 [ C35 H32 Mg N4 O6, tgt=15.35, overall=15.35 ]			(647.2444, 18948.207)(648.24725, 3747.9658)
dipalmitoyl phosphatidate	184638	341565	342179	220729	CPD0-1422 [ C35 H67 O8 P, tgt=14.04, overall=14.04 ]			(647.4743, 143.39)(629.00757, 6194.92)(630.067, 966.9539)(630.1342, 7921.434)(631.137, 1991.118)(646.80023, 3079.4133)(669.44073, 6244.94)(670.44336, 1303.3717)
coproporphyrin I / coproporphyrin III	203931	293142	1	193656	COPROPORPHYRIN_I [ C36 H34 N4 O8, tgt=50.09, overall=50.09 ]			(650.2633, 9835.29)(651.2542, 1169.9431)
castasterone-23-O-glucoside	614985	649380	1.12293e+06	439155	CPDQT-522 [ C34 H58 O10, tgt=41.74, overall=41.74 ]			(655.39044, 573.08496)(614.96545, 5207.8696)(615.41504, 5591.913)(644.81287, 1109.5858)(645.958, 552.87)(631.4201, 1382.2734)(634.14856, 638.15753)(636.41016, 106.42)(626.842, 1483.6307)
1-18:1-2-16:0-phosphatidate	57028.9	1	178646	21801.2	CPD-8264 [ C37 H69 O8 P, tgt= ]			(655.48157, 967.99)(695.45465, 7451.5103)(696.4582, 1034.11)
triferuloyl spermidine	1	137160	1	66474.5	CPD-12214 [ C37H43N3O9, tgt= ]			(660.31586, 1816.635)
rubusoside / steviolbioside	125657	118831	75565	61986	CPD-14505 [ C32 H50 O13, tgt=54.67, overall=54.67 ]			(660.35944, 10295.618)(661.36035, 1155.0416)
coproporphyrinogen III	124278	212851	124609	84937.6	COPROPORPHYRINOGEN_III [ C36 H40 N4 O8, tgt=61.16, overall=61.16 ]			(660.43475, 2119.8325)(639.2918, 6942.7095)(640.2932, 221.19334)(661.80066, 4555.1265)(662.29535, 850.83606)(639.2943, 6706.771)(640.29706, 418.40997)(675.3075, 2136.766)(660.3162, 1773.607)(662.33105, 618.72)(685.2976, 109.68)(665.27045, 10726.901)(666.2734, 2080.7056)(667.2845, 8568.556)
16-alpha-hydroxygypsogenate-28-beta-D-glucoside	951302	1.4529e+06	805484	996808	CPD-9477 [ C36 H55 O11, tgt=50.26, overall=50.26 ]			(663.36383, 24167.775)(664.3665, 6419.6865)(665.3736, 559.99316)(682.90924, 508.36584)(684.5649, 291.7143)(664.39185, 6606.16)(665.39374, 1673.35)(689.44806, 2022.2355)(689.9455, 1073.8275)(690.3822, 183.21)(674.36774, 1458.3168)
cyclobis-(1&rarr;6)-&alpha;-nigerosyl	112664	1	1	294021	CPD-19461 [ C24 H40 O20, tgt= ]			(667.26685, 326.41333)(651.2543, 1351.65)
(+)-secoisolariciresinol diglucoside	1.0133e+06	1.17927e+06	923656	734836	CPD-16684 [ C32 H46 O16, tgt=35.18, overall=35.18 ]			(668.28613, 2966.3198)(687.3109, 14231.17)(688.39923, 3180.6387)(690.333, 522.37)
&beta;-D-gentiobiosyl crocetin	2.05988e+06	4.01447e+06	1.45608e+06	2.64816e+06	CPD-8664 [ C32 H43 O14, tgt=88.25, overall=88.25 ]			(669.3011, 35616.79)(670.3042, 9441.245)(671.30774, 2794.7327)
1-linoleoyl-2-palmitoleoyl-<i>sn</i>-glycerol 3-phosphate	294520	250228	366028	193403	CPD-8369 [ C37 H65 O8 P, tgt=54.14, overall=54.14 ]			(669.44196, 6082.154)(670.4437, 1161.8119)(650.42993, 6668.1665)(651.43353, 1787.7399)(669.44, 6181.4023)(670.4439, 288.9)(689.48254, 5756.176)(690.48553, 2306.2334)(668.47284, 2753.6602)(693.55054, 3035.093)(695.11786, 417.49332)(674.4298, 3392.7275)(675.433, 1300.44)
curcumin 4'-O-&beta;-D-gentiobioside / curcumin diglucoside	89921	87705.4	248201	61505.4	CPD-6624 [ C33 H40 O16, tgt=6.66, overall=6.66 ]			(677.2539, 268.4)(711.2779, 650.63)(693.26807, 6926.8438)(694.2709, 881.25195)
glucodigifucoside	544734	1.48059e+06	364413	967273	CPD-10539 [ C35 H54 O13, tgt=58.64, overall=58.64 ]			(682.35455, 598.56)(664.3454, 15765.151)(665.34827, 3241.2698)(666.3497, 269.466)(709.03864, 345.19998)(690.3345, 273.485)
prephytoene diphosphate	336249	602987	1.06624e+06	1	CPD-464 [ C40 H65 O7 P2, tgt=58.80, overall=58.80 ]			(702.43134, 2153.7234)(703.4346, 782.615)(702.432, 3227.4448)(703.4343, 842.895)(742.4601, 1261.715)(743.46313, 21657.523)(745.26337, 4150.2866)(746.79785, 5459.41)(747.7213, 4383.23)(748.34174, 3518.7383)(748.4361, 4153.62)(728.41223, 11418.269)(729.5734, 3691.989)(730.4245, 5917.0806)
&beta;-solanine	2.16707e+06	80850	671954	132836	CPD-9212 [ C39H63NO11, tgt= ]			(703.43414, 1272.27)(725.45074, 1163.21)(726.44653, 437.82)(744.2172, 19833.719)(744.76105, 4969.6904)(745.4077, 4312.547)(728.7352, 3787.1392)(730.50604, 12601.92)(732.1199, 10397.537)(731.933, 7418.2627)(732.43823, 711.56)
dioleoyl phosphatidate	555292	610341	521545	534462	CPD-8268 [ C39 H71 O8 P, tgt=64.27, overall=64.27 ]			(703.49817, 11307.875)(704.49805, 3454.276)(680.4741, 20362.838)(681.4768, 7791.0425)(682.4802, 977.83496)(703.50073, 5644.6323)(704.4965, 1541.3734)(681.4864, 12827.89)(682.4892, 3491.1287)(725.31885, 6853.634)(726.51276, 3596.4597)(706.4768, 1638.09)
&beta;-chaconine	1.49669e+06	1.13799e+06	1.5845e+06	611950	CPD-9215 [ C39 H64 N O10, tgt=25.51, overall=25.51 ]			(707.4551, 2984.375)(710.4597, 3730.66)(690.1069, 1261.7499)(691.94226, 607.125)(693.4393, 630.87)(690.4326, 980.67)(711.49384, 2843.74)(730.1784, 3131.5613)(730.4377, 1750.6566)(731.4497, 564.80505)(712.3813, 58689.0)(713.5685, 22787.965)(714.5361, 16489.28)(715.4332, 4544.894)(716.4436, 1094.775)
Bz<sub>2</sub>ATP	1	1	1	54341	CPD0-1552 [ C24 H20 N5 O15 P3, tgt=12.54, overall=12.54 ]			(712.0005, 5836.295)(734.0132, 3637.7148)
1-[18-hydroxyoeoyl]-2-[18-hydroxy-lioleoyl]-<i>sn</i>-glycerol 3-phosphate	302900	616324	554394	633077	CPD-17373 [ C39 H69 O10 P, tgt=42.86, overall=42.86 ]			(712.4792, 481.94)(729.486, 10653.446)(730.48975, 3702.2869)(712.4803, 2551.7466)(747.34094, 5688.5146)(748.4977, 912.285)(729.48413, 9590.419)(730.48785, 3333.257)(757.4573, 236.58333)
lipid X	3.10804e+06	1.16508e+06	1.0989e+06	234900	BISOHMYR-GLUCOSAMINYL-1P [ C34 H64 N O12 P, tgt=61.11, overall=61.11 ]			(714.4318, 1810.6466)(715.4348, 466.92334)(696.42096, 3288.1162)(697.42444, 700.01556)(714.4336, 8954.063)(715.4358, 3191.59)(716.43335, 1099.975)(696.4217, 2986.9)(697.4249, 555.78)(727.4684, 41634.07)(728.4706, 17237.787)(729.4731, 3138.1343)(709.6749, 6674.821)(710.7216, 1348.0767)(736.8027, 3032.9177)(738.4056, 1780.3467)(717.5717, 4527.612)(719.5896, 4219.9937)(720.3916, 755.64)
1-16:0-2-18:4-diacylglycerol-trimethylhomoserine	4.09237e+06	687430	4.01925e+06	327007	CPDIO2-8 [ C44H77NO7, tgt= ]			(714.54376, 83006.695)(715.5463, 31443.854)(716.5484, 10509.517)(759.4651, 7137.968)(759.8467, 6716.813)(760.5704, 469.33)
menaquinone-<i>8</i>	245742	506647	223005	627307	CPD-9728 [ C51H72O2, tgt= ]			(716.55084, 10773.184)(698.5438, 10000.632)(699.54877, 2990.0435)
all-<i>trans</i>-octaprenyl diphosphate	621072	894163	1.06624e+06	2.1412e+06	OCTAPRENYL-DIPHOSPHATE [ C40 H65 O7 P2, tgt=58.80, overall=58.80 ]			(719.40454, 8010.95)(720.41223, 2062.8198)(703.21875, 1871.8258)(704.4222, 470.2475)(726.435, 1408.6824)(702.4339, 2593.9958)(703.43616, 455.66)(742.1759, 10862.333)(743.1778, 17486.803)(742.45636, 2478.4702)(743.46173, 6624.2803)(745.62, 8712.902)(747.12695, 6374.595)(747.7443, 4195.1406)(748.34985, 3455.0364)(748.4361, 4153.62)(728.48706, 9848.783)(729.60114, 3126.0574)(730.4257, 5418.7915)
1-18:0-2-18:4-phosphatidylethanolamine	5.47526e+06	974920	2336474	1362571	CPDIO2-4 [ C41 H74 N O8 P, tgt=57.46, overall=57.46 ]			(721.49976, 4270.98)(722.50806, 4092.46)(728.5149, 1656.2075)(757.5482, 40541.45)(758.5507, 7764.5337)(759.5532, 1437.1699)(762.5215, 18122.19)(763.52435, 6524.1562)(764.526, 633.895)(745.4944, 10027.78)(746.4977, 3077.0679)
ubiquinol-<i>8</i>	442143	561105	800304	632468	CPD-9956 [ C49 H76 O4, tgt=30.23, overall=30.23 ]			(728.5756, 6296.74)(729.5776, 1249.07)(728.57916, 35342.055)(729.58167, 12289.193)(730.5841, 1799.6998)
ubiquinone-<i>8</i>	156940	205942	284193	189670	UBIQUINONE-8 [ C49 H74 O4, tgt=30.20, overall=30.20 ]			(728.57825, 28378.469)(729.5807, 9570.31)(730.58356, 1520.2767)(714.5462, 6638.27)(728.58105, 42854.535)(729.5836, 14959.45)(730.5856, 2296.19)(733.5237, 4230.36)
2-nonaprenyl-6-hydroxyphenol	156885	205935	284193	189670	CPDQT-16 [ C51 H78 O2, tgt=57.80, overall=57.80 ]			(728.5788, 31273.684)(729.58124, 10648.139)(730.5841, 1714.2549)
plastoquinone-9	284644	288492	741089	779387	PLASTOQUINONE-9 [ C53 H80 O2, tgt=63.69, overall=63.69 ]			(730.5848, 1530.935)(772.5995, 30338.277)(773.6022, 11011.799)(774.60925, 3439.1099)
<i>N</i>-debenzoyl-(3'-<i>RS</i>)-2'-deoxytaxol	13708.8	1	1	1	CPD-12845 [ C40 H48 N O12, tgt=1.23, overall=1.23 ]			(734.3508, 3628.61)(735.3744, 342.72)
1-18:0-2-18:3-phosphatidylethanolamine	2.15474e+07	3.98215e+07	3.28335e+07	2.95145e+07	CPDIO2-3 [ C41 H76 N O8 P, tgt=83.16, overall=83.16 ]			(741.5178, 708.97955)(742.53705, 10605.577)(743.5401, 3539.5303)(744.5469, 1122.385)(760.5731, 4871.0)(761.5766, 2375.193)(742.5377, 9291.709)(743.5406, 3188.1846)(744.5468, 847.99774)(764.5232, 401169.53)(765.52606, 183488.62)(766.5326, 76645.41)(767.5372, 18942.42)(768.54114, 5736.326)(747.5246, 3226.5327)(748.5289, 816.7138)(749.86835, 176.18727)(750.5033, 191.3675)
amaranthin	36782.1	1	47762.1	1	CPD-8658 [ C30 H32 N2 O19, tgt= ]			(743.1927, 8093.8867)(744.1956, 1662.4615)
1-18:3-2-16:4-monogalactosyldiacylglycerol	1.09864e+07	1.08278e+07	6.01929e+06	20712500	CPDIO2-9 [ C43 H68 O10, tgt=84.21, overall=84.21 ]			(745.3973, 31533.143)(746.4928, 13170.435)(748.99005, 13708.3545)(748.4892, 4433.33)(726.4701, 3002.6626)(745.48334, 180399.44)(746.4861, 75285.14)(747.4888, 18485.865)(748.4932, 1825.1823)(727.47107, 36849.55)(728.4731, 15359.955)(729.47595, 2329.6616)(762.515, 15830.667)(763.52045, 6615.303)(764.52264, 444.14334)(769.48395, 9574.513)(770.27277, 5441.897)(769.47766, 645.35)(751.091, 671.59454)
1-&alpha;-linolenoyl-2-(3E)-hexadecenoyl-phosphatidylglycerol	4.88616e+06	3.18998e+06	4.16931e+06	2.48447e+06	CPD-2186 [ C40 H70 O10 P, tgt=67.11, overall=67.11 ]			(745.40247, 166247.08)(746.4057, 84622.836)(747.40857, 23928.857)(747.4855, 19851.36)(725.8365, 1963.7412)(726.904, 23338.215)(727.90765, 14905.48)(728.9095, 8338.384)(728.9741, 6204.6035)(729.47754, 1787.7633)(745.482, 227140.77)(746.4848, 96877.48)(747.48834, 25379.395)(748.49255, 4686.8184)(726.08887, 1192.9812)(727.09436, 41097.25)(728.09607, 26268.826)(729.0982, 8215.078)(729.478, 2189.9133)…
1-linoleoyl-2-palmitoyl-phosphatidylglycerol /1-oleoyl-2-(3E)-hexadecenoyl-phosphatidylglycerol	25275000	17562500	23487500	16825000	CPD-8086 [ C40 H74 O10 P, tgt=52.37, overall=52.37 ]			(745.68317, 197077.86)(746.4844, 85801.45)(747.48755, 22722.371)(748.49243, 3440.5)(730.31757, 19282.16)(729.10315, 13855.776)(729.47723, 2856.6667)(751.5251, 8306.339)(752.5275, 3357.3516)(733.51526, 2335.0764)(734.5182, 761.62)(751.52625, 7573.639)(772.05914, 2615.1917)(773.78937, 6916.3096)(774.5124, 3300.204)(755.498, 810.09283)
1-linoleoyl-2-(3E)-hexadecenoyl-phosphatidylglycerol	1.21001e+06	1.04404e+06	1.45663e+06	250012	CPD-2185 [ C40 H72 O10 P, tgt=52.09, overall=52.09 ]			(745.88806, 8795.487)(747.8293, 3735.0244)(745.491, 9168.989)(746.49426, 2429.9011)(750.494, 146.685)(728.5106, 1394.622)(763.39954, 39534.69)(764.567, 17398.53)(765.94293, 11264.803)(767.5389, 3246.2646)(768.43634, 18161.217)(769.4391, 6773.6606)(771.20264, 3583.092)
1-18:3-2-16:3-monogalactosyldiacylglycerol	85775000	77712500	74362500	68050000	CPD-2190 [ C43 H70 O10, tgt=55.78, overall=55.78 ]			(747.49445, 3363.6733)(748.49725, 549.6532)(747.4934, 5529.7197)(748.4964, 1247.5549)(729.4838, 5496.046)(730.4875, 1959.3641)(764.5243, 886030.06)(765.52765, 410023.7)(766.5334, 162589.84)(767.5374, 42170.965)(768.54126, 6655.336)(769.4792, 182884.86)(770.4816, 75863.85)(771.48895, 33834.316)(772.496, 7661.769)(773.4996, 1867.6238)(757.5106, 221.18)
1-&alpha;-linolenoyl-2-palmitoyl-phosphatidylglycerol	1	1	1	250012	CPD-8087 [ C40H72O10P, tgt= ]			(747.4947, 12757.312)(748.49786, 4179.5464)(764.5245, 58393.02)(765.5269, 23992.275)(766.5354, 14522.97)(767.5398, 2202.9482)(769.4808, 19112.268)(770.48334, 8103.392)(771.4907, 2390.76)
molybdopterin adenine dinucleotide	238258	251606	414689	251127	CPD-8122 [ C20 H23 N10 O12 P2 S2, tgt=31.25, overall=31.25 ]			(748.0266, 6235.4795)(749.0296, 1406.3833)(726.0138, 8360.062)(727.0166, 1528.0918)
1-18:3-2-16:2-monogalactosyldiacylglycerol	2.37219e+06	1.48552e+06	2.27482e+06	95862.5	CPD-8078 [ C43 H72 O10, tgt=54.90, overall=54.90 ]			(748.51385, 6615.3203)(733.51685, 6006.1953)(734.52014, 1613.55)(751.52844, 19942.59)(752.5311, 7761.71)(753.5335, 341.54498)(769.54065, 6505.84)(770.54333, 2105.625)(771.6873, 64666.145)(772.68976, 28803.676)(773.6901, 5883.91)(775.3071, 1310.062)(753.9303, 5866.785)(755.4949, 5096.5396)(757.5043, 2106.885)
1-18:2-2-16:3-monogalactosyldiacylglycerol	2.37219e+06	1.48552e+06	2.50145e+06	1.34408e+06	CPD-8080 [ C43 H72 O10, tgt=54.90, overall=54.90 ]			(748.71265, 6772.6357)(749.8421, 1550.4501)(750.50385, 415.58002)(733.51685, 6006.1953)(734.52014, 1613.55)(751.52844, 19942.59)(752.5311, 7761.71)(753.5335, 341.54498)(733.5138, 4625.4053)(734.5166, 1636.28)(769.5391, 7613.375)(770.5421, 2569.245)(751.5251, 15605.12)(752.5277, 6170.73)(753.5294, 642.63)(771.7987, 59102.64)(772.8342, 28387.0)(773.8348, 5967.03)(775.762, 1297.0612)(754.25806, 8206…
1-oleoyl-2-palmitoyl-phosphatidylglycerol	2.1946e+06	1.80048e+06	2.44884e+06	1861440	CPD-2183 [ C40 H76 O10 P, tgt=80.28, overall=80.28 ]			(749.73395, 11316.799)(751.0532, 5378.686)(752.77844, 3292.9634)(753.15497, 2033.0975)(753.5296, 576.69666)(733.38025, 3559.9329)(734.51764, 1241.9142)(751.529, 15937.53)(752.5316, 6256.82)(733.5145, 3992.4949)(734.5213, 730.01)(769.5405, 2379.9866)(770.54333, 996.13)(772.4715, 61668.797)(773.98267, 70451.35)(774.9849, 25338.67)(775.9862, 4883.361)(776.51764, 1090.6617)(755.50073, 16774.258)(756.…
1-18:1-2-16:1-monogalactosyldiacylglycerol	6479686	4.98194e+06	4.48472e+06	4.56357e+06	CPD-2188 [ C43 H78 O10, tgt=45.13, overall=45.13 ]			(756.54486, 65688.74)(757.5473, 25953.312)(758.5499, 4559.4214)(756.54816, 60764.742)(757.551, 31628.166)(758.55347, 6496.63)(782.3768, 26400.256)(783.4726, 16368.553)(783.56335, 27598.105)
1-18:1-2-16:2-monogalactosyldiacylglycerol /1-18:2-2-16:1-monogalactosyldiacylglycerol / 1-18:3-2-16:0-monogalactosyldiacylglycerol	6.4978e+06	5.20091e+06	3.77179e+06	5136179	CPD-8077 [ C43 H76 O10, tgt=68.46, overall=68.46 ]			(756.54504, 8644.171)(757.5477, 2730.8298)(758.5547, 2184.7324)(756.54254, 9568.217)(757.5445, 2755.8162)(758.55457, 3186.8025)(770.5696, 82925.13)(771.5721, 34039.14)(772.5697, 7399.893)(773.56104, 528.182)(775.5383, 51292.117)(776.5347, 17921.236)(777.53424, 2740.6677)
1-18:2-2-16:0-monogalactosyldiacylglycerol	1	1	1	4.56357e+06	CPD-8073 [ C43H78O10, tgt= ]			(756.5482, 61590.918)(757.5513, 35341.656)(758.55347, 6496.63)(782.56335, 30053.803)(783.56604, 11766.995)
shisonin	671680	560220	966771	965991	CPD-7714 [ C36 H36 O18, tgt=17.34, overall=17.34 ]			(757.5441, 22336.107)(758.54614, 11465.41)(760.2132, 21871.107)(761.2124, 8109.7793)(762.2107, 2603.1833)(757.2095, 30543.58)(758.2119, 8798.365)(759.2141, 1080.015)(779.1899, 1068.31)
bisdemalonylsalvianin / pelargonidin-3,5-diglucoside-5-O-caffeoylglucoside	115762	185678	228995	965991	CPD-7140 [ C36 H36 O18, tgt=17.34, overall=17.34 ]			(757.5444, 21047.18)(758.5465, 10625.905)(760.2147, 20221.668)(761.21405, 7268.12)(762.21216, 2254.5981)
1-palmitoyl-2-linoleoyl-phosphatidylcholine	1.43169e+07	4.66383e+06	5.46311e+06	6.14106e+06	CPD-8158 [ C42 H80 N O8 P, tgt=65.97, overall=65.97 ]			(757.5476, 29633.545)(758.55035, 5618.818)(781.0836, 117429.234)(782.0865, 51580.426)(783.0886, 10221.753)(783.5528, 3218.9883)(763.5252, 1348.8525)
quercetin 3-<i>O</i>-(3',6\-<i>O</i>-di-<i>p</i>-coumaroyl)-glucoside"	409623	1.04995e+06	1.53669e+06	1.34809e+06	CPD-14984 [ C39 H32 O16, tgt=16.22, overall=16.22 ]			(758.2136, 39378.27)(759.2142, 27136.55)(760.2123, 21485.223)(761.2114, 7983.204)(762.2097, 2517.52)
kaempferol 3-<i>O</i>-(3\,6\"-<i>O</i>-di-<i>p</i>-coumaroyl)-glucoside" / kaempferol 3-<i>O</i>-(4\,6\"-<i>O</i>-di-<i>p</i>-coumaroyl)-glucoside"	2.02772e+06	2.81789e+06	2.95694e+06	2.55416e+06	CPD-14982 [ C39 H32 O15, tgt=44.11, overall=44.11 ]			(758.21375, 39376.953)(759.2141, 27105.283)
pelargonidin-3,5-diglucoside-5-O-p-coumaroylglucoside	2.02772e+06	2.81789e+06	2958268	2.55416e+06	CPD-7151 [ C36 H36 O17, tgt=9.01, overall=9.01 ]			(758.21375, 39376.953)(759.2141, 27105.283)(763.2069, 135.76)
1-palmitoyl-2-&alpha;-linolenoyl-phosphatidylcholine	3.56757e+06	7.77608e+06	4.6839e+06	4905856	CPD-8159 [ C42 H78 N O8 P, tgt=58.79, overall=58.79 ]			(758.5554, 9430.478)(759.5582, 7910.0)(757.094, 36908.465)(757.5487, 19119.254)(758.5515, 3050.9087)(744.5718, 3296.11)(774.58453, 1048.845)(775.5865, 519.39)(778.66724, 27146.79)(779.53314, 11991.168)(780.53674, 3130.5164)(781.5373, 251.72)(761.30945, 10966.29)(762.3127, 3570.2075)(763.7208, 552.02)(763.5232, 101.15)
1-palmitoyl-2-vernoloyl-phosphatidylcholine	2.67023e+06	5.84309e+06	4.25533e+06	7.39756e+06	CPD-12644 [ C42H80NO9P, tgt= ]			(758.55835, 25494.94)(759.5611, 10273.543)(760.564, 1528.5299)(757.92487, 48654.74)(758.92737, 19667.436)(759.6366, 3681.4678)(799.53705, 834.6267)(800.54395, 272.66998)(779.7821, 3500.5369)(779.81854, 2144.9387)(784.5699, 164.58)
cyanidin 3-<i>O</i>-(6-<i>O</i>-&beta;-D-glucosyl-2-<i>O</i>-&beta;-D-xylosyl-&beta;-D-galactoside) / cyanidin 5-<i>O</i>-&beta;-<i>D</i>-glucoside 3-<i>O</i>-&beta;-<i>D</i>-sambubioside	866803	1194630	1.11789e+06	290410	CPD-14999 [ C32 H38 O20, tgt=36.41, overall=36.41 ]			(760.21185, 25535.805)(761.21094, 10194.006)(762.2094, 3104.354)(763.2069, 160.44)
cyanidin 3-<i>O</i>-&beta;-<i>D</i>-(caffeoyl)-sambubioside	1.16186e+06	1194630	1.26551e+06	1.06771e+06	CPD-18097 [ C35 H34 O18, tgt=83.50, overall=83.50 ]			(760.2123, 24910.22)(761.2115, 9849.996)(762.20996, 2964.428)(763.2069, 160.44)
1-18:0-2-18:2-phosphatidylethanolamine	6.28392e+06	5.12005e+06	4.98329e+06	4914385	CPD-8290 [ C41 H78 N O8 P, tgt=93.12, overall=93.12 ]			(761.57684, 5674.5044)(766.53766, 179931.08)(767.5411, 67769.445)(768.5429, 13591.308)
1-&alpha;-linolenoyl-2-linoleoyl-phosphatidylcholine / 1-linoleoyl-2-&alpha;-linolenoyl-phosphatidylcholine	26512500	9.25234e+06	1.13131e+07	1.07802e+07	CPD-8090 [ C44 H78 N O8 P, tgt=53.48, overall=53.48 ]			(763.5725, 1162.2919)(764.53375, 3444.1)(780.5465, 137084.64)(781.54913, 60282.29)(782.55115, 12259.298)(783.55255, 2506.476)(802.5267, 12701.35)(803.53015, 4845.407)(804.53107, 2931.7676)
1-18:0-2-18:1-phosphatidylethanolamine	2755556	2.23728e+06	2.35767e+06	2.29859e+06	CPD-8289 [ C41 H80 N O8 P, tgt=90.43, overall=90.43 ]			(768.55347, 51949.684)(769.55396, 24575.81)(770.5558, 4616.663)(756.5416, 209.82)
6-methoxy-3-methyl-2-<i>all-trans</i>-nonaprenyl-1,4-benzoquinol	281187	281392	178698	771684	CPD-9872 [ C53 H82 O3, tgt=63.69, overall=63.69 ]			(772.6001, 28408.557)(773.6022, 10950.331)(774.60925, 3415.6099)
3-nonaprenyl-4-hydroxybenzoate	1.37533e+06	725858	863467	31754.5	NONAPRENYL-4-HYDROXYBENZOATE [ C52 H77 O3, tgt=48.16, overall=48.16 ]			(772.94574, 29493.105)(773.9484, 11464.267)(774.57056, 5913.5366)
kaempferol 3-<i>O</i>-&beta;-<i>D</i>-glucosyl-(1->2)-glucosyl-(1->2)-&beta;-<i>D</i>-glucoside	251862	1	58808.2	1	CPD-8068 [ C33 H40 O21, tgt= ]			(773.20337, 12520.196)(774.20624, 2852.64)
1-18:1-2-16:3-monogalactosyldiacylglycerol /1-18:2-2-16:2-monogalactosyldiacylglycerol / 1-18:3-2-16:1-monogalactosyldiacylglycerol	15725000	9.95e+06	1.4575e+07	11975000	CPD-8079 [ C43 H74 O10, tgt=68.88, overall=68.88 ]			(773.51294, 170942.3)(774.51556, 77616.83)(775.5171, 17293.28)(776.51807, 2192.7146)(733.51465, 4315.7812)(734.5174, 1490.0059)(751.14166, 8758.566)(752.52893, 5541.4365)(753.5314, 484.97797)(772.5715, 1148.15)(751.52637, 13942.733)(752.5289, 5432.0684)(753.53015, 628.6578)(755.5008, 28331.398)(756.5039, 11863.399)(757.50134, 2346.6804)
plastoquinol-9	1	1	1	108849	CPD-12829 [ C53 H82 O2, tgt=14.33, overall=14.33 ]			(773.6112, 22422.635)(774.6125, 3888.48)
3-nonaprenyl-4-hydroxybenzoate	167640	64449.8	28728.1	283702	CPDQT-18 [ C52 H78 O3, tgt=55.40, overall=55.40 ]			(773.92065, 13627.208)(774.9124, 5006.815)
1-18:3-2-18:3-monogalactosyldiacylglycerol	30012500	34687500	29487500	3.24625e+07	CPD-8168 [ C45 H74 O10, tgt=63.87, overall=63.87 ]			(774.6625, 8852.6875)(775.73883, 4114.5063)(777.5389, 9845.88)(778.54266, 3157.54)(779.5463, 327.76334)(775.5234, 2745.3145)(776.5263, 116.67)(757.52576, 2618.4797)(758.5271, 781.92896)(792.55414, 366359.84)(793.5573, 173673.6)(794.5623, 74281.94)(795.56635, 17603.346)(796.5698, 3454.6416)(776.55316, 29416.785)(775.54315, 31640.045)(776.5381, 9072.935)(797.5113, 91553.39)(798.52216, 41982.543)(79…
1-&alpha;-linolenoyl-2-&alpha;-linolenoyl-phosphatidylcholine	5.20436e+06	1.45852e+06	880098	2.70212e+06	1-183-2-183-SN-GLYCEROL-PHOSPHOCHOLINE [ C44 H76 N O8 P, tgt=47.63, overall=47.63 ]			(777.8512, 18403.3)(778.91473, 8453.819)(779.70996, 1103.4059)(760.90564, 9878.372)(761.9089, 2644.502)(762.5202, 11686.684)(763.52325, 4309.568)(764.52295, 1267.31)(778.53094, 48809.973)(779.5349, 21074.193)(780.53784, 3988.7412)(781.5373, 264.155)(763.3909, 17315.87)(764.3932, 6118.9546)(765.2765, 3278.5264)(763.52405, 610.06995)(764.5233, 89.555)(797.3435, 2802.1375)(798.33185, 1179.9808)(798.…
phosphatidylglycerophosphate (dioctadec-9-enoyl(Z))	652696	574350	415000	762990	CPDQT-521 [ C38 H69 O13 P2, tgt=40.99, overall=40.99 ]			(779.40857, 2672.458)(781.42377, 849.008)(798.25806, 2849.83)(800.9588, 1357.3617)(799.4475, 12798.84)(800.4514, 2680.7)(801.4649, 79696.22)(802.4676, 32261.89)(779.42065, 5888.1323)(780.7663, 2109.17)(782.67694, 1017.51)(784.442, 1496.315)(815.16833, 12857.971)(816.17487, 7535.7236)(817.16705, 9711.754)(818.0071, 23199.295)(818.7728, 15799.291)(819.47363, 23025.19)(798.4436, 10558.664)(798.87274…
1-18:3-2-18:2-monogalactosyldiacylglycerol	6.64506e+06	5114499	2383157	5.07604e+06	CPD-8167 [ C45 H76 O10, tgt=46.64, overall=46.64 ]			(779.45856, 12632.595)(779.6599, 20142.527)(782.5638, 56575.02)(758.5478, 4805.6626)(782.5613, 106024.2)(783.56384, 44508.7)(794.56647, 92416.01)(795.5693, 32778.62)(796.56946, 7053.607)(797.5799, 2613.55)(798.5807, 642.7)(801.617, 22240.533)(802.6201, 7714.4663)(801.5307, 1744.0684)(802.5393, 1066.18)
1-18:2-2-18:3-monogalactosyldiacylglycerol	5.425e+06	3.33473e+06	1	3.00511e+06	CPD-8166 [ C45 H76 O10, tgt=46.64, overall=46.64 ]			(779.7367, 24462.225)(780.28906, 38298.535)(782.5637, 56243.72)(758.5518, 5460.746)(782.5613, 106024.2)(783.56384, 44508.7)(794.57043, 95144.48)(795.57385, 37111.195)(796.57513, 7577.3516)(802.45294, 20030.87)(803.45575, 7465.107)(801.5321, 1305.936)
1-18:2-2-18:2-monogalactosyldiacylglycerol	5.12243e+06	3.17229e+06	2.38258e+06	2.23292e+06	CPD-8165 [ C45H78O10, tgt= ]			(779.98804, 78493.56)(781.27515, 56244.99)(782.54974, 16129.537)(783.55164, 2471.4375)(782.5637, 58130.74)(783.5663, 24051.1)(784.5684, 4176.21)(761.57544, 1116.8151)(796.5797, 41120.85)(797.57404, 20662.896)(798.57764, 4681.8813)(799.5275, 1191.0)(803.5994, 8935.403)(802.7763, 5272.7705)(803.54614, 479.85248)(788.53357, 2356.377)(789.5386, 816.115)
1-&alpha;-linolenoyl-2-oleoyl-phosphatidylcholine / 1-linoleoyl-2-linoleoyl-phosphatidylcholine / 1-oleoyl-2-&alpha;-linolenoyl-phosphatidylcholine	45537500	1.51239e+07	1.76155e+07	1.84386e+07	CPD-8089 [ C44 H80 N O8 P, tgt=55.05, overall=55.05 ]			(781.546, 1502.02)(782.5618, 114984.63)(783.5645, 49113.805)(784.56647, 9539.979)(785.56793, 1895.6932)(804.54205, 17157.916)(805.5449, 6601.6826)(806.5464, 1794.7057)
1-18:1-2-16:0-monogalactosyldiacylglycerol	8.24068e+06	9.14656e+06	9.82372e+06	9.19765e+06	CPD-2187 [ C43 H80 O10, tgt=45.64, overall=45.64 ]			(781.6977, 62618.21)(782.7003, 26045.447)(783.63617, 4986.851)(783.55444, 253.325)
1-palmitoyl-2-oleoyl-phosphatidylcholine	24850000	8.15655e+06	8756790	1.01062e+07	CPD-8157 [ C42 H82 N O8 P, tgt=68.25, overall=68.25 ]			(782.5619, 114741.99)(783.5646, 49040.07)(784.5665, 9500.969)(785.56793, 1876.2299)
1-linoleoyl-2-oleoyl-phosphatidylcholine	6.02552e+06	1.00994e+06	3.375e+06	1.71991e+06	CPD-8088 [ C44 H82 N O8 P, tgt=23.45, overall=23.45 ]			(783.5637, 56440.492)(784.56555, 11179.861)(785.5679, 461.96597)(768.5557, 19717.43)(769.5562, 9024.1)(770.5711, 23193.05)(771.5745, 8814.15)(770.5716, 40062.86)(771.5748, 15843.23)(806.55023, 695.14404)(791.55383, 133881.56)(793.0594, 138451.22)(794.06464, 71121.016)(794.56323, 17352.615)
1-oleoyl-2-linoleoyl-phosphatidylcholine	9.28148e+06	4.07619e+06	6.37473e+06	4.81987e+06	CPD-8091 [ C44 H82 N O8 P, tgt=23.45, overall=23.45 ]			(783.99567, 46497.523)(784.56647, 10676.473)(785.5679, 461.96597)(768.5557, 19717.43)(769.5562, 9024.1)(770.5711, 23193.05)(771.5745, 8814.15)(770.5707, 40575.965)(771.5737, 16160.471)(772.5832, 12790.01)(806.5568, 538.421)(790.6526, 37863.723)(792.502, 170090.25)(793.6705, 86926.41)(794.56, 21771.205)
3-methoxy-4-hydroxy-5-<i>all-trans</i>-nonaprenylbenzoate	1.27668e+06	1	280861	1	CPD-9898 [ C53 H79 O4, tgt=14.50, overall=14.50 ]			(784.56604, 25183.068)(785.568, 1891.3401)
isovitexin 2''-<i>O</i>-&beta;-<i>D</i>-glucosyl 7-<i>O</i>-galactoside /kaempferol 3-<i>O</i>-&beta;-<i>D</i>-glucosyl-(1->2)-&beta;-D-glucoside-7-<i>O</i>-&alpha;-L-rhamnoside / kaempferol-3-<i>O</i>-&beta;-gentiobioside-7-<i>O</i>-&alpha;-L-rhamnoside	671680	366171	387495	124650	CPD-18169 [ C33 H40 O20, tgt=24.23, overall=24.23 ]			(784.81384, 9317.568)(757.2095, 15062.521)(758.2124, 3847.7131)(759.2141, 1080.015)(765.2105, 349.77)
cyanidin-3-<i>O</i>-rutinoside-5-<i>O</i>-&beta;-D-glucoside	671680	366171	387495	235948	CPD-15002 [ C33 H40 O20, tgt=24.23, overall=24.23 ]			(784.8533, 9457.238)(757.2098, 14550.459)(758.2127, 3685.9124)(759.2141, 1080.015)(765.2105, 349.77)
1-oleoyl-2-oleoyl-phosphatidylcholine	2.11447e+06	1.54351e+06	1449117	1.76709e+06	CPD-2181 [ C44 H84 N O8 P, tgt=41.03, overall=41.03 ]			(786.5845, 3038.4766)(772.52026, 8969.398)(773.6043, 4888.172)(772.60254, 1001.16003)(773.6021, 534.21)(808.5817, 507.475)(794.06287, 128255.45)(795.0662, 51795.785)(796.0688, 22202.838)(795.5739, 40867.78)(796.5757, 8303.07)
(20<i>S</i>)-ginsenoside Rg3	1.40695e+07	2.26523e+07	7.87335e+06	2.65463e+06	CPD-12102 [ C42 H72 O13, tgt=55.90, overall=55.90 ]			(788.3669, 5694.9478)(789.5478, 6528.4507)(790.1363, 9738.709)(790.5125, 7476.5317)(789.5027, 8490.285)(790.5147, 3279.815)(791.5234, 1909.44)(773.2015, 75477.17)(773.26196, 57788.594)(773.511, 80584.77)(804.9303, 7639.946)(807.5295, 11170.476)(808.54504, 19279.334)(810.11176, 22645.96)(812.49426, 14429.129)(813.50494, 102020.52)(794.29553, 3565.515)(795.2977, 3478.884)(795.4968, 2123.99)
3-demethylubiquinol-9	1	1	1	62817.6	CPD-7158 [ C53 H82 O4, tgt=57.54, overall=57.54 ]			(788.60156, 15485.88)(789.6044, 5015.3896)
<i>all-trans</i>-nonaprenyl diphosphate	7.44071e+06	6.11144e+06	9705916	3871679	SOLANESYL-PYROPHOSPHATE [ C45 H73 O7 P2, tgt=70.05, overall=70.05 ]			(788.62384, 8548.32)(788.4895, 4622.1104)(789.503, 815.105)(769.5621, 153310.83)(770.48083, 66464.26)(771.48376, 18065.117)(772.486, 1383.4891)(773.7573, 1448.3451)(776.51996, 580.79333)(807.78143, 1154.9205)(808.5268, 870.25507)(807.5094, 582.56)(789.21375, 3106.6726)(790.01355, 2027.4812)(791.5369, 3060.7427)(793.5328, 3620.671)(813.0162, 2595.434)(814.6758, 1592.2983)(815.29297, 305.05402)(792…
3,4-dihydroxy-5-<i>all-trans</i>-nonaprenylbenzoate	3.9627e+06	2.40983e+06	2.90317e+06	661903	CPD-9896 [ C52 H77 O4, tgt=44.67, overall=44.67 ]			(794.568, 78163.93)(770.5662, 61109.035)(771.57104, 32378.057)(772.5677, 7383.8574)(773.5591, 564.71497)
oleanolate 3-&beta;-D-glucuronoside-28-glucoside	5909065	3.30548e+06	2.99527e+06	3.15656e+06	CPD-9462 [ C42 H65 O14, tgt=47.27, overall=47.27 ]			(797.7725, 8094.9146)(798.4402, 3398.5864)(799.45074, 19198.82)(777.0331, 922.6493)(780.4442, 514.735)(797.6611, 11566.837)(798.6638, 4576.11)(799.4509, 18603.668)(800.45447, 6867.5215)(779.4398, 1834.752)(780.4492, 619.9858)(782.42834, 213.02)(812.08026, 3300.5493)(814.4991, 4828.9697)(793.4792, 955.6562)(794.496, 28.17)(816.4493, 6404.0615)
oleanolate 3-beta-D-glucuronoside-(3,1)-galactoside	1.24406e+06	2.79163e+06	1.76774e+06	1.82859e+06	CPD-9461 [ C42 H64 O14, tgt=33.90, overall=33.90 ]			(798.0954, 5348.697)(798.4372, 5802.05)(777.0329, 1997.956)(780.10767, 920.3433)(780.445, 312.89)(797.7597, 10429.601)(798.4879, 7109.1772)(799.45056, 19568.865)(779.43665, 3763.5117)(780.44806, 723.6767)(814.6901, 9282.796)(816.1999, 10891.597)(816.47064, 8068.8525)(793.20435, 2444.3855)(793.4765, 1316.38)(817.44867, 9811.54)
monodeglucosyl des-acyl avenacin A	8.3466e+06	5.45274e+06	5.25351e+06	4.24437e+06	CPD-16625 [ C41 H66 O15, tgt=47.27, overall=47.27 ]			(798.7877, 8333.211)(800.4509, 7733.5303)(801.452, 13171.242)(802.45447, 4178.0273)(803.4696, 1209.693)(780.5565, 507.09778)(782.4253, 707.61)(783.4565, 4254.13)(784.4552, 2296.99)(799.4527, 18341.807)(800.4561, 6964.8354)(783.3109, 33784.207)(784.40393, 17574.799)(785.3838, 79930.44)(786.2733, 49707.52)(817.7698, 5071.761)(821.51056, 1000.30664)(799.26636, 16791.482)(800.45306, 7798.902)(801.465…
&alpha;-3',4'-anhydrovinblastine	859526	2573445	809742	58768.4	CPD-13001 [ C46 H58 N4 O8, tgt=51.79, overall=51.79 ]			(798.9404, 9545.425)(800.3446, 4354.531)(800.4389, 229.68)(778.0033, 4843.08)(779.00616, 1839.2439)(780.41565, 1863.0775)(799.9447, 1173.3025)(801.4524, 2852.24)(783.22797, 112300.85)(779.4194, 891.55)(780.4386, 819.42)(815.4461, 4268.5615)(816.6179, 1986.6398)(817.6268, 3225.235)(818.4624, 1452.6475)(820.4344, 738.43)
1,2-dipalmitoyl-phosphatidylglycerol-phosphate	1.73763e+07	7.20432e+06	9.81899e+06	2.68282e+06	CPD-12821 [ C38 H73 O13 P2, tgt=64.54, overall=64.54 ]			(799.45056, 23356.018)(800.4539, 9258.531)(782.0899, 724.38995)(783.4287, 282.64502)(784.4407, 500.48)(784.9878, 57076.363)(785.755, 26630.092)(786.6291, 43505.695)(787.53815, 17840.443)(787.59564, 14310.81)(788.4884, 3033.57)(820.0881, 5171.8267)(820.91327, 1324.4022)(821.61475, 343.86502)(822.5249, 220.06)(801.59576, 43626.0)(802.732, 17282.166)(803.4748, 8082.345)(804.6011, 1069.9442)(805.4965…
soyasaponin III	13912500	1.07758e+07	1.12808e+07	6.53898e+06	CPD-13254 [ C42 H67 O14, tgt=50.60, overall=50.60 ]			(799.5776, 6927.3237)(800.44635, 2117.8628)(801.4557, 2403.1658)(783.45764, 93532.03)(783.456, 99203.64)(784.4586, 40749.05)(813.5052, 220301.16)(814.5079, 99522.62)(815.5095, 26683.258)(816.51355, 4626.601)(817.5153, 390.4975)(795.49774, 230.68834)(800.4417, 1376.49)
ginsenoside Rg1	6.77672e+06	6.70154e+06	4.92024e+06	6.91327e+06	CPD-15445 [ C42 H72 O14, tgt=64.53, overall=64.53 ]			(804.5463, 5978.5933)(804.6128, 1024.4387)(805.50055, 3977.6843)(806.51117, 1337.5115)(785.4713, 6904.835)(786.47504, 3263.6401)(787.48364, 3752.655)(788.4901, 724.33997)(805.4966, 2966.1924)(806.50616, 933.28754)(786.20544, 8410.45)(787.20905, 3241.5376)(787.9343, 5421.5137)(788.494, 1556.3943)(789.5009, 386.14)(823.25916, 3492.8916)(824.5425, 11361.353)(826.4539, 6718.37)(827.69653, 9365.235)(8…
vinblastine	686915	2462739	971518	707697	CPD-7858 [ C46 H60 N4 O9, tgt=52.94, overall=52.94 ]			(815.28937, 14212.943)(816.3712, 6829.279)(817.3817, 20263.492)(818.38605, 8980.088)(818.4621, 4763.19)(798.4264, 189.08)(800.4419, 1326.92)(799.00287, 20760.23)(800.2882, 9052.921)(801.07916, 22699.238)(800.4532, 17877.068)(801.46564, 62117.926)(831.4431, 6156.0225)(832.6735, 891.65326)(833.91785, 5059.948)(834.49347, 2921.0679)(815.448, 5757.665)(816.45605, 1961.9625)(817.4635, 17113.633)(818.4…
3,4-dihydroxy-5-<i>all-trans</i>-decaprenylbenzoate	479324	494164	691025	491567	CPD-9895 [ C57 H85 O4, tgt=46.86, overall=46.86 ]			(816.6305, 28949.125)(817.6332, 11398.754)(818.63544, 5280.6543)(860.6566, 33679.137)(861.65936, 13919.821)(862.66174, 6764.101)(863.6627, 287.5)(838.6067, 6764.918)(839.6094, 2590.775)
3-decaprenyl-4-hydroxybenzoate	1	1	1	278518	CPD-9864 [ C57 H85 O3, tgt=12.19, overall=12.19 ]			(817.6377, 28140.686)(818.63904, 5451.555)
phosphatidylglycerophosphate (1-octadecenoyl(9Z), 2-palmitoyl)	1.85094e+06	1501043	2.20977e+06	1.54889e+06	CPDQT-520 [ C40 H75 O13 P2, tgt=56.14, overall=56.14 ]			(826.2589, 6875.1245)(827.66583, 3357.3044)(829.4824, 10017.73)(830.4818, 2264.18)(831.5016, 858.22)(810.05383, 508.7271)(810.8888, 565.028)(811.4898, 154.71)(811.7111, 3313.2698)(813.1412, 2514.61)(813.5024, 34951.33)(814.5052, 58066.94)(844.00287, 2654.991)(845.08856, 5094.825)(846.4943, 3416.1008)(847.4961, 1730.0824)(848.4925, 2631.0984)(827.2567, 4854.369)(828.493, 2326.1414)(829.4964, 67312…
uroporphyrinogen-I / uroporphyrinogen-III	1.28546e+06	1.21495e+06	1.36137e+06	619032	CPD-11444 [ C40 H36 N4 O16, tgt=41.64, overall=41.64 ]			(832.2321, 29734.627)(833.2326, 22990.467)(834.23083, 19194.594)(832.2298, 33249.152)(833.23047, 25659.084)(834.2287, 21374.9)(837.05743, 693.0983)
UDP-3-<i>O</i>-[(3<i>R</i>)-3-hydroxymyristoyl]-<i>N</i>-acetyl-&alpha;-D-glucosamine	404914	429429	1.81384e+06	1	UDP-OHMYR-ACETYLGLUCOSAMINE [ C31 H51 N3 O19 P2, tgt=5.68, overall=5.68 ]			(836.2264, 3385.1602)(837.2239, 327.8867)
sirohydrochlorin	14146	14360.5	62743.6	1	SIROHYDROCHLORIN [ C42 H38 N4 O16, tgt= ]			(836.2264, 6837.635)(837.2239, 660.76337)
decaprenyl diphosphate	1.01949e+06	613843	524219	400757	CPDQT-22 [ C50 H84 O7 P2, tgt=12.19, overall=12.19 ]			(841.27936, 6298.849)(841.9134, 1937.7078)(842.53735, 883.15)(842.9177, 3854.8486)(843.55237, 1566.1262)
vincristine	528388	422281	367079	1	CPD-19894 [ C46 H56 N4 O10, tgt=41.48, overall=41.48 ]			(842.45734, 23366.512)(843.45996, 9991.89)(844.46185, 2066.7766)(852.4101, 722.72)
&alpha;-chaconine	352262	208990	196648	305455	CPD-9214 [ C45 H74 N O14, tgt=49.11, overall=49.11 ]			(856.51654, 29683.15)(857.5196, 13430.166)(858.5207, 3465.0398)(839.7034, 1554.2257)(840.4978, 765.79004)(856.5132, 31024.143)(857.51624, 14096.0625)(858.5173, 3734.2603)
all-<i>trans</i>-decaprenyl diphosphate	1.18145e+06	625641	1.06062e+06	758123	CPD-9610 [ C50 H81 O7 P2, tgt=43.55, overall=43.55 ]			(856.55994, 4130.5615)(857.5667, 1244.08)(838.7407, 5933.0244)(839.77356, 3213.7227)(840.7822, 2551.219)(841.5378, 2465.38)(839.05743, 9676.969)(840.0611, 3029.3564)(841.107, 1500.4358)(843.5443, 81.735)(875.0781, 33112.293)(874.572, 6267.045)(857.2432, 3895.8098)(858.58936, 1182.085)(878.88544, 1129.2471)(881.5203, 1240.42)(882.5259, 319.1)(864.42175, 5821.203)(862.52185, 4998.0083)(866.5205, 33…
crotonyl-CoA / methylacrylyl-CoA	1	1	1	29298	CROTONYL-COA [ C25 H36 N7 O17 P3 S, tgt=11.19, overall=11.19 ]			(858.0944, 1228.285)(836.08093, 3208.42)
ferroheme <i>o</i>	1	62857.2	1	1	CPD-17063 [ C49 H56 Fe N4 O5, tgt= ]			(859.385, 5475.9297)(860.3873, 576.47)
dihydrogeranylgeranyl chlorophyll a	901622	1.08263e+06	1.47789e+06	1.18082e+06	CPD-7004 [ C55H67MgN4O5, tgt= ]			(870.4739, 3755.1167)(871.47565, 1566.8241)(872.4898, 22983.686)(873.4922, 9320.728)(874.49414, 1516.5256)(900.4831, 472.15286)
pheophytin a	46425000	12787500	25650000	16412500	CPD-8155 [ C55 H74 N4 O5, tgt=61.05, overall=61.05 ]			(870.55316, 2113.694)(871.5648, 287153.7)(872.5676, 167275.1)(873.5693, 43044.78)(874.5707, 6100.382)(871.5686, 175496.3)(872.57135, 99524.55)(873.5731, 24912.87)(874.5754, 3512.045)(893.545, 13768.494)(894.5478, 7079.8438)(895.54944, 1786.4601)
pheophytin b	1.58875e+07	14000000	1.47125e+07	20137500	CPD-8178 [ C55H72N4O6, tgt= ]			(871.5614, 3477.39)(872.564, 1840.42)(873.5655, 443.88)(907.525, 33844.277)(908.5275, 18698.457)(909.53156, 5236.794)(870.79956, 14829.806)(872.048, 12418.926)(873.05194, 8729.541)(873.78143, 5112.855)(874.1704, 2042.418)(874.5713, 684.4525)(903.5554, 2174.17)(904.5586, 1040.4)(885.54474, 114926.52)(886.54724, 64245.445)(887.5515, 22450.494)(888.5557, 4629.1807)(893.5448, 1164.1028)(894.5478, 784…
protochlorophyll a	5928349	4.93749e+06	5.86116e+06	7.44419e+06	CPD-8177 [ C55H71N4O5, tgt= ]			(871.56793, 14669.705)(872.5707, 8148.535)(873.5724, 1905.26)(874.5752, 326.98)(888.09766, 9151.688)(888.5625, 6305.592)(889.5633, 1045.2539)(871.20844, 24991.775)(872.21265, 17585.205)(873.21606, 9928.03)(874.10944, 4572.727)(874.07074, 3138.435)(874.5719, 837.79004)(893.54474, 1594.6361)(894.54736, 885.6999)(895.5493, 198.19666)(877.53674, 3552.771)(878.5397, 692.5427)
&alpha;-solanine	5.40267e+06	2175036	4.4411e+06	1.35309e+06	CPD-9211 [ C45 H74 N O15, tgt=58.44, overall=58.44 ]			(872.4929, 26112.742)(873.49536, 11087.076)(874.4973, 1907.7743)(886.5462, 68792.59)(887.551, 26703.34)(888.5552, 6505.062)(889.56067, 1239.47)(870.3137, 2515.0903)(871.9416, 2926.412)(873.6233, 2339.908)(873.76886, 2738.282)(874.0702, 1339.2051)(874.5705, 346.59)
tetrahydrogeranylgeranyl chlorophyll <i>a</i>	2.6964e+06	1.61229e+06	2.48737e+06	2.7226e+06	CPD-7006 [ C55 H69 Mg N4 O5, tgt=28.34, overall=28.34 ]			(893.5432, 1002.5116)(894.6576, 537.49554)(871.4792, 826.4)(893.54504, 2786.62)(894.548, 1453.4299)(895.54974, 236.91)(872.4928, 25205.305)(873.4954, 10210.195)(874.4973, 1669.1174)(907.5243, 35060.484)(908.52673, 19390.768)(909.5309, 5674.7554)(891.95233, 1627.4819)(894.5501, 1143.1838)(914.4829, 4153.02)(915.4853, 1879.72)(916.4875, 282.36)(901.99884, 7038.935)(902.5027, 12551.21)
chlorophyll <i>a</i>	1.00051e+06	501753	534364	510151	CHLOROPHYLL-A [ C55 H71 Mg N4 O5, tgt=59.53, overall=59.53 ]			(893.5435, 15565.304)(894.5463, 8023.5703)(895.54944, 2022.94)(891.5524, 6602.801)(892.55554, 2285.7559)(921.5579, 605.05)
geranylgeranyl chlorophyll b	746218	1.13614e+06	472515	586438	CPD-7013 [ C55 H64 Mg N4 O6, tgt=40.63, overall=40.63 ]			(905.13104, 8557.93)(906.1343, 3354.7698)(887.48364, 1069.4)(888.4931, 639.24664)(908.20624, 7102.919)(903.50165, 9465.725)(907.4593, 18979.55)(908.4624, 7865.25)(909.468, 3032.78)(891.4824, 5017.66)(920.50574, 7602.4663)(921.50757, 3377.7354)(925.52264, 667.10333)(903.87115, 11137.904)(904.6681, 5895.5337)(905.9717, 2385.081)(905.5131, 530.85)(925.4677, 629.78)(907.453, 13594.1)(908.4563, 5293.9…
cyanidin <i>O</i>-O-[6-<i>O</i>-(6-<i>O</i>-4-hydroxycinnamoyl-&beta;-D-glucosyl)-2-<i>O</i>-&beta;-D-xylosyl-&beta;-D-galactoside]	917869	1.04177e+06	1.14107e+06	893673	CPD-15000 [ C41 H43 O22, tgt=16.26, overall=16.26 ]			(906.24963, 24907.293)(907.25037, 21398.72)(908.2488, 18935.098)(909.24786, 8665.603)(910.2473, 3021.885)(911.2489, 349.02)(911.2421, 605.42)
chlorophyll <i>b</i>	2.00861e+06	988020	1.63918e+06	1.239e+06	CHLOROPHYLL-B [ C55 H70 Mg N4 O6, tgt=62.10, overall=62.10 ]			(907.5139, 11248.567)(908.515, 6595.581)(909.51404, 2070.4048)
geranylgeranyl chlorophyll <i>a</i>	1.09109e+07	5.05862e+06	9747639	1.28518e+06	CPD-7005 [ C55 H65 Mg N4 O5, tgt=66.99, overall=66.99 ]			(907.521, 24939.947)(908.5228, 13711.074)(909.5258, 4269.052)(893.54315, 1061.9131)
octanoyl-CoA	517673	740521	200883	1.26677e+06	CPD-196 [ C29 H46 N7 O17 P3 S, tgt=36.25, overall=36.25 ]			(908.37537, 17153.82)(909.3747, 7739.6064)(910.248, 2882.385)(911.245, 346.21747)
cyanidin 3-<i>O</i>-glucoside-7-<i>O</i>-(6-<i>O</i>-(4-<i>O</i>-(glucosyl)-oxybenzoyl)-glucoside) / delphinidin 3-<i>O</i>-rutinoside-7-<i>O</i>-(6-<i>O</i>-(p-hydroxybenzoyl)-glucoside)	46555.6	101380	121102	43641.6	CPD-16603 [ C40 H44 O23, tgt= ]			(910.2464, 7026.0215)(911.2437, 1004.9272)
1-18:1-2-16:0-digalactosyldiacylglycerol	153666	27715.5	193137	343445	CPD-8160 [ C49 H90 O15, tgt=17.93, overall=17.93 ]			(918.619, 5682.965)(919.6217, 1586.6443)(936.64856, 2130.3584)
1-16:0-2-18:2-digalactosyldiacylglycerol / 1-18:2-2-16:0-digalactosyldiacylglycerol	930672	836759	886761	542328	CPD-8163 [ C49 H88 O15, tgt=41.21, overall=41.21 ]			(918.62085, 6059.2725)(919.62366, 1759.475)(934.7602, 21233.736)(935.6371, 10288.487)(936.63934, 1934.3344)(939.58826, 4142.2563)(940.5925, 1323.525)(923.5765, 3273.6975)(924.578, 406.2)
1-18:3-2-18:3-digalactosyldiacylglycerol	25200000	23175000	21462500	20712500	CPD-8081 [ C51 H84 O15, tgt=58.36, overall=58.36 ]			(920.5971, 697.6641)(926.5708, 509.01)(954.6072, 334170.12)(955.6099, 184101.69)(956.6117, 51983.72)(957.6128, 8844.978)(958.6123, 291.87)(959.56055, 53299.117)(960.56335, 26554.56)(961.56555, 6296.884)
1-18:3-2-16:0-digalactosyldiacylglycerol	4.07997e+06	6.63761e+06	4.01945e+06	8.98192e+06	CPD-8162 [ C49 H86 O15, tgt=64.45, overall=64.45 ]			(932.62305, 184527.94)(933.62573, 91529.93)(934.6265, 24798.46)(935.62695, 3710.8564)(937.5764, 32713.062)(938.57916, 15496.233)(939.58026, 3326.6296)(919.58093, 14597.136)(920.58386, 7637.6055)(921.5851, 1125.4537)
1-16:0-2-18:3-digalactosyldiacylglycerol	237521	60486.9	222541	8.98192e+06	CPD-8164 [ C49 H86 O15, tgt=64.45, overall=64.45 ]			(932.6253, 191796.84)(933.6279, 94534.11)(934.62866, 25859.262)(935.62897, 3882.4187)(937.57874, 31782.184)(938.58136, 14962.547)(939.5824, 3232.5713)(919.58093, 14597.136)(920.58386, 7637.6055)(921.5851, 1125.4537)
quercetin-3-gentiotetraside	574339	1	126299	1	CPD-14822 [ C39 H50 O27, tgt= ]			(933.254, 15336.734)(934.25684, 5531.5527)(935.2586, 577.85)(933.2562, 70498.14)(934.25867, 28617.936)(935.26013, 6893.1953)(973.2451, 838.815)
1-18:2-2-18:3-digalactosyldiacylglycerol	93858.9	71666.6	103412	281742	CPD-8083 [ C51 H86 O15, tgt=56.79, overall=56.79 ]			(938.5819, 15530.205)(939.5825, 3657.175)(920.5855, 9521.54)(921.5861, 1245.24)(956.6168, 1076.88)(963.5939, 288.365)(944.60144, 621.795)
1-18:3-2-18:2-digalactosyldiacylglycerol	484897	194106	103412	492342	CPD-8084 [ C51 H86 O15, tgt=56.79, overall=56.79 ]			(938.867, 13169.125)(939.86865, 3022.477)(920.5867, 10726.69)(921.58746, 1602.1271)(956.95013, 5102.425)(958.62494, 3794.7249)(958.6203, 251.27)(963.1859, 1372.1101)(944.60144, 621.795)
1-18:2-2-18:2-digalactosyldiacylglycerol	264050	250466	267518	182673	CPD-8082 [ C51 H88 O15, tgt=34.07, overall=34.07 ]			(943.8458, 1309.4506)(941.5888, 2108.35)(944.6011, 1325.985)(958.7143, 11851.551)(959.715, 5793.969)(960.6359, 818.242)(963.71484, 1198.7556)(946.59784, 5173.65)(947.6004, 1590.02)(948.61316, 1357.52)
ginsenoside Rd	543093	567458	635046	511325	CPD-9249 [ C48 H82 O18, tgt=49.49, overall=49.49 ]			(952.5857, 3207.9065)(953.5886, 1133.59)(935.5594, 1823.3475)(935.5612, 2469.0283)(936.5639, 854.6909)(964.6079, 7959.195)(965.61017, 2969.5193)(966.6121, 116.329994)(952.5873, 1116.5477)(953.58966, 297.59918)(971.42694, 4318.706)(974.54126, 2570.188)(975.554, 14776.918)(976.5585, 8367.133)
soyasaponin I	3.44629e+06	2809434	2.67199e+06	2.45215e+06	CPD-13255 [ C48 H77 O18, tgt=47.43, overall=47.43 ]			(959.56055, 50702.86)(960.56335, 25274.502)(961.56604, 6207.613)
oleanolate 3-beta-D-glucuronoside-(3,1)-galactoside-28-glucoside	318800	378528	323931	223955	CPD-9464 [ C48 H75 O19, tgt=37.14, overall=37.14 ]			(973.538, 10299.187)(974.54095, 4314.107)(975.5504, 1097.5782)
ginsenoside Ro	318800	378528	323931	368551	CPD-15576 [ C48 H75 O19, tgt=37.14, overall=37.14 ]			(973.538, 10299.187)(974.54095, 4314.107)(975.5504, 1097.5782)(955.5344, 5742.4434)(956.5374, 2633.05)
oleanolate-3-beta-D-glucuronoside-(3,1)-galactoside-(4,1)-glucoside	227486	265395	227412	233213	CPD-9469 [ C48 H74 O19, tgt=36.76, overall=36.76 ]			(973.538, 9890.679)(974.54095, 4139.569)(975.55023, 1389.2695)(955.5344, 5742.4434)(956.5374, 2633.05)
(9Z,12Z)-hexadeca-9,12-dienoyl-CoA	1.77789e+06	1895150	2.00618e+06	1657902	CPD-10254 [ C37 H58 N7 O17 P3 S, tgt=32.06, overall=32.06 ]			(980.26807, 27181.777)(981.269, 25855.12)(982.26733, 23919.418)(983.26685, 12020.305)(984.2651, 5145.213)(985.26227, 1379.5186)
7-hydroxylauroyl-CoA	865701	1.20218e+06	1274824	1.04304e+06	CPD-17638 [ C33 H54 N7 O18 P3 S, tgt=21.11, overall=21.11 ]			(980.26825, 31091.352)(981.26917, 29545.242)(982.2676, 27341.242)(983.2669, 14357.549)(984.2652, 6174.0312)(985.2627, 1689.2108)
cyanidin 3-<i>O</i>-[2\-<i>O</i>-(xylosyl)-6\"-<i>O</i>-(p-coumaroyl) glucoside] 5-<i>O</i>-malonylglucoside"	1.29084e+06	1.09189e+06	1.92896e+06	218208	CPD-16538 [ C44 H47 O25, tgt=18.81, overall=18.81 ]			(980.2708, 20583.77)(981.2716, 19387.639)(982.27014, 17918.594)(980.2666, 27920.297)(981.26746, 26613.621)(982.2659, 24570.902)(985.26086, 1515.6318)
palmitoleoyl-CoA	2.04286e+06	1.10258e+06	2.02846e+06	1.62961e+06	CPD-10269 [ C37 H60 N7 O17 P3 S, tgt=9.92, overall=9.92 ]			(981.2694, 27900.361)(982.2678, 25839.908)(983.2673, 13347.444)(984.265, 5406.531)(985.2623, 1395.8146)
3-oxo-2-(cis-2'-pentenyl)-cyclopentane-1-(E-buta-2-enoyl)-CoA	2.31105e+06	1.13393e+06	1.26444e+06	1.90746e+06	CPD-11526 [ C35 H50 N7 O18 P3 S, tgt=41.35, overall=41.35 ]			(982.6845, 19223.72)(983.6834, 9265.278)(984.53766, 3977.497)(985.2621, 1328.8401)
3-oxo-2-(cis-2'-pentenyl)-cyclopentane-1-butanoyl-CoA	1131791	1.23344e+06	1.31737e+06	1.06597e+06	CPD-11525 [ C35 H52 N7 O18 P3 S, tgt=39.64, overall=39.64 ]			(983.2669, 16752.934)(984.2651, 7448.497)(985.26227, 1993.8704)
CDP-1-18:1(9Z)-2-16:0-glycerol	242930	246860	186476	137695	CPDQT-518 [ C46 H81 N3 O15 P2, tgt=65.24, overall=65.24 ]			(995.5431, 11074.066)(996.5461, 4964.7524)(997.54376, 2029.65)
&alpha; -ethynylagmatine	1	1	1	1	CPD0-1660 [ C7 H14 N4, tgt= ]
&alpha;-(2,6-anhydro-3-deoxy-D-arabino-heptulopyranosid)onate 7-phosphonate	1	1	1	1	CPD0-1372 [ C7 H14 O8 P, tgt= ]
&alpha;,&alpha;-trehalose 6-phosphate	1	1	1	1	TREHALOSE-6P [ C12 H21 O14 P, tgt= ]
&beta;-citraurin	1	1	1	1	CPD-17216 [ C30 H40 O2, tgt= ]
&beta;-fenchene	1	1	1	1	CPD-12223 [ C12H20, tgt= ]
&beta;-ionone	1	1	1	1	CPD-7204 [ C13 H20 O, tgt= ]
&gamma;-L-glutamyl-(<i>S</i>)-2-carboxypropyl-L-cysteine	1	1	1	1	CPD-17438 [ C12 H18 N2 O7 S, tgt= ]
&gamma;-L-glutamyl-(<i>S</i>)-methyl-L-cysteine	1	1	1	1	CPD-17447 [ C9 H15 N2 O5 S, tgt= ]
(-)-4'-demethyl-epipodophyllotoxin	1	1	1	1	CPD-18757 [ C21 H20 O8, tgt= ]
(-)-9&beta;-pimara-7,15-diene	1	1	1	1	CPD-4754 [ C20 H32, tgt= ]
(-)-cuparene	1	1	1	1	CPD-8244 [ C15 H22, tgt= ]
(-)-curcuquinone	1	1	1	1	CPD-9877 [ C15H20O2, tgt= ]
(-)-maackiain-3-<i>O</i>-glucoside	1	1	1	1	CPD-4222 [ C22 H22 O10, tgt= ]
(+)-6a-hydroxymaackiain	1	1	1	1	CPD-3942 [ C16 H12 O6, tgt= ]
(+)-isopimara-7,15-diene	1	1	1	1	CPD-8699 [ C20 H32, tgt= ]
(+)-sesamolinol	1	1	1	1	CPD-8927 [ C20 H20 O7, tgt= ]
(<i>E</i>)-&omega;-(methylsulfanyl)heptyl-thiohydroximate	1	1	1	1	CPDQT-413 [ C8 H17 N O S2, tgt= ]
(<i>E</i>)-&omega;-(methylsulfanyl)hexyl-thiohydroximate	1	1	1	1	CPDQT-412 [ C7 H15 N O S2, tgt= ]
(<i>E</i>)-&omega;-(methylsulfanyl)octyl-thiohydroximate	1	1	1	1	CPDQT-414 [ C9 H19 N O S2, tgt= ]
(<i>E</i>)-1-(glutathion-<i>S</i>-yl)-<i>N</i>-hydroxy-&omega;-(methylsulfanyl)butan-1-imine	1	1	1	1	CPD-12390 [ C15 H25 N4 O7 S2, tgt= ]
(<i>E</i>)-1-(glutathion-<i>S</i>-yl)-<i>N</i>-hydroxy-&omega;-(methylsulfanyl)hexan-1-imine	1	1	1	1	CPD-12396 [ C17 H29 N4 O7 S2, tgt= ]
(<i>E</i>)-1-(glutathion-<i>S</i>-yl)-<i>N</i>-hydroxy-2-(1<i>H</i>-indol-3-yl)ethan-1-imine	1	1	1	1	CPD-12387 [ C20 H24 N5 O7 S, tgt= ]
(<i>E</i>)-1-(L-cystein-<i>S</i>-yl)-<i>N</i>-hydroxy-&omega;-(methylsulfanyl)octan-1-imine	1	1	1	1	CPDQT-409 [ C12 H24 N2 O3 S2, tgt= ]
(<i>E</i>)-1-(L-cystein-<i>S</i>-yl)-<i>N</i>-hydroxy-2-(1<i>H</i>-indol-3-yl)ethan-1-imine	1	1	1	1	CPD-7547 [ C13 H15 N3 O3 S, tgt= ]
(<i>E</i>)-1-(L-cysteinylglycin-<i>S</i>-yl)-<i>N</i>-hydroxy-&omega;-(methylsulfanyl)hexan-1-imine	1	1	1	1	CPD-12397 [ C12 H23 N3 O4 S2, tgt= ]
(<i>E</i>)-2-pentenal	1	1	1	1	CPD-13228 [ C5H8O, tgt= ]
(<i>R</i>)-2,3-dihydroxy-3-methylpentanoate	1	1	1	1	1-KETO-2-METHYLVALERATE [ C6 H11 O4, tgt= ]
(<i>R</i>)-3-hydroxyoctanoyl-CoA	1	1	1	1	CPD-14916 [ C29 H46 N7 O18 P3 S, tgt= ]
(<i>R</i>)-5-phosphomevalonate	1	1	1	1	CPD-499 [ C6 H10 O7 P, tgt= ]
(<i>R</i>)-coclaurine	1	1	1	1	R-COCLAURINE [ C17H20NO3, tgt= ]
(<i>R</i>)-laudanine	1	1	1	1	CPD-15937 [ C20 H26 N O4, tgt= ]
(<i>R</i>)-mevalonate	1	1	1	1	MEVALONATE [ C6 H11 O4, tgt= ]
(<i>R</i>)-pantolactone	1	1	1	1	PANTOYL-LACTONE [ C6 H10 O3, tgt= ]
(<i>R</i>)-pantothenate	1	1	1	1	PANTOTHENATE [ C9 H16 N O5, tgt= ]
(<i>S</i>)-<i>N</i>-methylcoclaurine	1	1	1	1	S-N-METHYLCOCLAURINE [ C18H22NO3, tgt= ]
(<i>S</i>)-laudanine	1	1	1	1	CPD-8924 [ C20 H26 N O4, tgt= ]
(<i>S</i>)-usnate	1	1	1	1	CPD-7411 [ C18 H14 O7, tgt= ]
(<i>Z,Z</i>)-bilirubin-IX &alpha;	1	1	1	1	BILIRUBIN [ C33 H34 N4 O6, tgt= ]
(<i>Z</i>)-1-(L-cysteinyglycin-<i>S</i>-yl)-<i>N</i>-hydroxy-2-phenylethan-1-imine	1	1	1	1	CPD-12385 [ C13 H17 N3 O4 S, tgt= ]
(1<i>R</i>,6<i>R</i>)-6-hydroxy-2-succinylcyclohexa-2,4-diene-1-carboxylate	1	1	1	1	CPD-9923 [ C11 H10 O6, tgt= ]
(1<i>S</i>,6<i>R</i>)-2-succinyl-6-hydroxy-2,4-cyclohexadiene-1-carboxylate	1	1	1	1	SUCCINYL-OH-CYCLOHEXADIENE-COOH [ C11 H10 O6, tgt= ]
(11<i>R</i>)-dihydroartemisinic aldehyde	1	1	1	1	CPD-7558 [ C15 H24 O, tgt= ]
(11Z,14Z)-3-oxoicosadienoyl-CoA	1	1	1	1	CPD-17346 [ C41H64N7O18P3S, tgt= ]
(13<i>E</i>)-labda-7,13-dien-15-ol	1	1	1	1	CPD-13929 [ C20 H34 O, tgt= ]
(1E,2S)-2-methylbutanal oxime	1	1	1	1	CPD-10273 [ C5 H11 N O, tgt= ]
(1E,6E)-1-(4-hydroxyphenyl)-7-phenylhepta-1,6-diene-3,5-dione	1	1	1	1	CPD-12207 [ C19 H16 O3, tgt= ]
(1H-indol-3-yl)-<i>N</i>-methylmethanamine	1	1	1	1	CPD-8914 [ C10 H13 N2, tgt= ]
(1Z,2S)-2-methylbutanal oxime	1	1	1	1	CPD-10274 [ C5 H11 N O, tgt= ]
(2<i>E</i>)-oct-2-enoyl-CoA	1	1	1	1	CPD0-2108 [ C29 H44 N7 O17 P3 S, tgt= ]
(2<i>E</i>,6<i>E</i>)-farnesal	1	1	1	1	2-TRANS6-TRANS-FARNESAL [ C15 H24 O, tgt= ]
(2<i>S</i>)-sakuranetin	1	1	1	1	CPD-7079 [ C16 H14 O5, tgt= ]
(2-hydroxyphenyl)acetate	1	1	1	1	CPD-11495 [ C8 H7 O3, tgt= ]
(2R,3S)-2,7-dihydroxy-4'-methoxyisoflavanone	1	1	1	1	CPD-3502 [ C16 H14 O5, tgt= ]
(2S,3R,6S)-3-fluoro-2,6-diaminopimelate	1	1	1	1	CPD0-1501 [ C7 H13 F N2 O4, tgt= ]
(2S,5R)-2-(2-hydroxypropan-2-yl)-5,9-dimethyl-1-oxaspiro[5.5]undec-8-ene-7,10-dione	1	1	1	1	CPD-9884 [ C15 H22 O4, tgt= ]
(2Z)-3-(3,4-dioxocyclohexa-1,5-dien-1-yl)prop-2-enoate	1	1	1	1	CPD-8094 [ C9 H5 O4, tgt= ]
(3<i>R</i>)-3-hydroxybehenoyl-CoA	1	1	1	1	CPD-14276 [ C43 H74 N7 O18 P3 S, tgt= ]
(3E)-phytochromobilin	1	1	1	1	CPD-15004 [ C33 H34 N4 O6, tgt= ]
(3R)-sophorol	1	1	1	1	CPD-3630 [ C16 H12 O6, tgt= ]
(3R)-vestitone	1	1	1	1	VESTITONE [ C16 H14 O5, tgt= ]
(3R,4R)-3-(6-hydroxy-1,3-benzodioxol-5-yl)-3,4-dihydro-2H-chromene-4,7-diol	1	1	1	1	CPD-14741 [ C16 H14 O6, tgt= ]
(3R,4R)-7,2,4,2'-tetrahydroxy-4',5'-methylenedioxyisoflav-3-ene	1	1	1	1	CPD-20039 [ C16 H14 O7, tgt= ]
(3Z)-phytochromobilin	1	1	1	1	3Z-PHYTOCHROMOBILIN [ C33 H34 N4 O6, tgt= ]
(4E,8E)-sphinga-4,8-dienine	1	1	1	1	CPD-8427 [ C18H36NO2, tgt= ]
(5&alpha;)-campestan-3-one	1	1	1	1	CPD-709 [ C28 H48 O, tgt= ]
(6&alpha;)-hydroxycampestanol	1	1	1	1	CPD-711 [ C28H50O2, tgt= ]
(6<i>R</i>)-L-<i>erythro</i>-5,6,7,8-tetrahydrobiopterin	1	1	1	1	CPD-14053 [ C9H15N5O3, tgt= ]
(6E,10E)-geranyllinalool	1	1	1	1	CPD-8848 [ C20 H34 O, tgt= ]
(7,8-dihydropterin-6-yl)methyl diphosphate	1	1	1	1	DIHYDROPTERIN-CH2OH-PP [ C7 H8 N5 O8 P2, tgt= ]
(7R)-<i>trans</i>-hinokiresinol	1	1	1	1	CPD-17607 [ C17 H16 O2, tgt= ]
(7S)-<i>cis</i>-hinokiresinol	1	1	1	1	CPD-17604 [ C17 H16 O2, tgt= ]
(7S)-<i>trans</i>-hinokiresinol	1	1	1	1	CPD-17606 [ C17 H16 O2, tgt= ]
(9R,10S)-dihydroxystearate	1	1	1	1	CPD-10515 [ C18 H35 O4, tgt= ]
(indol-3-yl)acetyl-glycine	1	1	1	1	CPD-11226 [ C12 H11 N2 O3, tgt= ]
(indol-3-yl)acetyl-L-alanine	1	1	1	1	INDOLE-3-ACETYL-ALA [ C13 H13 N2 O3, tgt= ]
(indol-3-yl)acetyl-L-proline	1	1	1	1	CPD-11231 [ C15 H15 N2 O3, tgt= ]
(R)-4'-phosphopantothenoyl-L-cysteine	1	1	1	1	R-4-PHOSPHOPANTOTHENOYL-L-CYSTEINE [ C12 H20 N2 O9 P S, tgt= ]
(R)-pantoate	1	1	1	1	L-PANTOATE [ C6 H11 O4, tgt= ]
(S)-4-amino-5-oxopentanoate	1	1	1	1	GLUTAMATE-1-SEMIALDEHYDE [ C5 H9 N O3, tgt= ]
(S)-colchicine	1	1	1	1	CPD-9785 [ C22 H25 N O6, tgt= ]
(S)-magnoflorine	1	1	1	1	CPD-9936 [ C20H24NO4, tgt= ]
(S)-nandinine	1	1	1	1	CPD-16783 [ C19 H19 N O4, tgt= ]
(S)-tetrahydropapaverine	1	1	1	1	CPD-15798 [ C20 H26 N O4, tgt= ]
[(4S)-4-(5,5-dimethylcyclohex-1-en-1-yl)-cyclohex-1-en-1-yl] methanol	1	1	1	1	CPD-13626 [ C15 H24 O, tgt= ]
<i>(2S)</i>-2-amino-3-oxo-4-phosphooxybutanoate	1	1	1	1	2-AMINO-3-OXO-4-PHOSPHONOOXYBUTYRATE [ C4 H6 N O7 P, tgt= ]
<i>all-trans</i>-retinal	1	1	1	1	RETINAL [ C20 H28 O, tgt= ]
<i>cis</i>-tuberonic acid	1	1	1	1	CPD-11260 [ C12H17O4, tgt= ]
<i>cis</i>-vaccenate	1	1	1	1	CPD-9247 [ C18 H33 O2, tgt= ]
<i>ent</i>-cassa-12,15-diene	1	1	1	1	CPD-4751 [ C20 H32, tgt= ]
<i>ent</i>-isokaurene	1	1	1	1	CPD-11534 [ C20 H32, tgt= ]
<i>ent</i>-kaurene	1	1	1	1	CPD1F-128 [ C20 H32, tgt= ]
<i>ent</i>-pimara-8(14),15-diene	1	1	1	1	CPD-7097 [ C20 H32, tgt= ]
<i>ent</i>-sandaracopimaradiene	1	1	1	1	CPD-4753 [ C20 H32, tgt= ]
<i>N</i>-&beta;-D-glucosyl-(indol-3-yl)acetate	1	1	1	1	CPD-9567 [ C16 H18 N O7, tgt= ]
<i>N</i>-(&beta;-D-glucosyl)-(indol-3-yl)acetyl-L-glutamate	1	1	1	1	CPD-9573 [ C21 H24 N2 O10, tgt= ]
<i>N</i>, <i>N</i>-dihydroxytrihomomethionine	1	1	1	1	CPD-14050 [ C8 H16 N O4 S, tgt= ]
<i>N</i>,<i>N</i>-dihydroxyhomomethionine	1	1	1	1	CPD-14046 [ C6 H12 N O4 S, tgt= ]
<i>N</i>,<i>N</i>-dihydroxy-L-tyrosine	1	1	1	1	CPD-7070 [ C9 H10 N O5, tgt= ]
<i>N</i><sup>1</sup>-(5-phospho-&beta;-D-ribosyl)glycinamide	1	1	1	1	5-PHOSPHO-RIBOSYL-GLYCINEAMIDE [ C7 H14 N2 O8 P, tgt= ]
<i>N</i><SUP>1</SUP>-acetylspermidine	1	1	1	1	CPD-568 [ C9 H23 N3 O, tgt= ]
<i>N</i><sup>6</sup>-(&Delta;<sup>2</sup>-isopentenyl)-adenosine 5'-monophosphate	1	1	1	1	CPD-4205 [ C15 H20 N5 O7 P, tgt= ]
<i>N</i><sup>7</sup>-methylguanosine	1	1	1	1	CPD-15544 [ C11 H16 N5 O5, tgt= ]
<i>N</i><SUP>8</SUP>-acetylspermidine	1	1	1	1	CPD-3462 [ C9 H23 N3 O, tgt= ]
<i>N</i>-acetyl-&beta;-D-glucosaminyl group	1	1	1	1	CPD-8944 [ C8 H15 N O6, tgt= ]
<i>N</i>-acetyl-farnesylcysteine	1	1	1	1	CPD-12592 [ C20 H32 N O3 S, tgt= ]
<i>N</i>-demethylvindolidine	1	1	1	1	CPD-19898 [ C21 H27 N2 O3, tgt= ]
<i>N</i>-heptylpantothenamide	1	1	1	1	CPD0-1153 [ C16 H32 N2 O4, tgt= ]
<i>p</i>-mercuribenzoate	1	1	1	1	CPD-7388 [ C7 H4 Hg O2, tgt= ]
<i>p</i>-nitrophenyl-&beta;-D-cellobioside	1	1	1	1	CPD-13199 [ C18 H25 N O13, tgt= ]
<i>p</i>-nitrophenyl-&beta;-D-xylopyranoside	1	1	1	1	CPD-13210 [ C11 H13 N O7, tgt= ]
<i>S</i>-(hydroxymethyl)glutathione	1	1	1	1	S-HYDROXYMETHYLGLUTATHIONE [ C11 H18 N3 O7 S, tgt= ]
<i>S</i>-formylglutathione	1	1	1	1	CPD-548 [ C11 H16 N3 O7 S, tgt= ]
<i>S</i>-methylglutathione	1	1	1	1	S-METHYLGLUTATHIONE [ C11 H18 N3 O6 S, tgt= ]
<i>sym</i>-homospermidine	1	1	1	1	CPD-1821 [ C8 H24 N3, tgt= ]
<i>trans</i>-2-coumarate	1	1	1	1	2-COUMARATE [ C9H7O3, tgt= ]
<i>trans</i>-4-hydroxy-L-proline	1	1	1	1	4-HYDROXY-L-PROLINE [ C5 H9 N O3, tgt= ]
<i>trans</i>-5-<i>O</i>-(4-coumaroyl)-D-quinate	1	1	1	1	4-COUMAROYLQUINATE [ C16 H17 O8, tgt= ]
<i>trans</i>-5-O-(4-coumaroyl)shikimate	1	1	1	1	CPD-412 [ C16 H15 O7, tgt= ]
<i>trans</i>-resveratrol	1	1	1	1	CPD-83 [ C14 H12 O3, tgt= ]
<i>trans</i>-zeatin	1	1	1	1	CPD-4210 [ C10H13N5O, tgt= ]
<i>trans</i>-zeatin riboside diphosphate	1	1	1	1	CPD-4204 [ C15 H20 N5 O11 P2, tgt= ]
1-(1<i>H</i>-indol-3-yl)-2-<i>aci</i>-nitroethane	1	1	1	1	CPD-12386 [ C10 H10 N2 O2, tgt= ]
1-(methylsulfanyl)-7-<i>aci</i>-nitroheptane	1	1	1	1	CPD-12398 [ C8 H17 N O2 S, tgt= ]
1-(methylsulfanyl)-9-<i>aci</i>-nitrononane	1	1	1	1	CPD-12404 [ C10 H21 N O2 S, tgt= ]
1,2-di<i>-O-</i>octylglycerol	1	1	1	1	CPD0-1810 [ C19 H40 O3, tgt= ]
1,2-dioctanoyl-1-amino-2,3-propanediol	1	1	1	1	CPD0-1808 [ C19H37NO4, tgt= ]
1,3,5-trihydroxyxanthone	1	1	1	1	CPD-6882 [ C13 H7 O5, tgt= ]
1,3,7-trihydroxyxanthone	1	1	1	1	CPD-6883 [ C13 H7 O5, tgt= ]
1,5,7-trihydroxy-6-methoxy-2-methylanthraquinone	1	1	1	1	CPD-9623 [ C16 H12 O6, tgt= ]
1,6,8-trihydroxy-7-methoxy-2-methylanthraquinone	1	1	1	1	CPD-9627 [ C16 H12 O6, tgt= ]
1,7,8-trihydroxy-6-methoxy-2-methylanthraquinone	1	1	1	1	CPD-9628 [ C16 H12 O6, tgt= ]
1-<i>O</i>-4-hydroxybenzoyl-&beta;-<i>D</i>-glucose	1	1	1	1	CPD-15283 [ C13 H16 O8, tgt= ]
10-deacetyl-2-debenzoylbaccatin III	1	1	1	1	10-DEACETYL-2-DEBENZOYLBACCATIN-III [ C22 H32 O9, tgt= ]
10-hydroxy-&alpha;-humulene	1	1	1	1	CPD-11422 [ C15 H24 O, tgt= ]
11&alpha;,30-dihydroxy-&beta;-amyrin	1	1	1	1	CPD-13669 [ C30 H50 O3, tgt= ]
1-16:0-2-18:1-diacylglycerol-trimethylhomoserine	1	1	1	1	CPDIO2-5 [ C44 H83 N O7, tgt= ]
1-16:0-2-18:2-diacylglycerol-trimethylhomoserine	1	1	1	1	CPDIO2-6 [ C44H81NO7, tgt= ]
1-16:0-2-18:3-diacylglycerol-trimethylhomoserine	1	1	1	1	CPDIO2-7 [ C44 H79 N O7, tgt= ]
12,13&beta;-epoxy-16&beta;-hydroxy-&beta;-amyrin	1	1	1	1	CPD-16622 [ C30 H50 O3, tgt= ]
13<SUP>1</SUP>-hydroxy-magnesium-protoporphyrin IX 13-monomethyl ester	1	1	1	1	13-HYDROXY-MAGNESIUM-PROTOPORP [ C35 H33 Mg N4 O5, tgt= ]
13-epi manoyl oxide	1	1	1	1	CPD-12751 [ C20 H34 O, tgt= ]
13-hydroxylupanine	1	1	1	1	13-HYDROXYLUPININE [ C15 H25 N2 O2, tgt= ]
15,16-dihydrobiliverdin	1	1	1	1	1516-DIHYDROBILIVERDIN [ C33 H34 N4 O6, tgt= ]
16, 17-dihydro-16&alpha;, 17-dihydroxy gibberellin A<sub>9</sub>	1	1	1	1	CPD-12362 [ C19 H25 O6, tgt= ]
1843U89	1	1	1	1	CPD-12510 [ C27 H22 N4 O6, tgt= ]
1-chloro-2,4-dinitrobenzene	1	1	1	1	1-CHLORO-24-DINITROBENZENE [ C6 H3 Cl N2 O4, tgt= ]
1D-<i>myo</i>-inositol (1,2,3,4,6)-penta<i>kis</i>phosphate	1	1	1	1	CPD-6661 [ C6 H7 O21 P5, tgt= ]
1-deoxycapsidiol	1	1	1	1	CPD-4662 [ C15 H24 O, tgt= ]
1-naphthol glucoside	1	1	1	1	CPD-13686 [ C16 H18 O6, tgt= ]
1-O,6-O-digalloyl-&beta;-D-glucose	1	1	1	1	1-O6-O-DIGALLOYL-BETA-D-GLUCOSE [ C20 H20 O14, tgt= ]
1-palmitoleylglycerol 3-phosphate	1	1	1	1	CPDQT-515 [ C19 H37 O7 P, tgt= ]
1-palmitoyl-<i>sn</i>-glycerol 3-phosphate	1	1	1	1	1-PALMITOYLGLYCEROL-3-PHOSPHATE [ C19 H37 O7 P, tgt= ]
2-(cystein-<i>S</i>-yl)-2-(1H-indol-3-yl)-acetonitrile	1	1	1	1	CPD-12636 [ C13 H13 N3 O2 S, tgt= ]
2-(glutathion-<i>S</i>-yl)-2-carboxypropane	1	1	1	1	CPD-17439 [ C14H21N3O8S, tgt= ]
2-(glutathion-<i>S</i>-yl)-propene	1	1	1	1	CPD-17444 [ C13 H20 N3 O6 S, tgt= ]
2',3,4,4',6'-pentahydroxychalcone 4'-<i>O</i>-&beta;-D-glucoside	1	1	1	1	CPD-8633 [ C21 H22 O11, tgt= ]
2,4,6-trihydroxybenzophenone	1	1	1	1	CPD-6881 [ C13 H10 O4, tgt= ]
2,4-diamino-6-methyl-5,3'-(2-trifluoromethylphenoxy)prop-1'-yloxypyrimidine	1	1	1	1	CPD0-1587 [ C15H17F3N4O2, tgt= ]
2,5-diamino-6-(5-phospho-D-ribosylamino)pyrimidin-4(3H)-one	1	1	1	1	DIAMINO-OH-PHOSPHORIBOSYLAMINO-PYR [ C9 H14 N5 O8 P, tgt= ]
2,6-diaminopurine	1	1	1	1	CPD0-2060 [ C5 H8 N6, tgt= ]
2-[(2'-methylsulfanyl)hexyl]maleate	1	1	1	1	CPD-19480 [ C11 H16 O4 S, tgt= ]
2-[(2'-methylsulfanyl)pentyl]maleate	1	1	1	1	CPD-19479 [ C10 H14 O4 S, tgt= ]
2-[(3'-methylsulfanyl)propyl]malate	1	1	1	1	CPDQT-31 [ C8 H12 O5 S, tgt= ]
2-[(4'-methylsulfanyl)butyl]malate	1	1	1	1	CPDQT-32 [ C9 H14 O5 S, tgt= ]
2-[hydroperoxy-(4-glucosyl-hydroxyphenyl)methyl]-6-hydroxy-1-benzofuran-3-one	1	1	1	1	CPD-17478 [ C21 H22 O11, tgt= ]
22-hydroxy-docosanoyl-CoA	1	1	1	1	CPD-14826 [ C43 H74 N7 O18 P3 S, tgt= ]
22-oxo-docosanoyl-CoA	1	1	1	1	CPD-17633 [ C43 H72 N7 O18 P3 S, tgt= ]
24-<i>epi</i>-campesterol	1	1	1	1	CPD-8134 [ C28 H48 O, tgt= ]
24-epibrassinolide	1	1	1	1	CPD-11835 [ C28 H48 O6, tgt= ]
24-methyldesmosterol	1	1	1	1	CPD-4141 [ C28 H46 O, tgt= ]
24-methylenecholesterol	1	1	1	1	CPD-706 [ C28 H46 O, tgt= ]
26-hydroxycastasterone	1	1	1	1	CPD-12500 [ C28 H48 O6, tgt= ]
2-aminoprop-2-enoate	1	1	1	1	2-AMINOACRYLATE [ C3 H5 N O2, tgt= ]
2-benzoyloxy-3-butenylglucosinolate	1	1	1	1	CPD-12421 [ C18 H22 N O11 S2, tgt= ]
2-bromoporphobilinogen	1	1	1	1	2-BROMOPORPHOBILINOGEN [ C10 H12 Br N2 O4, tgt= ]
2-butyl-4-hydroxy-5-methyl-3(2H)-furanone	1	1	1	1	CPD-10209 [ C9 H14 O3, tgt= ]
2-carboxy-D-arabinitol 1-phosphate	1	1	1	1	2-CARBOXY-D-ARABINITOL-1-PHOSPHATASE [ C6 H10 O10 P, tgt= ]
2'-chloro-2'-deoxyuridine-5'-diphosphate	1	1	1	1	CPD0-1394 [ C9 H10 Cl N2 O11 P2, tgt= ]
2'-deoxyadenosine	1	1	1	1	DEOXYADENOSINE [ C10H13N5O3, tgt= ]
2-fluorobenzoate	1	1	1	1	2-FLUOROBENZOATE [ C7 H4 F O2, tgt= ]
2'-hydroxy 3,6,7,3',4'-pentamethylquercetagetin	1	1	1	1	CPD-14862 [ C20 H20 O9, tgt= ]
2-hydroxy-3-carboxy-4,5-cyclopropylhex-5-enoate	1	1	1	1	CPD-9737 [ C8 H8 O5, tgt= ]
2-iminopropanoate	1	1	1	1	CPD-16015 [ C3 H5 N O2, tgt= ]
2-mercaptosuccinate	1	1	1	1	CPD0-1262 [ C4 H4 O4 S, tgt= ]
2-methoxy-6-<i>all trans</i>-nonaprenyl-1,4-benzoquinol	1	1	1	1	CPD-9870 [ C52 H80 O3, tgt= ]
2-methyl-6-all-trans-nonaprenyl-1,4-benzoquinol	1	1	1	1	2-METHYL-6-SOLANYL-14-BENZOQUINONE [ C52H80O2, tgt= ]
2-naphthol glucoside	1	1	1	1	CPD-13683 [ C16 H18 O6, tgt= ]
2-O-caffeoylglucarate	1	1	1	1	2-O-CAFFEOYLGLUCARATE [ C15 H14 O11, tgt= ]
2'-O-methyllicodione	1	1	1	1	CPD-4302 [ C16 H13 O5, tgt= ]
2-oxo-3-carboxy-4,5-cyclopropylhex-5-enoate	1	1	1	1	CPD-9738 [ C8 H6 O5, tgt= ]
2-oxohexa-4,5-cyclopropyl-5-enoate	1	1	1	1	CPD-9735 [ C6 H5 O3, tgt= ]
2-phospho-4-(cytidine 5'-diphospho)-2-C-methyl-D-erythritol	1	1	1	1	2-PHOSPHO-4-CYTIDINE-5-DIPHOSPHO-2-C-MET [ C14 H22 N3 O17 P3, tgt= ]
2-succinyl-5-enolpyruvoyl-6-hydroxy-3-cyclohexene-1-carboxylate	1	1	1	1	CPD-9924 [ C14 H13 O9, tgt= ]
2-succinylbenzoate	1	1	1	1	O-SUCCINYLBENZOATE [ C11 H8 O5, tgt= ]
2-undecanone	1	1	1	1	2-UNDECANONE [ C11 H22 O, tgt= ]
3&beta;-hydroxy-4&beta;-methyl-5&alpha;-cholest-7-ene-4&alpha;-carboxylate	1	1	1	1	CPD-5846 [ C29H47O3, tgt= ]
3-(methylsulfanyl)propanoate	1	1	1	1	CPD-7672 [ C4 H7 O2 S, tgt= ]
3-(phosphonoacetylamido)-L-alanine	1	1	1	1	CPD0-1454 [ C5 H10 N2 O6 P, tgt= ]
3,4-dihydroxymandelonitrile &beta;-<i>D</i>-glucoside	1	1	1	1	CPD-14593 [ C14 H17 N O8, tgt= ]
3,5-dimethoxytoluene	1	1	1	1	CPD-9502 [ C9 H12 O2, tgt= ]
3,6,7,2',4'-pentamethylquercetagetin	1	1	1	1	CPD-14888 [ C20 H20 O9, tgt= ]
3,7,3',4'-tetramethylquercetin	1	1	1	1	CPD-14852 [ C19 H18 O7, tgt= ]
3,8-divinyl chlorophyllide <i>a</i>	1	1	1	1	DIVINYLCHLOROPHYLLIDE-A [ C35 H30 Mg N4 O5, tgt= ]
3-[(3'-methylsulfanyl)propyl]malate	1	1	1	1	CPDQT-36 [ C8 H12 O5 S, tgt= ]
3-[(4'-methylsulfanyl)butyl]malate	1	1	1	1	CPDQT-37 [ C9 H14 O5 S, tgt= ]
3-<i>O</i>-methylkaempferol	1	1	1	1	CPD-14950 [ C16 H12 O6, tgt= ]
3-cyano-L-alanine	1	1	1	1	CPD-603 [ C4 H5 N2 O2, tgt= ]
3-deazaadenine	1	1	1	1	3-DEAZAADENINE [ C6 H7 N4, tgt= ]
3-dehydroquinate	1	1	1	1	DEHYDROQUINATE [ C7 H9 O6, tgt= ]
3'-deoxyadenosine	1	1	1	1	CPD-10129 [ C10 H13 N5 O3, tgt= ]
3-deoxycapsidiol	1	1	1	1	CPD-4663 [ C15 H24 O, tgt= ]
3-deoxy-D-<i>glycero</i>-D-<i>galacto</i>-non-2-ulopyranosonate	1	1	1	1	CPD-10734 [ C9 H15 O9, tgt= ]
3-epoxy-16-methoxy-2,3-dihydrotabersonine	1	1	1	1	CPD-19893 [ C22H27N2O4, tgt= ]
3-geranyl-4-hydroxybenzoate	1	1	1	1	CPD-9318 [ C17H21O3, tgt= ]
3-hydroxy-3-carboxy-4,5-cyclopropylhex-5-enoate	1	1	1	1	CPD-9736 [ C8 H8 O5, tgt= ]
3-hydroxybenzoate	1	1	1	1	3-HYDROXYBENZOATE [ C7 H5 O3, tgt= ]
3-hydroxycinnamate	1	1	1	1	CPD-10797 [ C9H7O3, tgt= ]
3-hydroxypropanoyl-CoA	1	1	1	1	3-HYDROXY-PROPIONYL-COA [ C24 H36 N7 O18 P3 S, tgt= ]
3-methoxytyramine	1	1	1	1	CPD-7650 [ C9H14NO2, tgt= ]
3-methyl-1,2-didehydro-2,3-dihydrosqualene	1	1	1	1	CPD-14263 [ C31 H52, tgt= ]
3-methyl-2-butenal	1	1	1	1	PRENAL [ C5H8O, tgt= ]
3-oxobehenoyl-CoA	1	1	1	1	CPD-10283 [ C43 H72 N7 O18 P3 S, tgt= ]
3-phenyl-2-oxopropanoate	1	1	1	1	PHENYL-PYRUVATE [ C9H7O3, tgt= ]
3-phenylpropionaldoxime	1	1	1	1	CPD-12328 [ C9H11NO, tgt= ]
3-propylphosphoenolpyruvate	1	1	1	1	CPD0-1554 [ C6 H8 O6 P, tgt= ]
4&alpha;-carboxy-ergosta-7,24(24<sup>1</sup>)-dien-3&beta;-ol	1	1	1	1	CPD-12909 [ C29H45O3, tgt= ]
4&alpha;-formyl,4&beta;,14&alpha;-dimethyl-9&beta;,19-cyclo-5&alpha;-ergost-24(24<sup>1</sup>)-en-3&beta;-ol	1	1	1	1	CPD-12866 [ C31H50O2, tgt= ]
4&alpha;-methyl-5&alpha;-cholest-7-en-3-one	1	1	1	1	4-ALPHA-METHYL-5-ALPHA-CHOLEST-7-EN-3-ON [ C28 H46 O, tgt= ]
4&alpha;-methyl-5&alpha;-cholesta-7,24-dien-3&beta;-ol	1	1	1	1	CPD-12860 [ C28 H46 O, tgt= ]
4&alpha;-methyl-5&alpha;-cholesta-8,24-dien-3&beta;-ol	1	1	1	1	4-METHYL-824-CHOLESTADIENOL [ C28 H46 O, tgt= ]
4-(methylsulfanyl)-2-oxobutanoate	1	1	1	1	CPD-479 [ C5 H7 O3 S, tgt= ]
4-(methylsulfanyl)butyl-glucosinolate	1	1	1	1	CPDQT-281 [ C12 H22 N O9 S3, tgt= ]
4,21-dehydrogeissoschizine	1	1	1	1	421-DEHYDROGEISSOSCHIZINE [ C21 H23 N2 O3, tgt= ]
4,9-dimethyldodeca-2,4,6,8,10-pentaene-1,12-dial	1	1	1	1	CPD-7202 [ C14 H16 O2, tgt= ]
4-[(4E,6E)-3-oxo-7-phenylhepta-4,6-dien-1-yl]cyclohexa-3,5-diene-1,2-dione	1	1	1	1	CPD-12204 [ C19 H16 O3, tgt= ]
4-<i>O</i>-methyl-DIBOA-glucoside	1	1	1	1	CPD-6627 [ C15 H19 N O9, tgt= ]
4-<i>O</i>-oxalyl-L-threonate	1	1	1	1	CPD-13911 [ C6 H6 O8, tgt= ]
4-coumarate	1	1	1	1	COUMARATE [ C9H7O3, tgt= ]
4-coumaroyl-3-hydroxyagmatine	1	1	1	1	CPD-12237 [ C14 H21 N4 O3, tgt= ]
4-fluorobenzoate	1	1	1	1	4-FLUOROBENZOATE [ C7 H4 F O2, tgt= ]
4-guanidinobutyraldehyde	1	1	1	1	CPD-825 [ C5 H12 N3 O, tgt= ]
4-hydroxybenzoate	1	1	1	1	4-hydroxybenzoate [ C7 H5 O3, tgt= ]
4-hydroxyphenylbutan-2-one	1	1	1	1	CPD-8647 [ C10 H12 O2, tgt= ]
4-methylsalicylate	1	1	1	1	CPD-8815 [ C8 H7 O3, tgt= ]
4-methylumbelliferyl-&beta;-D-cellobioside	1	1	1	1	CPD-13212 [ C22 H28 O13, tgt= ]
5-&alpha;-pregnane-3,20-dione	1	1	1	1	CPD-293 [ C21 H32 O2, tgt= ]
[truncated: 315 more rows]

## Sheet: Roots
	Average Abundance
[truncated: 2,180 more rows]
