# Supplementary material for: Foliar and Root Comparative Metabolomics and Phenolic Profiling of Micro-Tom Tomato (Solanum lycopersicum L.) Plants Associated with a Gene Expression Analysis in Response to Short Daily UV Treatments
Source: Plants (Basel). 2022 Jul 12;11(14):1829. doi: 10.3390/plants11141829 (PMC9319050; doi:10.3390/plants11141829)
Supplement: Supplementary file 1 [file plants-11-01829-s001.zip › Table S3 - Volcano Leaves and Roots.xlsx]

## Sheet: Volcano - Leaves
Byosynthesis								Degradation							Sec Met pathway biosynthesis							Sec Met pathway degradation
category		compound	Log2FC 11D normalised	Log2FC REC normalised	p-value			category		compound	Log2FC 11D normalised	Log2FC REC normalised	p-value		category		compound	Log2FC 11D normalised	Log2FC REC normalised	p-value		category		compound	Log2FC 11D normalised	Log2FC REC normalised	p-value
Amino Acid Biosynthesis	CYS	L-cysteine	-1.152	-1.393	0.003015			Amino Acid Degradation	SUC	succinate	17.009	-4.081	0.00139589		Phenylpropanoid Derivative Biosynthesis	CPD-10077	afrormosin-7-O-glucoside	0.096	-12.608	0.0107383		Phenylpropanoid Derivative Degradation	CPD-14703	furcatin	-0.182	-0.62	0.00506393
Amino Acid Biosynthesis	OXALACETIC_ACID	oxaloacetate	-0.298	-0.453	0.0155986			Amino Acid Degradation	2K-ADIPATE	2-oxoadipate	16.671	12.116	3.56573e-09		Phenylpropanoid Derivative Biosynthesis	CPD-9621	robustaquinone G	-1.236	-16.206	0.0291074		Phenylpropanoid Derivative Degradation	DIHYDROCOUMARIN	3,4-dihydrocoumarin	-6.272	-14.726	0.0157312
Amino Acid Biosynthesis	SUC	succinate	17.009	-4.081	0.00139589			Amino Acid Degradation	CROTONYL-COA	crotonyl-CoA		4.216	0		Phenylpropanoid Derivative Biosynthesis	CPD-16550	1-O-caffeoyl-Î²-D-glucose	2.984	-0.012	0		Terpenoid Degradation	CPD-7199	3-hydroxy-9-apo-Î´-caroten-9-one	2.277	14.184	0.00370255
Amino Acid Biosynthesis	OXALO-SUCCINATE	oxalosuccinate	16.662	8.062	3.34247e-05			Amino Acid Degradation	ADENOSYL-HOMO-CYS	S-adenosyl-L-homocysteine (SAH)	-0.215	-0.973	0.003015		Phenylpropanoid Derivative Biosynthesis	VANILLIN	vanillin	0.28	-4.397	0
Amino Acid Biosynthesis	AICAR	5-amino-1-(5-phospho-D-ribosyl)imidazole-4-carboxamide (AICAR)	-9.574	-8.94	0			Fatty Acid and Lipid Degradation	PHOSPHORYL-CHOLINE	phosphocholine	-0.508	-0.928	0.00762789		Phenylpropanoid Derivative Biosynthesis	DIHYDROCOUMARIN	3,4-dihydrocoumarin	-6.272	-14.726	0.0157312
Amino Acid Biosynthesis	S-ADENOSYLMETHIONINAMINE	S-adenosyl 3-(methylsulfanyl)propylamine (dAdoMet)	-2.08	-0.565	0			Carbohydrates and Carboxylates Degradation	BETA-D-XYLOSE	Î²-D-xylopyranose	-0.88	-0.562	0.000533955		Phenylpropanoid Derivative Biosynthesis	CPD-9807	2-hydroxyferulate	0.788	-19.368	1.82624e-26
Amino Acid Biosynthesis	ADENOSYL-HOMO-CYS	S-adenosyl-L-homocysteine (SAH)	-0.215	-0.973	0.003015			Carbohydrates and Carboxylates Degradation	CPD-13061	L-threo-tetruronate	6.207	-4.189	0		Phenylpropanoid Derivative Biosynthesis	CPD-8068	kaempferol 3-O-Î²-D-glucosyl-(1->2)-glucosyl-(1->2)-Î²-D-glucoside	-0.586	-0.03	0
Amino Acid Biosynthesis	ANTHRANILATE	anthranilate	-0.912	22.194	0			Secondary Metabolite Degradation	CPDQT-432	4-methoxy-3-indolylmethyl glucosinolate aglycone	-10.629	-2.408	0.0144204		Phenylpropanoid Derivative Biosynthesis	O-SINAPOYLGLUCAROLACTONE	O-sinapoylglucarolactone	-0.761	-0.53	3.38894e-05
Amino Acid Biosynthesis	INDOLE-3-GLYCEROL-P	(1S,2R)-1-C-(indol-3-yl)glycerol 3-phosphate	8.954	0.29	0.0490291			Secondary Metabolite Degradation	ADENOSYL-HOMO-CYS	S-adenosyl-L-homocysteine (SAH)	-0.215	-0.973	0.003015		Phenylpropanoid Derivative Biosynthesis	CPD-81	coniferaldehyde glucoside	2.586	-12.223	0
Fatty Acid and Lipid Biosynthesis	ADENOSYL-HOMO-CYS	S-adenosyl-L-homocysteine (SAH)	-0.215	-0.973	0.003015			Secondary Metabolite Degradation	BENZALDEHYDE	benzaldehyde	-1.462	-13.169	0.0451395		Phenylpropanoid Derivative Biosynthesis	CPD-18130	arabidopate	0.728	-0.029	0.000533955
Fatty Acid and Lipid Biosynthesis	CPD-465	presqualene diphosphate	0.116	0.587	0.0369051			Secondary Metabolite Degradation	CPD-553	(R)-prunasin	0.364	23.488	0		Phenylpropanoid Derivative Biosynthesis	CPD-18120	caffealdehyde	-0.494	-0.898	0.0198121
Fatty Acid and Lipid Biosynthesis	CPD-13093	(9Z,12Z)-15,16-dihydroxyoctadeca-9,12-dienoate	-2.174	-18.278	0.003015			Secondary Metabolite Degradation	XANTHINE	xanthine	-0.001	-0.959	0.00951178		Phenylpropanoid Derivative Biosynthesis	CPD-16579	2-O-acetyl-3-O-trans-coutarate	-6.602	-8.94	0
Fatty Acid and Lipid Biosynthesis	CPD-13089	(12Z,15Z)-9,10-epoxyoctadeca-12,15-dienoate	2.638	18.187	0.00727051			Secondary Metabolite Degradation	CPDQT-428	indole-3-carbinol	0.289	0.018	0		Phenylpropanoid Derivative Biosynthesis	CPD-14998	cyanidin-3-O-Î²-D-galactoside	-17.404	-0.664	7.21606e-17
Fatty Acid and Lipid Biosynthesis	CPD-14426	(7Z,10Z,13Z,16Z,19Z)-docosapentaenoyl-CoA	0.153	12.007	0.0183476			Secondary Metabolite Degradation	CYS	L-cysteine	-1.152	-1.393	0.003015		Phenylpropanoid Derivative Biosynthesis	CONIFERYL-ALDEHYDE	coniferaldehyde	11.285	11.263	0.00337953
Fatty Acid and Lipid Biosynthesis	CPD-8078	1-18:3-2-16:2-monogalactosyldiacylglycerol	-7.509	-11.165	0.0332722			Secondary Metabolite Degradation	CPD-1881	indol-3-yl-acetothiohydroxamate-O-sulfonate	-6.035	-0.105	0		Phenylpropanoid Derivative Biosynthesis	CPD-8674	1-O-(4-coumaroyl)-Î²-D-glucose	9.833	17.807	4.55804e-06
Fatty Acid and Lipid Biosynthesis	CPD-8164	1-16:0-2-18:3-digalactosyldiacylglycerol	0.107	18.524	0.0250831			Secondary Metabolite Degradation	CPD-14703	furcatin	-0.182	-0.62	0.00506393		Phenylpropanoid Derivative Biosynthesis	574-TRIHYDROXY-3-METHOXYFLAVONE	chrysoeriol		2.087	0
Fatty Acid and Lipid Biosynthesis	PHOSPHORYL-CHOLINE	phosphocholine	-0.508	-0.928	0.00762789			Secondary Metabolite Degradation	DIHYDROCOUMARIN	3,4-dihydrocoumarin	-6.272	-14.726	0.0157312		Phenylpropanoid Derivative Biosynthesis	CPD-19956	butyl propanoate	-0.865	-0.778	0
Fatty Acid and Lipid Biosynthesis	CPD-5441	N-dimethylethanolamine phosphate	0.419	0.958	0.0106323			Secondary Metabolite Degradation	CPD-14735	2-phenylethyl 6-O-Î²-D-xylopyranosyl-Î²-D-glucopyranoside	-0.833	-0.771	8.55063e-05		Phenylpropanoid Derivative Biosynthesis	12-BIS-O-SINAPOYL-BETA-D-GLUCOSIDE	1,2-di-O-sinapoyl-Î²-D-glucose	-19.418	-4.888	6.71374e-05
Fatty Acid and Lipid Biosynthesis	CPD-8087	1-Î±-linolenoyl-2-palmitoyl-phosphatidylglycerol	0.153	13.634	0.00184602			Secondary Metabolite Degradation	CPD-7199	3-hydroxy-9-apo-Î´-caroten-9-one	2.277	14.184	0.00370255		Phenylpropanoid Derivative Biosynthesis	CPD-14822	quercetin-3-gentiotetraside	-4.824	-0.088	0
Fatty Acid and Lipid Biosynthesis	HYDROXY-METHYL-BUTENYL-DIP	(E)-4-hydroxy-3-methylbut-2-en-1-yl diphosphate	-0.163	-0.466	0.000533955			Hormone Degradation	CPDQT-523	brassinolide-23-O-glucoside		12.876	0		Phenylpropanoid Derivative Biosynthesis	CPD-7120	desmethylxanthohumol	-9.046	-10.935	0.00370255
Fatty Acid and Lipid Biosynthesis	CPD-4576	4Î±-formyl-4Î²-methyl-5Î±-cholesta-8,24-dien-3Î²-ol	0.153	12.544	0.003015			Hormone Degradation	CPD-204	gibberellin A8	6.567	-0.061	0		Phenylpropanoid Derivative Biosynthesis	PHLORETIN	phloretin	8.266	-0.112	0
Fatty Acid and Lipid Biosynthesis	CPD-4702	4Î±-carboxy-5Î±-cholesta-8,24-dien-3Î²-ol	0.153	9.546	0.0296539			Hormone Degradation	CPD-251	gibberellin A29-catabolite	0.513	17.901	0		Phenylpropanoid Derivative Biosynthesis	PELARGONIDIN-CMPD	pelargonidin	-8.03	-12.294	0
Fatty Acid and Lipid Biosynthesis	3-BETA-HYDROXY-5-ALPHA-PREGNANE-20-ONE	allopregnanolone	-0.142	-6.927	0			Hormone Degradation	CPD-632	gibberellin A34-catabolite	-18.397	18.057	0		Phenylpropanoid Derivative Biosynthesis	CPD-19725	(4S)-2,3-dehydroleucopelargonidin	-0.372	-0.494	0.00771813
Fatty Acid and Lipid Biosynthesis	CPD-17375	1-[18-hydroxyoeoyl]-2-[18-hydroxy-linoleoyl]-sn-glycerol	-18.135	-0.118	5.06598e-25			Hormone Degradation	SUC	succinate	17.009	-4.081	0.00139589		Phenylpropanoid Derivative Biosynthesis	CPD-8192	demethylsuberosin	8.79	-0.124	0
Carbohydrate Biosynthesis	OXALACETIC_ACID	oxaloacetate	-0.298	-0.453	0.0155986			Hormone Degradation	ADENOSYL-HOMO-CYS	S-adenosyl-L-homocysteine (SAH)	-0.215	-0.973	0.003015		Phenylpropanoid Derivative Biosynthesis	PHYTOALEXIN-CMPD	psoralen	-4.724	-2.474	0
Carbohydrate Biosynthesis	ADENOSYL-HOMO-CYS	S-adenosyl-L-homocysteine (SAH)	-0.215	-0.973	0.003015			Hormone Degradation	CPD-12350	methyl gibberellin A34	9.527	-0.124	0		Phenylpropanoid Derivative Biosynthesis	CPD-11941	luteoforol	-10.737	-8.51	0.0212504
Carbohydrate Biosynthesis	KDO-8P	3-deoxy-D-manno-octulosonate 8-phosphate (KDO-8P)	-0.445	-0.696	0.000242183										Phenylpropanoid Derivative Biosynthesis	CPD-3521	prunetin	6.328	16.456	0.00762789
Secondary Metabolite Biosynthesis	ADENOSYL-HOMO-CYS	S-adenosyl-L-homocysteine (SAH)	-0.215	-0.973	0.003015										Phenylpropanoid Derivative Biosynthesis	CPD-18092	delphinidin 3-O-Î²-D-sambubioside	-0.165	-1.699	0.00620801
Secondary Metabolite Biosynthesis	CPD-195	octanoate	0.39	0.126	0.0335964										Phenylpropanoid Derivative Biosynthesis	CPD-16541	cyanidin 3-O-Î²-D-p-coumaroylglucoside	-0.437	-2.163	0.003015
Secondary Metabolite Biosynthesis	CPD-13647	4-coumaroylhexanoylmethane	-18.376	-4.717	1.52326e-05										Phenylpropanoid Derivative Biosynthesis	CPD-9320	3''-hydroxy-geranylhydroquinone	1.097	0.596	0.0331448
Secondary Metabolite Biosynthesis	INDOLE-3-GLYCEROL-P	(1S,2R)-1-C-(indol-3-yl)glycerol 3-phosphate	8.954	0.29	0.0490291										Phenylpropanoid Derivative Biosynthesis	CPD-9711	dalcochinin	-4.098	-6.556	0
Secondary Metabolite Biosynthesis	SUC	succinate	17.009	-4.081	0.00139589										Phenylpropanoid Derivative Biosynthesis	CPD-6994	(2S)-eriodictyol	-0.372	-0.495	0.00780105
Secondary Metabolite Biosynthesis	CPD-13812	TRIBOA-Î²-D-glucoside	-0.811	-0.636	0.00370255										Phenylpropanoid Derivative Biosynthesis	CPD-7074	neohesperidin	-19.169	-2.36	0
Secondary Metabolite Biosynthesis	CPD-8686	9-oxononanoate		11.023	0										Phenylpropanoid Derivative Biosynthesis	CPD-3944	(+)-pisatin	0.741	0.289	4.88029e-05
Secondary Metabolite Biosynthesis	CYS-GLY	L-cysteinylglycine	-6.873	-2.266	0										Phenylpropanoid Derivative Biosynthesis	CAFFEOYLQUINATE	trans-5-O-caffeoyl-D-quinate	-10.373	-0.078	0
Secondary Metabolite Biosynthesis	CPD-9700	hypoglycin B	-12.85	1.895	0.0102899										Phenylpropanoid Derivative Biosynthesis	1-O-GALLOYL-BETA-D-GLUCOSE	1-O-galloyl-Î²-D-glucose	-6.6	-8.926	0
Secondary Metabolite Biosynthesis	CPD-9757	L-Î±-(methylenecyclopropyl)-glycine	-15.32	-0.331	1.17646e-05										Phenylpropanoid Derivative Biosynthesis	CPD-16747	6-methoxypodophyllotoxin 7-glucoside		0.115	0
Secondary Metabolite Biosynthesis	CONIFERYL-ALDEHYDE	coniferaldehyde	11.285	11.263	0.00337953										Phenylpropanoid Derivative Biosynthesis	L-DIHYDROXY-PHENYLALANINE	L-dopa	-0.416	-0.499	0.0288684
Secondary Metabolite Biosynthesis	CPD-15800	dihydropapaverine	-0.412	-0.931	0.00357617										Phenylpropanoid Derivative Biosynthesis	CPD-17595	(-)-yatein	0.476	0.468	0.003015
Secondary Metabolite Biosynthesis	6-O-METHYLNORLAUDANOSOLINE	(S)-6-O-methylnorlaudanosoline	-0.029	-0.405	0.00727051										Phenylpropanoid Derivative Biosynthesis	CPD-18756	(-)-4'-demethyl-deoxypodophyllotoxin	-0.215	-0.973	0.003015
Secondary Metabolite Biosynthesis	SEROTONIN	serotonin	-7.276	19.312	0.019919										Phenylpropanoid Derivative Biosynthesis	CPD-6981	rosmarinate	0.29	-18.443	0
Secondary Metabolite Biosynthesis	CPD-19420	norbelladine	10.476	-0.118	0.0158535										Phenylpropanoid Derivative Biosynthesis	CPD-674	cinnamate	0.212	5.11	0
Secondary Metabolite Biosynthesis	N-4-GUANIDINOBUTYL-4-HYDROXYCINNAMAMID	4-coumaroylagmatine	2.942	-0.124	0										Phenylpropanoid Derivative Biosynthesis	CPD-7384	pelargonidin 3-O-Î²-D-p-coumaroylglucoside	-0.42	-0.528	0.00425637
Secondary Metabolite Biosynthesis	RICININE	ricinine	0.638	0.307	0.0387802										Phenylpropanoid Derivative Biosynthesis	CPD-14984	quercetin 3-O-(3',6"-O-di-p-coumaroyl)-glucoside	13.143	4.942	0.0463677
Secondary Metabolite Biosynthesis	DEACETOXYVINDOLINE	deacetoxyvindoline	10.58	10.427	0.0406128										Phenylpropanoid Derivative Biosynthesis	SUC	succinate	17.009	-4.081	0.00139589
Secondary Metabolite Biosynthesis	VINDOLINE	vindoline	-10.766	-0.175	0.0407589										Phenylpropanoid Derivative Biosynthesis	ADENOSYL-HOMO-CYS	S-adenosyl-L-homocysteine (SAH)	-0.215	-0.973	0.003015
Secondary Metabolite Biosynthesis	CPD-14043	N-hydroxyhomomethionine	-0.536	-0.398	0.00521421										Phenylpropanoid Derivative Biosynthesis	CPD-14864	3,6,7,2',4'-pentamethylquercetagetin 3'-O-Î²-D-glucoside	0.037	-17.716	0
Secondary Metabolite Biosynthesis	3-HYDROXYPROPYL-GLUCOSINOLATE	3-hydroxypropyl-glucosinolate	-16.56	-5.587	0										Phytoalexin Biosynthesis	CPD-4661	capsidiol	0.412	0.169	0.00388287
Secondary Metabolite Biosynthesis	CPD-8898	17-O-acetylajmaline	0.38	-0.31	0										Phytoalexin Biosynthesis	CPD-4745	rishitin	14.518	9.497	0.00370255
Secondary Metabolite Biosynthesis	SCOPOLAMINE	scopolamine	9.467	9.294	0.0112103										Phytoalexin Biosynthesis	CPD-4721	solavetivone	0.471	0.022	0.01356
Secondary Metabolite Biosynthesis	CPD-4863	N,N-dihydroxy-L-valine	0.055	-1.155	0.0230425										Phytoalexin Biosynthesis	CPD-3521	prunetin	6.328	16.456	0.00762789
Secondary Metabolite Biosynthesis	CPD-14039	N-hydroxypentahomomethionine	2.035	-10.018	0										Phytoalexin Biosynthesis	SUC	succinate	17.009	-4.081	0.00139589
Secondary Metabolite Biosynthesis	CPDQT-418	7-(methylsulfanyl)heptyl-desulfoglucosinolate	0.492	0.493	0.003015										Phytoalexin Biosynthesis	CPD-3944	(+)-pisatin	0.741	0.289	4.88029e-05
Secondary Metabolite Biosynthesis	CPD-402	N-methylanthranilate	-0.785	-0.562	0.000130326										Phytoalexin Biosynthesis	ADENOSYL-HOMO-CYS	S-adenosyl-L-homocysteine (SAH)	-0.215	-0.973	0.003015
Secondary Metabolite Biosynthesis	ANTHRANILATE	anthranilate	-0.912	22.194	0										Terpenoid Biosynthesis	CPD-7971	norbixin	1.48	0.731	0.0114256
Secondary Metabolite Biosynthesis	VANILLIN	vanillin	0.28	-4.397	0										Terpenoid Biosynthesis	CPD-16534	ferruginol	8.694	4.288	0.0457815
Secondary Metabolite Biosynthesis	CPD-13030	N,N-dihydroxy-L-phenylalanine	-0.342	-0.422	0.0408511										Terpenoid Biosynthesis	DEACETOXYVINDOLINE	deacetoxyvindoline	10.58	10.427	0.0406128
Secondary Metabolite Biosynthesis	CPD-553	(R)-prunasin	0.364	23.488	0										Terpenoid Biosynthesis	VINDOLINE	vindoline	-10.766	-0.175	0.0407589
Secondary Metabolite Biosynthesis	CPD-9778	acetonedicarboxylate	-0.315	-0.612	0.00286758										Terpenoid Biosynthesis	CPD-14479	2Î±, 7Î²-dihydroxytaxusin	0.705	-0.695	0
Secondary Metabolite Biosynthesis	6-HYDROXYPROTOPINE	6-hydroxyprotopine	-11.4	-0.358	0.00832478										Terpenoid Biosynthesis	CPD-4745	rishitin	14.518	9.497	0.00370255
Secondary Metabolite Biosynthesis	12-HYDROXYDIHYDROCHELIRUBINE	12-hydroxydihydrochelirubine	-0.803	-1.462	0.000179391										Terpenoid Biosynthesis	CPD-4721	solavetivone	0.471	0.022	0.01356
Secondary Metabolite Biosynthesis	CPD-19489	3-carboxy-8-(methylsulfanyl)-2-oxooctanoate	-8.03	-9.896	0										Terpenoid Biosynthesis	CPD1F-4	(3S,5R,6R)-3,5-dihydroxy-6,7-didehydro-5,6-dihydro-12'-apo-Î²-caroten-12'-al	0.755	0.164	0.00727051
Secondary Metabolite Biosynthesis	XANTHINE	xanthine	-0.001	-0.959	0.00951178										Terpenoid Biosynthesis	CPD-12745	(13E)-8Î±-hydroxylabd-13-en-15-yl diphosphate	0.879	0.055	0.003015
Secondary Metabolite Biosynthesis	COLUMBAMINE	columbamine	-5.583	-16.749	0										Terpenoid Biosynthesis	CPD-1090	(-)-isopiperitenone	2.083	2.089	0.016057
Secondary Metabolite Biosynthesis	CPD-12212	tricoumaroyl spermidine	4.654	10.598	0.0107437										Terpenoid Biosynthesis	CPD-8838	juvenile hormone III	-0.14	-18.513	2.35894e-13
Secondary Metabolite Biosynthesis	CPD-12213	tricaffeoyl spermidine	1.282	-0.105	0										Terpenoid Biosynthesis	HYDROXY-METHYL-BUTENYL-DIP	(E)-4-hydroxy-3-methylbut-2-en-1-yl diphosphate	-0.163	-0.466	0.000533955
Secondary Metabolite Biosynthesis	STRICTOSIDINE	3-Î±(S)-strictosidine	-3.518	-13.129	0.00727051										Terpenoid Biosynthesis	CPD-17652	4'-hydroxyechinenone	0.26	23.828	0
Secondary Metabolite Biosynthesis	CPD-16440	iridotrial	1.141	0.368	0.00357617										Terpenoid Biosynthesis	CPD1F-86	gibberellin A17	-0.311	-0.944	4.88578e-05
Secondary Metabolite Biosynthesis	CPD-253	4,5-seco-dopa	-8.03	-12.306	0										Terpenoid Biosynthesis	SUC	succinate	17.009	-4.081	0.00139589
Secondary Metabolite Biosynthesis	CPD-8656	cyclo-dopa 5-O-glucoside	-13.945	-4.296	0.00199515										Terpenoid Biosynthesis	CPD-465	presqualene diphosphate	0.116	0.587	0.0369051
Secondary Metabolite Biosynthesis	CPD-8674	1-O-(4-coumaroyl)-Î²-D-glucose	9.833	17.807	4.55804e-06										Terpenoid Biosynthesis	CPD-7561	artemisinin	0.073	16.509	0.0328108
Secondary Metabolite Biosynthesis	CPD-8658	amaranthin	4.129	-0.091	0										Terpenoid Biosynthesis	CPD-8898	17-O-acetylajmaline	0.38	-0.31	0
Secondary Metabolite Biosynthesis	CPD-8853	2-descarboxy-cyclo-dopa	9.478	5.098	0.0433684										Terpenoid Biosynthesis	CPD-402	N-methylanthranilate	-0.785	-0.562	0.000130326
Secondary Metabolite Biosynthesis	2-HYDROXY-4-CARBOXYPYRIMIDINE	2-hydroxy-4-carboxypyrimidine	-8.061	-12.667	0										Terpenoid Biosynthesis	ANTHRANILATE	anthranilate	-0.912	22.194	0
Secondary Metabolite Biosynthesis	LATHYRINE	lathyrine	-0.47	-1.521	0.0457815										Terpenoid Biosynthesis	CPD-4661	capsidiol	0.412	0.169	0.00388287
Secondary Metabolite Biosynthesis	NICOTINATE_NUCLEOTIDE	Î²-nicotinate D-ribonucleotide (NaMN)	-0.189	-0.673	0.00762789										Terpenoid Biosynthesis	STRICTOSIDINE	3-Î±(S)-strictosidine	-3.518	-13.129	0.00727051
Secondary Metabolite Biosynthesis	CPD-14590	(R)-4-hydroxymandelonitrile	-15.75	0.64	0.000317871										Terpenoid Biosynthesis	CPD-16440	iridotrial	1.141	0.368	0.00357617
Secondary Metabolite Biosynthesis	CPD-9954	pseudoephedrine	12.93	-4.518	0										Terpenoid Biosynthesis	ADENOSYL-HOMO-CYS	S-adenosyl-L-homocysteine (SAH)	-0.215	-0.973	0.003015
Secondary Metabolite Biosynthesis	CPD-674	cinnamate	0.212	5.11	0										Terpenoid Biosynthesis	CPD-9524	desoxyhemigossypol	0.347	-0.04	0
Secondary Metabolite Biosynthesis	CPD-13081	solasodine 3-O-Î²-D-glucoside	-3.219	-1.921	0.0155986
Secondary Metabolite Biosynthesis	CPD-13080	solasodine	1.02	0.554	0.00025463
Secondary Metabolite Biosynthesis	L-DIHYDROXY-PHENYLALANINE	L-dopa	-0.416	-0.499	0.0288684
Secondary Metabolite Biosynthesis	TYRAMINE	tyramine	-0.511	-0.168	0.0280235
Secondary Metabolite Biosynthesis	OXALACETIC_ACID	oxaloacetate	-0.298	-0.453	0.0155986
Secondary Metabolite Biosynthesis	CPD-14528	2-phenylethyl Î²-D-glucopyranoside	16.668	-2.271	0
Secondary Metabolite Biosynthesis	CPD-10077	afrormosin-7-O-glucoside	0.096	-12.608	0.0107383
Secondary Metabolite Biosynthesis	CPD-9621	robustaquinone G	-1.236	-16.206	0.0291074
Secondary Metabolite Biosynthesis	CPD-16550	1-O-caffeoyl-Î²-D-glucose	2.984	-0.012	0
Secondary Metabolite Biosynthesis	DIHYDROCOUMARIN	3,4-dihydrocoumarin	-6.272	-14.726	0.0157312
Secondary Metabolite Biosynthesis	CPD-9807	2-hydroxyferulate	0.788	-19.368	1.82624e-26
Secondary Metabolite Biosynthesis	CPD-8068	kaempferol 3-O-Î²-D-glucosyl-(1->2)-glucosyl-(1->2)-Î²-D-glucoside	-0.586	-0.03	0
Secondary Metabolite Biosynthesis	O-SINAPOYLGLUCAROLACTONE	O-sinapoylglucarolactone	-0.761	-0.53	3.38894e-05
Secondary Metabolite Biosynthesis	CPD-81	coniferaldehyde glucoside	2.586	-12.223	0
Secondary Metabolite Biosynthesis	CPD-18130	arabidopate	0.728	-0.029	0.000533955
Secondary Metabolite Biosynthesis	CPD-18120	caffealdehyde	-0.494	-0.898	0.0198121
Secondary Metabolite Biosynthesis	CPD-16579	2-O-acetyl-3-O-trans-coutarate	-6.602	-8.94	0
Secondary Metabolite Biosynthesis	CPD-14998	cyanidin-3-O-Î²-D-galactoside	-17.404	-0.664	7.21606e-17
Secondary Metabolite Biosynthesis	574-TRIHYDROXY-3-METHOXYFLAVONE	chrysoeriol		2.087	0
Secondary Metabolite Biosynthesis	CPD-19956	butyl propanoate	-0.865	-0.778	0
Secondary Metabolite Biosynthesis	12-BIS-O-SINAPOYL-BETA-D-GLUCOSIDE	1,2-di-O-sinapoyl-Î²-D-glucose	-19.418	-4.888	6.71374e-05
Secondary Metabolite Biosynthesis	CPD-14822	quercetin-3-gentiotetraside	-4.824	-0.088	0
Secondary Metabolite Biosynthesis	CPD-7120	desmethylxanthohumol	-9.046	-10.935	0.00370255
Secondary Metabolite Biosynthesis	PHLORETIN	phloretin	8.266	-0.112	0
Secondary Metabolite Biosynthesis	PELARGONIDIN-CMPD	pelargonidin	-8.03	-12.294	0
Secondary Metabolite Biosynthesis	CPD-19725	(4S)-2,3-dehydroleucopelargonidin	-0.372	-0.494	0.00771813
Secondary Metabolite Biosynthesis	CPD-8192	demethylsuberosin	8.79	-0.124	0
Secondary Metabolite Biosynthesis	PHYTOALEXIN-CMPD	psoralen	-4.724	-2.474	0
Secondary Metabolite Biosynthesis	CPD-11941	luteoforol	-10.737	-8.51	0.0212504
Secondary Metabolite Biosynthesis	CPD-3521	prunetin	6.328	16.456	0.00762789
Secondary Metabolite Biosynthesis	CPD-18092	delphinidin 3-O-Î²-D-sambubioside	-0.165	-1.699	0.00620801
Secondary Metabolite Biosynthesis	CPD-16541	cyanidin 3-O-Î²-D-p-coumaroylglucoside	-0.437	-2.163	0.003015
Secondary Metabolite Biosynthesis	CPD-9320	3''-hydroxy-geranylhydroquinone	1.097	0.596	0.0331448
Secondary Metabolite Biosynthesis	CPD-9711	dalcochinin	-4.098	-6.556	0
Secondary Metabolite Biosynthesis	CPD-6994	(2S)-eriodictyol	-0.372	-0.495	0.00780105
Secondary Metabolite Biosynthesis	CPD-7074	neohesperidin	-19.169	-2.36	0
Secondary Metabolite Biosynthesis	CPD-3944	(+)-pisatin	0.741	0.289	4.88029e-05
Secondary Metabolite Biosynthesis	CAFFEOYLQUINATE	trans-5-O-caffeoyl-D-quinate	-10.373	-0.078	0
Secondary Metabolite Biosynthesis	1-O-GALLOYL-BETA-D-GLUCOSE	1-O-galloyl-Î²-D-glucose	-6.6	-8.926	0
Secondary Metabolite Biosynthesis	CPD-16747	6-methoxypodophyllotoxin 7-glucoside		0.115	0
Secondary Metabolite Biosynthesis	CPD-17595	(-)-yatein	0.476	0.468	0.003015
Secondary Metabolite Biosynthesis	CPD-18756	(-)-4'-demethyl-deoxypodophyllotoxin	-0.215	-0.973	0.003015
Secondary Metabolite Biosynthesis	CPD-6981	rosmarinate	0.29	-18.443	0
Secondary Metabolite Biosynthesis	CPD-7384	pelargonidin 3-O-Î²-D-p-coumaroylglucoside	-0.42	-0.528	0.00425637
Secondary Metabolite Biosynthesis	CPD-14984	quercetin 3-O-(3',6"-O-di-p-coumaroyl)-glucoside	13.143	4.942	0.0463677
Secondary Metabolite Biosynthesis	CPD-14864	3,6,7,2',4'-pentamethylquercetagetin 3'-O-Î²-D-glucoside	0.037	-17.716	0
Secondary Metabolite Biosynthesis	CPD-4661	capsidiol	0.412	0.169	0.00388287
Secondary Metabolite Biosynthesis	CPD-4745	rishitin	14.518	9.497	0.00370255
Secondary Metabolite Biosynthesis	CPD-4721	solavetivone	0.471	0.022	0.01356
Secondary Metabolite Biosynthesis	CPD-12202	1-phenyl-7-(3,4-dihydroxyphenyl)-hepta-1,3-dien-5-one	0.811	1.881	0.0408511
Secondary Metabolite Biosynthesis	CPD-12491	phenylmethanesulfenate	-0.011	-0.481	0.00370255
Secondary Metabolite Biosynthesis	CPD-13606	(Z)-butanethial S-oxide	1.233	2.215	0.0322055
Secondary Metabolite Biosynthesis	CPD-9298	S-allyl-L-cysteine	-0.35	-4.528	0
Secondary Metabolite Biosynthesis	CPD-9295	2-vinyl-[4H]-1,3-dithin	-0.579	-1.319	0.0144204
Secondary Metabolite Biosynthesis	CPD-7227	2'-deoxymugineate	-0.061	-0.469	0.00101708
Secondary Metabolite Biosynthesis	CPD-8058	D-galactosylononitol	-9.95	-8.496	0
Secondary Metabolite Biosynthesis	CPD-8047	galactopinitol A	-8.332	-8.483	0
Secondary Metabolite Biosynthesis	CPD-7971	norbixin	1.48	0.731	0.0114256
Secondary Metabolite Biosynthesis	CPD-16534	ferruginol	8.694	4.288	0.0457815
Secondary Metabolite Biosynthesis	CPD-14479	2Î±, 7Î²-dihydroxytaxusin	0.705	-0.695	0
Secondary Metabolite Biosynthesis	CPD1F-4	(3S,5R,6R)-3,5-dihydroxy-6,7-didehydro-5,6-dihydro-12'-apo-Î²-caroten-12'-al	0.755	0.164	0.00727051
Secondary Metabolite Biosynthesis	CPD-12745	(13E)-8Î±-hydroxylabd-13-en-15-yl diphosphate	0.879	0.055	0.003015
Secondary Metabolite Biosynthesis	CPD-1090	(-)-isopiperitenone	2.083	2.089	0.016057
Secondary Metabolite Biosynthesis	CPD-8838	juvenile hormone III	-0.14	-18.513	2.35894e-13
Secondary Metabolite Biosynthesis	HYDROXY-METHYL-BUTENYL-DIP	(E)-4-hydroxy-3-methylbut-2-en-1-yl diphosphate	-0.163	-0.466	0.000533955
Secondary Metabolite Biosynthesis	CPD-17652	4'-hydroxyechinenone	0.26	23.828	0
Secondary Metabolite Biosynthesis	CPD1F-86	gibberellin A17	-0.311	-0.944	4.88578e-05
Secondary Metabolite Biosynthesis	CPD-465	presqualene diphosphate	0.116	0.587	0.0369051
Secondary Metabolite Biosynthesis	CPD-7561	artemisinin	0.073	16.509	0.0328108
Secondary Metabolite Biosynthesis	CPD-9524	desoxyhemigossypol	0.347	-0.04	0
Secondary Metabolite Biosynthesis	HEXANOATE	hexanoate	-0.82	-0.377	0.0184402
Secondary Metabolite Biosynthesis	CPD-14533	adhyperforin	-0.673	-10.82	0.0270073
Secondary Metabolite Biosynthesis	CPD-11507	triketide pyrone	0.638	0.307	0.0387802
Secondary Metabolite Biosynthesis	3-METHYL-1-246-TRIHYDROXYPHENYLBUTAN	phlorisovalerophenone	0.195	12.715	0.0387802
Secondary Metabolite Biosynthesis	CPD-7106	humulone	-7.046	-18.908	0.000385508
Secondary Metabolite Biosynthesis	CPD-19784	phlormethylbutanophenone	16.669	12.663	0
Secondary Metabolite Biosynthesis	2346-TETRAHYDROXYBENZOPHENONE	2,3',4,6-tetrahydroxybenzophenone	0.075	-8.358	0
Hormone Biosynthesis	CPD-14649	carlactone	2.271	0.394	0.00293374
Hormone Biosynthesis	CPD1F-4	(3S,5R,6R)-3,5-dihydroxy-6,7-didehydro-5,6-dihydro-12'-apo-Î²-caroten-12'-al	0.755	0.164	0.00727051
Hormone Biosynthesis	CPD-10507	4-(indol-3-yl)butanoate	0.219	-0.175	0
Hormone Biosynthesis	ADENOSYL-HOMO-CYS	S-adenosyl-L-homocysteine (SAH)	-0.215	-0.973	0.003015
Hormone Biosynthesis	INDOLE_PYRUVATE	(indol-3-yl)pyruvate	-0.643	-0.615	0.000686983
Hormone Biosynthesis	CPD-723	6-deoxocastasterone	0.439	-6.788	0
Hormone Biosynthesis	CPD-669	lupinate	4.742	13.606	0.0225884
Hormone Biosynthesis	CPD-4619	cis-zeatin-9-N-glucoside	6.504	-0.061	0
Hormone Biosynthesis	CPD1F-86	gibberellin A17	-0.311	-0.944	4.88578e-05
Hormone Biosynthesis	SUC	succinate	17.009	-4.081	0.00139589
Hormone Biosynthesis	CPD-11253	trans-tuberonic acid	0.214	-0.009	0
Hormone Biosynthesis	CPD-8838	juvenile hormone III	-0.14	-18.513	2.35894e-13
Hormone Biosynthesis	SEROTONIN	serotonin	-7.276	19.312	0.019919

## Sheet: Volcano - Roots
Biosynthesis								Degradation								Sec Met pathway biosynth									Sec Met pathway degradation
category		compound	Log2FC 11D normalised	Log2FC REC normalised	p-value			category		compound	Log2FC 11D normalised	Log2FC REC normalised	p-value			category		compound	Log2FC 11D normalised	Log2FC REC normalised	p-value				category		compound	Log2FC 11D normalised	Log2FC REC normalised	p-value
Fatty Acid and Lipid Biosynthesis	CPD-465	presqualene diphosphate	13.258	11.835	0.00016312			Carbohydrates and Carboxylates Degradation	BETA-D-XYLOSE	Î²-D-xylopyranose	13.409	13.458	8.69671e-06			Phenylpropanoid Derivative Biosynthesis	CPD-9620	robustaquinone F	0.664	0.859	0.00644988				Terpenoid Degradation	CPD-8661	3Î²-hydroxy-Î²-cyclocitral	1.915	0.544	2.2202e-05
Fatty Acid and Lipid Biosynthesis	CPD-2190	1-18:3-2-16:3-monogalactosyldiacylglycerol	-2.128	-0.321	0.0301314			Secondary Metabolite Degradation	L-CANALINE	L-canaline	-0.068	2.258	0			Phenylpropanoid Derivative Biosynthesis	CPD-9807	2-hydroxyferulate	0.021	-18.928	6.15237e-29				Terpenoid Degradation	CPD-7727	Î²-D-glucopyranosyl abscisate	0.614	-0.124	0.0304424
Fatty Acid and Lipid Biosynthesis	CPD-8165	1-18:2-2-18:2-monogalactosyldiacylglycerol	2.169	1.413	0.0258159			Secondary Metabolite Degradation	CPDQT-428	indole-3-carbinol	0.003	-17.712	1.20372e-33			Phenylpropanoid Derivative Biosynthesis	CPD-4885	(-)-phaseollidin		2.189	0				Terpenoid Degradation	CPD-7725	phaseic acid	0.276	0.078	0.00252947
Fatty Acid and Lipid Biosynthesis	CPD-8086	1-linoleoyl-2-palmitoyl-phosphatidylglycerol	-2.005	-0.594	0.00688227			Secondary Metabolite Degradation	BENZYL-ALCOHOL	benzyl alcohol	-0.146	1.303	0.0181256			Phenylpropanoid Derivative Biosynthesis	O-SINAPOYLGLUCAROLACTONE	O-sinapoylglucarolactone	0.333	0.654	0.0118807
Fatty Acid and Lipid Biosynthesis	CPD-5962	5-Î²-pregnan-3,20 dione	0.003	13.956	0.00375084			Secondary Metabolite Degradation	CPD-8661	3Î²-hydroxy-Î²-cyclocitral	1.915	0.544	2.2202e-05			Phenylpropanoid Derivative Biosynthesis	CONIFERYL-ALDEHYDE	coniferaldehyde	-13.335	0.041	0.00252947
Fatty Acid and Lipid Biosynthesis	CPD-12928	4Î±-carboxy-5Î±-cholesta-7,24-dien-3Î²-ol	-0.888	-1.603	0.0247329			Secondary Metabolite Degradation	CPD-7727	Î²-D-glucopyranosyl abscisate	0.614	-0.124	0.0304424			Phenylpropanoid Derivative Biosynthesis	BENZYL-ALCOHOL	benzyl alcohol	-0.146	1.303	0.0181256
Secondary Metabolite Biosynthesis	CPD-9757	L-Î±-(methylenecyclopropyl)-glycine	12.901	12.886	2.60214e-05			Secondary Metabolite Degradation	CPD-7725	phaseic acid	0.276	0.078	0.00252947			Phenylpropanoid Derivative Biosynthesis	CPD-19956	butyl propanoate	-1.752	-8.54	0
Secondary Metabolite Biosynthesis	CPD-463	L-nicotianamine	12.245	18.555	3.69537e-05			Hormone Degradation	CPD-7727	Î²-D-glucopyranosyl abscisate	0.614	-0.124	0.0304424			Phenylpropanoid Derivative Biosynthesis	O-SINAPOYLCHOLINE	O-sinapoylcholine	-0.044	-8.937	0
Secondary Metabolite Biosynthesis	CPD-9422	5-oxooctanal	-0.834	-0.111	0.0134786			Hormone Degradation	CPD-7725	phaseic acid	0.276	0.078	0.00252947			Phenylpropanoid Derivative Biosynthesis	CPD-15474	gardenin B	10.377	11.567	0
Secondary Metabolite Biosynthesis	CONIFERYL-ALDEHYDE	coniferaldehyde	-13.335	0.041	0.00252947			Hormone Degradation	CPD-12501	26-hydroxybrassinolide	-0.022	-0.919	0.0316693			Phenylpropanoid Derivative Biosynthesis	CPD-15076	(Z)-6'-hydroxyferulate	0.042	-16.63	1.24283e-21
Secondary Metabolite Biosynthesis	CPD-8936	p-coumaroylserotonin	2.273	14.215	0.0328534											Phenylpropanoid Derivative Biosynthesis	CPD-15105	kaempferol 3-O-Î²-D-glucosylgalactoside	0.66	0.897	0.00644988
Secondary Metabolite Biosynthesis	CPD-19420	norbelladine	10.46	4.335	0.0258159											Phenylpropanoid Derivative Biosynthesis	CPD-14912	eupatolin	0.342	0.506	0.0179318
Secondary Metabolite Biosynthesis	CPD-12394	(E)-1-(L-cysteinylglycin-S-yl)-N-hydroxy-Ï‰-(methylsulfanyl)pentan-1-imine	4.156	12.442	0.00630067											Phenylpropanoid Derivative Biosynthesis	CPD-18098	cyanidin 3-O-Î²-D-caffeoylglucoside	0.657	0.895	0.00644988
Secondary Metabolite Biosynthesis	CPD-14751	ajmaline	-1.447	-0.419	0.031023											Phenylpropanoid Derivative Biosynthesis	CPD-8186	umbelliferone	2.48	15.091	0.0258159
Secondary Metabolite Biosynthesis	CPD-4243	sarpagine	12.775	-0.002	0											Phenylpropanoid Derivative Biosynthesis	CPD-14835	curcumin 4'-O-Î²-D-gentiotrioside	10.297	4.248	0.0248455
Secondary Metabolite Biosynthesis	R-N-METHYLCOCLAURINE	(R)-N-methylcoclaurine	0.121	-16.767	3.01547e-24											Phenylpropanoid Derivative Biosynthesis	CPD-16602	cyanidin 3-O-glucoside-7-O-(6-O-(p-hydroxybenzoyl)-glucoside)	0.042	-18.142	7.09154e-30
Secondary Metabolite Biosynthesis	SCOPOLAMINE	scopolamine	-1.486	-2.742	6.54386e-10											Phenylpropanoid Derivative Biosynthesis	CPD-16541	cyanidin 3-O-Î²-D-p-coumaroylglucoside	0.68	0.905	0.00644988
Secondary Metabolite Biosynthesis	CPD-402	N-methylanthranilate	13.385	11.166	0.000140198											Phenylpropanoid Derivative Biosynthesis	SINAPATE	sinapate	-8.522	-12.953	0.00600069
Secondary Metabolite Biosynthesis	CPD-12400	(E)-1-(L-cysteinylglycin-S-yl)-N-hydroxy-Ï‰-(methylsulfanyl)heptan-1-imine	4.548	-18.352	0.00630067											Phenylpropanoid Derivative Biosynthesis	2-O-CAFFEOYLGLUCARATE	2-O-caffeoylglucarate	0.042	-17.378	7.66517e-35
Secondary Metabolite Biosynthesis	MORPHINE	morphine	19.053	-19.082	0											Phenylpropanoid Derivative Biosynthesis	CPD-14989	quercetin 3-O-(3'-O-p-coumaroyl)-glucoside	14.117	14.665	0.00252947
Secondary Metabolite Biosynthesis	12-DEHYDRORETICULINIUM	1,2-dehydroreticuline	0.414	19.131	2.3682e-21											Phytoalexin Biosynthesis	CPD-4661	capsidiol	0.542	0.061	5.40506e-05
Secondary Metabolite Biosynthesis	L-CANALINE	L-canaline	-0.068	2.258	0											Phytoalexin Biosynthesis	CPD-8719	9Î±-copalyl diphosphate	0.555	-0.098	0.0346242
Secondary Metabolite Biosynthesis	METHYLNICOTINATE	trigonelline	13.282	0.066	0.00284533											Phytoalexin Biosynthesis	CPD-4721	solavetivone	0.601	-0.04	0.00252947
Secondary Metabolite Biosynthesis	CPDQT-285	5-(methylsulfanyl)pentyl-desulfoglucosinolate	20.283	-1.558	0											Phytoalexin Biosynthesis	DICOUMAROL	dicoumarol	-0.031	-4.238	0
Secondary Metabolite Biosynthesis	CPD-12396	(E)-1-(glutathion-S-yl)-N-hydroxy-Ï‰-(methylsulfanyl)hexan-1-imine	0.021	-11.184	0.0328534											Phytoalexin Biosynthesis	CPD-12111	4-hydroxycoumarin	-0.848	-3.094	0.0342773
Secondary Metabolite Biosynthesis	CPD-14834	noscapine	0.28	17.634	0											Phytoalexin Biosynthesis	CPD-4885	(-)-phaseollidin		2.189	0
Secondary Metabolite Biosynthesis	CPD-9620	robustaquinone F	0.664	0.859	0.00644988											Terpenoid Biosynthesis	TAXA-42011-DIEN-5-ALPHA-YL-ACETATE	taxa-4(20),11-dien-5-Î±-yl acetate	-0.331	-0.785	0.0158623
Secondary Metabolite Biosynthesis	CPD-9807	2-hydroxyferulate	0.021	-18.928	6.15237e-29											Terpenoid Biosynthesis	10-DEACETYL-2-DEBENZOYLBACCATIN-III	10-deacetyl-2-debenzoylbaccatin III	18.689	5.576	1.81992e-07
Secondary Metabolite Biosynthesis	CPD-4885	(-)-phaseollidin		2.189	0											Terpenoid Biosynthesis	CPD-10037	(+)-carvone	0.401	0.728	0.019315
Secondary Metabolite Biosynthesis	O-SINAPOYLGLUCAROLACTONE	O-sinapoylglucarolactone	0.333	0.654	0.0118807											Terpenoid Biosynthesis	CPD-14504	stevioside	-14.735	0.056	0.000102487
Secondary Metabolite Biosynthesis	BENZYL-ALCOHOL	benzyl alcohol	-0.146	1.303	0.0181256											Terpenoid Biosynthesis	CPD-12928	4Î±-carboxy-5Î±-cholesta-7,24-dien-3Î²-ol	-0.888	-1.603	0.0247329
Secondary Metabolite Biosynthesis	CPD-19956	butyl propanoate	-1.752	-8.54	0											Terpenoid Biosynthesis	CPD-9745	heliocide B1	3.36	1.571	3.92125e-13
Secondary Metabolite Biosynthesis	O-SINAPOYLCHOLINE	O-sinapoylcholine	-0.044	-8.937	0											Terpenoid Biosynthesis	CPD-4721	solavetivone	0.601	-0.04	0.00252947
Secondary Metabolite Biosynthesis	CPD-15474	gardenin B	10.377	11.567	0											Terpenoid Biosynthesis	CPD-8719	9Î±-copalyl diphosphate	0.555	-0.098	0.0346242
Secondary Metabolite Biosynthesis	CPD-15076	(Z)-6'-hydroxyferulate	0.042	-16.63	1.24283e-21											Terpenoid Biosynthesis	CPD-8662	crocetin	12.673	-1.976	0
Secondary Metabolite Biosynthesis	CPD-15105	kaempferol 3-O-Î²-D-glucosylgalactoside	0.66	0.897	0.00644988											Terpenoid Biosynthesis	CPD-8661	3Î²-hydroxy-Î²-cyclocitral	1.915	0.544	2.2202e-05
Secondary Metabolite Biosynthesis	CPD-14912	eupatolin	0.342	0.506	0.0179318											Terpenoid Biosynthesis	CPD-18262	geranyl Î²-D-glucopyranoside	0.671	0.607	0.0228218
Secondary Metabolite Biosynthesis	CPD-18098	cyanidin 3-O-Î²-D-caffeoylglucoside	0.657	0.895	0.00644988											Terpenoid Biosynthesis	CPD-13255	soyasaponin I	-0.7	-0.113	0.0346242
Secondary Metabolite Biosynthesis	CPD-8186	umbelliferone	2.48	15.091	0.0258159											Terpenoid Biosynthesis	CPD-15218	gibberellin A6	-0.015	17.117	0
Secondary Metabolite Biosynthesis	CPD-14835	curcumin 4'-O-Î²-D-gentiotrioside	10.297	4.248	0.0248455											Terpenoid Biosynthesis	CPD-465	presqualene diphosphate	13.258	11.835	0.00016312
Secondary Metabolite Biosynthesis	CPD-16602	cyanidin 3-O-glucoside-7-O-(6-O-(p-hydroxybenzoyl)-glucoside)	0.042	-18.142	7.09154e-30											Terpenoid Biosynthesis	CPD-14751	ajmaline	-1.447	-0.419	0.031023
Secondary Metabolite Biosynthesis	CPD-16541	cyanidin 3-O-Î²-D-p-coumaroylglucoside	0.68	0.905	0.00644988											Terpenoid Biosynthesis	CPD-4243	sarpagine	12.775	-0.002	0
Secondary Metabolite Biosynthesis	SINAPATE	sinapate	-8.522	-12.953	0.00600069											Terpenoid Biosynthesis	CPD-402	N-methylanthranilate	13.385	11.166	0.000140198
Secondary Metabolite Biosynthesis	2-O-CAFFEOYLGLUCARATE	2-O-caffeoylglucarate	0.042	-17.378	7.66517e-35											Terpenoid Biosynthesis	CPD-4661	capsidiol	0.542	0.061	5.40506e-05
Secondary Metabolite Biosynthesis	CPD-14989	quercetin 3-O-(3'-O-p-coumaroyl)-glucoside	14.117	14.665	0.00252947
Secondary Metabolite Biosynthesis	CPD-4661	capsidiol	0.542	0.061	5.40506e-05
Secondary Metabolite Biosynthesis	CPD-8719	9Î±-copalyl diphosphate	0.555	-0.098	0.0346242
Secondary Metabolite Biosynthesis	CPD-4721	solavetivone	0.601	-0.04	0.00252947
Secondary Metabolite Biosynthesis	DICOUMAROL	dicoumarol	-0.031	-4.238	0
Secondary Metabolite Biosynthesis	CPD-12111	4-hydroxycoumarin	-0.848	-3.094	0.0342773
Secondary Metabolite Biosynthesis	CPD-6801	aloesone	17.031	-0.096	1.17317e-27
Secondary Metabolite Biosynthesis	TAXA-42011-DIEN-5-ALPHA-YL-ACETATE	taxa-4(20),11-dien-5-Î±-yl acetate	-0.331	-0.785	0.0158623
Secondary Metabolite Biosynthesis	10-DEACETYL-2-DEBENZOYLBACCATIN-III	10-deacetyl-2-debenzoylbaccatin III	18.689	5.576	1.81992e-07
Secondary Metabolite Biosynthesis	CPD-10037	(+)-carvone	0.401	0.728	0.019315
Secondary Metabolite Biosynthesis	CPD-14504	stevioside	-14.735	0.056	0.000102487
Secondary Metabolite Biosynthesis	CPD-12928	4Î±-carboxy-5Î±-cholesta-7,24-dien-3Î²-ol	-0.888	-1.603	0.0247329
Secondary Metabolite Biosynthesis	CPD-9745	heliocide B1	3.36	1.571	3.92125e-13
Secondary Metabolite Biosynthesis	CPD-8662	crocetin	12.673	-1.976	0
Secondary Metabolite Biosynthesis	CPD-8661	3Î²-hydroxy-Î²-cyclocitral	1.915	0.544	2.2202e-05
Secondary Metabolite Biosynthesis	CPD-18262	geranyl Î²-D-glucopyranoside	0.671	0.607	0.0228218
Secondary Metabolite Biosynthesis	CPD-13255	soyasaponin I	-0.7	-0.113	0.0346242
Secondary Metabolite Biosynthesis	CPD-15218	gibberellin A6	-0.015	17.117	0
Secondary Metabolite Biosynthesis	CPD-465	presqualene diphosphate	13.258	11.835	0.00016312
Hormone Biosynthesis	CPD-4205	N6-(Î”2-isopentenyl)-adenosine 5'-monophosphate	0.258	17.597	0
Hormone Biosynthesis	CPD-15218	gibberellin A6	-0.015	17.117	0
Hormone Biosynthesis	CPD-11253	trans-tuberonic acid	-1.146	-1.215	0.0484142
